# Supplementary material for: Noninvasive Brain Stimulation Enhances Memory Acquisition and Is Associated with Synaptoneurosome Modification in the Rat Hippocampus
Source: eNeuro. 2019 Dec 3;6(6):ENEURO.0311-19.2019. doi: 10.1523/ENEURO.0311-19.2019 (PMC6900464; doi:10.1523/ENEURO.0311-19.2019)
Supplement: Extended Data Figure 1-3 — Proteomics data. Proteomics data analyzed for this manuscript were provided as an Excel file. Download Figure 1-3, XLSX file. [file sup_enu-eN-NWR-0311-19-s12.xlsx]

## Sheet: Normalized Proteomics Data
																							Base Mean of Normalized Abundance					log2FC				-log10(p value)
Protein FDR Confidence: Sequest HT	Accession	Entrez Gene ID	Ensembl Gene ID	Gene Symbol	Description	Exp. q-value: Sequest HT	Coverage [%]	# Peptides	# PSMs	# Unique Peptides	# Protein Groups	# AAs	MW [kDa]	Score Sequest HT: Sequest HT	# Peptides (by Search Engine): Sequest HT	GO Accessions	Biological Process	Cellular Component	Molecular Function	KEGG Pathway Accessions	# Razor Peptides		All	Sham	Acquisition	Recall		Acquisition/Sham	Recall/Sham	Acquisition/Recall		Acquisition vs. Sham	Recall vs. Sham	Acquisition vs. Recall
High	P60711	81822	ENSRNOG00000034254.4	Actb	Actin, cytoplasmic 1 [OS=Rattus norvegicus]	0	84	26	17885	17	1	375	41.7	92876.6	26	[GO:0000166]; GO:0036094; GO:1901265; GO:0005488; GO:0097159; GO:1901363; GO:0003674 [GO:0000790]; GO:0000785; GO:0044454; GO:0044427; GO:0000228; GO:0044428; GO:0005694; GO:0044446; GO:0031981; GO:0005634; GO:0043232; GO:0043229; GO:0044422; GO:0044424; GO:0070013; GO:0043231; GO:0043228; GO:0043226; GO:0005575; GO:0005622; GO:0044464; GO:0043233; GO:0043227; GO:0005623; GO:0031974 [GO:0000978];…	cell organization and biogenesis;response to stimulus	cytoplasm;cytoskeleton;cytosol;membrane;nucleus	DNA binding;nucleotide binding;protein binding	rno04921; rno04530; rno04210; rno04510; rno04015; rno05164; rno04520; rno04810; rno05416; rno05100; rno04611; rno04670; rno05205; rno04971; rno05412; rno05132; rno04145; rno05414; rno05410; rno04919; rno04390	11		1.96141e+09	1.98793e+09	1.94334e+09	1.95297e+09		-0.0327311	-0.0255974	-0.00713364		0.226764	0.145792	0.0559644
High	P85108	498736	ENSRNOG00000017558.6	Tubb2a	Tubulin beta-2A chain [OS=Rattus norvegicus]	0	80	29	10530	2	1	445	49.9	49524.7	29	[GO:0000166]; GO:0036094; GO:1901265; GO:0005488; GO:0097159; GO:1901363; GO:0003674 [GO:0003924]; GO:0017111; GO:0016462; GO:0016818; GO:0016817; GO:0016787; GO:0003824; GO:0003674 [GO:0005200]; GO:0005198; GO:0003674 [GO:0005525]; GO:0032550; GO:0032561; GO:0035639; GO:0001883; GO:0032549; GO:0019001; GO:0032555; GO:0043168; GO:1901265; GO:0001882; GO:0017076; GO:0032553; GO:0043167; GO:0097159…	cell organization and biogenesis	cytoplasm;cytoskeleton;nucleus	catalytic activity;nucleotide binding;structural molecule activity	rno04540; rno04145	39		1.94289e+09	2.00892e+09	1.88552e+09	1.93423e+09		-0.0914526	-0.0546574	-0.0367952		0.745332	0.491473	0.285223
High	P02688-1	24547	ENSRNOG00000016516.8	Mbp	myelin basic protein [OS=Rattus norvegicus]	0	52	13	2744	3	1	195	21.5	10704.3	13	[GO:0000165]; GO:0023014; GO:0035556; GO:0006468; GO:0007165; GO:0006464; GO:0016310; GO:0007154; GO:0009987; GO:0023052; GO:0050794; GO:0051716; GO:0036211; GO:0044267; GO:0006796; GO:0008150; GO:0050789; GO:0050896; GO:0019538; GO:0043412; GO:0044260; GO:0006793; GO:0065007; GO:0043170; GO:0044238; GO:1901564; GO:0044237; GO:0071704; GO:0008152; GO:0006807 [GO:0002020]; GO:0019899; GO:0005515; …	cell organization and biogenesis;metabolic process;regulation of biological process;response to stimulus	membrane	protein binding;structural molecule activity		10		1.53094e+09	1.65483e+09	1.43353e+09	1.50447e+09		-0.207115	-0.137428	-0.069687		0.524534	0.24721	0.118536
High	P06687	24213	ENSRNOG00000020263.6	Atp1a3	Sodium/potassium-transporting ATPase subunit alpha-3 [OS=Rattus norvegicus]	0	61	48	16459	33	1	1013	111.6	79013.9	48	[GO:0000166]; GO:0036094; GO:1901265; GO:0005488; GO:0097159; GO:1901363; GO:0003674 [GO:0001540]; GO:0042277; GO:0033218; GO:0005488; GO:0003674 [GO:0005391]; GO:0008556; GO:0015081; GO:0015079; GO:0015662; GO:0019829; GO:0015077; GO:0046873; GO:0042625; GO:0008324; GO:0022890; GO:0022853; GO:0042626; GO:0015075; GO:0022804; GO:0015405; GO:0016820; GO:0043492; GO:0022891; GO:0022857; GO:0015399;…	cellular homeostasis;regulation of biological process;response to stimulus;transport	cytoplasm;endoplasmic reticulum;Golgi;membrane;nucleus	catalytic activity;metal ion binding;nucleotide binding;protein binding;transporter activity	rno04978; rno04972; rno04964; rno04261; rno04961; rno04960; rno04024; rno04918; rno04974; rno04973; rno04971; rno04970; rno04260; rno04976; rno04911; rno04022; rno04919	17		1.44476e+09	1.42017e+09	1.42951e+09	1.4846e+09		0.00945541	0.0640075	-0.0545521		0.0768127	0.461961	0.424206
High	P68370	64158	ENSRNOG00000060728.1	Tuba1a	tubulin alpha-1A chain [OS=Rattus norvegicus]	0	77	27	23099	3	1	451	50.1	117885	27	[GO:0000166]; GO:0036094; GO:1901265; GO:0005488; GO:0097159; GO:1901363; GO:0003674 [GO:0003924]; GO:0017111; GO:0016462; GO:0016818; GO:0016817; GO:0016787; GO:0003824; GO:0003674 [GO:0005200]; GO:0005198; GO:0003674 [GO:0005515]; GO:0005488; GO:0003674 [GO:0005525]; GO:0032550; GO:0032561; GO:0035639; GO:0001883; GO:0032549; GO:0019001; GO:0032555; GO:0043168; GO:1901265; GO:0001882; GO:001707…	cell organization and biogenesis	cytoplasm;cytoskeleton;endosome;membrane;nucleus	catalytic activity;nucleotide binding;protein binding;structural molecule activity	rno04210; rno04540; rno04145	30		1.27111e+09	1.29541e+09	1.23736e+09	1.28055e+09		-0.0661447	-0.0166458	-0.0494988		0.631045	0.102723	0.417753
High	P10719	171374		Atp5b	ATP synthase subunit beta, mitochondrial [OS=Rattus norvegicus]	0	81	35	11519	35	1	529	56.3	55462	35	[GO:0000166]; GO:0036094; GO:1901265; GO:0005488; GO:0097159; GO:1901363; GO:0003674 [GO:0000275]; GO:0005753; GO:0045261; GO:0098800; GO:0045259; GO:0033178; GO:0044424; GO:0005743; GO:0044455; GO:0098796; GO:0098798; GO:0016469; GO:0005622; GO:0044464; GO:0019866; GO:0031966; GO:0044425; GO:0044429; GO:0043234; GO:0005575; GO:0005623; GO:0031090; GO:0031967; GO:0005740; GO:0016020; GO:0005739; …	cell differentiation;cellular homeostasis;metabolic process;regulation of biological process;transport	cell surface;membrane;mitochondrion;nucleus	catalytic activity;metal ion binding;nucleotide binding;protein binding;receptor activity;transporter activity	rno05010; rno00190; rno01100; rno05012; rno05016	0		1.08424e+09	1.08344e+09	1.15878e+09	1.0105e+09		0.0969876	-0.100553	0.197541		0.74292	0.542449	1.3743
High	P60203	24943	ENSRNOG00000002419.6	Plp1	Myelin proteolipid protein [OS=Rattus norvegicus]	0	51	10	2202	10	1	277	30.1	9010.43	10	[GO:0005198]; GO:0003674 [GO:0005886]; GO:0016020; GO:0044464; GO:0071944; GO:0005575; GO:0005623 [GO:0005887]; GO:0016021; GO:0031226; GO:0031224; GO:0044459; GO:0044425; GO:0005886; GO:0044464; GO:0005575; GO:0016020; GO:0071944; GO:0005623 [GO:0006954]; GO:0006952; GO:0006950; GO:0050896; GO:0008150 [GO:0007229]; GO:0007166; GO:0007165; GO:0007154; GO:0009987; GO:0023052; GO:0050794; GO:005171…	cell differentiation;cell organization and biogenesis;defense response;metabolic process;regulation of biological process;response to stimulus	membrane	protein binding;structural molecule activity		0		8.08865e+08	8.44401e+08	8.08663e+08	7.73531e+08		-0.0623895	-0.126469	0.0640798		0.133827	0.225275	0.10244
High	P15999	65262		Atp5a1	ATP synthase subunit alpha, mitochondrial [OS=Rattus norvegicus]	0	60	30	7168	30	1	553	59.7	35236.5	30	[GO:0000166]; GO:0036094; GO:1901265; GO:0005488; GO:0097159; GO:1901363; GO:0003674 [GO:0000275]; GO:0005753; GO:0045261; GO:0098800; GO:0045259; GO:0033178; GO:0044424; GO:0005743; GO:0044455; GO:0098796; GO:0098798; GO:0016469; GO:0005622; GO:0044464; GO:0019866; GO:0031966; GO:0044425; GO:0044429; GO:0043234; GO:0005575; GO:0005623; GO:0031090; GO:0031967; GO:0005740; GO:0016020; GO:0005739; …	metabolic process;regulation of biological process;transport	membrane;mitochondrion	catalytic activity;nucleotide binding;protein binding;RNA binding;transporter activity	rno05010; rno00190; rno01100; rno05012; rno05016	0		7.41873e+08	7.40455e+08	7.96949e+08	6.88214e+08		0.106076	-0.105554	0.21163		0.919748	0.598744	1.59059
High	P16086	64159	ENSRNOG00000015396.7	Sptan1	Spectrin alpha chain, non-erythrocytic 1 [OS=Rattus norvegicus]	0	64	134	12622	134	1	2472	284.5	59442.4	134	[GO:0003779]; GO:0008092; GO:0005515; GO:0005488; GO:0003674 [GO:0005509]; GO:0046872; GO:0043169; GO:0043167; GO:0005488; GO:0003674 [GO:0005515]; GO:0005488; GO:0003674 [GO:0005516]; GO:0005515; GO:0005488; GO:0003674 [GO:0005737]; GO:0044424; GO:0005622; GO:0044464; GO:0005575; GO:0005623 [GO:0005829]; GO:0044444; GO:0005737; GO:0044424; GO:0005622; GO:0044464; GO:0005575; GO:0005623 [GO:00058…	cell organization and biogenesis;regulation of biological process	cytoplasm;cytoskeleton;cytosol;membrane	metal ion binding;protein binding	rno04530; rno04210	0		7.03698e+08	6.97661e+08	7.33079e+08	6.80354e+08		0.0714417	-0.0362415	0.107683		1.19046	0.324736	1.4454
High	P13233	25275	ENSRNOG00000017496.4	Cnp	2',3'-cyclic-nucleotide 3'-phosphodiesterase [OS=Rattus norvegicus]	0	61	25	5645	25	1	420	47.2	27735.3	25	[GO:0000226]; GO:0007010; GO:0007017; GO:0006996; GO:0009987; GO:0016043; GO:0008150; GO:0071840 [GO:0003723]; GO:0003676; GO:0097159; GO:1901363; GO:0005488; GO:0003674 [GO:0003873]; GO:0008443; GO:0016773; GO:0019200; GO:0016772; GO:0016301; GO:0016740; GO:0003824; GO:0003674 [GO:0003972]; GO:0008452; GO:0016886; GO:0140098; GO:0016874; GO:0003824; GO:0003674 [GO:0004113]; GO:0004112; GO:000808…	cell differentiation;cell organization and biogenesis;metabolic process;response to stimulus	cytoplasm;membrane	catalytic activity;nucleotide binding;RNA binding		0		6.00198e+08	6.4977e+08	5.58532e+08	5.92292e+08		-0.21829	-0.133621	-0.0846694		0.661893	0.269958	0.167172
High	P11275	25400		Camk2a	Calcium/calmodulin-dependent protein kinase type II subunit alpha [OS=Rattus norvegicus]	0	68	21	7303	16	1	478	54.1	33575.7	21	[GO:0000082]; GO:0044772; GO:0044843; GO:0044770; GO:1903047; GO:0022402; GO:0000278; GO:0007049; GO:0009987; GO:0008150 [GO:0000166]; GO:0036094; GO:1901265; GO:0005488; GO:0097159; GO:1901363; GO:0003674 [GO:0002931]; GO:0006950; GO:0050896; GO:0008150 [GO:0004672]; GO:0016301; GO:0016773; GO:0140096; GO:0016772; GO:0003824; GO:0016740; GO:0003674 [GO:0004674]; GO:0004672; GO:0016301; GO:001677…	cell differentiation;cell organization and biogenesis;metabolic process;regulation of biological process;response to stimulus;transport	membrane;mitochondrion;nucleus	catalytic activity;metal ion binding;nucleotide binding;protein binding	rno04921; rno04912; rno04012; rno04020; rno04261; rno04722; rno04360; rno05214; rno04024; rno05152; rno04740; rno04725; rno04114; rno04066; rno04916; rno04922; rno05205; rno04713; rno04925; rno05031; rno04971; rno04750; rno04911; rno04720; rno04728; rno04310	0		5.1738e+08	5.14533e+08	5.45079e+08	4.92528e+08		0.0832022	-0.0630573	0.14626		0.685918	0.32524	1.03723
High	P08413	24245		Camk2b	Calcium/calmodulin-dependent protein kinase type II subunit beta [OS=Rattus norvegicus]	0	75	23	2614	12	1	542	60.4	12587.3	23	[GO:0000082]; GO:0044772; GO:0044843; GO:0044770; GO:1903047; GO:0022402; GO:0000278; GO:0007049; GO:0009987; GO:0008150 [GO:0000166]; GO:0036094; GO:1901265; GO:0005488; GO:0097159; GO:1901363; GO:0003674 [GO:0002030]; GO:0002029; GO:0006468; GO:0022401; GO:0045744; GO:0006464; GO:0016310; GO:0009968; GO:0023058; GO:0007186; GO:0008277; GO:0036211; GO:0044267; GO:0006796; GO:0007165; GO:0009966;…	cell differentiation;cell organization and biogenesis;metabolic process;regulation of biological process;response to stimulus;transport	cytoplasm;cytoskeleton;cytosol;endoplasmic reticulum;membrane	catalytic activity;nucleotide binding;protein binding	rno04921; rno04912; rno04012; rno04020; rno04261; rno04722; rno04360; rno05214; rno04024; rno05152; rno04740; rno04725; rno04114; rno04066; rno04916; rno04922; rno05205; rno04713; rno04925; rno05031; rno04971; rno04750; rno04911; rno04720; rno04728; rno04310	13		4.66293e+08	4.66479e+08	4.87563e+08	4.44838e+08		0.063775	-0.0685337	0.132309		0.962843	0.48444	1.22384
High	P47942	25416	ENSRNOG00000009625.6	Dpysl2	Dihydropyrimidinase-related protein 2 [OS=Rattus norvegicus]	0	73	28	5450	25	1	572	62.2	26058	28	[GO:0001975]; GO:0014075; GO:0010243; GO:0010033; GO:1901698; GO:0042221; GO:0050896; GO:0008150 [GO:0005515]; GO:0005488; GO:0003674 [GO:0005737]; GO:0044424; GO:0005622; GO:0044464; GO:0005575; GO:0005623 [GO:0005739]; GO:0043231; GO:0044444; GO:0043227; GO:0043229; GO:0005737; GO:0044424; GO:0043226; GO:0005622; GO:0044464; GO:0005575; GO:0005623 [GO:0005829]; GO:0044444; GO:0005737; GO:004442…	cell differentiation;cell organization and biogenesis;cellular component movement;development;regulation of biological process;response to stimulus;transport	cytoplasm;cytoskeleton;cytosol;membrane;mitochondrion	catalytic activity;protein binding	rno04360	4		4.32237e+08	4.26822e+08	4.12284e+08	4.57606e+08		-0.049995	0.100472	-0.150467		0.546391	1.06536	2.02287
High	P63018	24468		Hspa8	Heat shock cognate 71 kDa protein [OS=Rattus norvegicus]	0	71	31	5121	22	1	646	70.8	24246.8	31	[GO:0000082]; GO:0044772; GO:0044843; GO:0044770; GO:1903047; GO:0022402; GO:0000278; GO:0007049; GO:0009987; GO:0008150 [GO:0000151]; GO:0044424; GO:1990234; GO:0005622; GO:0044464; GO:1902494; GO:0005575; GO:0005623; GO:0032991 [GO:0000166]; GO:0036094; GO:1901265; GO:0005488; GO:0097159; GO:1901363; GO:0003674 [GO:0000902]; GO:0032989; GO:0009653; GO:0016043; GO:0048869; GO:0032502; GO:0048856…	cell organization and biogenesis;cellular component movement;metabolic process;regulation of biological process;response to stimulus;transport	cell surface;cytoplasm;cytosol;endosome;membrane;nucleus;spliceosomal complex;vacuole	catalytic activity;nucleotide binding;protein binding;RNA binding	rno04010; rno04612; rno05162; rno04213; rno05134; rno05169; rno05164; rno04915; rno04141; rno05145; rno03040; rno04144	9		4.28227e+08	4.248e+08	4.24064e+08	4.35817e+08		-0.0025004	0.0369394	-0.0394398		0.0278568	0.508266	0.636561
High	P04797	24383; 108351137	ENSRNOG00000018630.7	Gapdh; LOC685186; LOC108351137	glyceraldehyde-3-phosphate dehydrogenase [OS=Rattus norvegicus]	0	71	16	6313	16	1	333	35.8	30074.9	16	[GO:0000226]; GO:0007010; GO:0007017; GO:0006996; GO:0009987; GO:0016043; GO:0008150; GO:0071840 [GO:0004365]; GO:0043891; GO:0016620; GO:0016903; GO:0016491; GO:0003824; GO:0003674 [GO:0005515]; GO:0005488; GO:0003674 [GO:0005634]; GO:0043231; GO:0043227; GO:0043229; GO:0043226; GO:0044424; GO:0005575; GO:0005622; GO:0044464; GO:0005623 [GO:0005737]; GO:0044424; GO:0005622; GO:0044464; GO:000557…	cell death;cell organization and biogenesis;defense response;development;metabolic process;regulation of biological process;response to stimulus	cytoplasm;cytoskeleton;cytosol;membrane;mitochondrion;nucleus	catalytic activity;enzyme regulator activity;nucleotide binding;protein binding	rno05010; rno00010; rno01230; rno01100; rno04066; rno01200	0		4.27233e+08	4.2011e+08	4.08819e+08	4.52771e+08		-0.0393067	0.108013	-0.14732		0.294289	0.699195	1.05095
High	P31596-1	29482		Slc1a2	excitatory amino acid transporter 2 [OS=Rattus norvegicus]	0	60	30	4357	30	1	573	62.1	21638.6	30	[GO:0005313]; GO:0005310; GO:0015172; GO:0015179; GO:0046943; GO:0015171; GO:0005342; GO:0008514; GO:0022891; GO:0008509; GO:0022857; GO:0022892; GO:0015075; GO:0005215; GO:0003674 [GO:0005314]; GO:0005313; GO:0015370; GO:0005310; GO:0015172; GO:0015179; GO:0015081; GO:0015294; GO:0046943; GO:0015171; GO:0015077; GO:0046873; GO:0008324; GO:0015293; GO:0005342; GO:0008514; GO:0022890; GO:0015075; …	cell communication;cell organization and biogenesis;regulation of biological process;response to stimulus;transport	cell surface;membrane	metal ion binding;transporter activity	rno04724; rno05014	0		4.03294e+08	3.9851e+08	4.09421e+08	4.01951e+08		0.0389673	0.0124009	0.0265664		0.198853	0.0571027	0.114963
High	Q05175	64160		Basp1	Brain acid soluble protein 1 [OS=Rattus norvegicus]	0	69	15	4497	15	1	220	21.8	22761.8	15	[GO:0003714]; GO:0003712; GO:0000989; GO:0000988; GO:0140110; GO:0003674 [GO:0005516]; GO:0005515; GO:0005488; GO:0003674 [GO:0005634]; GO:0043231; GO:0043227; GO:0043229; GO:0043226; GO:0044424; GO:0005575; GO:0005622; GO:0044464; GO:0005623 [GO:0005737]; GO:0044424; GO:0005622; GO:0044464; GO:0005575; GO:0005623 [GO:0005886]; GO:0016020; GO:0044464; GO:0071944; GO:0005575; GO:0005623 [GO:000818…	cell differentiation;regulation of biological process	cytoplasm;membrane;nucleus	DNA binding;protein binding		0		3.78842e+08	3.77113e+08	3.84395e+08	3.75017e+08		0.027593	-0.00804293	0.0356359		0.0817389	0.0217117	0.113281
High	P59215-2	50664		Gnao1	Isoform Alpha-2 of Guanine nucleotide-binding protein G(o) subunit alpha [OS=Rattus norvegicus]	0	75	21	2055	3	1	354	40.1	8900.26	21	[GO:0003924]; GO:0017111; GO:0016462; GO:0016818; GO:0016817; GO:0016787; GO:0003824; GO:0003674 [GO:0004871]; GO:0003674 [GO:0005515]; GO:0005488; GO:0003674 [GO:0005525]; GO:0032550; GO:0032561; GO:0035639; GO:0001883; GO:0032549; GO:0019001; GO:0032555; GO:0043168; GO:1901265; GO:0001882; GO:0017076; GO:0032553; GO:0043167; GO:0097159; GO:1901363; GO:0036094; GO:0097367; GO:0000166; GO:0005488…	cell organization and biogenesis;regulation of biological process;response to stimulus	membrane	catalytic activity;metal ion binding;nucleotide binding;protein binding;signal transducer activity		18		3.77405e+08	3.79348e+08	3.77148e+08	3.75718e+08		-0.00839228	-0.0138722	0.00547991		0.0882438	0.135239	0.0570463
High	P01946	25632; 360504	ENSRNOG00000029886.3	Hba-a2; Hba1; Hba2	Hemoglobin subunit alpha-1/2 [OS=Rattus norvegicus]	0	73	8	1057	7	1	142	15.3	5520.03	8	[GO:0001540]; GO:0042277; GO:0033218; GO:0005488; GO:0003674 [GO:0001701]; GO:0043009; GO:0009792; GO:0009790; GO:0007275; GO:0032501; GO:0048856; GO:0008150; GO:0032502 [GO:0003674] [GO:0004601]; GO:0016209; GO:0016684; GO:0003674; GO:0016491; GO:0003824 [GO:0005344]; GO:0005215; GO:0140104; GO:0003674 [GO:0005506]; GO:0046914; GO:0046872; GO:0043169; GO:0043167; GO:0005488; GO:0003674 [GO:00055…	cell organization and biogenesis;metabolic process;regulation of biological process;response to stimulus;transport	membrane	antioxidant activity;catalytic activity;metal ion binding;protein binding;transporter activity	rno05144; rno05143	1		3.67785e+08	3.4657e+08	3.18141e+08	4.38645e+08		-0.123482	0.339905	-0.463387		0.480346	0.804908	1.21749
High	P61765-2	25558	ENSRNOG00000015420.8	Stxbp1	Isoform 2 of Syntaxin-binding protein 1 [OS=Rattus norvegicus]	0	60	27	4367	1	1	603	68.7	19468.2	27	[GO:0000149]; GO:0005515; GO:0005488; GO:0003674 [GO:0002576]; GO:0045055; GO:0006887; GO:0016192; GO:0032940; GO:0006810; GO:0009987; GO:0046903; GO:0051234; GO:0008150; GO:0051179 [GO:0003006]; GO:0022414; GO:0032502; GO:0000003; GO:0008150 [GO:0003723]; GO:0003676; GO:0097159; GO:1901363; GO:0005488; GO:0003674 [GO:0005515]; GO:0005488; GO:0003674 [GO:0005634]; GO:0043231; GO:0043227; GO:00432…	cell communication;cell organization and biogenesis;regulation of biological process;response to stimulus;transport	cytoplasm;cytoskeleton;cytosol;membrane;mitochondrion;nucleus	protein binding;RNA binding		31		3.59602e+08	3.57668e+08	3.57249e+08	3.63889e+08		-0.00169009	0.0248776	-0.0265677		0.0146553	0.253889	0.241947
High	P69897	29214	ENSRNOG00000061216.1	Tubb5	tubulin beta-5 chain [OS=Rattus norvegicus]	0	80	28	10561	2	1	444	49.6	49689	28	[GO:0000166]; GO:0036094; GO:1901265; GO:0005488; GO:0097159; GO:1901363; GO:0003674 [GO:0003924]; GO:0017111; GO:0016462; GO:0016818; GO:0016817; GO:0016787; GO:0003824; GO:0003674 [GO:0005200]; GO:0005198; GO:0003674 [GO:0005515]; GO:0005488; GO:0003674 [GO:0005525]; GO:0032550; GO:0032561; GO:0035639; GO:0001883; GO:0032549; GO:0019001; GO:0032555; GO:0043168; GO:1901265; GO:0001882; GO:001707…	cell organization and biogenesis	cytoplasm;cytoskeleton;membrane;nucleus	catalytic activity;nucleotide binding;protein binding;structural molecule activity	rno04540; rno04145	12		3.57383e+08	3.60405e+08	3.54231e+08	3.57512e+08		-0.0249299	-0.011625	-0.0133049		0.323441	0.149879	0.131495
High	P09951	24949	ENSRNOG00000010365.7	Syn1	Synapsin-1 [OS=Rattus norvegicus]	0	65	24	6932	23	1	704	73.9	31586	24	[GO:0000795]; GO:0099086; GO:0000794; GO:0044454; GO:0000228; GO:0000793; GO:0044427; GO:0044428; GO:0005694; GO:0031981; GO:0044446; GO:0005634; GO:0043232; GO:0070013; GO:0043229; GO:0044422; GO:0044424; GO:0043231; GO:0043228; GO:0043233; GO:0043226; GO:0005575; GO:0005622; GO:0044464; GO:0043227; GO:0031974; GO:0005623 [GO:0003779]; GO:0008092; GO:0005515; GO:0005488; GO:0003674 [GO:0003824];…	cell organization and biogenesis;transport	cytosol;Golgi;membrane	catalytic activity;nucleotide binding;protein binding		2		3.45386e+08	3.42891e+08	3.61786e+08	3.3148e+08		0.0773887	-0.0488263	0.126215		1.00422	0.335889	1.27038
High	P05708	25058		Hk1	Hexokinase-1 [OS=Rattus norvegicus]	0	46	33	5318	31	1	918	102.3	24740.6	33	[GO:0000166]; GO:0036094; GO:1901265; GO:0005488; GO:0097159; GO:1901363; GO:0003674 [GO:0001678]; GO:0042593; GO:0055082; GO:0033500; GO:0019725; GO:0048878; GO:0009987; GO:0042592; GO:0008150; GO:0065008; GO:0065007 [GO:0002931]; GO:0006950; GO:0050896; GO:0008150 [GO:0003824]; GO:0003674 [GO:0004340]; GO:0004396; GO:0016773; GO:0019200; GO:0016772; GO:0016301; GO:0016740; GO:0003824; GO:000367…	cellular homeostasis;metabolic process;regulation of biological process;response to stimulus	cytosol;membrane;mitochondrion	catalytic activity;nucleotide binding;protein binding	rno00010; rno00052; rno05230; rno00500; rno01100; rno00520; rno00051; rno04066; rno04973; rno00524; rno04930; rno04910; rno01200	3		3.37436e+08	3.34529e+08	3.56093e+08	3.21685e+08		0.0901228	-0.0564799	0.146603		1.59613	0.379419	1.46155
High	P21575-1	140694	ENSRNOG00000033835.6	Dnm1	Dynamin-1 [OS=Rattus norvegicus]	0	55	39	5061	1	1	864	97.2	24095.2	39	[GO:0000166]; GO:0036094; GO:1901265; GO:0005488; GO:0097159; GO:1901363; GO:0003674 [GO:0000266]; GO:0007005; GO:0048285; GO:0006996; GO:0016043; GO:0009987; GO:0071840; GO:0008150 [GO:0001917]; GO:0097458; GO:0044464; GO:0005575; GO:0005623 [GO:0002031]; GO:0002029; GO:0031623; GO:0022401; GO:0045744; GO:0006898; GO:0043112; GO:0009968; GO:0023058; GO:0007186; GO:0008277; GO:0006897; GO:0044260…	cell communication;cell organization and biogenesis;metabolic process;regulation of biological process;response to stimulus;transport	cytoplasm;cytoskeleton;Golgi;membrane	catalytic activity;nucleotide binding;protein binding;RNA binding	rno04961; rno04721; rno05100; rno04144; rno04072	44		3.25352e+08	3.23103e+08	3.41026e+08	3.11926e+08		0.0778869	-0.0507919	0.128679		0.90183	0.377429	1.38222
High	P04636	81829	ENSRNOG00000001440.4	Mdh2	Malate dehydrogenase, mitochondrial [OS=Rattus norvegicus]	0	64	18	2006	18	1	338	35.7	9284.86	18	[GO:0003723]; GO:0003676; GO:0097159; GO:1901363; GO:0005488; GO:0003674 [GO:0003824]; GO:0003674 [GO:0003854]; GO:0033764; GO:0016229; GO:0016616; GO:0016491; GO:0016614; GO:0003824; GO:0003674 [GO:0005515]; GO:0005488; GO:0003674 [GO:0005634]; GO:0043231; GO:0043227; GO:0043229; GO:0043226; GO:0044424; GO:0005575; GO:0005622; GO:0044464; GO:0005623 [GO:0005739]; GO:0043231; GO:0044444; GO:00432…	metabolic process	membrane;mitochondrion;nucleus;organelle lumen	catalytic activity;nucleotide binding;protein binding;RNA binding	rno00020; rno01100; rno00270; rno00620; rno00630; rno01200	0		3.25154e+08	3.2219e+08	3.28459e+08	3.24812e+08		0.0277998	0.0116931	0.0161067		0.430435	0.108188	0.160605
High	P11442	54241		Cltc	Clathrin heavy chain 1 [OS=Rattus norvegicus]	0	69	84	8492	84	1	1675	191.5	41591.1	84	[GO:0000278]; GO:0007049; GO:0009987; GO:0008150 [GO:0001649]; GO:0001503; GO:0030154; GO:0032501; GO:0048869; GO:0008150; GO:0009987; GO:0032502 [GO:0003723]; GO:0003676; GO:0097159; GO:1901363; GO:0005488; GO:0003674 [GO:0003725]; GO:0003723; GO:0003676; GO:0097159; GO:1901363; GO:0005488; GO:0003674 [GO:0005198]; GO:0003674 [GO:0005488]; GO:0003674 [GO:0005515]; GO:0005488; GO:0003674 [GO:0005…	cell differentiation;cell organization and biogenesis;metabolic process;regulation of biological process;transport	cytoplasm;cytoskeleton;cytosol;endosome;membrane;mitochondrion;vacuole	protein binding;RNA binding;structural molecule activity	rno04961; rno04721; rno05100; rno04142; rno04144; rno05016	0		3.02328e+08	2.98647e+08	3.01879e+08	3.06459e+08		0.0155275	0.0372523	-0.0217247		0.155137	0.360809	0.182027
High	Q9QUL6	60355		Nsf	Vesicle-fusing ATPase [OS=Rattus norvegicus]	0	61	38	4575	38	1	744	82.6	20775.6	38	[GO:0000149]; GO:0005515; GO:0005488; GO:0003674 [GO:0000166]; GO:0036094; GO:1901265; GO:0005488; GO:0097159; GO:1901363; GO:0003674 [GO:0001921]; GO:0001881; GO:0001919; GO:0010604; GO:0023056; GO:0031325; GO:0023051; GO:0043112; GO:0031323; GO:0060255; GO:0009893; GO:0043170; GO:0023052; GO:0048518; GO:0044237; GO:0048522; GO:0050789; GO:0044260; GO:0019222; GO:0050794; GO:0008152; GO:0071704;…	cell organization and biogenesis;metabolic process;regulation of biological process;response to stimulus;transport	cytoplasm;cytosol;membrane	catalytic activity;metal ion binding;nucleotide binding;protein binding;RNA binding	rno04721; rno04727; rno04962	0		2.88517e+08	2.9609e+08	2.88171e+08	2.8129e+08		-0.0391105	-0.0739776	0.0348671		0.269346	0.535894	0.154754
High	P11980-1	25630	ENSRNOG00000011329.7	Pkm	Pyruvate kinase PKM [OS=Rattus norvegicus]	0	64	29	3752	6	1	531	57.8	18111.2	29	[GO:0000166]; GO:0036094; GO:1901265; GO:0005488; GO:0097159; GO:1901363; GO:0003674 [GO:0000287]; GO:0046872; GO:0043169; GO:0043167; GO:0005488; GO:0003674 [GO:0001666]; GO:0006950; GO:0036293; GO:0050896; GO:0070482; GO:0008150; GO:0009628 [GO:0001889]; GO:0048732; GO:0061008; GO:0048513; GO:0048731; GO:0048856; GO:0007275; GO:0032502; GO:0032501; GO:0008150 [GO:0003723]; GO:0003676; GO:009715…	cell death;cell organization and biogenesis;metabolic process;response to stimulus	cytoplasm;cytosol;mitochondrion;nucleus	catalytic activity;metal ion binding;nucleotide binding;protein binding;RNA binding	rno05203; rno00230; rno00010; rno05230; rno01230; rno01100; rno00620; rno04922; rno04930; rno01200	25		2.8838e+08	2.78379e+08	2.73788e+08	3.12973e+08		-0.0239916	0.168988	-0.19298		0.138186	1.00833	1.25905
High	P07340	25650	ENSRNOG00000002934.7	Atp1b1	Sodium/potassium-transporting ATPase subunit beta-1 [OS=Rattus norvegicus]	0	44	12	1699	12	1	304	35.2	8157.31	12	[GO:0001666]; GO:0006950; GO:0036293; GO:0050896; GO:0070482; GO:0008150; GO:0009628 [GO:0001671]; GO:0008047; GO:0060590; GO:0030234; GO:0060589; GO:0098772; GO:0003674 [GO:0001824]; GO:0001701; GO:0048856; GO:0043009; GO:0032502; GO:0009792; GO:0008150; GO:0009790; GO:0007275; GO:0032501 [GO:0005391]; GO:0008556; GO:0015081; GO:0015079; GO:0015662; GO:0019829; GO:0015077; GO:0046873; GO:0042625…	cell organization and biogenesis;cellular homeostasis;metabolic process;regulation of biological process;response to stimulus;transport	membrane	catalytic activity;enzyme regulator activity;metal ion binding;nucleotide binding;protein binding;transporter activity	rno04978; rno04972; rno04964; rno04261; rno04961; rno04960; rno04024; rno04918; rno04974; rno04973; rno04971; rno04970; rno04260; rno04976; rno04911; rno04022; rno04919	0		2.74816e+08	2.72104e+08	2.68925e+08	2.8342e+08		-0.0169515	0.058785	-0.0757365		0.139307	0.441003	0.752325
High	Q9Z2L0	83529	ENSRNOG00000006375.6	Vdac1	voltage-dependent anion-selective channel protein 1 [OS=Rattus norvegicus]	0	73	16	4443	16	1	283	30.7	20872.1	16	[GO:0000166]; GO:0036094; GO:1901265; GO:0005488; GO:0097159; GO:1901363; GO:0003674 [GO:0001662]; GO:0002209; GO:0042596; GO:0006952; GO:0007610; GO:0033555; GO:0006950; GO:0008150; GO:0032501; GO:0050896 [GO:0005253]; GO:0005216; GO:0008509; GO:0015075; GO:0022838; GO:0022891; GO:0015267; GO:0022857; GO:0022892; GO:0022803; GO:0005215; GO:0003674 [GO:0005262]; GO:0005261; GO:0015085; GO:0005216…	cell communication;cell death;cell differentiation;defense response;regulation of biological process;response to stimulus;transport	membrane;mitochondrion;nucleus	nucleotide binding;protein binding;transporter activity	rno04020; rno05164; rno05012; rno05166; rno04022; rno05016; rno04621	0		2.68432e+08	2.62894e+08	2.82059e+08	2.60343e+08		0.10152	-0.014063	0.115583		1.36907	0.0921765	1.61313
High	P07335	24264	ENSRNOG00000010872.5	Ckb	Creatine kinase B-type [OS=Rattus norvegicus]	0	73	17	4540	17	1	381	42.7	22472.8	17	[GO:0000166]; GO:0036094; GO:1901265; GO:0005488; GO:0097159; GO:1901363; GO:0003674 [GO:0003824]; GO:0003674 [GO:0004111]; GO:0016301; GO:0016775; GO:0016772; GO:0016740; GO:0003824; GO:0003674 [GO:0005515]; GO:0005488; GO:0003674 [GO:0005524]; GO:0032559; GO:0035639; GO:0030554; GO:0032555; GO:0043168; GO:1901265; GO:0017076; GO:0032553; GO:0043167; GO:0097159; GO:1901363; GO:0000166; GO:009736…	cellular homeostasis;metabolic process	cytoplasm;cytosol;mitochondrion;nucleus	catalytic activity;nucleotide binding;protein binding	rno00330; rno01100	0		2.68249e+08	2.61927e+08	2.4991e+08	2.92911e+08		-0.0677554	0.161296	-0.229052		0.503941	1.04503	1.83075
High	P62161	50663; 24244; 24242	ENSRNOG00000004060.7; ENSRNOG00000016770.5	Calm2; Calm3; Calm1	Calmodulin [OS=Rattus norvegicus]	0	58	7	2442	5	1	149	16.8	11329.7	7	[GO:0000082]; GO:0044772; GO:0044843; GO:0044770; GO:1903047; GO:0022402; GO:0000278; GO:0007049; GO:0009987; GO:0008150 [GO:0000086]; GO:0044772; GO:0044839; GO:0044770; GO:1903047; GO:0022402; GO:0000278; GO:0007049; GO:0009987; GO:0008150 [GO:0000922]; GO:0005819; GO:0044430; GO:0015630; GO:0043232; GO:0005856; GO:0044446; GO:0043228; GO:0043229; GO:0044422; GO:0044424; GO:0043226; GO:0005575;…	cell differentiation;cell organization and biogenesis;cellular homeostasis;metabolic process;regulation of biological process;response to stimulus;transport	cytoplasm;cytoskeleton;cytosol;membrane;mitochondrion;nucleus	catalytic activity;enzyme regulator activity;metal ion binding;protein binding	rno04921; rno04912; rno05034; rno04020; rno04261; rno05010; rno04722; rno05214; rno04015; rno05133; rno04024; rno05152; rno04740; rno04915; rno04924; rno04014; rno04114; rno04916; rno04744; rno04922; rno04713; rno04925; rno05031; rno04270; rno04971; rno04970; rno04750; rno04070; rno04022; rno04720; rno04910; rno04728	3		2.62951e+08	2.6073e+08	2.62377e+08	2.65747e+08		0.00908377	0.0274994	-0.0184156		0.0380216	0.113598	0.0767435
High	Q6P9T8	296554		Tubb4b	Tubulin beta-4B chain [OS=Rattus norvegicus]	0	74	26	9582	3	1	445	49.8	44226.1	26	[GO:0000166]; GO:0036094; GO:1901265; GO:0005488; GO:0097159; GO:1901363; GO:0003674 [GO:0003725]; GO:0003723; GO:0003676; GO:0097159; GO:1901363; GO:0005488; GO:0003674 [GO:0003924]; GO:0017111; GO:0016462; GO:0016818; GO:0016817; GO:0016787; GO:0003824; GO:0003674 [GO:0005200]; GO:0005198; GO:0003674 [GO:0005515]; GO:0005488; GO:0003674 [GO:0005525]; GO:0032550; GO:0032561; GO:0035639; GO:00018…	cell organization and biogenesis	cytoplasm;cytoskeleton;nucleus	catalytic activity;nucleotide binding;protein binding;RNA binding;structural molecule activity	rno04540; rno04145	2		2.62409e+08	2.65855e+08	2.53968e+08	2.67403e+08		-0.0659973	0.00837394	-0.0743713		1.10131	0.0859989	1.05285
High	P63102	25578	ENSRNOG00000008195.6	Ywhaz	14-3-3 protein zeta/delta [OS=Rattus norvegicus]	0	67	15	3321	12	1	245	27.8	16994.4	15	[GO:0002553]; GO:0002441; GO:0043303; GO:0046907; GO:0140029; GO:0001821; GO:0002349; GO:0046879; GO:0002279; GO:0002448; GO:0032418; GO:0043299; GO:0051656; GO:0006810; GO:0051641; GO:0051649; GO:0006887; GO:0009987; GO:0046903; GO:0051608; GO:0002532; GO:0009914; GO:0023061; GO:0002275; GO:0045576; GO:0002444; GO:0051640; GO:0002252; GO:0045055; GO:0051234; GO:0051179; GO:0016192; GO:0032940; G…	cell organization and biogenesis;regulation of biological process;response to stimulus;transport	cytoplasm;mitochondrion;nucleus;vacuole	protein binding;RNA binding	rno05203; rno05161; rno05169; rno04151; rno04110; rno04114; rno04390	1		2.50065e+08	2.43318e+08	2.46866e+08	2.6001e+08		0.0208867	0.0957232	-0.0748366		0.136224	0.581033	0.453106
High	Q5XIF6	316531	ENSRNOG00000003597.5	Tuba4a	Tubulin alpha-4A chain [OS=Rattus norvegicus]	0	71	25	21568	9	1	448	49.9	110088	25	[GO:0000166]; GO:0036094; GO:1901265; GO:0005488; GO:0097159; GO:1901363; GO:0003674 [GO:0003674] [GO:0003924]; GO:0017111; GO:0016462; GO:0016818; GO:0016817; GO:0016787; GO:0003824; GO:0003674 [GO:0005200]; GO:0005198; GO:0003674 [GO:0005525]; GO:0032550; GO:0032561; GO:0035639; GO:0001883; GO:0032549; GO:0019001; GO:0032555; GO:0043168; GO:1901265; GO:0001882; GO:0017076; GO:0032553; GO:004316…	cell organization and biogenesis	cytoplasm;cytoskeleton	catalytic activity;nucleotide binding;protein binding;structural molecule activity	rno04210; rno04540; rno04145	2		2.43867e+08	2.69748e+08	2.35179e+08	2.26674e+08		-0.197851	-0.250989	0.0531381		0.965348	1.50068	0.256902
High	P62260	29753	ENSRNOG00000005290.5	Ywhae	14-3-3 protein epsilon [OS=Rattus norvegicus]	0	67	20	2778	19	1	255	29.2	12738.9	20	[GO:0000165]; GO:0023014; GO:0035556; GO:0006468; GO:0007165; GO:0006464; GO:0016310; GO:0007154; GO:0009987; GO:0023052; GO:0050794; GO:0051716; GO:0036211; GO:0044267; GO:0006796; GO:0008150; GO:0050789; GO:0050896; GO:0019538; GO:0043412; GO:0044260; GO:0006793; GO:0065007; GO:0043170; GO:0044238; GO:1901564; GO:0044237; GO:0071704; GO:0008152; GO:0006807 [GO:0001764]; GO:0016477; GO:0048699; …	cellular component movement;cellular homeostasis;metabolic process;regulation of biological process;response to stimulus;transport	cytoplasm;cytosol;membrane;mitochondrion;nucleus	enzyme regulator activity;protein binding;RNA binding	rno05203; rno04722; rno05169; rno04151; rno04110; rno04114; rno04390	2		2.28041e+08	2.23627e+08	2.24122e+08	2.36374e+08		0.00319121	0.0799777	-0.0767865		0.0187307	0.527497	0.509208
High	Q05962	85333		Slc25a4	ADP/ATP translocase 1 [OS=Rattus norvegicus]	0	67	18	5293	11	1	298	33	24364.7	18	[GO:0001889]; GO:0048732; GO:0061008; GO:0048513; GO:0048731; GO:0048856; GO:0007275; GO:0032502; GO:0032501; GO:0008150 [GO:0005215]; GO:0003674 [GO:0005471]; GO:0005347; GO:0015217; GO:0015301; GO:0000295; GO:0005346; GO:0008514; GO:0008509; GO:0099516; GO:0015216; GO:1901505; GO:0015075; GO:0015297; GO:0015215; GO:0022857; GO:0022891; GO:0015291; GO:0015605; GO:0015932; GO:0005215; GO:0022892;…	cell organization and biogenesis;regulation of biological process;response to stimulus;transport	membrane;mitochondrion;nucleus	protein binding;transporter activity	rno04020; rno05012; rno05166; rno04022; rno05016	8		2.2421e+08	2.19967e+08	2.3487e+08	2.17793e+08		0.0945755	-0.0143345	0.10891		0.822768	0.077152	0.892851
High	P06686	24212	ENSRNOG00000007290.6	Atp1a2	Sodium/potassium-transporting ATPase subunit alpha-2 [OS=Rattus norvegicus]	0	55	43	9763	27	1	1020	112.1	48713.6	43	[GO:0000166]; GO:0036094; GO:1901265; GO:0005488; GO:0097159; GO:1901363; GO:0003674 [GO:0001504]; GO:0001505; GO:0006836; GO:0098657; GO:0065008; GO:0006810; GO:0065007; GO:0051234; GO:0008150; GO:0051179 [GO:0002026]; GO:0008016; GO:0065008; GO:0060047; GO:1903522; GO:0065007; GO:0003015; GO:0008015; GO:0044057; GO:0008150; GO:0003013; GO:0003008; GO:0051239; GO:0032501; GO:0050789 [GO:0002087]…	cellular homeostasis;metabolic process;regulation of biological process;response to stimulus;transport	cytoplasm;endosome;membrane	catalytic activity;metal ion binding;nucleotide binding;protein binding;transporter activity	rno04978; rno04972; rno04964; rno04261; rno04961; rno04960; rno04024; rno04918; rno04974; rno04973; rno04971; rno04970; rno04260; rno04976; rno04911; rno04022; rno04919	1		2.20916e+08	2.13524e+08	2.13923e+08	2.35302e+08		0.00269802	0.140119	-0.137421		0.0164712	0.525344	0.523078
High	P62738	81633		Acta2	Actin, aortic smooth muscle [OS=Rattus norvegicus]	0	82	24	2672	15	1	377	42	11146.1	24	[GO:0000166]; GO:0036094; GO:1901265; GO:0005488; GO:0097159; GO:1901363; GO:0003674 [GO:0001725]; GO:0042641; GO:0097517; GO:0015629; GO:0044430; GO:0032432; GO:0005856; GO:0044446; GO:0043232; GO:0043229; GO:0044422; GO:0044424; GO:0043228; GO:0043226; GO:0005575; GO:0005622; GO:0044464; GO:0005623 [GO:0005524]; GO:0032559; GO:0035639; GO:0030554; GO:0032555; GO:0043168; GO:1901265; GO:0017076;…	regulation of biological process;response to stimulus	cytoplasm;cytoskeleton	nucleotide binding;protein binding	rno04270	0		2.09645e+08	2.21658e+08	1.99979e+08	2.07299e+08		-0.148484	-0.0966222	-0.0518619		0.490984	0.283398	0.242368
High	P82995	299331; 103692716	ENSRNOG00000007219.7; ENSRNOG00000059714.1	Hsp90aa1; LOC103692716	Heat shock protein HSP 90-alpha [OS=Rattus norvegicus]	0	60	37	3787	28	1	733	84.8	16974.4	37	[GO:0000166]; GO:0036094; GO:1901265; GO:0005488; GO:0097159; GO:1901363; GO:0003674 [GO:0001764]; GO:0016477; GO:0048699; GO:0048870; GO:0022008; GO:0006928; GO:0040011; GO:0051674; GO:0007399; GO:0030154; GO:0009987; GO:0008150; GO:0051179; GO:0048731; GO:0048869; GO:0007275; GO:0048856; GO:0032502; GO:0032501 [GO:0002134]; GO:0032551; GO:0032557; GO:0043168; GO:0001884; GO:0032549; GO:0019103;…	cell death;cell organization and biogenesis;cellular component movement;metabolic process;regulation of biological process;response to stimulus;transport	cell surface;cytoplasm;cytosol;membrane;nucleus	catalytic activity;enzyme regulator activity;nucleotide binding;protein binding;RNA binding	rno04612; rno05215; rno04915; rno04141; rno04151; rno04914; rno05200; rno04621	10		2.01039e+08	1.95632e+08	2.03278e+08	2.04207e+08		0.055309	0.0618834	-0.00657441		0.642794	0.655199	0.0488854
High	P21707	25716	ENSRNOG00000006426.6	Syt1	Synaptotagmin-1 [OS=Rattus norvegicus]	0	56	21	4388	16	1	421	47.4	19806.2	21	[GO:0000149]; GO:0005515; GO:0005488; GO:0003674 [GO:0001786]; GO:0005543; GO:0072341; GO:0008289; GO:0043168; GO:0005488; GO:0043167; GO:0003674 [GO:0005509]; GO:0046872; GO:0043169; GO:0043167; GO:0005488; GO:0003674 [GO:0005513]; GO:0009593; GO:0051592; GO:0042221; GO:0051606; GO:0010038; GO:0050896; GO:0010035; GO:0008150 [GO:0005515]; GO:0005488; GO:0003674 [GO:0005516]; GO:0005515; GO:00054…	cell differentiation;cell organization and biogenesis;regulation of biological process;response to stimulus;transport	cytoplasm;Golgi;membrane	metal ion binding;protein binding	rno04721	5		2.00706e+08	2.01162e+08	2.06475e+08	1.9448e+08		0.0376087	-0.0487352	0.0863438		0.526738	0.355408	0.733745
High	P15146	25595		Map2	microtubule-associated protein 2 [OS=Rattus norvegicus]	0	66	75	6483	1	1	1861	202.3	30734.9	75	[GO:0001578]; GO:0000226; GO:0007010; GO:0007017; GO:0006996; GO:0009987; GO:0016043; GO:0008150; GO:0071840 [GO:0002162]; GO:0005515; GO:0005488; GO:0003674 [GO:0003779]; GO:0008092; GO:0005515; GO:0005488; GO:0003674 [GO:0005515]; GO:0005488; GO:0003674 [GO:0005516]; GO:0005515; GO:0005488; GO:0003674 [GO:0005622]; GO:0044464; GO:0005575; GO:0005623 [GO:0005730]; GO:0031981; GO:0043232; GO:0044…	cell organization and biogenesis;regulation of biological process;response to stimulus	cytoplasm;cytoskeleton;cytosol;endoplasmic reticulum	protein binding		69		2.00161e+08	1.98294e+08	2.0088e+08	2.0131e+08		0.0186944	0.0217779	-0.00308357		0.146744	0.121532	0.0178613
High	P07323	24334; 100911625	ENSRNOG00000048365.2; ENSRNOG00000013141.6	Eno2; LOC100911625	Gamma-enolase [OS=Rattus norvegicus]	0	69	18	5189	12	1	434	47.1	26889.8	18	[GO:0000015]; GO:0044445; GO:1902494; GO:0005829; GO:0044444; GO:0032991; GO:0005737; GO:0044424; GO:0005575; GO:0005622; GO:0044464; GO:0005623 [GO:0000287]; GO:0046872; GO:0043169; GO:0043167; GO:0005488; GO:0003674 [GO:0001917]; GO:0097458; GO:0044464; GO:0005575; GO:0005623 [GO:0004634]; GO:0016836; GO:0016835; GO:0016829; GO:0003824; GO:0003674 [GO:0005615]; GO:0044421; GO:0005575; GO:000557…	cell organization and biogenesis;metabolic process;regulation of biological process;response to stimulus	cell surface;cytoplasm;membrane	catalytic activity;metal ion binding;protein binding	rno00010; rno01230; rno01100; rno03018; rno04066; rno01200	6		1.86463e+08	1.82765e+08	1.78575e+08	1.98048e+08		-0.0334557	0.115864	-0.14932		0.319958	1.07293	1.82053
High	P54313	81667	ENSRNOG00000001409.4	Gnb2	Guanine nucleotide-binding protein G(I)/G(S)/G(T) subunit beta-2 [OS=Rattus norvegicus]	0	77	14	2264	8	1	340	37.3	11630.4	14	[GO:0004871]; GO:0003674 [GO:0005246]; GO:0099106; GO:0016247; GO:0098772; GO:0003674 [GO:0005515]; GO:0005488; GO:0003674 [GO:0005615]; GO:0044421; GO:0005575; GO:0005576 [GO:0005737]; GO:0044424; GO:0005622; GO:0044464; GO:0005575; GO:0005623 [GO:0005765]; GO:0005764; GO:0098852; GO:0000323; GO:0005774; GO:0005773; GO:0044437; GO:0098588; GO:0098805; GO:0043231; GO:0044444; GO:0044446; GO:00310…	regulation of biological process;response to stimulus	cytoplasm;membrane	protein binding;signal transducer activity	rno05034; rno05032; rno04723; rno04724; rno04151; rno04725; rno05200; rno04014; rno04727; rno04713; rno04726; rno04062; rno04728	7		1.8437e+08	1.81096e+08	1.82227e+08	1.89786e+08		0.00897861	0.067614	-0.0586354		0.0271686	0.248803	0.215999
High	Q9QWN8	29211		Sptbn2	Spectrin beta chain, non-erythrocytic 2 [OS=Rattus norvegicus]	0	57	98	5287	98	1	2388	270.9	23898.3	98	[GO:0000139]; GO:0044431; GO:0098588; GO:0098791; GO:0005794; GO:0044444; GO:0044446; GO:0031090; GO:0031984; GO:0012505; GO:0043231; GO:0005737; GO:0044424; GO:0043229; GO:0044422; GO:0016020; GO:0043227; GO:0044464; GO:0005622; GO:0043226; GO:0005575; GO:0005623 [GO:0003779]; GO:0008092; GO:0005515; GO:0005488; GO:0003674 [GO:0005200]; GO:0005198; GO:0003674 [GO:0005515]; GO:0005488; GO:0003674…	cell organization and biogenesis;regulation of biological process;response to stimulus;transport	cytoplasm;cytoskeleton;cytosol;endosome;membrane	protein binding;structural molecule activity		0		1.7396e+08	1.70506e+08	1.86709e+08	1.64666e+08		0.130973	-0.0502822	0.181255		1.56727	0.289818	1.77767
High	P05065	24189	ENSRNOG00000052802.1	Aldoa	fructose-bisphosphate aldolase A [OS=Rattus norvegicus]	0	68	21	2474	7	1	364	39.3	11809	21	[GO:0001666]; GO:0006950; GO:0036293; GO:0050896; GO:0070482; GO:0008150; GO:0009628 [GO:0002020]; GO:0019899; GO:0005515; GO:0005488; GO:0003674 [GO:0003674] [GO:0003723]; GO:0003676; GO:0097159; GO:1901363; GO:0005488; GO:0003674 [GO:0003824]; GO:0003674 [GO:0004332]; GO:0016832; GO:0016830; GO:0016829; GO:0003824; GO:0003674 [GO:0005515]; GO:0005488; GO:0003674 [GO:0005615]; GO:0044421; GO:000…	cell organization and biogenesis;cellular homeostasis;metabolic process;regulation of biological process;response to stimulus	cytoplasm;cytoskeleton;cytosol;membrane;mitochondrion;nucleus	catalytic activity;protein binding;RNA binding	rno00010; rno00030; rno01230; rno01100; rno00051; rno04066; rno01200	12		1.67827e+08	1.61533e+08	1.59366e+08	1.82581e+08		-0.019488	0.176704	-0.196192		0.118333	1.4486	1.69093
High	P47819	24387	ENSRNOG00000002919.9	Gfap	Glial fibrillary acidic protein [OS=Rattus norvegicus]	0	56	22	2001	21	1	430	49.9	8603.25	22	[GO:0003774]; GO:0017111; GO:0016462; GO:0016818; GO:0016817; GO:0016787; GO:0003824; GO:0003674 [GO:0005178]; GO:0005102; GO:0032403; GO:0050839; GO:0005515; GO:0044877; GO:0005488; GO:0003674 [GO:0005198]; GO:0003674 [GO:0005200]; GO:0005198; GO:0003674 [GO:0005515]; GO:0005488; GO:0003674 [GO:0005622]; GO:0044464; GO:0005575; GO:0005623 [GO:0005737]; GO:0044424; GO:0005622; GO:0044464; GO:0005…	cell differentiation;cell organization and biogenesis;regulation of biological process;response to stimulus	cytoplasm;cytoskeleton;membrane	catalytic activity;motor activity;protein binding;structural molecule activity	rno04630	0		1.67678e+08	1.62216e+08	1.67418e+08	1.73399e+08		0.0455369	0.0961759	-0.050639		0.084481	0.16725	0.0943661
High	P00507	25721	ENSRNOG00000011782.6	Got2	Aspartate aminotransferase, mitochondrial [OS=Rattus norvegicus]	0	57	20	2222	20	1	430	47.3	9948.81	20	[GO:0003723]; GO:0003676; GO:0097159; GO:1901363; GO:0005488; GO:0003674 [GO:0003824]; GO:0003674 [GO:0004069]; GO:0008483; GO:0016769; GO:0016740; GO:0003824; GO:0003674 [GO:0005543]; GO:0008289; GO:0043168; GO:0005488; GO:0043167; GO:0003674 [GO:0005739]; GO:0043231; GO:0044444; GO:0043227; GO:0043229; GO:0005737; GO:0044424; GO:0043226; GO:0005622; GO:0044464; GO:0005575; GO:0005623 [GO:000574…	metabolic process;response to stimulus;transport	cell surface;membrane;mitochondrion;organelle lumen	catalytic activity;protein binding;RNA binding	rno00350; rno00330; rno00400; rno01210; rno04975; rno01230; rno01100; rno00270; rno00220; rno00250; rno00360; rno01200	0		1.64752e+08	1.67005e+08	1.62476e+08	1.64774e+08		-0.0396704	-0.0194009	-0.0202695		0.240201	0.0889234	0.108183
High	P07825	24804		Syp	Synaptophysin [OS=Rattus norvegicus]	0	55	9	1666	9	1	307	33.3	7792.25	9	[GO:0005215]; GO:0003674 [GO:0005515]; GO:0005488; GO:0003674 [GO:0006810]; GO:0051234; GO:0051179; GO:0008150 [GO:0006897]; GO:0016192; GO:0098657; GO:0006810; GO:0051234; GO:0051179; GO:0008150 [GO:0008021]; GO:0044456; GO:0070382; GO:0097458; GO:0098793; GO:0005575; GO:0045202; GO:0030133; GO:0099503; GO:0044464; GO:0012505; GO:0031410; GO:0005623; GO:0044444; GO:0097708; GO:0005737; GO:004442…	regulation of biological process;response to stimulus;transport	membrane	protein binding;transporter activity		0		1.64522e+08	1.62014e+08	1.66062e+08	1.65491e+08		0.0356038	0.0306326	0.00497118		0.219863	0.131956	0.0201461
High	Q9ER34	79250	ENSRNOG00000024128.6	Aco2	Aconitate hydratase, mitochondrial [OS=Rattus norvegicus]	0	49	26	2604	26	1	780	85.4	12816.8	26	[GO:0001889]; GO:0048732; GO:0061008; GO:0048513; GO:0048731; GO:0048856; GO:0007275; GO:0032502; GO:0032501; GO:0008150 [GO:0003994]; GO:0016836; GO:0016835; GO:0016829; GO:0003824; GO:0003674 [GO:0005506]; GO:0046914; GO:0046872; GO:0043169; GO:0043167; GO:0005488; GO:0003674 [GO:0005515]; GO:0005488; GO:0003674 [GO:0005739]; GO:0043231; GO:0044444; GO:0043227; GO:0043229; GO:0005737; GO:004442…	metabolic process;response to stimulus	mitochondrion	catalytic activity;metal ion binding;protein binding	rno01210; rno00020; rno01230; rno01100; rno00630; rno01200	0		1.64326e+08	1.65426e+08	1.61278e+08	1.66275e+08		-0.0366372	0.00738725	-0.0440244		0.256447	0.0415594	0.365373
High	P01830	24832	ENSRNOG00000006604.3	Thy1	Thy-1 membrane glycoprotein [OS=Rattus norvegicus]	0	25	4	760	4	1	161	18.2	3563.24	4	[GO:0001525]; GO:0048514; GO:0048646; GO:0001568; GO:0009653; GO:0032502; GO:0001944; GO:0048856; GO:0008150; GO:0048731; GO:0072358; GO:0007275; GO:0072359; GO:0032501 [GO:0001952]; GO:0007160; GO:0010810; GO:0031589; GO:0030155; GO:0007155; GO:0050789; GO:0022610; GO:0008150; GO:0065007 [GO:0002693]; GO:0002687; GO:0002691; GO:0045123; GO:0002684; GO:0002685; GO:0030335; GO:0050900; GO:0002376;…	cell communication;cell organization and biogenesis;metabolic process;regulation of biological process;response to stimulus	cell surface;cytosol;endoplasmic reticulum;membrane	DNA binding;enzyme regulator activity;protein binding	rno04670	0		1.6201e+08	1.57076e+08	1.6707e+08	1.61883e+08		0.0889922	0.0434904	0.0455018		0.485939	0.236888	0.214332
High	P13596-1	24586		Ncam1	Neural cell adhesion molecule 1 [OS=Rattus norvegicus]	0	48	30	3400	30	1	858	94.6	16315.4	30	[GO:0001928]; GO:0001927; GO:0017157; GO:0043254; GO:0106020; GO:0006904; GO:0043623; GO:0140029; GO:0006887; GO:0060627; GO:1903530; GO:0006461; GO:0044087; GO:0051128; GO:0048278; GO:0060341; GO:0034622; GO:0009987; GO:0016192; GO:0032940; GO:0050794; GO:0051049; GO:0051046; GO:0065003; GO:0070271; GO:0071822; GO:0044085; GO:0050789; GO:0016043; GO:0140056; GO:0032879; GO:0051641; GO:0008150; G…	cell organization and biogenesis;cellular component movement;regulation of biological process;response to stimulus	cell surface;cytosol;membrane	protein binding	rno05020; rno04514	0		1.59258e+08	1.5986e+08	1.57247e+08	1.60667e+08		-0.0237772	0.00726056	-0.0310378		0.330885	0.0706022	0.4617
High	P34926	25152		Map1a	Microtubule-associated protein 1A [OS=Rattus norvegicus]	0	47	85	4393	83	1	2774	299.3	19176.1	85	[GO:0000226]; GO:0007010; GO:0007017; GO:0006996; GO:0009987; GO:0016043; GO:0008150; GO:0071840 [GO:0001750]; GO:0044441; GO:0097458; GO:0097733; GO:0005929; GO:0044422; GO:0120038; GO:0044464; GO:0043005; GO:0097731; GO:0043226; GO:0120025; GO:0005575; GO:0044463; GO:0005623; GO:0097730; GO:0042995 [GO:0003779]; GO:0008092; GO:0005515; GO:0005488; GO:0003674 [GO:0005515]; GO:0005488; GO:0003674…	cell organization and biogenesis;regulation of biological process	cytoplasm;cytoskeleton;cytosol	protein binding		2		1.55713e+08	1.53832e+08	1.56852e+08	1.56454e+08		0.0280427	0.0243843	0.00365835		0.24509	0.219809	0.0269155
High	P11505-1	29598		Atp2b1	Plasma membrane calcium-transporting ATPase 1 [OS=Rattus norvegicus]	0	43	38	3579	1	1	1258	138.6	16744.6	38	[GO:0000166]; GO:0036094; GO:1901265; GO:0005488; GO:0097159; GO:1901363; GO:0003674 [GO:0003407]; GO:0048856; GO:0060041; GO:0032502; GO:0043010; GO:0008150; GO:0001654; GO:0007423; GO:0048513; GO:0048731; GO:0007275; GO:0032501 [GO:0005388]; GO:0015085; GO:0015662; GO:0019829; GO:0046873; GO:0072509; GO:0042625; GO:0008324; GO:0022890; GO:0022853; GO:0042626; GO:0015075; GO:0022804; GO:0015405;…	cell communication;cellular homeostasis;response to stimulus;transport	membrane;nucleus	catalytic activity;metal ion binding;nucleotide binding;protein binding;transporter activity	rno04978; rno04972; rno04020; rno04261; rno04961; rno04024; rno04970; rno04022	36		1.54537e+08	1.54211e+08	1.53837e+08	1.55563e+08		-0.0035056	0.012595	-0.0161006		0.0258835	0.0705584	0.0969775
High	Q63537-1	29179		Syn2	Synapsin-2 [OS=Rattus norvegicus]	0	54	18	6485	17	1	586	63.4	30442.7	18	[GO:0003824]; GO:0003674 [GO:0005515]; GO:0005488; GO:0003674 [GO:0005524]; GO:0032559; GO:0035639; GO:0030554; GO:0032555; GO:0043168; GO:1901265; GO:0017076; GO:0032553; GO:0043167; GO:0097159; GO:1901363; GO:0000166; GO:0097367; GO:0005488; GO:0036094; GO:0003674 [GO:0005886]; GO:0016020; GO:0044464; GO:0071944; GO:0005575; GO:0005623 [GO:0007269]; GO:0001505; GO:0006836; GO:0051649; GO:009953…	regulation of biological process;transport	membrane	catalytic activity;nucleotide binding;protein binding		0		1.44443e+08	1.44141e+08	1.52979e+08	1.36209e+08		0.0858582	-0.0816549	0.167513		0.906668	0.514092	1.54565
High	P10111	25518; 100360977	ENSRNOG00000027864.5; ENSRNOG00000055068.1	Ppia; LOC100360977	peptidyl-prolyl cis-trans isomerase A [OS=Rattus norvegicus]	0.006	47	9	422	9	1	164	17.9	1560.77	9	[GO:0000413]; GO:0018208; GO:0018193; GO:0006464; GO:0036211; GO:0044267; GO:0019538; GO:0043412; GO:0044260; GO:0043170; GO:0044238; GO:1901564; GO:0044237; GO:0071704; GO:0008152; GO:0006807; GO:0009987; GO:0008150 [GO:0003723]; GO:0003676; GO:0097159; GO:1901363; GO:0005488; GO:0003674 [GO:0003755]; GO:0016859; GO:0140096; GO:0016853; GO:0003824; GO:0003674 [GO:0005576]; GO:0005575 [GO:0005615…	cell differentiation;cell organization and biogenesis;metabolic process;regulation of biological process	cytoplasm;cytosol;extracellular;membrane;nucleus	catalytic activity;RNA binding		0		1.39231e+08	1.39377e+08	1.34404e+08	1.43912e+08		-0.0524174	0.0461887	-0.0986061		0.494402	0.377199	0.951854
High	P48500	24849; 100911515	ENSRNOG00000050669.2; ENSRNOG00000015290.6	Tpi1; LOC100911515	Triosephosphate isomerase [OS=Rattus norvegicus]	0	75	13	1720	13	1	249	26.8	7729.66	13	[GO:0003824]; GO:0003674 [GO:0004807]; GO:0016861; GO:0016860; GO:0016853; GO:0003824; GO:0003674 [GO:0005515]; GO:0005488; GO:0003674 [GO:0005615]; GO:0044421; GO:0005575; GO:0005576 [GO:0005634]; GO:0043231; GO:0043227; GO:0043229; GO:0043226; GO:0044424; GO:0005575; GO:0005622; GO:0044464; GO:0005623 [GO:0005829]; GO:0044444; GO:0005737; GO:0044424; GO:0005622; GO:0044464; GO:0005575; GO:00056…	development;metabolic process	cytosol;nucleus	catalytic activity;protein binding	rno00010; rno00562; rno01230; rno01100; rno00051; rno01200	0		1.35551e+08	1.31827e+08	1.31186e+08	1.43639e+08		-0.00702521	0.123807	-0.130832		0.0440955	0.939146	1.14181
High	Q68FY0	301011	ENSRNOG00000032134.4	Uqcrc1	Cytochrome b-c1 complex subunit 1, mitochondrial [OS=Rattus norvegicus]	0	44	11	2850	11	1	480	52.8	15293.5	11	[GO:0003824]; GO:0003674 [GO:0004222]; GO:0004175; GO:0008237; GO:0070011; GO:0008233; GO:0016787; GO:0140096; GO:0003824; GO:0003674 [GO:0005739]; GO:0043231; GO:0044444; GO:0043227; GO:0043229; GO:0005737; GO:0044424; GO:0043226; GO:0005622; GO:0044464; GO:0005575; GO:0005623 [GO:0005743]; GO:0019866; GO:0031966; GO:0031090; GO:0031967; GO:0044424; GO:0005740; GO:0044429; GO:0016020; GO:0043227…	metabolic process;response to stimulus;transport	cytosol;membrane;mitochondrion	catalytic activity;metal ion binding;protein binding	rno05010; rno00190; rno01100; rno05012; rno04932; rno04260; rno05016	0		1.32906e+08	1.33248e+08	1.42201e+08	1.2327e+08		0.0938135	-0.112297	0.20611		0.779125	0.625839	1.49025
High	P62632	24799	ENSRNOG00000012477.4	Eef1a2	Elongation factor 1-alpha 2 [OS=Rattus norvegicus]	0	60	15	1647	10	1	463	50.4	7372.92	15	[GO:0000166]; GO:0036094; GO:1901265; GO:0005488; GO:0097159; GO:1901363; GO:0003674 [GO:0003746]; GO:0008135; GO:0003723; GO:0003676; GO:0097159; GO:1901363; GO:0005488; GO:0003674 [GO:0003924]; GO:0017111; GO:0016462; GO:0016818; GO:0016817; GO:0016787; GO:0003824; GO:0003674 [GO:0005515]; GO:0005488; GO:0003674 [GO:0005525]; GO:0032550; GO:0032561; GO:0035639; GO:0001883; GO:0032549; GO:001900…	metabolic process;regulation of biological process;response to stimulus	cytoplasm;nucleus	catalytic activity;nucleotide binding;protein binding;RNA binding	rno05134; rno03013	5		1.32071e+08	1.28591e+08	1.31113e+08	1.3651e+08		0.0280256	0.0862188	-0.0581932		0.226959	0.820276	0.521799
High	P60881-1	25012		Snap25	Synaptosomal-associated protein 25 [OS=Rattus norvegicus]	0	62	14	1557	2	1	206	23.3	7697.13	14	[GO:0000149]; GO:0005515; GO:0005488; GO:0003674 [GO:0005249]; GO:0005267; GO:0022843; GO:0005261; GO:0015079; GO:0005244; GO:0005216; GO:0008324; GO:0015077; GO:0046873; GO:0022832; GO:0015075; GO:0022838; GO:0022890; GO:0022836; GO:0022891; GO:0015267; GO:0022857; GO:0022892; GO:0022803; GO:0005215; GO:0003674 [GO:0005484]; GO:0005515; GO:0005488; GO:0003674 [GO:0005515]; GO:0005488; GO:0003674…	cell differentiation;cell organization and biogenesis;regulation of biological process;response to stimulus;transport	cytoplasm;cytoskeleton;cytosol;endosome;membrane	protein binding;transporter activity	rno04721; rno04911	12		1.30625e+08	1.29582e+08	1.25579e+08	1.36714e+08		-0.0452744	0.0772924	-0.122567		0.433694	0.733376	1.47226
High	P32551	293448	ENSRNOG00000036742.3	Uqcrc2	Cytochrome b-c1 complex subunit 2, mitochondrial [OS=Rattus norvegicus]	0	78	20	1896	20	1	452	48.4	8251.23	20	[GO:0003824]; GO:0003674 [GO:0004222]; GO:0004175; GO:0008237; GO:0070011; GO:0008233; GO:0016787; GO:0140096; GO:0003824; GO:0003674 [GO:0005654]; GO:0031981; GO:0044428; GO:0070013; GO:0005634; GO:0044446; GO:0043229; GO:0043233; GO:0044424; GO:0043231; GO:0044422; GO:0043226; GO:0031974; GO:0005622; GO:0044464; GO:0043227; GO:0005575; GO:0005623 [GO:0005739]; GO:0043231; GO:0044444; GO:0043227…	metabolic process;transport	membrane;mitochondrion	catalytic activity;metal ion binding;protein binding	rno05010; rno00190; rno01100; rno05012; rno04932; rno04260; rno05016	0		1.29555e+08	1.27832e+08	1.41865e+08	1.18968e+08		0.15027	-0.103679	0.25395		1.59832	0.659498	2.35165
High	P62804	500351; 680097; 100912564; 100912489; 64627; 100360950; 100912290; 679983; 502913; 291152; 295277; 102551184; 102548682; 102557184; 364723	ENSRNOG00000045978.1; ENSRNOG00000051891.1; ENSRNOG00000048642.1; ENSRNOG00000046636.1; ENSRNOG00000054017.1; ENSRNOG00000058444.1; ENSRNOG00000048215.1; ENSRNOG00000048735.1; ENSRNOG00000057690.1; ENSRNOG00000045840.1; ENSRNOG00000032224.4; ENSRNOG00000050933.1	LOC100912418; RGD1562378; LOC680097; Hist4h4; LOC100912564; LOC100912489; Hist1h4b; LOC100360950; LOC680430; LOC100912290; LOC679983; Hist1h4a; Hist2h4a; Hist1h4m; Hist2h4; LOC102551184; LOC102548682; LOC102557184; Hist1h2ao	histone H4 [OS=Rattus norvegicus]	0.006	64	7	451	7	1	103	11.4	1700.35	7	[GO:0000122]; GO:0006357; GO:0006366; GO:0045892; GO:0006355; GO:0006351; GO:0010629; GO:1903507; GO:2000113; GO:0010468; GO:1903506; GO:2000112; GO:0010467; GO:0034645; GO:0097659; GO:0010605; GO:1902679; GO:0010558; GO:0031327; GO:0060255; GO:2001141; GO:0010556; GO:0031326; GO:0043170; GO:0009059; GO:0044249; GO:0044260; GO:0032774; GO:0009892; GO:0051253; GO:0009890; GO:0031324; GO:0019222; G…	cell differentiation;cell organization and biogenesis;development;metabolic process;regulation of biological process	chromosome;membrane;nucleus	DNA binding;protein binding;RNA binding	rno05034; rno05203; rno05322	0		1.29137e+08	1.27115e+08	1.48221e+08	1.12076e+08		0.221617	-0.181657	0.403275		0.360923	0.230617	0.936169
High	P23565	24503		Ina	alpha-internexin [OS=Rattus norvegicus]	0	55	23	2894	20	1	505	56.1	13645.4	23	[GO:0005198]; GO:0003674 [GO:0005515]; GO:0005488; GO:0003674 [GO:0005615]; GO:0044421; GO:0005575; GO:0005576 [GO:0005654]; GO:0031981; GO:0044428; GO:0070013; GO:0005634; GO:0044446; GO:0043229; GO:0043233; GO:0044424; GO:0043231; GO:0044422; GO:0043226; GO:0031974; GO:0005622; GO:0044464; GO:0043227; GO:0005575; GO:0005623 [GO:0005882]; GO:0045111; GO:0099513; GO:0005856; GO:0044430; GO:009951…	cell differentiation;cell organization and biogenesis;development;regulation of biological process	cytoskeleton;membrane	protein binding;structural molecule activity		0		1.22948e+08	1.16122e+08	1.26748e+08	1.25974e+08		0.126319	0.117487	0.00883244		0.620148	0.32208	0.0198174
High	P63039	63868	ENSRNOG00000014525.5	Hspd1	60 kDa heat shock protein, mitochondrial [OS=Rattus norvegicus]	0	66	31	4753	31	1	573	60.9	24369.3	31	[GO:0000166]; GO:0036094; GO:1901265; GO:0005488; GO:0097159; GO:1901363; GO:0003674 [GO:0001530]; GO:0008289; GO:0097367; GO:0005488; GO:0003674 [GO:0001666]; GO:0006950; GO:0036293; GO:0050896; GO:0070482; GO:0008150; GO:0009628 [GO:0002020]; GO:0019899; GO:0005515; GO:0005488; GO:0003674 [GO:0002039]; GO:0005515; GO:0005488; GO:0003674 [GO:0002236]; GO:0009593; GO:0051788; GO:0042221; GO:00516…	cell organization and biogenesis;cell proliferation;metabolic process;regulation of biological process;response to stimulus;transport	cell surface;cytoplasm;cytosol;endoplasmic reticulum;endosome;Golgi;membrane;mitochondrion;organelle lumen	catalytic activity;nucleotide binding;protein binding;RNA binding	rno04940; rno05134; rno05152; rno03018	0		1.22416e+08	1.21181e+08	1.23439e+08	1.22627e+08		0.0266382	0.0171198	0.00951837		0.244742	0.113258	0.0696582
High	O88989	24551	ENSRNOG00000008103.7	Mdh1	Malate dehydrogenase, cytoplasmic [OS=Rattus norvegicus]	0	56	12	1372	12	1	334	36.5	5980.05	12	[GO:0003824]; GO:0003674 [GO:0005615]; GO:0044421; GO:0005575; GO:0005576 [GO:0005737]; GO:0044424; GO:0005622; GO:0044464; GO:0005575; GO:0005623 [GO:0005739]; GO:0043231; GO:0044444; GO:0043227; GO:0043229; GO:0005737; GO:0044424; GO:0043226; GO:0005622; GO:0044464; GO:0005575; GO:0005623 [GO:0005829]; GO:0044444; GO:0005737; GO:0044424; GO:0005622; GO:0044464; GO:0005575; GO:0005623 [GO:000597…	metabolic process	cytoplasm;cytosol;mitochondrion	catalytic activity;nucleotide binding	rno04964; rno00020; rno01100; rno00270; rno00620; rno00630; rno01200	0		1.22254e+08	1.17563e+08	1.17752e+08	1.31447e+08		0.00232334	0.161044	-0.158721		0.0111516	0.943785	0.945412
High	P24942	29483		Slc1a3	Excitatory amino acid transporter 1 [OS=Rattus norvegicus]	0	38	14	1697	14	1	543	59.7	9174.95	14	[GO:0005313]; GO:0005310; GO:0015172; GO:0015179; GO:0046943; GO:0015171; GO:0005342; GO:0008514; GO:0022891; GO:0008509; GO:0022857; GO:0022892; GO:0015075; GO:0005215; GO:0003674 [GO:0005314]; GO:0005313; GO:0015370; GO:0005310; GO:0015172; GO:0015179; GO:0015081; GO:0015294; GO:0046943; GO:0015171; GO:0015077; GO:0046873; GO:0008324; GO:0015293; GO:0005342; GO:0008514; GO:0022890; GO:0015075; …	cell organization and biogenesis;metabolic process;regulation of biological process;response to stimulus;transport	cell surface;membrane	metal ion binding;transporter activity	rno04724	0		1.22187e+08	1.25021e+08	1.2443e+08	1.17111e+08		-0.00683375	-0.0942871	0.0874534		0.034047	0.776184	0.609117
High	Q00981	29545	ENSRNOG00000002343.7	Uchl1	Ubiquitin carboxyl-terminal hydrolase isozyme L1 [OS=Rattus norvegicus]	0	68	9	1053	9	1	223	24.8	5283.62	9	[GO:0002931]; GO:0006950; GO:0050896; GO:0008150 [GO:0004197]; GO:0004175; GO:0008234; GO:0070011; GO:0008233; GO:0016787; GO:0140096; GO:0003824; GO:0003674 [GO:0004843]; GO:0036459; GO:0019783; GO:0101005; GO:0008234; GO:0016787; GO:0140096; GO:0070011; GO:0003824; GO:0008233; GO:0003674 [GO:0005622]; GO:0044464; GO:0005575; GO:0005623 [GO:0005654]; GO:0031981; GO:0044428; GO:0070013; GO:000563…	cell communication;cell organization and biogenesis;cell proliferation;cellular component movement;metabolic process;regulation of biological process;response to stimulus;transport	cytoplasm;cytosol;endoplasmic reticulum;membrane	catalytic activity;protein binding	rno05012	0		1.21923e+08	1.18561e+08	1.13771e+08	1.33437e+08		-0.0595048	0.170526	-0.230031		0.473949	1.09294	1.74319
High	P62815	117596	ENSRNOG00000011891.6	Atp6v1b2	V-type proton ATPase subunit B, brain isoform [OS=Rattus norvegicus]	0	71	28	3989	28	1	511	56.5	20244.6	28	[GO:0001726]; GO:0031252; GO:0120025; GO:0044464; GO:0042995; GO:0005575; GO:0005623 [GO:0005524]; GO:0032559; GO:0035639; GO:0030554; GO:0032555; GO:0043168; GO:1901265; GO:0017076; GO:0032553; GO:0043167; GO:0097159; GO:1901363; GO:0000166; GO:0097367; GO:0005488; GO:0036094; GO:0003674 [GO:0005737]; GO:0044424; GO:0005622; GO:0044464; GO:0005575; GO:0005623 [GO:0005765]; GO:0005764; GO:0098852…	cellular homeostasis;metabolic process;transport	cytoplasm;cytosol;membrane	catalytic activity;nucleotide binding;transporter activity	rno04721; rno00190; rno05323; rno01100; rno04966; rno04150; rno04145	0		1.20367e+08	1.19334e+08	1.20394e+08	1.21374e+08		0.0127662	0.0244548	-0.0116885		0.0847945	0.162834	0.0741314
High	Q4QRB4	246118	ENSRNOG00000017209.6	Tubb3	tubulin beta-3 chain [OS=Rattus norvegicus]	0	80	24	6833	13	1	450	50.4	31537.1	24	[GO:0000166]; GO:0036094; GO:1901265; GO:0005488; GO:0097159; GO:1901363; GO:0003674 [GO:0000278]; GO:0007049; GO:0009987; GO:0008150 [GO:0003924]; GO:0017111; GO:0016462; GO:0016818; GO:0016817; GO:0016787; GO:0003824; GO:0003674 [GO:0005200]; GO:0005198; GO:0003674 [GO:0005525]; GO:0032550; GO:0032561; GO:0035639; GO:0001883; GO:0032549; GO:0019001; GO:0032555; GO:0043168; GO:1901265; GO:000188…	cell differentiation;cell organization and biogenesis;cellular component movement	cytoplasm;cytoskeleton;nucleus	catalytic activity;nucleotide binding;structural molecule activity	rno04540; rno04145	0		1.18796e+08	1.20512e+08	1.14146e+08	1.2173e+08		-0.0782931	0.0145037	-0.0927968		0.694564	0.112977	0.871566
High	P25286	29757		Atp6v0a1	V-type proton ATPase 116 kDa subunit a isoform 1 [OS=Rattus norvegicus]	0	36	24	1924	24	1	838	96.3	8641.87	24	[GO:0000220]; GO:0016471; GO:0033179; GO:0044437; GO:0005774; GO:0033176; GO:0033177; GO:0005773; GO:0044444; GO:0044446; GO:0098588; GO:0098805; GO:0016469; GO:0098796; GO:0043231; GO:0005737; GO:0044424; GO:0043229; GO:0044422; GO:0031090; GO:0016020; GO:0043234; GO:0044425; GO:0043227; GO:0005622; GO:0044464; GO:0043226; GO:0005575; GO:0032991; GO:0005623 [GO:0003674] [GO:0005575] [GO:0005737]…	cell organization and biogenesis;cellular homeostasis;metabolic process;regulation of biological process;transport	cytoplasm;cytosol;Golgi;membrane	catalytic activity;protein binding;transporter activity	rno04721; rno05152; rno00190; rno05323; rno01100; rno04966; rno04142; rno04145	0		1.18671e+08	1.17167e+08	1.21155e+08	1.17691e+08		0.0482871	0.00643539	0.0418517		0.372931	0.028857	0.24376
High	P38650	29489		Dync1h1	Cytoplasmic dynein 1 heavy chain 1 [OS=Rattus norvegicus]	0	44	141	5735	141	1	4644	531.9	26303.5	141	[GO:0000166]; GO:0036094; GO:1901265; GO:0005488; GO:0097159; GO:1901363; GO:0003674 [GO:0002177]; GO:0015630; GO:0044430; GO:0005856; GO:0044446; GO:0043232; GO:0043229; GO:0044422; GO:0044424; GO:0043228; GO:0043226; GO:0005575; GO:0005622; GO:0044464; GO:0005623 [GO:0003674] [GO:0003723]; GO:0003676; GO:0097159; GO:1901363; GO:0005488; GO:0003674 [GO:0003774]; GO:0017111; GO:0016462; GO:001681…	cell division;cell organization and biogenesis;cellular component movement;regulation of biological process;response to stimulus;transport	cytoplasm;cytoskeleton;membrane	catalytic activity;motor activity;nucleotide binding;protein binding;RNA binding	rno04962; rno05132; rno04145	0		1.17558e+08	1.17157e+08	1.19579e+08	1.15938e+08		0.0295207	-0.0150945	0.0446152		0.383087	0.141127	0.446433
High	Q63198	117258	ENSRNOG00000004438.4	Cntn1	Contactin-1 [OS=Rattus norvegicus]	0	48	35	3161	35	1	1021	113.4	14548.9	35	[GO:0005515]; GO:0005488; GO:0003674 [GO:0005886]; GO:0016020; GO:0044464; GO:0071944; GO:0005575; GO:0005623 [GO:0007155]; GO:0022610; GO:0008150 [GO:0007219]; GO:0007166; GO:0007165; GO:0007154; GO:0009987; GO:0023052; GO:0050794; GO:0051716; GO:0008150; GO:0050789; GO:0050896; GO:0065007 [GO:0007399]; GO:0048731; GO:0007275; GO:0048856; GO:0032501; GO:0032502; GO:0008150 [GO:0010628]; GO:00104…	cell organization and biogenesis;regulation of biological process;response to stimulus	membrane	protein binding	rno04514	0		1.14208e+08	1.14208e+08	1.13772e+08	1.14644e+08		-0.00551079	0.00549645	-0.0110072		0.0547892	0.0516254	0.1618
High	P61983	56010	ENSRNOG00000001436.5	Ywhag	14-3-3 protein gamma [OS=Rattus norvegicus]	0	69	14	2499	12	1	247	28.3	12126.7	14	[GO:0003723]; GO:0003676; GO:0097159; GO:1901363; GO:0005488; GO:0003674 [GO:0003779]; GO:0008092; GO:0005515; GO:0005488; GO:0003674 [GO:0005080]; GO:0019901; GO:0019900; GO:0019899; GO:0005515; GO:0005488; GO:0003674 [GO:0005159]; GO:0005102; GO:0005515; GO:0005488; GO:0003674 [GO:0005515]; GO:0005488; GO:0003674 [GO:0005737]; GO:0044424; GO:0005622; GO:0044464; GO:0005575; GO:0005623 [GO:00059…	regulation of biological process;response to stimulus;transport	cytoplasm;membrane	enzyme regulator activity;protein binding;RNA binding	rno05203; rno05169; rno04151; rno04110; rno04114; rno04390	1		1.14121e+08	1.09168e+08	1.12289e+08	1.20907e+08		0.0406602	0.147343	-0.106683		0.169389	0.68739	0.49532
High	P45592	29271	ENSRNOG00000020660.7	Cfl1	Cofilin-1 [OS=Rattus norvegicus]	0	66	13	1805	13	1	166	18.5	9406.3	13	[GO:0000281]; GO:0061640; GO:1903047; GO:0000910; GO:0000278; GO:0022402; GO:0051301; GO:0007049; GO:0009987; GO:0008150 [GO:0001755]; GO:0001667; GO:0014032; GO:0016477; GO:0014031; GO:0014033; GO:0048864; GO:0048870; GO:0048468; GO:0048762; GO:0048863; GO:0006928; GO:0040011; GO:0051674; GO:0030154; GO:0048856; GO:0048869; GO:0060485; GO:0009987; GO:0008150; GO:0051179; GO:0032502; GO:0009888; …	cell organization and biogenesis;cellular component movement;metabolic process;regulation of biological process;response to stimulus;transport	cytoplasm;cytoskeleton;membrane;nucleus	protein binding	rno04360; rno05133; rno04666; rno04810	0		1.1205e+08	1.10048e+08	1.08984e+08	1.17117e+08		-0.0140183	0.089808	-0.103826		0.127449	1.0047	1.24195
High	P25809	29593		Ckmt1b; Ckmt1	Creatine kinase U-type, mitochondrial [OS=Rattus norvegicus]	0	44	13	1367	13	1	418	47	7048.57	13	[GO:0000166]; GO:0036094; GO:1901265; GO:0005488; GO:0097159; GO:1901363; GO:0003674 [GO:0001822]; GO:0048513; GO:0072001; GO:0048731; GO:0048856; GO:0001655; GO:0007275; GO:0032502; GO:0032501; GO:0008150 [GO:0003824]; GO:0003674 [GO:0004111]; GO:0016301; GO:0016775; GO:0016772; GO:0016740; GO:0003824; GO:0003674 [GO:0005524]; GO:0032559; GO:0035639; GO:0030554; GO:0032555; GO:0043168; GO:190126…	metabolic process;regulation of biological process	membrane;mitochondrion	catalytic activity;nucleotide binding;protein binding		0		1.11488e+08	1.13711e+08	1.09589e+08	1.11164e+08		-0.053272	-0.0326888	-0.0205832		0.64757	0.280216	0.148994
High	P25113	24642	ENSRNOG00000050585.2	Pgam1	Phosphoglycerate mutase 1 [OS=Rattus norvegicus]	0	78	18	2307	18	1	254	28.8	10719.8	18	[GO:0003824]; GO:0003674 [GO:0004082]; GO:0016868; GO:0016866; GO:0016853; GO:0003824; GO:0003674 [GO:0004619]; GO:0016868; GO:0016866; GO:0016853; GO:0003824; GO:0003674 [GO:0005634]; GO:0043231; GO:0043227; GO:0043229; GO:0043226; GO:0044424; GO:0005575; GO:0005622; GO:0044464; GO:0005623 [GO:0005737]; GO:0044424; GO:0005622; GO:0044464; GO:0005575; GO:0005623 [GO:0005829]; GO:0044444; GO:00057…	metabolic process;regulation of biological process	cytoplasm;cytosol;membrane;nucleus	catalytic activity;protein binding	rno00010; rno05230; rno01230; rno01100; rno00260; rno04922; rno01200	0		1.10053e+08	1.06362e+08	1.04879e+08	1.18919e+08		-0.020259	0.160988	-0.181247		0.113456	0.886658	1.1805
High	P63329-1	24674	ENSRNOG00000009882.7	Ppp3ca	Serine/threonine-protein phosphatase 2B catalytic subunit alpha isoform [OS=Rattus norvegicus]	0	70	22	1462	14	1	521	58.6	6712.42	22	[GO:0000082]; GO:0044772; GO:0044843; GO:0044770; GO:1903047; GO:0022402; GO:0000278; GO:0007049; GO:0009987; GO:0008150 [GO:0000086]; GO:0044772; GO:0044839; GO:0044770; GO:1903047; GO:0022402; GO:0000278; GO:0007049; GO:0009987; GO:0008150 [GO:0000922]; GO:0005819; GO:0044430; GO:0015630; GO:0043232; GO:0005856; GO:0044446; GO:0043228; GO:0043229; GO:0044422; GO:0044424; GO:0043226; GO:0005575;…	cell differentiation;cell organization and biogenesis;cellular homeostasis;metabolic process;regulation of biological process;response to stimulus;transport	cytoplasm;cytoskeleton;cytosol;membrane;mitochondrion;nucleus	catalytic activity;enzyme regulator activity;metal ion binding;protein binding	rno04921; rno04010; rno04020; rno04662; rno05010; rno04360; rno04370; rno05152; rno04660; rno04650; rno04724; rno04924; rno04114; rno05014; rno04922; rno05031; rno04380; rno05166; rno04022; rno04658; rno04720; rno04728; rno04310	8		1.0894e+08	1.07279e+08	1.11782e+08	1.07758e+08		0.059314	0.00642867	0.0528853		0.536059	0.0306649	0.335048
High	P35435	116550		Atp5c1	ATP synthase subunit gamma, mitochondrial [OS=Rattus norvegicus]	0	50	10	1290	10	1	273	30.2	5754.42	10	[GO:0000275]; GO:0005753; GO:0045261; GO:0098800; GO:0045259; GO:0033178; GO:0044424; GO:0005743; GO:0044455; GO:0098796; GO:0098798; GO:0016469; GO:0005622; GO:0044464; GO:0019866; GO:0031966; GO:0044425; GO:0044429; GO:0043234; GO:0005575; GO:0005623; GO:0031090; GO:0031967; GO:0005740; GO:0016020; GO:0005739; GO:0044444; GO:0044446; GO:0032991; GO:0043227; GO:0044422; GO:0031975; GO:0043231; G…	metabolic process;transport	membrane;mitochondrion	catalytic activity;RNA binding;transporter activity		0		1.08554e+08	1.07198e+08	1.18224e+08	1.00241e+08		0.141237	-0.0968095	0.238047		1.19101	0.582978	1.95864
High	P18484	81637		Ap2a2	AP-2 complex subunit alpha-2 [OS=Rattus norvegicus]	0	46	30	2487	30	1	938	104	11025.6	30	[GO:0005488]; GO:0003674 [GO:0005515]; GO:0005488; GO:0003674 [GO:0005575] [GO:0005794]; GO:0012505; GO:0043231; GO:0044444; GO:0044464; GO:0043227; GO:0043229; GO:0005737; GO:0044424; GO:0005575; GO:0005623; GO:0043226; GO:0005622 [GO:0005886]; GO:0016020; GO:0044464; GO:0071944; GO:0005575; GO:0005623 [GO:0005905]; GO:0012505; GO:0044464; GO:0098589; GO:0005575; GO:0005623; GO:0016020; GO:00444…	transport	Golgi;membrane	protein binding;transporter activity		0		1.08257e+08	1.08578e+08	1.10883e+08	1.05308e+08		0.0303074	-0.0441227	0.0744301		0.30331	0.413794	0.770939
High	P06685	24211	ENSRNOG00000030019.4	Atp1a1	Sodium/potassium-transporting ATPase subunit alpha-1 [OS=Rattus norvegicus]	0	44	38	8122	23	1	1023	113	40482.3	38	[GO:0000166]; GO:0036094; GO:1901265; GO:0005488; GO:0097159; GO:1901363; GO:0003674 [GO:0002026]; GO:0008016; GO:0065008; GO:0060047; GO:1903522; GO:0065007; GO:0003015; GO:0008015; GO:0044057; GO:0008150; GO:0003013; GO:0003008; GO:0051239; GO:0032501; GO:0050789 [GO:0002028]; GO:0006814; GO:0010959; GO:0015672; GO:0030001; GO:0043269; GO:0006812; GO:0006811; GO:0051049; GO:0006810; GO:0032879;…	cellular homeostasis;metabolic process;regulation of biological process;response to stimulus;transport	endoplasmic reticulum;endosome;Golgi;membrane	catalytic activity;metal ion binding;nucleotide binding;protein binding;transporter activity	rno04978; rno04972; rno04964; rno04261; rno04961; rno04960; rno04024; rno04918; rno04974; rno04973; rno04971; rno04970; rno04260; rno04976; rno04911; rno04022; rno04919	0		1.07411e+08	1.08789e+08	1.04632e+08	1.0881e+08		-0.0562068	0.000277923	-0.0564847		0.497671	0.00135529	0.409876
High	P04764	24333	ENSRNOG00000017895.7	Eno1	alpha-enolase [OS=Rattus norvegicus]	0	56	16	5760	10	1	434	47.1	29327.8	16	[GO:0000015]; GO:0044445; GO:1902494; GO:0005829; GO:0044444; GO:0032991; GO:0005737; GO:0044424; GO:0005575; GO:0005622; GO:0044464; GO:0005623 [GO:0000122]; GO:0006357; GO:0006366; GO:0045892; GO:0006355; GO:0006351; GO:0010629; GO:1903507; GO:2000113; GO:0010468; GO:1903506; GO:2000112; GO:0010467; GO:0034645; GO:0097659; GO:0010605; GO:1902679; GO:0010558; GO:0031327; GO:0060255; GO:2001141; …	cell organization and biogenesis;metabolic process;regulation of biological process;response to stimulus	cell surface;cytoplasm;cytosol;membrane;nucleus	catalytic activity;DNA binding;metal ion binding;protein binding;RNA binding	rno00010; rno01230; rno01100; rno03018; rno04066; rno01200	1		1.0312e+08	1.01049e+08	9.92343e+07	1.09076e+08		-0.0261492	0.11027	-0.136419		0.166479	0.844595	1.29891
High	P42123	24534	ENSRNOG00000013000.7	Ldhb	L-lactate dehydrogenase B chain [OS=Rattus norvegicus]	0	64	17	2588	16	1	334	36.6	12107	17	[GO:0003824]; GO:0003674 [GO:0004457]; GO:0016614; GO:0016491; GO:0003824; GO:0003674 [GO:0004459]; GO:0004457; GO:0016616; GO:0016614; GO:0016491; GO:0003824; GO:0003674 [GO:0005515]; GO:0005488; GO:0003674 [GO:0005737]; GO:0044424; GO:0005622; GO:0044464; GO:0005575; GO:0005623 [GO:0005739]; GO:0043231; GO:0044444; GO:0043227; GO:0043229; GO:0005737; GO:0044424; GO:0043226; GO:0005622; GO:00444…	metabolic process	cytoplasm;cytosol;membrane;mitochondrion	catalytic activity;nucleotide binding;protein binding	rno00010; rno01100; rno00270; rno00620; rno00640; rno04922	0		1.02328e+08	9.59355e+07	9.36659e+07	1.17383e+08		-0.0345409	0.291088	-0.325628		0.181084	1.41717	1.74988
High	P81155	83531	ENSRNOG00000013505.6	Vdac2	Voltage-dependent anion-selective channel protein 2 [OS=Rattus norvegicus]	0	52	10	1130	9	1	295	31.7	5307.91	10	[GO:0000166]; GO:0036094; GO:1901265; GO:0005488; GO:0097159; GO:1901363; GO:0003674 [GO:0001669]; GO:0030141; GO:0097223; GO:0012505; GO:0099503; GO:0044464; GO:0031410; GO:0005575; GO:0005623; GO:0044444; GO:0097708; GO:0005737; GO:0044424; GO:0031982; GO:0043229; GO:0005622; GO:0043227; GO:0043226 [GO:0003674] [GO:0005634]; GO:0043231; GO:0043227; GO:0043229; GO:0043226; GO:0044424; GO:0005575…	regulation of biological process;transport	membrane;mitochondrion;nucleus	nucleotide binding;transporter activity	rno04020; rno05012; rno05166; rno04022; rno05016; rno04621	1		1.0178e+08	9.94936e+07	1.07669e+08	9.81767e+07		0.113931	-0.0192233	0.133154		1.33655	0.120536	2.03808
High	P11517	100134871; 689064; 103694857	ENSRNOG00000054582.1; ENSRNOG00000047098.2; ENSRNOG00000061299.1	LOC100134871; LOC689064; LOC103694857	Hemoglobin subunit beta-2 [OS=Rattus norvegicus]	0.006	72	9	414	2	1	147	16	1760.56	9	[GO:0005344]; GO:0005215; GO:0140104; GO:0003674 [GO:0005506]; GO:0046914; GO:0046872; GO:0043169; GO:0043167; GO:0005488; GO:0003674 [GO:0005833]; GO:0043234; GO:0044445; GO:0032991; GO:0005829; GO:0044444; GO:0005575; GO:0005737; GO:0044424; GO:0005622; GO:0044464; GO:0005623 [GO:0006810]; GO:0051234; GO:0051179; GO:0008150 [GO:0015671]; GO:0015669; GO:0006810; GO:0051234; GO:0051179; GO:000815…	transport		metal ion binding;transporter activity	rno05144; rno05143	6		9.93441e+07	9.67088e+07	8.70697e+07	1.14254e+08		-0.151476	0.240525	-0.392001		0.599622	0.661188	1.30121
High	P16617	24644	ENSRNOG00000058249.1	Pgk1	phosphoglycerate kinase 1 [OS=Rattus norvegicus]	0	63	20	2129	20	1	417	44.5	10250.9	20	[GO:0000166]; GO:0036094; GO:1901265; GO:0005488; GO:0097159; GO:1901363; GO:0003674 [GO:0004618]; GO:0016301; GO:0016774; GO:0016772; GO:0016740; GO:0003824; GO:0003674 [GO:0005524]; GO:0032559; GO:0035639; GO:0030554; GO:0032555; GO:0043168; GO:1901265; GO:0017076; GO:0032553; GO:0043167; GO:0097159; GO:1901363; GO:0000166; GO:0097367; GO:0005488; GO:0036094; GO:0003674 [GO:0005615]; GO:0044421…	cell differentiation;metabolic process;regulation of biological process;response to stimulus	cytoplasm;cytosol;membrane	catalytic activity;nucleotide binding	rno00010; rno01230; rno01100; rno04066; rno01200	0		9.78675e+07	9.55092e+07	9.19052e+07	1.06188e+08		-0.0554938	0.15291	-0.208404		0.509563	1.03815	1.61169
High	P54311	24400	ENSRNOG00000016638.5	Gnb1	Guanine nucleotide-binding protein G(I)/G(S)/G(T) subunit beta-1 [OS=Rattus norvegicus]	0	54	12	2961	6	1	340	37.4	15366.8	12	[GO:0001664]; GO:0005102; GO:0005515; GO:0005488; GO:0003674 [GO:0001750]; GO:0044441; GO:0097458; GO:0097733; GO:0005929; GO:0044422; GO:0120038; GO:0044464; GO:0043005; GO:0097731; GO:0043226; GO:0120025; GO:0005575; GO:0044463; GO:0005623; GO:0097730; GO:0042995 [GO:0001917]; GO:0097458; GO:0044464; GO:0005575; GO:0005623 [GO:0003924]; GO:0017111; GO:0016462; GO:0016818; GO:0016817; GO:0016787…	cell death;cell organization and biogenesis;cell proliferation;cellular homeostasis;regulation of biological process;response to stimulus	membrane	catalytic activity;protein binding;signal transducer activity	rno05034; rno05032; rno04723; rno04724; rno04740; rno04151; rno04725; rno05200; rno04014; rno04727; rno04744; rno04713; rno04726; rno04062; rno04728	1		9.65696e+07	9.64323e+07	9.5492e+07	9.77846e+07		-0.0141355	0.0200909	-0.0342264		0.116581	0.145668	0.292392
High	P15205	29456		Map1b	microtubule-associated protein 1B [OS=Rattus norvegicus]	0	40	59	3705	57	1	2459	269.3	16762.8	59	[GO:0000226]; GO:0007010; GO:0007017; GO:0006996; GO:0009987; GO:0016043; GO:0008150; GO:0071840 [GO:0001578]; GO:0000226; GO:0007010; GO:0007017; GO:0006996; GO:0009987; GO:0016043; GO:0008150; GO:0071840 [GO:0001750]; GO:0044441; GO:0097458; GO:0097733; GO:0005929; GO:0044422; GO:0120038; GO:0044464; GO:0043005; GO:0097731; GO:0043226; GO:0120025; GO:0005575; GO:0044463; GO:0005623; GO:0097730;…	cell growth;cell organization and biogenesis;cellular component movement;regulation of biological process;response to stimulus;transport	cytoplasm;cytoskeleton;cytosol;membrane	protein binding		0		9.61865e+07	9.62834e+07	9.84076e+07	9.38686e+07		0.0314817	-0.0366444	0.0681261		0.307513	0.454217	0.817959
High	Q66HF1	301458	ENSRNOG00000011849.6	Ndufs1	NADH-ubiquinone oxidoreductase 75 kDa subunit, mitochondrial [OS=Rattus norvegicus]	0	61	28	2179	28	1	727	79.4	10132.9	28	[GO:0003674] [GO:0003954]; GO:0016651; GO:0016491; GO:0003824; GO:0003674 [GO:0005575] [GO:0005739]; GO:0043231; GO:0044444; GO:0043227; GO:0043229; GO:0005737; GO:0044424; GO:0043226; GO:0005622; GO:0044464; GO:0005575; GO:0005623 [GO:0005743]; GO:0019866; GO:0031966; GO:0031090; GO:0031967; GO:0044424; GO:0005740; GO:0044429; GO:0016020; GO:0043227; GO:0044422; GO:0031975; GO:0044446; GO:000562…	cell organization and biogenesis;metabolic process;transport	membrane;mitochondrion	catalytic activity;metal ion binding	rno05010; rno00190; rno01100; rno05012; rno04932; rno05016	0		9.57556e+07	9.56977e+07	1.02324e+08	8.92452e+07		0.0965872	-0.100709	0.197296		0.647957	0.456302	1.21424
High	P19527	83613	ENSRNOG00000013658.3	Nefl	Neurofilament light polypeptide [OS=Rattus norvegicus]	0	66	32	2215	30	1	542	61.3	10877.5	32	[GO:0000226]; GO:0007010; GO:0007017; GO:0006996; GO:0009987; GO:0016043; GO:0008150; GO:0071840 [GO:0003774]; GO:0017111; GO:0016462; GO:0016818; GO:0016817; GO:0016787; GO:0003824; GO:0003674 [GO:0005198]; GO:0003674 [GO:0005200]; GO:0005198; GO:0003674 [GO:0005737]; GO:0044424; GO:0005622; GO:0044464; GO:0005575; GO:0005623 [GO:0005882]; GO:0045111; GO:0099513; GO:0005856; GO:0044430; GO:00995…	cell organization and biogenesis;cellular component movement;regulation of biological process;response to stimulus;transport	cytoplasm	catalytic activity;motor activity;protein binding;structural molecule activity	rno05014	0		9.54552e+07	8.82308e+07	9.68203e+07	1.01314e+08		0.134026	0.199486	-0.0654595		0.677317	0.530419	0.140864
High	P31399	641434	ENSRNOG00000003626.6	Atp5h	ATP synthase subunit d, mitochondrial [OS=Rattus norvegicus]	0	66	9	1294	9	1	161	18.8	5796.39	9	[GO:0000274]; GO:0000276; GO:0045265; GO:0098800; GO:0005753; GO:0045263; GO:0044424; GO:0098796; GO:0005743; GO:0044455; GO:0098798; GO:0045259; GO:0033177; GO:0005622; GO:0044464; GO:0043234; GO:0044425; GO:0019866; GO:0031966; GO:0044429; GO:0016469; GO:0005575; GO:0005623; GO:0032991; GO:0016020; GO:0031090; GO:0031967; GO:0005740; GO:0005739; GO:0044444; GO:0044446; GO:0043227; GO:0044422; G…	metabolic process;transport	cytosol;membrane;mitochondrion	catalytic activity;transporter activity	rno05010; rno00190; rno01100; rno05012; rno05016	0		9.43821e+07	9.39059e+07	1.00435e+08	8.8805e+07		0.0969803	-0.0805747	0.177555		0.676858	0.380834	1.20762
High	P12839	24588		Nefm	Neurofilament medium polypeptide [OS=Rattus norvegicus]	0	48	33	1797	30	1	846	95.7	8773.68	33	[GO:0000226]; GO:0007010; GO:0007017; GO:0006996; GO:0009987; GO:0016043; GO:0008150; GO:0071840 [GO:0005102]; GO:0005515; GO:0005488; GO:0003674 [GO:0005198]; GO:0003674 [GO:0005856]; GO:0043232; GO:0043228; GO:0043229; GO:0043226; GO:0044424; GO:0005575; GO:0005622; GO:0044464; GO:0005623 [GO:0005882]; GO:0045111; GO:0099513; GO:0005856; GO:0044430; GO:0099512; GO:0043232; GO:0044446; GO:009908…	cell organization and biogenesis;cellular component movement;regulation of biological process;response to stimulus;transport	cytoskeleton	protein binding;structural molecule activity	rno05014	4		9.09336e+07	8.44507e+07	9.04631e+07	9.78872e+07		0.0992192	0.21301	-0.113791		0.484231	0.556897	0.261917
High	P04642	24533	ENSRNOG00000013009.2	Ldha	L-lactate dehydrogenase A chain [OS=Rattus norvegicus]	0	62	17	1708	16	1	332	36.4	8254.64	17	[GO:0001666]; GO:0006950; GO:0036293; GO:0050896; GO:0070482; GO:0008150; GO:0009628 [GO:0003824]; GO:0003674 [GO:0004457]; GO:0016614; GO:0016491; GO:0003824; GO:0003674 [GO:0004459]; GO:0004457; GO:0016616; GO:0016614; GO:0016491; GO:0003824; GO:0003674 [GO:0005515]; GO:0005488; GO:0003674 [GO:0005634]; GO:0043231; GO:0043227; GO:0043229; GO:0043226; GO:0044424; GO:0005575; GO:0005622; GO:00444…	cell communication;metabolic process;regulation of biological process;response to stimulus	cytoplasm;cytosol;membrane;mitochondrion;nucleus	catalytic activity;nucleotide binding;protein binding	rno00010; rno05230; rno01100; rno00270; rno00620; rno04066; rno00640; rno04922	1		8.98615e+07	8.62987e+07	8.82915e+07	9.49943e+07		0.0329348	0.138502	-0.105567		0.146003	0.957237	0.522053
High	Q99NA5	114096		Idh3a	Isocitrate dehydrogenase [NAD] subunit alpha, mitochondrial [OS=Rattus norvegicus]	0	40	13	1623	13	1	366	39.6	7172.95	13	[GO:0000287]; GO:0046872; GO:0043169; GO:0043167; GO:0005488; GO:0003674 [GO:0004449]; GO:0004448; GO:0016616; GO:0016614; GO:0016491; GO:0003824; GO:0003674 [GO:0005634]; GO:0043231; GO:0043227; GO:0043229; GO:0043226; GO:0044424; GO:0005575; GO:0005622; GO:0044464; GO:0005623 [GO:0005739]; GO:0043231; GO:0044444; GO:0043227; GO:0043229; GO:0005737; GO:0044424; GO:0043226; GO:0005622; GO:0044464…	metabolic process	mitochondrion;nucleus	catalytic activity;metal ion binding;nucleotide binding	rno01210; rno00020; rno01230; rno01100; rno01200	0		8.68043e+07	8.66883e+07	8.68551e+07	8.68696e+07		0.00277297	0.00301508	-0.000242111		0.0235676	0.0211915	0.0019898
High	P61265	24923	ENSRNOG00000019193.4	Stx1b	Syntaxin-1B [OS=Rattus norvegicus]	0	53	14	1265	14	1	288	33.2	5942.38	14	[GO:0000149]; GO:0005515; GO:0005488; GO:0003674 [GO:0001956]; GO:0007269; GO:0046928; GO:0050806; GO:0051590; GO:1903532; GO:0001505; GO:0006836; GO:0051649; GO:0099531; GO:0099643; GO:0050804; GO:0051588; GO:0060341; GO:1903530; GO:0007268; GO:0010647; GO:0023056; GO:0051050; GO:0032940; GO:0048522; GO:0051047; GO:0065008; GO:0006810; GO:0051234; GO:0051641; GO:0008150; GO:0023061; GO:0099536; …	cell organization and biogenesis;regulation of biological process;transport	cytoplasm;membrane;nucleus	protein binding	rno04721; rno04130	0		8.66824e+07	8.5169e+07	8.30197e+07	9.18587e+07		-0.0368747	0.109089	-0.145964		0.351705	0.855969	1.2851
High	P31044	29542	ENSRNOG00000001136.6	Pebp1	phosphatidylethanolamine-binding protein 1 [OS=Rattus norvegicus]	0	68	8	1270	8	1	187	20.8	6599.09	8	[GO:0000165]; GO:0023014; GO:0035556; GO:0006468; GO:0007165; GO:0006464; GO:0016310; GO:0007154; GO:0009987; GO:0023052; GO:0050794; GO:0051716; GO:0036211; GO:0044267; GO:0006796; GO:0008150; GO:0050789; GO:0050896; GO:0019538; GO:0043412; GO:0044260; GO:0006793; GO:0065007; GO:0043170; GO:0044238; GO:1901564; GO:0044237; GO:0071704; GO:0008152; GO:0006807 [GO:0000166]; GO:0036094; GO:1901265; …	metabolic process;regulation of biological process;response to stimulus	cell surface;cytoplasm;endoplasmic reticulum;Golgi;membrane;mitochondrion;nucleus	enzyme regulator activity;nucleotide binding;protein binding;RNA binding		0		8.55573e+07	8.2732e+07	8.33872e+07	9.05528e+07		0.0113801	0.130315	-0.118934		0.0827351	0.949608	0.877726
High	P34058	301252	ENSRNOG00000019834.6	Hsp90ab1	Heat shock protein HSP 90-beta [OS=Rattus norvegicus]	0	59	34	2996	24	1	724	83.2	13500.2	34	[GO:0000166]; GO:0036094; GO:1901265; GO:0005488; GO:0097159; GO:1901363; GO:0003674 [GO:0001890]; GO:0048513; GO:0048608; GO:0048731; GO:0048856; GO:0003006; GO:0061458; GO:0007275; GO:0032502; GO:0022414; GO:0032501; GO:0008150; GO:0000003 [GO:0002134]; GO:0032551; GO:0032557; GO:0043168; GO:0001884; GO:0032549; GO:0019103; GO:0032553; GO:0043167; GO:0001882; GO:0000166; GO:0097367; GO:0005488;…	cell organization and biogenesis;metabolic process;regulation of biological process;response to stimulus	cell surface;cytoplasm;cytosol;extracellular;membrane;mitochondrion;nucleus	enzyme regulator activity;nucleotide binding;protein binding;RNA binding	rno04612; rno05215; rno04915; rno04141; rno04151; rno04914; rno05200; rno04621	1		8.54626e+07	8.32579e+07	8.82278e+07	8.4902e+07		0.083647	0.0282109	0.055436		0.668097	0.162003	0.371737
High	Q06647	192241	ENSRNOG00000001991.7	Atp5o	ATP synthase subunit O, mitochondrial [OS=Rattus norvegicus]	0	50	8	642	8	1	213	23.4	3021.25	8	[GO:0000276]; GO:0005753; GO:0045263; GO:0098800; GO:0045259; GO:0033177; GO:0044424; GO:0005743; GO:0044455; GO:0098796; GO:0098798; GO:0016469; GO:0005622; GO:0044464; GO:0019866; GO:0031966; GO:0044425; GO:0044429; GO:0043234; GO:0005575; GO:0005623; GO:0031090; GO:0031967; GO:0005740; GO:0016020; GO:0005739; GO:0044444; GO:0044446; GO:0032991; GO:0043227; GO:0044422; GO:0031975; GO:0043231; G…	metabolic process;transport	membrane;mitochondrion;nucleus	catalytic activity;protein binding;transporter activity	rno05010; rno00190; rno01100; rno05012; rno05016	0		8.53496e+07	8.66114e+07	9.01364e+07	7.93011e+07		0.0575534	-0.127217	0.18477		0.255241	0.484751	0.977987
High	P16036	245959		Slc25a3	Phosphate carrier protein, mitochondrial [OS=Rattus norvegicus]	0	47	11	828	11	1	356	39.4	3542.82	11	[GO:0005739]; GO:0043231; GO:0044444; GO:0043227; GO:0043229; GO:0005737; GO:0044424; GO:0043226; GO:0005622; GO:0044464; GO:0005575; GO:0005623 [GO:0005743]; GO:0019866; GO:0031966; GO:0031090; GO:0031967; GO:0044424; GO:0005740; GO:0044429; GO:0016020; GO:0043227; GO:0044422; GO:0031975; GO:0044446; GO:0005622; GO:0044464; GO:0005739; GO:0044444; GO:0005575; GO:0043226; GO:0043229; GO:0005623; …	transport	membrane;mitochondrion	protein binding;transporter activity		0		8.53437e+07	8.33005e+07	8.8216e+07	8.45145e+07		0.0827148	0.0208745	0.0618404		0.593262	0.113745	0.345316
High	P02091	24440		Hbb	Hemoglobin subunit beta-1 [OS=Rattus norvegicus]	0	73	9	757	2	1	147	16	3857.64	9	[GO:0004601]; GO:0016209; GO:0016684; GO:0003674; GO:0016491; GO:0003824 [GO:0005344]; GO:0005215; GO:0140104; GO:0003674 [GO:0005506]; GO:0046914; GO:0046872; GO:0043169; GO:0043167; GO:0005488; GO:0003674 [GO:0005615]; GO:0044421; GO:0005575; GO:0005576 [GO:0005833]; GO:0043234; GO:0044445; GO:0032991; GO:0005829; GO:0044444; GO:0005575; GO:0005737; GO:0044424; GO:0005622; GO:0044464; GO:000562…	cell organization and biogenesis;metabolic process;regulation of biological process;response to stimulus;transport		antioxidant activity;catalytic activity;metal ion binding;protein binding;transporter activity	rno05144; rno05143	0		8.51553e+07	8.03285e+07	7.35013e+07	1.01636e+08		-0.128143	0.339427	-0.46757		0.441519	0.790653	1.23255
High	Q812E9	306439	ENSRNOG00000010731.7	Gpm6a	Neuronal membrane glycoprotein M6-a [OS=Rattus norvegicus]	0	17	6	704	6	1	278	31.2	3007.92	6	[GO:0001764]; GO:0016477; GO:0048699; GO:0048870; GO:0022008; GO:0006928; GO:0040011; GO:0051674; GO:0007399; GO:0030154; GO:0009987; GO:0008150; GO:0051179; GO:0048731; GO:0048869; GO:0007275; GO:0048856; GO:0032502; GO:0032501 [GO:0003407]; GO:0048856; GO:0060041; GO:0032502; GO:0043010; GO:0008150; GO:0001654; GO:0007423; GO:0048513; GO:0048731; GO:0007275; GO:0032501 [GO:0005262]; GO:0005261;…	cell differentiation;cell organization and biogenesis;cellular component movement;regulation of biological process;transport	membrane	protein binding;transporter activity		0		8.30574e+07	8.3065e+07	8.28687e+07	8.32385e+07		-0.00341348	0.00300964	-0.00642312		0.030692	0.0152354	0.0318231
High	P26284	29554		Pdha1	Pyruvate dehydrogenase E1 component subunit alpha, somatic form, mitochondrial [OS=Rattus norvegicus]	0	49	15	1511	15	1	390	43.2	6685.51	15	[GO:0004738]; GO:0016903; GO:0016491; GO:0003824; GO:0003674 [GO:0004739]; GO:0004738; GO:0016624; GO:0016903; GO:0016491; GO:0003824; GO:0003674 [GO:0005634]; GO:0043231; GO:0043227; GO:0043229; GO:0043226; GO:0044424; GO:0005575; GO:0005622; GO:0044464; GO:0005623 [GO:0005730]; GO:0031981; GO:0043232; GO:0044428; GO:0070013; GO:0043228; GO:0043229; GO:0005634; GO:0044446; GO:0043233; GO:0044424…	metabolic process	mitochondrion;nucleus;organelle lumen	catalytic activity		0		8.13382e+07	7.97644e+07	8.41952e+07	8.0055e+07		0.0779939	0.00524766	0.0727462		0.975838	0.0365269	0.757323
High	P63045	24803	ENSRNOG00000006989.7	Vamp2	Vesicle-associated membrane protein 2 [OS=Rattus norvegicus]	0	35	4	1089	2	1	116	12.7	6007.79	4	[GO:0000149]; GO:0005515; GO:0005488; GO:0003674 [GO:0000322]; GO:0005773; GO:0043231; GO:0044444; GO:0043227; GO:0043229; GO:0005737; GO:0044424; GO:0043226; GO:0005622; GO:0044464; GO:0005575; GO:0005623 [GO:0005484]; GO:0005515; GO:0005488; GO:0003674 [GO:0005515]; GO:0005488; GO:0003674 [GO:0005516]; GO:0005515; GO:0005488; GO:0003674 [GO:0005543]; GO:0008289; GO:0043168; GO:0005488; GO:00431…	cell organization and biogenesis;regulation of biological process;response to stimulus;transport	membrane;vacuole	protein binding	rno04721; rno04130; rno04962; rno04970; rno04911	2		8.1022e+07	8.14993e+07	8.30958e+07	7.84707e+07		0.027988	-0.0546344	0.0826224		0.289356	0.393776	0.762373
High	P85969	499903		Napb	Beta-soluble NSF attachment protein [OS=Rattus norvegicus]	0	72	18	2474	16	1	297	33.4	11699.4	18	[GO:0000149]; GO:0005515; GO:0005488; GO:0003674 [GO:0002090]; GO:0031323; GO:0031623; GO:0048259; GO:0060255; GO:0019222; GO:0044237; GO:0050794; GO:0006898; GO:0043112; GO:0030100; GO:0043170; GO:0008152; GO:0050789; GO:0009987; GO:0006897; GO:0044260; GO:0051128; GO:0060627; GO:0071704; GO:0008150; GO:0065007; GO:0016192; GO:0098657; GO:0016043; GO:0051049; GO:0006810; GO:0071840; GO:0032879; …	cell communication;cell organization and biogenesis;regulation of biological process;transport	membrane	protein binding		0		8.06478e+07	8.02167e+07	8.21729e+07	7.95539e+07		0.0347598	-0.0119704	0.0467302		0.345134	0.0700042	0.401357
High	P54921	140673	ENSRNOG00000001494.6	Napa	alpha-soluble nsf attachment protein [OS=Rattus norvegicus]	0	83	21	1298	19	1	295	33.2	5801.67	21	[GO:0000149]; GO:0005515; GO:0005488; GO:0003674 [GO:0005483]; GO:0005515; GO:0005488; GO:0003674 [GO:0005515]; GO:0005488; GO:0003674 [GO:0005774]; GO:0044437; GO:0098588; GO:0098805; GO:0005773; GO:0044444; GO:0044446; GO:0031090; GO:0016020; GO:0043231; GO:0005737; GO:0044424; GO:0043229; GO:0044422; GO:0043227; GO:0005575; GO:0005622; GO:0044464; GO:0043226; GO:0005623 [GO:0005886]; GO:001602…	cell communication;cell differentiation;cell organization and biogenesis;regulation of biological process;transport	membrane	protein binding	rno04721	2		8.01534e+07	7.90087e+07	8.35306e+07	7.79208e+07		0.0802935	-0.0200019	0.100295		0.963945	0.115505	0.900483
High	O88778	29138		Bsn	Protein bassoon [OS=Rattus norvegicus]	0	45	95	3275	93	1	3938	418.2	14565	95	[GO:0001222]; GO:0001221; GO:0008134; GO:0005515; GO:0005488; GO:0003674 [GO:0005515]; GO:0005488; GO:0003674 [GO:0005737]; GO:0044424; GO:0005622; GO:0044464; GO:0005575; GO:0005623 [GO:0005802]; GO:0098791; GO:0031984; GO:0044431; GO:0043227; GO:0044446; GO:0005794; GO:0044444; GO:0043226; GO:0043229; GO:0044422; GO:0044424; GO:0012505; GO:0043231; GO:0005737; GO:0005575; GO:0005622; GO:0044464…	cell organization and biogenesis;cellular component movement;transport	cell surface;cytoplasm;cytoskeleton	metal ion binding;protein binding		2		7.85405e+07	7.84706e+07	8.33597e+07	7.37911e+07		0.0871977	-0.0887053	0.175903		1.18939	0.510313	1.34845
High	P02770	24186		Alb	Serum albumin [OS=Rattus norvegicus]	0	62	30	2326	29	1	608	68.7	10230.9	30	[GO:0001895]; GO:0001894; GO:0048871; GO:0060249; GO:0032501; GO:0042592; GO:0008150; GO:0065008; GO:0065007 [GO:0003677]; GO:0003676; GO:0097159; GO:1901363; GO:0005488; GO:0003674 [GO:0005504]; GO:0008289; GO:0033293; GO:0005488; GO:0031406; GO:0003674; GO:0043168; GO:0043177; GO:0043167; GO:0036094 [GO:0005576]; GO:0005575 [GO:0005604]; GO:0005578; GO:0044420; GO:0031012; GO:0044421; GO:000557…	cell communication;regulation of biological process;response to stimulus;transport	cytoplasm;endoplasmic reticulum;extracellular;Golgi;nucleus	DNA binding;metal ion binding;protein binding	rno04918	1		7.83751e+07	7.28529e+07	6.82163e+07	9.40561e+07		-0.0948713	0.368534	-0.463406		0.291812	1.00065	1.3218
High	Q05546	25567		Tnr	Tenascin-R [OS=Rattus norvegicus]	0	35	29	2382	29	1	1356	149.3	11539.7	29	[GO:0005178]; GO:0005102; GO:0032403; GO:0050839; GO:0005515; GO:0044877; GO:0005488; GO:0003674 [GO:0005515]; GO:0005488; GO:0003674 [GO:0005576]; GO:0005575 [GO:0005578]; GO:0031012; GO:0044421; GO:0005575; GO:0005576 [GO:0007155]; GO:0022610; GO:0008150 [GO:0007158]; GO:0098609; GO:0007155; GO:0022610; GO:0008150 [GO:0007162]; GO:0007155; GO:0030155; GO:0048523; GO:0022610; GO:0050789; GO:0009…	cell organization and biogenesis;cellular component movement;regulation of biological process;response to stimulus	cell surface;extracellular;membrane	protein binding	rno04512; rno04510; rno04151; rno05206	0		7.6439e+07	7.791e+07	7.55896e+07	7.58174e+07		-0.0436217	-0.0392804	-0.00434132		0.567661	0.419933	0.0409668
High	P50398	25183	ENSRNOG00000056870.1	Gdi1	Rab GDP dissociation inhibitor alpha [OS=Rattus norvegicus]	0	72	25	3225	21	1	447	50.5	16224.7	25	[GO:0005092]; GO:0030695; GO:0060589; GO:0030234; GO:0098772; GO:0003674 [GO:0005093]; GO:0005092; GO:0030695; GO:0060589; GO:0030234; GO:0098772; GO:0003674 [GO:0005096]; GO:0008047; GO:0030695; GO:0030234; GO:0060589; GO:0098772; GO:0003674 [GO:0005737]; GO:0044424; GO:0005622; GO:0044464; GO:0005575; GO:0005623 [GO:0005794]; GO:0012505; GO:0043231; GO:0044444; GO:0044464; GO:0043227; GO:004322…	metabolic process;regulation of biological process;response to stimulus;transport	cytoplasm;Golgi	catalytic activity;enzyme regulator activity;protein binding		4		7.61857e+07	7.43482e+07	7.16692e+07	8.25398e+07		-0.0529457	0.150791	-0.203737		0.431322	0.977965	1.50529
High	Q09073	25176	ENSRNOG00000039980.4	Slc25a5	ADP/ATP translocase 2 [OS=Rattus norvegicus]	0	58	16	3464	9	1	298	32.9	16558.6	16	[GO:0003723]; GO:0003676; GO:0097159; GO:1901363; GO:0005488; GO:0003674 [GO:0005215]; GO:0003674 [GO:0005471]; GO:0005347; GO:0015217; GO:0015301; GO:0000295; GO:0005346; GO:0008514; GO:0008509; GO:0099516; GO:0015216; GO:1901505; GO:0015075; GO:0015297; GO:0015215; GO:0022857; GO:0022891; GO:0015291; GO:0015605; GO:0015932; GO:0005215; GO:0022892; GO:0022804; GO:0003674 [GO:0005515]; GO:0005488…	cell organization and biogenesis;regulation of biological process;transport	membrane;mitochondrion;nucleus	protein binding;RNA binding;transporter activity	rno04020; rno05012; rno05166; rno04022; rno05016	0		7.49948e+07	7.28422e+07	7.85861e+07	7.35562e+07		0.1095	0.0140716	0.0954283		1.1254	0.0797519	0.740639
High	Q9Z0W5	29704		Pacsin1	Protein kinase C and casein kinase substrate in neurons protein 1 [OS=Rattus norvegicus]	0	49	17	1373	17	1	441	50.4	6777.17	17	[GO:0005515]; GO:0005488; GO:0003674 [GO:0005543]; GO:0008289; GO:0043168; GO:0005488; GO:0043167; GO:0003674 [GO:0005737]; GO:0044424; GO:0005622; GO:0044464; GO:0005575; GO:0005623 [GO:0005768]; GO:0012505; GO:0031410; GO:0044464; GO:0044444; GO:0097708; GO:0005575; GO:0005623; GO:0005737; GO:0044424; GO:0031982; GO:0043229; GO:0005622; GO:0043227; GO:0043226 [GO:0005802]; GO:0098791; GO:003198…	cell organization and biogenesis;regulation of biological process;transport	cytoplasm;cytosol;endosome;membrane	protein binding		0		7.25342e+07	7.19713e+07	7.10409e+07	7.45905e+07		-0.0187735	0.0515695	-0.070343		0.0918348	0.296374	0.468602
High	P21571	94271	ENSRNOG00000001551.4	Atp5j	ATP synthase-coupling factor 6, mitochondrial [OS=Rattus norvegicus]	0	44	6	662	6	1	108	12.5	3524.68	6	[GO:0000276]; GO:0005753; GO:0045263; GO:0098800; GO:0045259; GO:0033177; GO:0044424; GO:0005743; GO:0044455; GO:0098796; GO:0098798; GO:0016469; GO:0005622; GO:0044464; GO:0019866; GO:0031966; GO:0044425; GO:0044429; GO:0043234; GO:0005575; GO:0005623; GO:0031090; GO:0031967; GO:0005740; GO:0016020; GO:0005739; GO:0044444; GO:0044446; GO:0032991; GO:0043227; GO:0044422; GO:0031975; GO:0043231; G…	metabolic process;transport	membrane;mitochondrion	catalytic activity;transporter activity	rno05010; rno00190; rno01100; rno05012; rno05016	0		7.12588e+07	7.22317e+07	7.4974e+07	6.65707e+07		0.0537579	-0.117747	0.171504		0.311664	0.648276	1.19982
High	Q05140-2	65178		Snap91	Isoform 2 of Clathrin coat assembly protein AP180 [OS=Rattus norvegicus]	0	27	18	1735	16	1	896	91.4	8595.49	18	[GO:0005515]; GO:0005488; GO:0003674 [GO:0005543]; GO:0008289; GO:0043168; GO:0005488; GO:0043167; GO:0003674 [GO:0005545]; GO:0035091; GO:0005543; GO:0008289; GO:0043168; GO:0005488; GO:0043167; GO:0003674 [GO:0005829]; GO:0044444; GO:0005737; GO:0044424; GO:0005622; GO:0044464; GO:0005575; GO:0005623 [GO:0005886]; GO:0016020; GO:0044464; GO:0071944; GO:0005575; GO:0005623 [GO:0005905]; GO:00125…	cell communication;cell organization and biogenesis;regulation of biological process;transport	cytosol;membrane	protein binding		2		7.09541e+07	7.06619e+07	7.35506e+07	6.86498e+07		0.0578063	-0.0416754	0.0994817		0.984789	0.599658	1.78876
High	P11507	29693	ENSRNOG00000001285.8	Atp2a2	Sarcoplasmic/endoplasmic reticulum calcium ATPase 2 [OS=Rattus norvegicus]	0	38	33	2082	33	1	1043	114.7	9779.96	33	[GO:0000166]; GO:0036094; GO:1901265; GO:0005488; GO:0097159; GO:1901363; GO:0003674 [GO:0002026]; GO:0008016; GO:0065008; GO:0060047; GO:1903522; GO:0065007; GO:0003015; GO:0008015; GO:0044057; GO:0008150; GO:0003013; GO:0003008; GO:0051239; GO:0032501; GO:0050789 [GO:0005388]; GO:0015085; GO:0015662; GO:0019829; GO:0046873; GO:0072509; GO:0042625; GO:0008324; GO:0022890; GO:0022853; GO:0042626;…	cell organization and biogenesis;cellular homeostasis;regulation of biological process;response to stimulus;transport	endoplasmic reticulum;membrane	catalytic activity;metal ion binding;nucleotide binding;protein binding;transporter activity	rno04972; rno04020; rno04261; rno05010; rno04024; rno05412; rno05414; rno04260; rno04022; rno05410; rno04919	0		6.97007e+07	6.83763e+07	7.30062e+07	6.77194e+07		0.0945227	-0.0139272	0.10845		1.37713	0.0983943	1.33338
High	Q920L2	157074	ENSRNOG00000013331.5	Sdha	Succinate dehydrogenase [ubiquinone] flavoprotein subunit, mitochondrial [OS=Rattus norvegicus]	0	61	25	2082	25	1	656	71.6	8961.6	25	[GO:0000104]; GO:0016627; GO:0016491; GO:0003824; GO:0003674 [GO:0005730]; GO:0031981; GO:0043232; GO:0044428; GO:0070013; GO:0043228; GO:0043229; GO:0005634; GO:0044446; GO:0043233; GO:0044424; GO:0043226; GO:0043231; GO:0044422; GO:0031974; GO:0005622; GO:0044464; GO:0005575; GO:0043227; GO:0005623 [GO:0005739]; GO:0043231; GO:0044444; GO:0043227; GO:0043229; GO:0005737; GO:0044424; GO:0043226;…	metabolic process;transport	membrane;mitochondrion	catalytic activity;nucleotide binding	rno05010; rno00020; rno00190; rno01100; rno05012; rno04932; rno05016; rno01200	0		6.89677e+07	6.92392e+07	7.17584e+07	6.59053e+07		0.0515596	-0.0711938	0.122753		0.418492	0.540624	1.20527
High	P10860	24399	ENSRNOG00000057367.1	Glud1	Glutamate dehydrogenase 1, mitochondrial [OS=Rattus norvegicus]	0	50	21	1562	21	1	558	61.4	6853.89	21	[GO:0000166]; GO:0036094; GO:1901265; GO:0005488; GO:0097159; GO:1901363; GO:0003674 [GO:0004352]; GO:0004353; GO:0016639; GO:0016638; GO:0016491; GO:0003824; GO:0003674 [GO:0004353]; GO:0016639; GO:0016638; GO:0016491; GO:0003824; GO:0003674 [GO:0005524]; GO:0032559; GO:0035639; GO:0030554; GO:0032555; GO:0043168; GO:1901265; GO:0017076; GO:0032553; GO:0043167; GO:0097159; GO:1901363; GO:0000166…	metabolic process;regulation of biological process;response to stimulus	cytoplasm;membrane;mitochondrion;organelle lumen	catalytic activity;nucleotide binding;protein binding	rno04964; rno00471; rno01100; rno00910; rno00220; rno00250; rno01200	0		6.87272e+07	6.66232e+07	6.57108e+07	7.38474e+07		-0.019893	0.148523	-0.168416		0.124129	0.922863	1.16881
High	P62898	25309; 100363502	ENSRNOG00000032885.1; ENSRNOG00000010452.7	Cycs; LOC100363502	Cytochrome c, somatic [OS=Rattus norvegicus]	0	51	8	807	8	1	105	11.6	4168.57	8	[GO:0002931]; GO:0006950; GO:0050896; GO:0008150 [GO:0005634]; GO:0043231; GO:0043227; GO:0043229; GO:0043226; GO:0044424; GO:0005575; GO:0005622; GO:0044464; GO:0005623 [GO:0005739]; GO:0043231; GO:0044444; GO:0043227; GO:0043229; GO:0005737; GO:0044424; GO:0043226; GO:0005622; GO:0044464; GO:0005575; GO:0005623 [GO:0005758]; GO:0005740; GO:0031970; GO:0044429; GO:0031967; GO:0044446; GO:0070013…	cell death;metabolic process;regulation of biological process;response to stimulus;transport	cytosol;mitochondrion;nucleus	metal ion binding;protein binding	rno05168; rno05010; rno04210; rno05161; rno01524; rno05134; rno05152; rno05164; rno04215; rno05222; rno05416; rno01100; rno05145; rno05200; rno05014; rno05012; rno04932; rno05210; rno04115; rno00920; rno05016	0		6.8418e+07	6.68835e+07	7.05957e+07	6.77746e+07		0.0779305	0.0190945	0.058836		1.24501	0.156786	0.856143
High	P07936	29423	ENSRNOG00000001528.5	Gap43	Neuromodulin [OS=Rattus norvegicus]	0	60	15	1547	15	1	226	23.6	6694.42	15	[GO:0001786]; GO:0005543; GO:0072341; GO:0008289; GO:0043168; GO:0005488; GO:0043167; GO:0003674 [GO:0005515]; GO:0005488; GO:0003674 [GO:0005516]; GO:0005515; GO:0005488; GO:0003674 [GO:0005737]; GO:0044424; GO:0005622; GO:0044464; GO:0005575; GO:0005623 [GO:0005886]; GO:0016020; GO:0044464; GO:0071944; GO:0005575; GO:0005623 [GO:0007275]; GO:0032501; GO:0048856; GO:0008150; GO:0032502 [GO:00073…	cell differentiation;cell organization and biogenesis;cellular component movement;development;regulation of biological process	cytoplasm;membrane	protein binding		0		6.7268e+07	6.42271e+07	6.59273e+07	7.16496e+07		0.0376936	0.157776	-0.120082		0.0478831	0.239817	0.184399
High	P61206	140940	ENSRNOG00000054775.1	Arf3	ADP-ribosylation factor 3 [OS=Rattus norvegicus]	0	71	10	1418	2	1	181	20.6	6785.03	10	[GO:0000166]; GO:0036094; GO:1901265; GO:0005488; GO:0097159; GO:1901363; GO:0003674 [GO:0003924]; GO:0017111; GO:0016462; GO:0016818; GO:0016817; GO:0016787; GO:0003824; GO:0003674 [GO:0004871]; GO:0003674 [GO:0005525]; GO:0032550; GO:0032561; GO:0035639; GO:0001883; GO:0032549; GO:0019001; GO:0032555; GO:0043168; GO:1901265; GO:0001882; GO:0017076; GO:0032553; GO:0043167; GO:0097159; GO:1901363…	regulation of biological process;response to stimulus;transport	cytoplasm;Golgi	catalytic activity;nucleotide binding;protein binding;signal transducer activity	rno04144	8		6.67062e+07	6.36225e+07	6.80206e+07	6.84754e+07		0.0964341	0.106049	-0.00961451		0.437504	0.368813	0.0295912
High	Q9QUH6-1	192117		Syngap1	Ras/Rap GTPase-activating protein SynGAP [OS=Rattus norvegicus]	0	47	36	1983	4	1	1308	144.6	9242.46	36	[GO:0005096]; GO:0008047; GO:0030695; GO:0030234; GO:0060589; GO:0098772; GO:0003674 [GO:0005515]; GO:0005488; GO:0003674 [GO:0005622]; GO:0044464; GO:0005575; GO:0005623 [GO:0005737]; GO:0044424; GO:0005622; GO:0044464; GO:0005575; GO:0005623 [GO:0005886]; GO:0016020; GO:0044464; GO:0071944; GO:0005575; GO:0005623 [GO:0007165]; GO:0007154; GO:0009987; GO:0023052; GO:0050794; GO:0051716; GO:00081…	cell organization and biogenesis;regulation of biological process;response to stimulus	cytoplasm;membrane	enzyme regulator activity;protein binding		30		6.67011e+07	6.68505e+07	7.20639e+07	6.11888e+07		0.108338	-0.127671	0.236009		1.60777	0.702163	1.71046
High	P11240	252934	ENSRNOG00000018816.4	Cox5a	Cytochrome c oxidase subunit 5A, mitochondrial [OS=Rattus norvegicus]	0	49	7	857	7	1	146	16.1	3870.99	7	[GO:0004129]; GO:0009055; GO:0015002; GO:0015078; GO:0016676; GO:0016491; GO:0015077; GO:0016675; GO:0003824; GO:0022890; GO:0003674; GO:0008324; GO:0015075; GO:0022891; GO:0022857; GO:0022892; GO:0005215 [GO:0005739]; GO:0043231; GO:0044444; GO:0043227; GO:0043229; GO:0005737; GO:0044424; GO:0043226; GO:0005622; GO:0044464; GO:0005575; GO:0005623 [GO:0005743]; GO:0019866; GO:0031966; GO:0031090;…	metabolic process;transport	membrane;mitochondrion	catalytic activity;metal ion binding;transporter activity	rno05010; rno00190; rno01100; rno05012; rno04932; rno04260; rno05016	0		6.65218e+07	6.72981e+07	7.04557e+07	6.18114e+07		0.0661509	-0.122693	0.188844		0.336971	0.466775	1.10734
High	Q9WVC0	64551		Sept7	Septin-7 [OS=Rattus norvegicus]	0	52	18	1362	18	1	436	50.5	6149.98	18	[GO:0000166]; GO:0036094; GO:1901265; GO:0005488; GO:0097159; GO:1901363; GO:0003674 [GO:0000281]; GO:0061640; GO:1903047; GO:0000910; GO:0000278; GO:0022402; GO:0051301; GO:0007049; GO:0009987; GO:0008150 [GO:0000775]; GO:0098687; GO:0044427; GO:0005694; GO:0044446; GO:0043232; GO:0043229; GO:0044422; GO:0044424; GO:0043228; GO:0043226; GO:0005575; GO:0005622; GO:0044464; GO:0005623 [GO:0000776]…	cell differentiation;cell division;cell growth;cell organization and biogenesis;regulation of biological process	chromosome;cytoplasm;cytoskeleton;membrane;nucleus	nucleotide binding;protein binding		0		6.44925e+07	6.48515e+07	6.43683e+07	6.42576e+07		-0.0107887	-0.0132732	0.00248446		0.129716	0.130008	0.0245385
High	Q9JK11	83765		Rtn4	Reticulon-4 [OS=Rattus norvegicus]	0	57	35	1535	32	1	1163	126.3	7205.57	35	[GO:0001525]; GO:0048514; GO:0048646; GO:0001568; GO:0009653; GO:0032502; GO:0001944; GO:0048856; GO:0008150; GO:0048731; GO:0072358; GO:0007275; GO:0072359; GO:0032501 [GO:0003723]; GO:0003676; GO:0097159; GO:1901363; GO:0005488; GO:0003674 [GO:0005515]; GO:0005488; GO:0003674 [GO:0005622]; GO:0044464; GO:0005575; GO:0005623 [GO:0005635]; GO:0012505; GO:0031967; GO:0044428; GO:0044464; GO:003197…	cell differentiation;cell organization and biogenesis;cellular component movement;regulation of biological process;response to stimulus	cytoplasm;endoplasmic reticulum;membrane	protein binding;RNA binding	rno05010	3		6.39459e+07	6.33966e+07	6.75977e+07	6.08435e+07		0.0925688	-0.0593016	0.15187		0.880771	0.397293	1.75152
High	P63319	24681	ENSRNOG00000054371.1	Prkcg	Protein kinase C gamma type [OS=Rattus norvegicus]	0	46	22	1903	20	1	697	78.3	8981.66	22	[GO:0000166]; GO:0036094; GO:1901265; GO:0005488; GO:0097159; GO:1901363; GO:0003674 [GO:0004672]; GO:0016301; GO:0016773; GO:0140096; GO:0016772; GO:0003824; GO:0016740; GO:0003674 [GO:0004674]; GO:0004672; GO:0016301; GO:0016773; GO:0140096; GO:0016772; GO:0003824; GO:0016740; GO:0003674 [GO:0004697]; GO:0004674; GO:0004672; GO:0016301; GO:0016773; GO:0140096; GO:0016772; GO:0003824; GO:0016740…	cell communication;metabolic process;regulation of biological process;response to stimulus	cytoplasm;cytosol;membrane;nucleus	catalytic activity;metal ion binding;nucleotide binding;protein binding	rno04921; rno04530; rno04010; rno04012; rno04972; rno04020; rno04071; rno04961; rno04960; rno04540; rno05214; rno05161; rno05032; rno04510; rno04723; rno04015; rno04370; rno05146; rno04666; rno05231; rno04650; rno04724; rno05223; rno01521; rno04725; rno05200; rno04014; rno04918; rno04730; rno05206; rno04670; rno04066; rno04727; rno04916; rno05205; rno04713; rno04150; rno04925; rno05031; rno04270;…	2		6.38341e+07	6.43338e+07	6.62978e+07	6.08706e+07		0.0433841	-0.0798317	0.123216		0.62551	0.5561	1.03266
High	P61107	94197		Rab14	Ras-related protein Rab-14 [OS=Rattus norvegicus]	0	63	10	699	9	1	215	23.9	2929.56	10	[GO:0000139]; GO:0044431; GO:0098588; GO:0098791; GO:0005794; GO:0044444; GO:0044446; GO:0031090; GO:0031984; GO:0012505; GO:0043231; GO:0005737; GO:0044424; GO:0043229; GO:0044422; GO:0016020; GO:0043227; GO:0044464; GO:0005622; GO:0043226; GO:0005575; GO:0005623 [GO:0000166]; GO:0036094; GO:1901265; GO:0005488; GO:0097159; GO:1901363; GO:0003674 [GO:0003924]; GO:0017111; GO:0016462; GO:0016818;…	cell organization and biogenesis;defense response;regulation of biological process;response to stimulus;transport	cytosol;endoplasmic reticulum;endosome;Golgi;membrane;vacuole	catalytic activity;nucleotide binding;protein binding	rno04152	1		6.36003e+07	6.10219e+07	6.20012e+07	6.77776e+07		0.0229693	0.151481	-0.128512		0.102689	0.708719	0.652214
High	P62944-2	140670	ENSRNOG00000061543.1	Ap2b1; LOC100912146	Isoform 2 of AP-2 complex subunit beta [OS=Rattus norvegicus]	0	54	36	2081	23	1	951	105.6	9560.64	36	[GO:0003279]; GO:0003205; GO:0048856; GO:0007507; GO:0032502; GO:0048513; GO:0072359; GO:0008150; GO:0048731; GO:0007275; GO:0032501 [GO:0003281]; GO:0003231; GO:0003279; GO:0003205; GO:0048856; GO:0007507; GO:0032502; GO:0048513; GO:0072359; GO:0008150; GO:0048731; GO:0007275; GO:0032501 [GO:0005488]; GO:0003674 [GO:0005515]; GO:0005488; GO:0003674 [GO:0005623]; GO:0005575 [GO:0005737]; GO:00444…	cell communication;cell organization and biogenesis;transport	cytoplasm;membrane	protein binding;transporter activity	rno04961; rno04721; rno04144; rno05016	13		6.31712e+07	6.37787e+07	6.26713e+07	6.30637e+07		-0.0252706	-0.0162651	-0.00900545		0.253661	0.138072	0.06063
High	Q02563	117559	ENSRNOG00000021182.5	Sv2a	Synaptic vesicle glycoprotein 2A [OS=Rattus norvegicus]	0	35	16	1678	16	1	742	82.6	8011.41	16	[GO:0004872]; GO:0060089; GO:0003674 [GO:0005215]; GO:0003674 [GO:0005515]; GO:0005488; GO:0003674 [GO:0005783]; GO:0012505; GO:0043231; GO:0044444; GO:0044464; GO:0043227; GO:0043229; GO:0005737; GO:0044424; GO:0005575; GO:0005623; GO:0043226; GO:0005622 [GO:0005911]; GO:0030054; GO:0005575 [GO:0006810]; GO:0051234; GO:0051179; GO:0008150 [GO:0006836]; GO:0006810; GO:0051234; GO:0051179; GO:0008…	cellular homeostasis;regulation of biological process;transport	endoplasmic reticulum;membrane	protein binding;receptor activity;transporter activity	rno04512	0		6.07603e+07	6.02823e+07	6.11423e+07	6.08563e+07		0.0204358	0.0136721	0.00676371		0.144858	0.0831548	0.0430595
High	Q63345	24558		Mog	Myelin-oligodendrocyte glycoprotein [OS=Rattus norvegicus]	0	29	8	873	8	1	245	27.9	3536.14	8	[GO:0003674] [GO:0007155]; GO:0022610; GO:0008150 [GO:0007568]; GO:0032502; GO:0008150 [GO:0009986]; GO:0044464; GO:0005575; GO:0005623 [GO:0016020]; GO:0005575 [GO:0016021]; GO:0031224; GO:0044425; GO:0005575; GO:0016020 [GO:0033993]; GO:0010033; GO:0042221; GO:0050896; GO:0008150 [GO:0043209]; GO:0044464; GO:0005575; GO:0005623 [GO:0045121]; GO:0098857; GO:0098589; GO:0016020; GO:0044425; GO:00…	response to stimulus	cell surface;membrane			0		6.06764e+07	6.56515e+07	5.82871e+07	5.80907e+07		-0.171651	-0.176519	0.00486814		0.360472	0.297371	0.00652181
High	P68255	25577	ENSRNOG00000051650.1	Ywhaq	14-3-3 protein theta [OS=Rattus norvegicus]	0	67	16	1967	14	1	245	27.8	8904.38	16	[GO:0005515]; GO:0005488; GO:0003674 [GO:0005737]; GO:0044424; GO:0005622; GO:0044464; GO:0005575; GO:0005623 [GO:0005925]; GO:0005924; GO:0005912; GO:0030055; GO:0070161; GO:0030054; GO:0005575 [GO:0006605]; GO:0006886; GO:0015031; GO:0034613; GO:0046907; GO:0015833; GO:0045184; GO:0008104; GO:0070727; GO:0006810; GO:0051641; GO:0051649; GO:0042886; GO:0071702; GO:0051234; GO:0033036; GO:0051179…	regulation of biological process;response to stimulus;transport	cytoplasm;membrane	protein binding	rno05203; rno05161; rno05169; rno04151; rno04110; rno04114; rno04390	2		6.05356e+07	5.86474e+07	5.80837e+07	6.48755e+07		-0.0139343	0.145606	-0.15954		0.0643342	0.848029	0.887883
High	P35565	29144	ENSRNOG00000003343.6	Canx	Calnexin [OS=Rattus norvegicus]	0	40	19	1264	19	1	591	67.2	5393.69	19	[GO:0003723]; GO:0003676; GO:0097159; GO:1901363; GO:0005488; GO:0003674 [GO:0005509]; GO:0046872; GO:0043169; GO:0043167; GO:0005488; GO:0003674 [GO:0005515]; GO:0005488; GO:0003674 [GO:0005737]; GO:0044424; GO:0005622; GO:0044464; GO:0005575; GO:0005623 [GO:0005783]; GO:0012505; GO:0043231; GO:0044444; GO:0044464; GO:0043227; GO:0043229; GO:0005737; GO:0044424; GO:0005575; GO:0005623; GO:004322…	metabolic process;transport	cytoplasm;endoplasmic reticulum;membrane;ribosome	metal ion binding;protein binding;RNA binding	rno04612; rno04141; rno04918; rno04145; rno05166	0		6.05112e+07	5.91407e+07	6.20875e+07	6.03055e+07		0.0701494	0.0281361	0.0420133		1.15878	0.2231	0.375305
High	P63012	25531	ENSRNOG00000019433.6	Rab3a	Ras-related protein Rab-3A [OS=Rattus norvegicus]	0	45	7	1302	4	1	220	25	6296.97	7	[GO:0000166]; GO:0036094; GO:1901265; GO:0005488; GO:0097159; GO:1901363; GO:0003674 [GO:0001669]; GO:0030141; GO:0097223; GO:0012505; GO:0099503; GO:0044464; GO:0031410; GO:0005575; GO:0005623; GO:0044444; GO:0097708; GO:0005737; GO:0044424; GO:0031982; GO:0043229; GO:0005622; GO:0043227; GO:0043226 [GO:0001671]; GO:0008047; GO:0060590; GO:0030234; GO:0060589; GO:0098772; GO:0003674 [GO:0003016]…	cell communication;cell organization and biogenesis;regulation of biological process;response to stimulus;transport	cytosol;endosome;membrane	catalytic activity;enzyme regulator activity;nucleotide binding;protein binding	rno04721; rno04911	1		5.9964e+07	5.92987e+07	5.9162e+07	6.14314e+07		-0.00332862	0.0509747	-0.0543033		0.0235044	0.304682	0.364174
High	P62630	171361	ENSRNOG00000009439.6	Eef1a1	Elongation factor 1-alpha 1 [OS=Rattus norvegicus]	0	55	13	2180	8	1	462	50.1	9806.24	13	[GO:0000049]; GO:0003723; GO:0003676; GO:0097159; GO:1901363; GO:0005488; GO:0003674 [GO:0000166]; GO:0036094; GO:1901265; GO:0005488; GO:0097159; GO:1901363; GO:0003674 [GO:0003723]; GO:0003676; GO:0097159; GO:1901363; GO:0005488; GO:0003674 [GO:0003729]; GO:0003723; GO:0003676; GO:0097159; GO:1901363; GO:0005488; GO:0003674 [GO:0003746]; GO:0008135; GO:0003723; GO:0003676; GO:0097159; GO:190136…	cell organization and biogenesis;metabolic process;regulation of biological process;response to stimulus	cytoplasm;cytoskeleton;cytosol;membrane;nucleus	catalytic activity;nucleotide binding;protein binding;RNA binding	rno05134; rno03013	0		5.97782e+07	5.96042e+07	5.88308e+07	6.08995e+07		-0.0188441	0.0310154	-0.0498594		0.11317	0.157911	0.319198
High	Q5RJQ4	361532	ENSRNOG00000020102.6	Sirt2	NAD-dependent protein deacetylase sirtuin-2 [OS=Rattus norvegicus]	0	66	16	2163	16	1	350	39.3	10727.3	16	[GO:0000122]; GO:0006357; GO:0006366; GO:0045892; GO:0006355; GO:0006351; GO:0010629; GO:1903507; GO:2000113; GO:0010468; GO:1903506; GO:2000112; GO:0010467; GO:0034645; GO:0097659; GO:0010605; GO:1902679; GO:0010558; GO:0031327; GO:0060255; GO:2001141; GO:0010556; GO:0031326; GO:0043170; GO:0009059; GO:0044249; GO:0044260; GO:0032774; GO:0009892; GO:0051253; GO:0009890; GO:0031324; GO:0019222; G…	cell communication;cell differentiation;cell division;cell organization and biogenesis;metabolic process;regulation of biological process;response to stimulus	chromosome;cytoplasm;cytoskeleton;cytosol;membrane;mitochondrion;nucleus	catalytic activity;metal ion binding;nucleotide binding;protein binding		0		5.90318e+07	6.51272e+07	5.64124e+07	5.55556e+07		-0.207248	-0.229329	0.022081		0.580069	0.500005	0.037465
High	P49432	289950	ENSRNOG00000007895.5	Pdhb	Pyruvate dehydrogenase E1 component subunit beta, mitochondrial [OS=Rattus norvegicus]	0	47	12	1871	12	1	359	39	9289.91	12	[GO:0003824]; GO:0003674 [GO:0004738]; GO:0016903; GO:0016491; GO:0003824; GO:0003674 [GO:0004739]; GO:0004738; GO:0016624; GO:0016903; GO:0016491; GO:0003824; GO:0003674 [GO:0005634]; GO:0043231; GO:0043227; GO:0043229; GO:0043226; GO:0044424; GO:0005575; GO:0005622; GO:0044464; GO:0005623 [GO:0005654]; GO:0031981; GO:0044428; GO:0070013; GO:0005634; GO:0044446; GO:0043229; GO:0043233; GO:004442…	metabolic process	mitochondrion;nucleus;organelle lumen	catalytic activity	rno00010; rno05230; rno00020; rno01100; rno00620; rno04066; rno04922; rno01200	0		5.81988e+07	5.8423e+07	5.85867e+07	5.75868e+07		0.00403548	-0.0207983	0.0248338		0.0282296	0.144945	0.243246
High	P84076	29177	ENSRNOG00000006979.7	Hpca	Neuron-specific calcium-binding protein hippocalcin [OS=Rattus norvegicus]	0	60	11	1227	6	1	193	22.4	5210.76	11	[GO:0003779]; GO:0008092; GO:0005515; GO:0005488; GO:0003674 [GO:0005509]; GO:0046872; GO:0043169; GO:0043167; GO:0005488; GO:0003674 [GO:0005515]; GO:0005488; GO:0003674 [GO:0005737]; GO:0044424; GO:0005622; GO:0044464; GO:0005575; GO:0005623 [GO:0005829]; GO:0044444; GO:0005737; GO:0044424; GO:0005622; GO:0044464; GO:0005575; GO:0005623 [GO:0007420]; GO:0007417; GO:0048513; GO:0060322; GO:00073…	regulation of biological process;response to stimulus	cytoplasm;cytosol;membrane	metal ion binding;protein binding		5		5.81396e+07	6.02348e+07	5.97332e+07	5.44508e+07		-0.012065	-0.145643	0.133578		0.057282	0.746804	0.798431
High	O35303-1	114114	ENSRNOG00000001813.8	Dnm1l	Dynamin-1-like protein [OS=Rattus norvegicus]	0	64	34	2658	3	1	755	83.9	12853.2	34	[GO:0000139]; GO:0044431; GO:0098588; GO:0098791; GO:0005794; GO:0044444; GO:0044446; GO:0031090; GO:0031984; GO:0012505; GO:0043231; GO:0005737; GO:0044424; GO:0043229; GO:0044422; GO:0016020; GO:0043227; GO:0044464; GO:0005622; GO:0043226; GO:0005575; GO:0005623 [GO:0000166]; GO:0036094; GO:1901265; GO:0005488; GO:0097159; GO:1901363; GO:0003674 [GO:0000266]; GO:0007005; GO:0048285; GO:0006996;…	cell death;cell organization and biogenesis;regulation of biological process;response to stimulus;transport	cytoplasm;cytoskeleton;cytosol;endoplasmic reticulum;Golgi;membrane;mitochondrion	catalytic activity;nucleotide binding;protein binding	rno04668; rno04621	31		5.78737e+07	5.71853e+07	6.12961e+07	5.51397e+07		0.100152	-0.0525518	0.152703		1.36169	0.514752	1.92848
High	P19511	171375; 100911417	ENSRNOG00000016000.6; ENSRNOG00000046299.2	Atp5f1; LOC100911417	ATP synthase F(0) complex subunit B1, mitochondrial [OS=Rattus norvegicus]	0	39	9	1724	9	1	256	28.9	7960.08	9	[GO:0000276]; GO:0005753; GO:0045263; GO:0098800; GO:0045259; GO:0033177; GO:0044424; GO:0005743; GO:0044455; GO:0098796; GO:0098798; GO:0016469; GO:0005622; GO:0044464; GO:0019866; GO:0031966; GO:0044425; GO:0044429; GO:0043234; GO:0005575; GO:0005623; GO:0031090; GO:0031967; GO:0005740; GO:0016020; GO:0005739; GO:0044444; GO:0044446; GO:0032991; GO:0043227; GO:0044422; GO:0031975; GO:0043231; G…	metabolic process;transport	membrane;mitochondrion;nucleus	catalytic activity;transporter activity	rno05010; rno00190; rno01100; rno05012; rno05016	0		5.77334e+07	5.62927e+07	6.27066e+07	5.42008e+07		0.15567	-0.0546324	0.210302		1.61311	0.30476	1.89769
High	Q3KR86	312444		Immt	MICOS complex subunit Mic60 [OS=Rattus norvegicus]	0	51	24	1341	24	1	609	67.1	5578.02	24	[GO:0003674] [GO:0003723]; GO:0003676; GO:0097159; GO:1901363; GO:0005488; GO:0003674 [GO:0005739]; GO:0043231; GO:0044444; GO:0043227; GO:0043229; GO:0005737; GO:0044424; GO:0043226; GO:0005622; GO:0044464; GO:0005575; GO:0005623 [GO:0005743]; GO:0019866; GO:0031966; GO:0031090; GO:0031967; GO:0044424; GO:0005740; GO:0044429; GO:0016020; GO:0043227; GO:0044422; GO:0031975; GO:0044446; GO:0005622…	cell organization and biogenesis;cellular homeostasis;response to stimulus	membrane;mitochondrion	RNA binding		0		5.65579e+07	5.59081e+07	6.16914e+07	5.20741e+07		0.142012	-0.102492	0.244503		1.56906	0.692455	2.40647
High	P13221	24401	ENSRNOG00000016356.7	Got1	Aspartate aminotransferase, cytoplasmic [OS=Rattus norvegicus]	0	52	14	1239	14	1	413	46.4	5838.17	14	[GO:0003824]; GO:0003674 [GO:0004069]; GO:0008483; GO:0016769; GO:0016740; GO:0003824; GO:0003674 [GO:0004609]; GO:0016831; GO:0016830; GO:0016829; GO:0003824; GO:0003674 [GO:0005634]; GO:0043231; GO:0043227; GO:0043229; GO:0043226; GO:0044424; GO:0005575; GO:0005622; GO:0044464; GO:0005623 [GO:0005654]; GO:0031981; GO:0044428; GO:0070013; GO:0005634; GO:0044446; GO:0043229; GO:0043233; GO:004442…	metabolic process;regulation of biological process;response to stimulus	cytoplasm;cytosol;mitochondrion;nucleus;vacuole	catalytic activity	rno00350; rno00330; rno00400; rno01210; rno01230; rno01100; rno00270; rno00220; rno00250; rno00360; rno01200	0		5.64809e+07	5.49105e+07	5.38472e+07	6.0685e+07		-0.0282108	0.144259	-0.17247		0.206942	1.1873	1.50208
High	Q6P6R2	298942	ENSRNOG00000006364.7	Dld	Dihydrolipoyl dehydrogenase, mitochondrial [OS=Rattus norvegicus]	0	50	15	1418	15	1	509	54	6981.69	15	[GO:0001669]; GO:0030141; GO:0097223; GO:0012505; GO:0099503; GO:0044464; GO:0031410; GO:0005575; GO:0005623; GO:0044444; GO:0097708; GO:0005737; GO:0044424; GO:0031982; GO:0043229; GO:0005622; GO:0043227; GO:0043226 [GO:0004148]; GO:0016668; GO:0016651; GO:0016667; GO:0016491; GO:0003824; GO:0003674 [GO:0005654]; GO:0031981; GO:0044428; GO:0070013; GO:0005634; GO:0044446; GO:0043229; GO:0043233;…	cellular homeostasis;metabolic process;regulation of biological process	mitochondrion;organelle lumen	catalytic activity;nucleotide binding	rno00010; rno00020; rno01100; rno00280; rno00260; rno00620; rno00630; rno00640; rno01200	0		5.64617e+07	5.60429e+07	5.63796e+07	5.69627e+07		0.00864064	0.0234841	-0.0148434		0.0527253	0.136371	0.0971533
High	Q63633-2	171373		Slc12a5	Isoform 2 of Solute carrier family 12 member 5 [OS=Rattus norvegicus]	0	31	23	1144	22	1	1116	123.5	4934.71	23	[GO:0003333]; GO:0006865; GO:1905039; GO:0046942; GO:0071705; GO:0098656; GO:1903825; GO:0015711; GO:0015849; GO:0006810; GO:0006820; GO:0034220; GO:0055085; GO:0071702; GO:0051234; GO:0006811; GO:0051179; GO:0008150 [GO:0005515]; GO:0005488; GO:0003674 [GO:0005886]; GO:0016020; GO:0044464; GO:0071944; GO:0005575; GO:0005623 [GO:0005887]; GO:0016021; GO:0031226; GO:0031224; GO:0044459; GO:0044425…	cell communication;cellular homeostasis;response to stimulus;transport	membrane	protein binding;transporter activity	rno04727	1		5.64436e+07	5.53878e+07	5.5903e+07	5.804e+07		0.01336	0.0674804	-0.0541205		0.0731863	0.326235	0.293763
High	O35095	89791	ENSRNOG00000011751.4	Ncdn	Neurochondrin [OS=Rattus norvegicus]	0	63	32	2917	32	1	729	78.9	13959.6	32	[GO:0005488]; GO:0003674 [GO:0005515]; GO:0005488; GO:0003674 [GO:0005634]; GO:0043231; GO:0043227; GO:0043229; GO:0043226; GO:0044424; GO:0005575; GO:0005622; GO:0044464; GO:0005623 [GO:0005737]; GO:0044424; GO:0005622; GO:0044464; GO:0005575; GO:0005623 [GO:0005829]; GO:0044444; GO:0005737; GO:0044424; GO:0005622; GO:0044464; GO:0005575; GO:0005623 [GO:0016020]; GO:0005575 [GO:0030424]; GO:0043…	cell organization and biogenesis;regulation of biological process	cytoplasm;cytosol;membrane;nucleus	protein binding		0		5.64366e+07	5.5509e+07	6.04951e+07	5.33056e+07		0.124096	-0.0584345	0.18253		1.03449	0.293022	1.35487
High	Q812D3	301432	ENSRNOG00000013636.5	Ppil3	peptidyl-prolyl cis-trans isomerase-like 3 [OS=Rattus norvegicus]	0.009	16	2	107	2	1	161	18.1	388.37	2	[GO:0000413]; GO:0018208; GO:0018193; GO:0006464; GO:0036211; GO:0044267; GO:0019538; GO:0043412; GO:0044260; GO:0043170; GO:0044238; GO:1901564; GO:0044237; GO:0071704; GO:0008152; GO:0006807; GO:0009987; GO:0008150 [GO:0003674] [GO:0003755]; GO:0016859; GO:0140096; GO:0016853; GO:0003824; GO:0003674 [GO:0005575] [GO:0005681]; GO:0030529; GO:0044428; GO:0044424; GO:1990904; GO:0005634; GO:004444…	metabolic process	spliceosomal complex	catalytic activity		0		5.60699e+07	5.25445e+07	5.28946e+07	6.27706e+07		0.00958138	0.25655	-0.246969		0.0127803	0.427628	0.65412
High	P35434	245965		Atp5d	ATP synthase subunit delta, mitochondrial [OS=Rattus norvegicus]	0.004	35	3	186	3	1	168	17.6	806.98	3	[GO:0000275]; GO:0005753; GO:0045261; GO:0098800; GO:0045259; GO:0033178; GO:0044424; GO:0005743; GO:0044455; GO:0098796; GO:0098798; GO:0016469; GO:0005622; GO:0044464; GO:0019866; GO:0031966; GO:0044425; GO:0044429; GO:0043234; GO:0005575; GO:0005623; GO:0031090; GO:0031967; GO:0005740; GO:0016020; GO:0005739; GO:0044444; GO:0044446; GO:0032991; GO:0043227; GO:0044422; GO:0031975; GO:0043231; G…	metabolic process;transport	membrane;mitochondrion	catalytic activity;protein binding;transporter activity	rno05010; rno00190; rno01100; rno05012; rno05016	0		5.57724e+07	5.49013e+07	5.94005e+07	5.30154e+07		0.113635	-0.0504307	0.164065		0.621449	0.219965	0.873121
High	P19332-8				Isoform Tau-H of Microtubule-associated protein tau [OS=Rattus norvegicus]	0	27	14	1003	1	1	775	81.1	4355.27	14	[GO:0015631]; GO:0008092; GO:0005515; GO:0005488; GO:0003674			protein binding		13		5.52771e+07	5.48193e+07	5.36737e+07	5.73382e+07		-0.030467	0.0648126	-0.0952796		0.226282	0.483766	0.783651
High	Q641Y2	289218	ENSRNOG00000038372.4	Ndufs2	NADH dehydrogenase [ubiquinone] iron-sulfur protein 2, mitochondrial [OS=Rattus norvegicus]	0	55	16	1503	16	1	463	52.5	7330.27	16	[GO:0003674] [GO:0003954]; GO:0016651; GO:0016491; GO:0003824; GO:0003674 [GO:0005575] [GO:0005654]; GO:0031981; GO:0044428; GO:0070013; GO:0005634; GO:0044446; GO:0043229; GO:0043233; GO:0044424; GO:0043231; GO:0044422; GO:0043226; GO:0031974; GO:0005622; GO:0044464; GO:0043227; GO:0005575; GO:0005623 [GO:0005739]; GO:0043231; GO:0044444; GO:0043227; GO:0043229; GO:0005737; GO:0044424; GO:004322…	metabolic process;response to stimulus;transport	membrane;mitochondrion	catalytic activity;metal ion binding;nucleotide binding;protein binding	rno05010; rno00190; rno01100; rno05012; rno04932; rno05016	0		5.48199e+07	5.42815e+07	5.94531e+07	5.07251e+07		0.131291	-0.0977591	0.22905		1.16642	0.493873	1.6304
High	P48768	140447		Slc8a2	Sodium/calcium exchanger 2 [OS=Rattus norvegicus]	0	33	20	1706	20	1	921	100.5	7542.94	20	[GO:0005432]; GO:0015081; GO:0015368; GO:0015077; GO:0046873; GO:0015085; GO:0015491; GO:0022890; GO:0072509; GO:0015298; GO:0099516; GO:0008324; GO:0015297; GO:0015075; GO:0015291; GO:0022891; GO:0022804; GO:0022857; GO:0022892; GO:0005215; GO:0003674 [GO:0005515]; GO:0005488; GO:0003674 [GO:0005516]; GO:0005515; GO:0005488; GO:0003674 [GO:0005739]; GO:0043231; GO:0044444; GO:0043227; GO:0043229…	cell communication;cellular homeostasis;regulation of biological process;response to stimulus;transport	membrane;mitochondrion	metal ion binding;protein binding;transporter activity	rno04020; rno04740; rno04974; rno04022	0		5.46815e+07	5.38175e+07	5.67692e+07	5.34577e+07		0.0770324	-0.00967784	0.0867102		0.609522	0.0412575	0.522896
High	P53534	25739		Pygb	Glycogen phosphorylase, brain form [OS=Rattus norvegicus]	0	41	26	1717	20	1	838	96.1	7615.59	26	[GO:0003824]; GO:0003674 [GO:0004645]; GO:0016758; GO:0016757; GO:0016740; GO:0003824; GO:0003674 [GO:0005737]; GO:0044424; GO:0005622; GO:0044464; GO:0005575; GO:0005623 [GO:0005975]; GO:0044238; GO:0071704; GO:0008152; GO:0008150 [GO:0005977]; GO:0006073; GO:0006112; GO:0044042; GO:0044264; GO:0015980; GO:0005976; GO:0044260; GO:0044262; GO:0006091; GO:0055114; GO:0005975; GO:0043170; GO:004423…	metabolic process	cytoplasm;membrane	catalytic activity;protein binding	rno00500; rno01100; rno04931; rno04922; rno04910	6		5.30759e+07	5.05543e+07	5.16507e+07	5.70226e+07		0.030953	0.173701	-0.142748		0.203624	1.44628	1.06687
High	P09117	24191	ENSRNOG00000011452.8	Aldoc	Fructose-bisphosphate aldolase C [OS=Rattus norvegicus]	0	56	15	1898	15	1	363	39.3	9242.12	15	[GO:0001666]; GO:0006950; GO:0036293; GO:0050896; GO:0070482; GO:0008150; GO:0009628 [GO:0003824]; GO:0003674 [GO:0004332]; GO:0016832; GO:0016830; GO:0016829; GO:0003824; GO:0003674 [GO:0005515]; GO:0005488; GO:0003674 [GO:0005737]; GO:0044424; GO:0005622; GO:0044464; GO:0005575; GO:0005623 [GO:0005739]; GO:0043231; GO:0044444; GO:0043227; GO:0043229; GO:0005737; GO:0044424; GO:0043226; GO:00056…	cell death;cell differentiation;cell organization and biogenesis;metabolic process;response to stimulus	cytoplasm;mitochondrion	catalytic activity;protein binding	rno00010; rno00030; rno01230; rno01100; rno00051; rno01200	0		5.29349e+07	5.05192e+07	5.02452e+07	5.80401e+07		-0.00784636	0.200218	-0.208064		0.0414405	0.884594	0.978486
High	P08461	81654	ENSRNOG00000009994.5	Dlat	Dihydrolipoyllysine-residue acetyltransferase component of pyruvate dehydrogenase complex, mitochondrial [OS=Rattus norvegicus]	0	35	13	1308	13	1	632	67.1	6098.18	13	[GO:0000166]; GO:0036094; GO:1901265; GO:0005488; GO:0097159; GO:1901363; GO:0003674 [GO:0004742]; GO:0016418; GO:0030523; GO:0140096; GO:0016407; GO:0016417; GO:0003824; GO:0016747; GO:0003674; GO:0016746; GO:0016740 [GO:0005739]; GO:0043231; GO:0044444; GO:0043227; GO:0043229; GO:0005737; GO:0044424; GO:0043226; GO:0005622; GO:0044464; GO:0005575; GO:0005623 [GO:0005759]; GO:0044429; GO:0070013…	metabolic process	mitochondrion;organelle lumen	catalytic activity;nucleotide binding;protein binding	rno00010; rno00020; rno01100; rno00620; rno01200	0		5.28929e+07	5.29516e+07	5.48017e+07	5.09254e+07		0.0495453	-0.0562892	0.105835		0.441292	0.345643	0.951611
High	P09606	24957	ENSRNOG00000049560.2	Glul	Glutamine synthetase [OS=Rattus norvegicus]	0	37	9	1046	9	1	373	42.2	5736.36	9	[GO:0000166]; GO:0036094; GO:1901265; GO:0005488; GO:0097159; GO:1901363; GO:0003674 [GO:0000287]; GO:0046872; GO:0043169; GO:0043167; GO:0005488; GO:0003674 [GO:0003824]; GO:0003674 [GO:0004351]; GO:0016831; GO:0016830; GO:0016829; GO:0003824; GO:0003674 [GO:0004356]; GO:0016211; GO:0016880; GO:0016879; GO:0016874; GO:0003824; GO:0003674 [GO:0005524]; GO:0032559; GO:0035639; GO:0030554; GO:00325…	cell communication;cell organization and biogenesis;cell proliferation;metabolic process;regulation of biological process;response to stimulus	cytoplasm;cytosol;endoplasmic reticulum;mitochondrion;nucleus	catalytic activity;metal ion binding;nucleotide binding;protein binding	rno04724; rno01230; rno01100; rno00910; rno00220; rno00630; rno04727; rno00250	0		5.2344e+07	5.07738e+07	5.09119e+07	5.53464e+07		0.0039176	0.124405	-0.120487		0.0227256	0.898427	0.867044
High	Q8VHF5	170587		Cs	citrate synthase, mitochondrial [OS=Rattus norvegicus]	0	39	12	1077	12	1	466	51.8	4673.3	12	[GO:0003723]; GO:0003676; GO:0097159; GO:1901363; GO:0005488; GO:0003674 [GO:0004108]; GO:0036440; GO:0046912; GO:0016746; GO:0016740; GO:0003824; GO:0003674 [GO:0005634]; GO:0043231; GO:0043227; GO:0043229; GO:0043226; GO:0044424; GO:0005575; GO:0005622; GO:0044464; GO:0005623 [GO:0005739]; GO:0043231; GO:0044444; GO:0043227; GO:0043229; GO:0005737; GO:0044424; GO:0043226; GO:0005622; GO:0044464…	metabolic process	mitochondrion;nucleus;organelle lumen	catalytic activity;RNA binding	rno01210; rno00020; rno01230; rno01100; rno00630; rno01200	0		5.22935e+07	5.23753e+07	5.36306e+07	5.08745e+07		0.0341723	-0.0419419	0.0761142		0.317039	0.284474	0.596224
High	Q9Z1P2	81634	ENSRNOG00000056756.1	Actn1	Alpha-actinin-1 [OS=Rattus norvegicus]	0	64	38	1814	23	1	892	102.9	8003.34	38	[GO:0001725]; GO:0042641; GO:0097517; GO:0015629; GO:0044430; GO:0032432; GO:0005856; GO:0044446; GO:0043232; GO:0043229; GO:0044422; GO:0044424; GO:0043228; GO:0043226; GO:0005575; GO:0005622; GO:0044464; GO:0005623 [GO:0001726]; GO:0031252; GO:0120025; GO:0044464; GO:0042995; GO:0005575; GO:0005623 [GO:0003725]; GO:0003723; GO:0003676; GO:0097159; GO:1901363; GO:0005488; GO:0003674 [GO:0003779]…	cell differentiation;cell organization and biogenesis;regulation of biological process	cytoplasm;cytoskeleton;cytosol;membrane;nucleus	metal ion binding;protein binding;RNA binding	rno04530; rno05203; rno04510; rno05322; rno05146; rno04520; rno04810; rno04670; rno05412	13		5.22923e+07	5.55211e+07	5.46365e+07	4.67192e+07		-0.0231722	-0.249021	0.225849		0.0454342	0.627083	1.92251
High	Q63028	24170		Add1	Alpha-adducin [OS=Rattus norvegicus]	0	61	30	1592	29	1	735	80.3	6761.36	30	[GO:0000902]; GO:0032989; GO:0009653; GO:0016043; GO:0048869; GO:0032502; GO:0048856; GO:0009987; GO:0071840; GO:0008150 [GO:0001701]; GO:0043009; GO:0009792; GO:0009790; GO:0007275; GO:0032501; GO:0048856; GO:0008150; GO:0032502 [GO:0003723]; GO:0003676; GO:0097159; GO:1901363; GO:0005488; GO:0003674 [GO:0003779]; GO:0008092; GO:0005515; GO:0005488; GO:0003674 [GO:0005198]; GO:0003674 [GO:000551…	cell differentiation;cell organization and biogenesis;cellular homeostasis;metabolic process;regulation of biological process;response to stimulus;transport	cytoplasm;cytoskeleton;membrane;nucleus	protein binding;RNA binding;structural molecule activity		1		5.1385e+07	5.03898e+07	5.16722e+07	5.20929e+07		0.0362562	0.0479537	-0.0116975		0.748229	0.666612	0.117166
High	P35213-1	56011	ENSRNOG00000010945.6	Ywhab	14-3-3 protein beta/alpha [OS=Rattus norvegicus]	0	67	13	2112	9	1	246	28	10296.6	13	[GO:0000186]; GO:0032147; GO:0043406; GO:0045860; GO:0043405; GO:0043410; GO:0071902; GO:0001934; GO:0033674; GO:0045859; GO:0043408; GO:0071900; GO:0000165; GO:1902533; GO:0001932; GO:0006468; GO:0031401; GO:0042327; GO:0043549; GO:0051347; GO:1902531; GO:0023014; GO:0035556; GO:0009967; GO:0031399; GO:0042325; GO:0006464; GO:0016310; GO:0032270; GO:0045937; GO:0051338; GO:0043085; GO:0009966; G…	cell organization and biogenesis;regulation of biological process;transport	cytoplasm;cytosol;membrane;nucleus	protein binding	rno05203; rno05161; rno05169; rno04151; rno04110; rno04114; rno04390	0		5.11808e+07	4.92444e+07	5.11502e+07	5.31477e+07		0.0547782	0.110045	-0.0552673		0.236431	0.496176	0.232325
High	Q6PCU2	297566		Atp6v1e1	V-type proton ATPase subunit E 1 [OS=Rattus norvegicus]	0	41	10	1105	10	1	226	26.1	4905.81	10	[GO:0005737]; GO:0044424; GO:0005622; GO:0044464; GO:0005575; GO:0005623 [GO:0005739]; GO:0043231; GO:0044444; GO:0043227; GO:0043229; GO:0005737; GO:0044424; GO:0043226; GO:0005622; GO:0044464; GO:0005575; GO:0005623 [GO:0005765]; GO:0005764; GO:0098852; GO:0000323; GO:0005774; GO:0005773; GO:0044437; GO:0098588; GO:0098805; GO:0043231; GO:0044444; GO:0044446; GO:0031090; GO:0016020; GO:0043227;…	transport	cytoplasm;cytosol;endosome;membrane;mitochondrion	catalytic activity;protein binding;transporter activity	rno04721; rno00190; rno05323; rno01100; rno04966; rno04150; rno04145	0		5.05054e+07	5.11456e+07	4.83355e+07	5.2035e+07		-0.0815273	0.0248718	-0.106399		0.871949	0.159692	1.20509
High	P68511	25576	ENSRNOG00000055471.1	Ywhah	14-3-3 protein eta [OS=Rattus norvegicus]	0	55	11	1616	10	1	246	28.2	7082.23	11	[GO:0002028]; GO:0006814; GO:0010959; GO:0015672; GO:0030001; GO:0043269; GO:0006812; GO:0006811; GO:0051049; GO:0006810; GO:0032879; GO:0051234; GO:0050789; GO:0051179; GO:0008150; GO:0065007 [GO:0003674] [GO:0003779]; GO:0008092; GO:0005515; GO:0005488; GO:0003674 [GO:0005515]; GO:0005488; GO:0003674 [GO:0005575] [GO:0005737]; GO:0044424; GO:0005622; GO:0044464; GO:0005575; GO:0005623 [GO:00058…	metabolic process;regulation of biological process;response to stimulus;transport	cytoplasm;membrane	protein binding	rno05203; rno05169; rno04151; rno04110; rno04114; rno04390	0		5.00428e+07	4.85868e+07	5.07182e+07	5.08234e+07		0.0619404	0.0649285	-0.00298808		0.377561	0.334288	0.0124774
High	Q9JLT0	79433		Myh10	Myosin-10 [OS=Rattus norvegicus]	0	39	60	2537	52	1	1976	228.8	12615.9	60	[GO:0000146]; GO:0003774; GO:0017111; GO:0016462; GO:0016818; GO:0016817; GO:0016787; GO:0003824; GO:0003674 [GO:0000166]; GO:0036094; GO:1901265; GO:0005488; GO:0097159; GO:1901363; GO:0003674 [GO:0000281]; GO:0061640; GO:1903047; GO:0000910; GO:0000278; GO:0022402; GO:0051301; GO:0007049; GO:0009987; GO:0008150 [GO:0001701]; GO:0043009; GO:0009792; GO:0009790; GO:0007275; GO:0032501; GO:0048856…	cell organization and biogenesis;cell proliferation;cellular component movement;metabolic process;regulation of biological process;transport	cytoplasm;membrane;nucleus	catalytic activity;motor activity;nucleotide binding;protein binding;transporter activity	rno04530; rno04810	7		4.92364e+07	5.0047e+07	5.03656e+07	4.72966e+07		0.00915376	-0.0815487	0.0907025		0.0529662	0.630349	1.5004
High	O35179	116743	ENSRNOG00000006761.7	Sh3gl2	Endophilin-A1 [OS=Rattus norvegicus]	0	54	10	1429	9	1	352	39.9	6688.9	10	[GO:0002090]; GO:0031323; GO:0031623; GO:0048259; GO:0060255; GO:0019222; GO:0044237; GO:0050794; GO:0006898; GO:0043112; GO:0030100; GO:0043170; GO:0008152; GO:0050789; GO:0009987; GO:0006897; GO:0044260; GO:0051128; GO:0060627; GO:0071704; GO:0008150; GO:0065007; GO:0016192; GO:0098657; GO:0016043; GO:0051049; GO:0006810; GO:0071840; GO:0032879; GO:0051234; GO:0051179 [GO:0005515]; GO:0005488; …	cell growth;cell organization and biogenesis;regulation of biological process;response to stimulus;transport	cytoplasm;endosome;membrane	protein binding	rno04144	1		4.84442e+07	4.76293e+07	5.04848e+07	4.72184e+07		0.0840015	-0.0124984	0.0964998		1.11823	0.0705566	0.836063
High	101				101	0.005	29	4	227	4	1	156	18	1053.7	4						0		4.75928e+07	4.66077e+07	4.74979e+07	4.86728e+07		0.0272975	0.0625474	-0.0352499		0.179335	0.614813	0.296199
High	P19804	83782	ENSRNOG00000002671.3	Nme2	nucleoside diphosphate kinase b [OS=Rattus norvegicus]	0	57	6	652	2	1	152	17.3	2932.25	6	[GO:0000166]; GO:0036094; GO:1901265; GO:0005488; GO:0097159; GO:1901363; GO:0003674 [GO:0001726]; GO:0031252; GO:0120025; GO:0044464; GO:0042995; GO:0005575; GO:0005623 [GO:0002762]; GO:0002573; GO:0002761; GO:0045638; GO:1902106; GO:0002521; GO:0030099; GO:0045637; GO:1902105; GO:0045596; GO:1903707; GO:0030097; GO:0030154; GO:0045595; GO:1903706; GO:0048523; GO:0051093; GO:0002683; GO:0051241;…	cell organization and biogenesis;cellular homeostasis;metabolic process;regulation of biological process;response to stimulus	cytoplasm;cytosol;membrane;mitochondrion;nucleus	catalytic activity;metal ion binding;nucleotide binding;protein binding	rno00230; rno01100; rno00240	4		4.74498e+07	4.64935e+07	4.6224e+07	4.96318e+07		-0.00838792	0.0942356	-0.102624		0.0801156	0.982031	1.1093
High	P97546-2	56064	ENSRNOG00000009029.7	Nptn	Neuroplastin [OS=Rattus norvegicus]	0	36	10	570	6	1	393	43.9	2443.03	10	[GO:0001934]; GO:0001932; GO:0006468; GO:0031401; GO:0042327; GO:0031399; GO:0042325; GO:0006464; GO:0016310; GO:0032270; GO:0045937; GO:0032268; GO:0019220; GO:0036211; GO:0044267; GO:0006796; GO:0031325; GO:0051247; GO:0010562; GO:0031323; GO:0051246; GO:0051174; GO:0019538; GO:0043412; GO:0044260; GO:0006793; GO:0009893; GO:0044237; GO:0048522; GO:0010604; GO:0051173; GO:0019222; GO:0050794; G…	cell communication;cell organization and biogenesis;cellular homeostasis;regulation of biological process;response to stimulus	cell surface;membrane	protein binding		3		4.74435e+07	4.59256e+07	4.66901e+07	4.97149e+07		0.0238182	0.114382	-0.0905638		0.132952	0.661645	0.529124
High	Q9JJM9-2	116728		Sept5	Isoform 2 of Septin-5 [OS=Rattus norvegicus]	0	52	12	607	12	1	378	43.9	2467.36	12	[GO:0001725]; GO:0042641; GO:0097517; GO:0015629; GO:0044430; GO:0032432; GO:0005856; GO:0044446; GO:0043232; GO:0043229; GO:0044422; GO:0044424; GO:0043228; GO:0043226; GO:0005575; GO:0005622; GO:0044464; GO:0005623 [GO:0003924]; GO:0017111; GO:0016462; GO:0016818; GO:0016817; GO:0016787; GO:0003824; GO:0003674 [GO:0005515]; GO:0005488; GO:0003674 [GO:0005525]; GO:0032550; GO:0032561; GO:0035639…	cell division;regulation of biological process	membrane	catalytic activity;nucleotide binding;protein binding		0		4.68943e+07	4.61593e+07	4.73891e+07	4.71344e+07		0.0379335	0.0301585	0.007775		0.291842	0.17512	0.0432649
High	P67779	25344	ENSRNOG00000046799.2	Phb	Prohibitin [OS=Rattus norvegicus]	0	70	14	1056	14	1	272	29.8	4927.46	14	[GO:0000122]; GO:0006357; GO:0006366; GO:0045892; GO:0006355; GO:0006351; GO:0010629; GO:1903507; GO:2000113; GO:0010468; GO:1903506; GO:2000112; GO:0010467; GO:0034645; GO:0097659; GO:0010605; GO:1902679; GO:0010558; GO:0031327; GO:0060255; GO:2001141; GO:0010556; GO:0031326; GO:0043170; GO:0009059; GO:0044249; GO:0044260; GO:0032774; GO:0009892; GO:0051253; GO:0009890; GO:0031324; GO:0019222; G…	cell differentiation;cell organization and biogenesis;metabolic process;regulation of biological process;response to stimulus	cell surface;cytoplasm;endosome;membrane;mitochondrion;nucleus	DNA binding;protein binding		0		4.65353e+07	4.66895e+07	4.98425e+07	4.30741e+07		0.0942798	-0.116277	0.210557		0.660185	0.506982	1.27869
High	P0C0S7	58940		H2afz	Histone H2A.Z [OS=Rattus norvegicus]	0.004	38	3	206	2	1	128	13.5	924.52	3	[GO:0000786]; GO:0000785; GO:0032993; GO:0044427; GO:0044815; GO:0032991; GO:0005694; GO:0044446; GO:0005575; GO:0043232; GO:0043229; GO:0044422; GO:0044424; GO:0043228; GO:0043226; GO:0005622; GO:0044464; GO:0005623 [GO:0000790]; GO:0000785; GO:0044454; GO:0044427; GO:0000228; GO:0044428; GO:0005694; GO:0044446; GO:0031981; GO:0005634; GO:0043232; GO:0043229; GO:0044422; GO:0044424; GO:0070013; …	regulation of biological process;response to stimulus	chromosome;nucleus	DNA binding;protein binding	rno05034; rno05322	1		4.63965e+07	4.60503e+07	5.28007e+07	4.03385e+07		0.197346	-0.191053	0.388399		0.335606	0.276607	0.991613
High	P30427-1	64204		Plec	plectin [OS=Rattus norvegicus]	0	28	82	2165	82	1	4687	533.2	9164.06	82	[GO:0003723]; GO:0003676; GO:0097159; GO:1901363; GO:0005488; GO:0003674 [GO:0003779]; GO:0008092; GO:0005515; GO:0005488; GO:0003674 [GO:0005200]; GO:0005198; GO:0003674 [GO:0005515]; GO:0005488; GO:0003674 [GO:0005737]; GO:0044424; GO:0005622; GO:0044464; GO:0005575; GO:0005623 [GO:0005829]; GO:0044444; GO:0005737; GO:0044424; GO:0005622; GO:0044464; GO:0005575; GO:0005623 [GO:0005856]; GO:0043…	cell differentiation;cell organization and biogenesis;response to stimulus	cytoplasm;cytoskeleton;cytosol;membrane	protein binding;RNA binding;structural molecule activity		0		4.63945e+07	4.49541e+07	4.98459e+07	4.43835e+07		0.149024	-0.0184289	0.167453		1.12762	0.0689724	1.12001
High	Q75Q39	304017		Tomm70a; Tomm70	Mitochondrial import receptor subunit TOM70 [OS=Rattus norvegicus]	0	50	18	2250	18	1	610	67.4	11132.5	18	[GO:0005515]; GO:0005488; GO:0003674 [GO:0005739]; GO:0043231; GO:0044444; GO:0043227; GO:0043229; GO:0005737; GO:0044424; GO:0043226; GO:0005622; GO:0044464; GO:0005575; GO:0005623 [GO:0005741]; GO:0031966; GO:0031968; GO:0005740; GO:0031090; GO:0044429; GO:0019867; GO:0031967; GO:0044424; GO:0098588; GO:0098805; GO:0016020; GO:0043227; GO:0044422; GO:0005739; GO:0044444; GO:0044446; GO:0031975;…	transport	membrane;mitochondrion	protein binding		0		4.62992e+07	4.56204e+07	4.88683e+07	4.44088e+07		0.0992187	-0.0388364	0.138055		1.35747	0.265826	1.37181
High	P20788	291103	ENSRNOG00000018281.6	Uqcrfs1	cytochrome b-c1 complex subunit Rieske, mitochondrial [OS=Rattus norvegicus]	0	68	12	716	12	1	274	29.4	3425.01	12	[GO:0005739]; GO:0043231; GO:0044444; GO:0043227; GO:0043229; GO:0005737; GO:0044424; GO:0043226; GO:0005622; GO:0044464; GO:0005575; GO:0005623 [GO:0005743]; GO:0019866; GO:0031966; GO:0031090; GO:0031967; GO:0044424; GO:0005740; GO:0044429; GO:0016020; GO:0043227; GO:0044422; GO:0031975; GO:0044446; GO:0005622; GO:0044464; GO:0005739; GO:0044444; GO:0005575; GO:0043226; GO:0043229; GO:0005623; …	metabolic process;response to stimulus;transport	membrane;mitochondrion	catalytic activity;metal ion binding;protein binding;transporter activity	rno05010; rno00190; rno01100; rno05012; rno04932; rno04260; rno05016	0		4.6213e+07	4.58417e+07	4.93484e+07	4.3449e+07		0.106343	-0.0773359	0.183679		0.696858	0.34719	1.12279
High	P97846	84008	ENSRNOG00000020277.6	Cntnap1	Contactin-associated protein 1 [OS=Rattus norvegicus]	0	27	23	689	23	1	1381	155.8	3114.93	23	[GO:0002175]; GO:0034613; GO:0099612; GO:0008104; GO:0070727; GO:0033036; GO:0051641; GO:0051179; GO:0008150 [GO:0005515]; GO:0005488; GO:0003674 [GO:0007010]; GO:0006996; GO:0016043; GO:0009987; GO:0071840; GO:0008150 [GO:0007155]; GO:0022610; GO:0008150 [GO:0008076]; GO:0005887; GO:0034705; GO:0044459; GO:0016021; GO:0031226; GO:0034703; GO:0005886; GO:0044425; GO:0044464; GO:0031224; GO:003470…	cell organization and biogenesis	membrane	protein binding	rno04514	0		4.56372e+07	4.66169e+07	4.44485e+07	4.58461e+07		-0.0687163	-0.0240541	-0.0446621		0.818439	0.189597	0.421981
High	Q4V7C7	81732	ENSRNOG00000003206.7	Actr3	actin-related protein 3 [OS=Rattus norvegicus]	0	62	16	1612	16	1	418	47.3	7040.03	16	[GO:0000139]; GO:0044431; GO:0098588; GO:0098791; GO:0005794; GO:0044444; GO:0044446; GO:0031090; GO:0031984; GO:0012505; GO:0043231; GO:0005737; GO:0044424; GO:0043229; GO:0044422; GO:0016020; GO:0043227; GO:0044464; GO:0005622; GO:0043226; GO:0005575; GO:0005623 [GO:0000166]; GO:0036094; GO:1901265; GO:0005488; GO:0097159; GO:1901363; GO:0003674 [GO:0001726]; GO:0031252; GO:0120025; GO:0044464;…	cell differentiation;cell division;cell organization and biogenesis;cellular component movement;regulation of biological process;response to stimulus	cytoplasm;cytoskeleton;membrane	nucleotide binding;protein binding;structural molecule activity		0		4.56311e+07	4.52863e+07	4.62032e+07	4.54037e+07		0.0289198	0.00373423	0.0251856		0.410706	0.0233672	0.193364
High	P06761	25617	ENSRNOG00000018294.6	Hspa5	78 kDa glucose-regulated protein [OS=Rattus norvegicus]	0	50	24	1929	22	1	654	72.3	8803.14	24	[GO:0000166]; GO:0036094; GO:1901265; GO:0005488; GO:0097159; GO:1901363; GO:0003674 [GO:0000902]; GO:0032989; GO:0009653; GO:0016043; GO:0048869; GO:0032502; GO:0048856; GO:0009987; GO:0071840; GO:0008150 [GO:0005515]; GO:0005488; GO:0003674 [GO:0005524]; GO:0032559; GO:0035639; GO:0030554; GO:0032555; GO:0043168; GO:1901265; GO:0017076; GO:0032553; GO:0043167; GO:0097159; GO:1901363; GO:0000166…	cell communication;cell death;cell differentiation;cell organization and biogenesis;metabolic process;regulation of biological process;response to stimulus;transport	cell surface;cytoplasm;endoplasmic reticulum;membrane;mitochondrion;nucleus;organelle lumen	catalytic activity;nucleotide binding;protein binding	rno05020; rno04612; rno04141; rno03060; rno04918	0		4.55012e+07	4.56245e+07	4.44896e+07	4.63897e+07		-0.0363396	0.0239949	-0.0603345		0.22506	0.114693	0.391538
High	P16884	24587		Nefh	Neurofilament heavy polypeptide [OS=Rattus norvegicus]	0	25	22	1514	21	1	1072	115.3	6972.98	22	[GO:0000226]; GO:0007010; GO:0007017; GO:0006996; GO:0009987; GO:0016043; GO:0008150; GO:0071840 [GO:0001552]; GO:0003006; GO:0008585; GO:0022414; GO:0032502; GO:0008406; GO:0046545; GO:0000003; GO:0008150; GO:0045137; GO:0048513; GO:0048608; GO:0046660; GO:0007275; GO:0007548; GO:0048731; GO:0048856; GO:0061458; GO:0032501 [GO:0005198]; GO:0003674 [GO:0005200]; GO:0005198; GO:0003674 [GO:0005634…	cell organization and biogenesis;regulation of biological process;response to stimulus	cytoplasm;mitochondrion;nucleus	protein binding;structural molecule activity		0		4.53048e+07	4.08287e+07	4.54166e+07	4.96691e+07		0.153635	0.282764	-0.129129		0.721704	0.557502	0.220765
High	P20717	29511		Padi2	Protein-arginine deiminase type-2 [OS=Rattus norvegicus]	0.01	17	6	65	6	1	665	75.3	253.22	6	[GO:0004668]; GO:0016813; GO:0016810; GO:0016787; GO:0003824; GO:0003674 [GO:0005509]; GO:0046872; GO:0043169; GO:0043167; GO:0005488; GO:0003674 [GO:0005634]; GO:0043231; GO:0043227; GO:0043229; GO:0043226; GO:0044424; GO:0005575; GO:0005622; GO:0044464; GO:0005623 [GO:0005737]; GO:0044424; GO:0005622; GO:0044464; GO:0005575; GO:0005623 [GO:0010848]; GO:0001672; GO:0031498; GO:0006333; GO:190227…	cell organization and biogenesis;metabolic process;regulation of biological process;response to stimulus	cytoplasm;nucleus	catalytic activity;metal ion binding;protein binding		0		4.51472e+07	4.40299e+07	4.26736e+07	4.8738e+07		-0.0451395	0.146564	-0.191703		0.411469	1.22941	1.79248
High	P97685	116690	ENSRNOG00000030515.6	Nfasc	Neurofascin [OS=Rattus norvegicus]	0	32	27	1744	2	1	1240	137.9	7846.84	27	[GO:0002175]; GO:0034613; GO:0099612; GO:0008104; GO:0070727; GO:0033036; GO:0051641; GO:0051179; GO:0008150 [GO:0005515]; GO:0005488; GO:0003674 [GO:0005622]; GO:0044464; GO:0005575; GO:0005623 [GO:0005886]; GO:0016020; GO:0044464; GO:0071944; GO:0005575; GO:0005623 [GO:0005925]; GO:0005924; GO:0005912; GO:0030055; GO:0070161; GO:0030054; GO:0005575 [GO:0007155]; GO:0022610; GO:0008150 [GO:00074…	cell organization and biogenesis;cellular component movement	membrane	protein binding	rno04514	25		4.50528e+07	4.52511e+07	4.58086e+07	4.40987e+07		0.0176654	-0.0372178	0.0548832		0.258853	0.529657	0.789735
High	Q6P6V0	292804	ENSRNOG00000023150.5	Gpi	glucose-6-phosphate isomerase [OS=Rattus norvegicus]	0	27	13	1079	13	1	558	62.8	4993.98	13	[GO:0001525]; GO:0048514; GO:0048646; GO:0001568; GO:0009653; GO:0032502; GO:0001944; GO:0048856; GO:0008150; GO:0048731; GO:0072358; GO:0007275; GO:0072359; GO:0032501 [GO:0001701]; GO:0043009; GO:0009792; GO:0009790; GO:0007275; GO:0032501; GO:0048856; GO:0008150; GO:0032502 [GO:0001707]; GO:0001704; GO:0048332; GO:0007369; GO:0048646; GO:0007498; GO:0048729; GO:0048598; GO:0009653; GO:0032502;…	metabolic process;regulation of biological process;response to stimulus	cytoplasm;cytosol;extracellular;membrane	catalytic activity;protein binding	rno00010; rno00030; rno00500; rno01100; rno00520; rno01200	0		4.46492e+07	4.40843e+07	4.28178e+07	4.70454e+07		-0.0420557	0.0937873	-0.135843		0.352552	0.848549	1.3368
High	P32851	116470	ENSRNOG00000029165.2	Stx1a	syntaxin-1A [OS=Rattus norvegicus]	0	56	15	1267	15	1	288	33	6270.02	15	[GO:0000149]; GO:0005515; GO:0005488; GO:0003674 [GO:0001956]; GO:0007269; GO:0046928; GO:0050806; GO:0051590; GO:1903532; GO:0001505; GO:0006836; GO:0051649; GO:0099531; GO:0099643; GO:0050804; GO:0051588; GO:0060341; GO:1903530; GO:0007268; GO:0010647; GO:0023056; GO:0051050; GO:0032940; GO:0048522; GO:0051047; GO:0065008; GO:0006810; GO:0051234; GO:0051641; GO:0008150; GO:0023061; GO:0099536; …	cell organization and biogenesis;regulation of biological process;response to stimulus;transport	membrane	protein binding	rno04721; rno04130; rno05031; rno04911	0		4.45412e+07	4.39546e+07	4.44184e+07	4.52506e+07		0.0151427	0.0419211	-0.0267784		0.0654365	0.18326	0.108057
High	B3GNI6-2	305227	ENSRNOG00000002182.7	Sept11	Isoform 2 of Septin-11 [OS=Rattus norvegicus]	0	50	16	1378	15	1	432	49.8	6572.48	16	[GO:0001725]; GO:0042641; GO:0097517; GO:0015629; GO:0044430; GO:0032432; GO:0005856; GO:0044446; GO:0043232; GO:0043229; GO:0044422; GO:0044424; GO:0043228; GO:0043226; GO:0005575; GO:0005622; GO:0044464; GO:0005623 [GO:0005525]; GO:0032550; GO:0032561; GO:0035639; GO:0001883; GO:0032549; GO:0019001; GO:0032555; GO:0043168; GO:1901265; GO:0001882; GO:0017076; GO:0032553; GO:0043167; GO:0097159; …	cell division;cell organization and biogenesis	cytoplasm	nucleotide binding	rno05100	1		4.44243e+07	4.43876e+07	4.44964e+07	4.43888e+07		0.00353215	3.9702e-05	0.00349245		0.025389	0.000227661	0.0214763
High	Q62950	25415	ENSRNOG00000004781.6	Crmp1	Dihydropyrimidinase-related protein 1 [OS=Rattus norvegicus]	0	60	18	2205	16	1	572	62.2	10281.1	18	[GO:0000226]; GO:0007010; GO:0007017; GO:0006996; GO:0009987; GO:0016043; GO:0008150; GO:0071840 [GO:0005737]; GO:0044424; GO:0005622; GO:0044464; GO:0005575; GO:0005623 [GO:0005815]; GO:0015630; GO:0044430; GO:0005856; GO:0044446; GO:0043232; GO:0043229; GO:0044422; GO:0044424; GO:0043228; GO:0043226; GO:0005575; GO:0005622; GO:0044464; GO:0005623 [GO:0005819]; GO:0015630; GO:0043232; GO:0044430…	cell organization and biogenesis;cellular component movement;regulation of biological process;response to stimulus	cytoplasm;cytoskeleton;cytosol	catalytic activity;protein binding		0		4.42898e+07	4.36366e+07	4.27487e+07	4.64841e+07		-0.0296592	0.0911996	-0.120859		0.185817	0.460695	0.74273
High	Q9R1Z0-2	83532		Vdac3	Isoform 2 of Voltage-dependent anion-selective channel protein 3 [OS=Rattus norvegicus]	0	46	9	927	8	1	284	30.9	4166.09	9	[GO:0000166]; GO:0036094; GO:1901265; GO:0005488; GO:0097159; GO:1901363; GO:0003674 [GO:0001662]; GO:0002209; GO:0042596; GO:0006952; GO:0007610; GO:0033555; GO:0006950; GO:0008150; GO:0032501; GO:0050896 [GO:0005634]; GO:0043231; GO:0043227; GO:0043229; GO:0043226; GO:0044424; GO:0005575; GO:0005622; GO:0044464; GO:0005623 [GO:0005739]; GO:0043231; GO:0044444; GO:0043227; GO:0043229; GO:0005737…	cell communication;defense response;regulation of biological process;response to stimulus;transport	endoplasmic reticulum;membrane;mitochondrion;nucleus	nucleotide binding;transporter activity		0		4.37308e+07	4.24588e+07	4.503e+07	4.37035e+07		0.0848249	0.0416873	0.0431376		0.364881	0.159143	0.22241
High	B0K020	294362	ENSRNOG00000000610.6	Cisd1	CDGSH iron-sulfur domain-containing protein 1 [OS=Rattus norvegicus]	0	36	3	445	3	1	108	12.1	1985.74	3	[GO:0005739]; GO:0043231; GO:0044444; GO:0043227; GO:0043229; GO:0005737; GO:0044424; GO:0043226; GO:0005622; GO:0044464; GO:0005575; GO:0005623 [GO:0005741]; GO:0031966; GO:0031968; GO:0005740; GO:0031090; GO:0044429; GO:0019867; GO:0031967; GO:0044424; GO:0098588; GO:0098805; GO:0016020; GO:0043227; GO:0044422; GO:0005739; GO:0044444; GO:0044446; GO:0031975; GO:0005622; GO:0044464; GO:0005575; …	regulation of biological process	membrane;mitochondrion	metal ion binding;protein binding		0		4.35346e+07	4.38949e+07	4.45703e+07	4.21386e+07		0.0220282	-0.0589125	0.0809407		0.138205	0.363073	0.77229
High	P46462	116643	ENSRNOG00000034242.3	Vcp	Transitional endoplasmic reticulum ATPase [OS=Rattus norvegicus]	0	62	34	1813	34	1	806	89.3	8061.7	34	[GO:0000166]; GO:0036094; GO:1901265; GO:0005488; GO:0097159; GO:1901363; GO:0003674 [GO:0000502]; GO:0043234; GO:0044424; GO:1905369; GO:0032991; GO:0005622; GO:0044464; GO:1905368; GO:0005575; GO:0005623; GO:1902494 [GO:0003678]; GO:0004386; GO:0140097; GO:0017111; GO:0003824; GO:0016462; GO:0003674; GO:0016818; GO:0016817; GO:0016787 [GO:0003723]; GO:0003676; GO:0097159; GO:1901363; GO:0005488…	cell communication;cell organization and biogenesis;metabolic process;regulation of biological process;response to stimulus;transport	cytoplasm;cytosol;endoplasmic reticulum;membrane;nucleus;proteasome	catalytic activity;enzyme regulator activity;nucleotide binding;protein binding;RNA binding	rno05134; rno04141	0		4.32918e+07	4.31496e+07	4.21641e+07	4.45616e+07		-0.0333334	0.0464551	-0.0797884		0.439241	0.392525	0.782068
High	Q5XI78	360975; 103693780	ENSRNOG00000005130.7	Ogdh; LOC103693780	2-oxoglutarate dehydrogenase, mitochondrial [OS=Rattus norvegicus]	0	45	33	2026	33	1	1023	116.2	9172.48	33	[GO:0004591]; GO:0016624; GO:0016903; GO:0016491; GO:0003824; GO:0003674 [GO:0005739]; GO:0043231; GO:0044444; GO:0043227; GO:0043229; GO:0005737; GO:0044424; GO:0043226; GO:0005622; GO:0044464; GO:0005575; GO:0005623 [GO:0005759]; GO:0044429; GO:0070013; GO:0005739; GO:0044444; GO:0044446; GO:0043229; GO:0043233; GO:0044424; GO:0043231; GO:0005737; GO:0044422; GO:0043226; GO:0031974; GO:0005622;…	cellular component movement;metabolic process	cytosol;membrane;mitochondrion;organelle lumen	catalytic activity;metal ion binding;protein binding	rno00310; rno00020; rno00380; rno01100; rno01200	0		4.30681e+07	4.31269e+07	4.27882e+07	4.32892e+07		-0.0113725	0.00541962	-0.0167921		0.105012	0.0420033	0.178329
High	P31016-1	29495	ENSRNOG00000018526.7	Dlg4	Disks large homolog 4 [OS=Rattus norvegicus]	0	47	24	1313	23	1	724	80.4	5709.74	24	[GO:0002091]; GO:0002090; GO:0010605; GO:0031324; GO:0031623; GO:0048261; GO:0031323; GO:0048259; GO:0060255; GO:0009892; GO:0043170; GO:0044237; GO:0048523; GO:0006898; GO:0043112; GO:0045806; GO:0019222; GO:0050794; GO:0030100; GO:0008152; GO:0048519; GO:0071704; GO:0009987; GO:0006897; GO:0044260; GO:0051051; GO:0051129; GO:0050789; GO:0051128; GO:0060627; GO:0008150; GO:0016192; GO:0098657; G…	cell organization and biogenesis;cellular homeostasis;metabolic process;regulation of biological process;response to stimulus	cytoplasm;cytoskeleton;cytosol;endoplasmic reticulum;membrane	catalytic activity;protein binding	rno05030; rno04724; rno05016; rno04390	1		4.2693e+07	4.19502e+07	4.65847e+07	3.95442e+07		0.15118	-0.0852091	0.236389		2.17063	0.500994	2.23527
High	Q68FX0	94173	ENSRNOG00000007316.6	Idh3B	isocitrate dehydrogenase [NAD] subunit beta, mitochondrial [OS=Rattus norvegicus]	0	43	14	871	14	1	385	42.3	3809.79	14	[GO:0000287]; GO:0046872; GO:0043169; GO:0043167; GO:0005488; GO:0003674 [GO:0004449]; GO:0004448; GO:0016616; GO:0016614; GO:0016491; GO:0003824; GO:0003674 [GO:0005634]; GO:0043231; GO:0043227; GO:0043229; GO:0043226; GO:0044424; GO:0005575; GO:0005622; GO:0044464; GO:0005623 [GO:0005739]; GO:0043231; GO:0044444; GO:0043227; GO:0043229; GO:0005737; GO:0044424; GO:0043226; GO:0005622; GO:0044464…	metabolic process	mitochondrion;nucleus	catalytic activity;metal ion binding;nucleotide binding	rno01210; rno00020; rno01230; rno01100; rno01200	0		4.23392e+07	4.22687e+07	4.24495e+07	4.22994e+07		0.00615578	0.00104786	0.00510792		0.040711	0.00688916	0.0361746
High	Q794F9	50567		Slc3a2	4F2 cell-surface antigen heavy chain [OS=Rattus norvegicus]	0	42	14	1724	14	1	527	58	7992.16	14	[GO:0003723]; GO:0003676; GO:0097159; GO:1901363; GO:0005488; GO:0003674 [GO:0003725]; GO:0003723; GO:0003676; GO:0097159; GO:1901363; GO:0005488; GO:0003674 [GO:0003824]; GO:0003674 [GO:0005634]; GO:0043231; GO:0043227; GO:0043229; GO:0043226; GO:0044424; GO:0005575; GO:0005622; GO:0044464; GO:0005623 [GO:0005829]; GO:0044444; GO:0005737; GO:0044424; GO:0005622; GO:0044464; GO:0005575; GO:000562…	metabolic process;response to stimulus;transport	cell surface;cytosol;membrane;nucleus	catalytic activity;protein binding;RNA binding;transporter activity	rno04974; rno04150	0		4.14511e+07	4.15701e+07	4.25769e+07	4.02063e+07		0.0345249	-0.0481242	0.0826491		0.254504	0.380168	0.617133
High	P30009	25603		Marcks	Myristoylated alanine-rich C-kinase substrate [OS=Rattus norvegicus]	0	63	16	1776	16	1	309	29.8	8479.82	16	[GO:0001520]; GO:0036126; GO:0044441; GO:0097223; GO:0099513; GO:0097729; GO:0005929; GO:0044422; GO:0120038; GO:0044464; GO:0044430; GO:0099512; GO:0031514; GO:0043226; GO:0120025; GO:0005575; GO:0044463; GO:0005623; GO:0005856; GO:0044446; GO:0099081; GO:0042995; GO:0043232; GO:0043229; GO:0044424; GO:0099080; GO:0043228; GO:0005622 [GO:0001786]; GO:0005543; GO:0072341; GO:0008289; GO:0043168; …	cell organization and biogenesis;regulation of biological process;transport	cytoplasm;cytoskeleton;cytosol;membrane;nucleus;vacuole	protein binding		0		4.13745e+07	4.06723e+07	3.94247e+07	4.40265e+07		-0.0449458	0.114327	-0.159272		0.157881	0.394369	0.635908
High	P85834	293481	ENSRNOG00000018604.6	Tufm	elongation factor Tu, mitochondrial [OS=Rattus norvegicus]	0	50	16	902	16	1	452	49.5	3967.36	16	[GO:0000166]; GO:0036094; GO:1901265; GO:0005488; GO:0097159; GO:1901363; GO:0003674 [GO:0003723]; GO:0003676; GO:0097159; GO:1901363; GO:0005488; GO:0003674 [GO:0003746]; GO:0008135; GO:0003723; GO:0003676; GO:0097159; GO:1901363; GO:0005488; GO:0003674 [GO:0003924]; GO:0017111; GO:0016462; GO:0016818; GO:0016817; GO:0016787; GO:0003824; GO:0003674 [GO:0005525]; GO:0032550; GO:0032561; GO:003563…	metabolic process;response to stimulus	membrane;mitochondrion	catalytic activity;nucleotide binding;RNA binding		0		4.1371e+07	4.05216e+07	4.29707e+07	4.06207e+07		0.0846625	0.00352584	0.0811367		1.23867	0.0241119	1.03503
High	P63086	116590	ENSRNOG00000001849.7	Mapk1	mitogen-activated protein kinase 1 [OS=Rattus norvegicus]	0	60	15	713	12	1	358	41.2	3520.89	15	[GO:0000165]; GO:0023014; GO:0035556; GO:0006468; GO:0007165; GO:0006464; GO:0016310; GO:0007154; GO:0009987; GO:0023052; GO:0050794; GO:0051716; GO:0036211; GO:0044267; GO:0006796; GO:0008150; GO:0050789; GO:0050896; GO:0019538; GO:0043412; GO:0044260; GO:0006793; GO:0065007; GO:0043170; GO:0044238; GO:1901564; GO:0044237; GO:0071704; GO:0008152; GO:0006807 [GO:0000166]; GO:0036094; GO:1901265; …	cell communication;cell death;cell differentiation;cell proliferation;cellular homeostasis;metabolic process;regulation of biological process;response to stimulus;transport	cytoplasm;cytoskeleton;cytosol;endosome;Golgi;membrane;mitochondrion;nucleus	catalytic activity;nucleotide binding;protein binding;signal transducer activity	rno04921; rno04912; rno05213; rno04010; rno05034; rno04012; rno05020; rno04071; rno04662; rno04261; rno05203; rno05010; rno04210; rno04960; rno04722; rno04360; rno04540; rno05214; rno05142; rno05161; rno04933; rno04510; rno04723; rno04015; rno04370; rno01524; rno05215; rno05133; rno04024; rno05152; rno05164; rno04917; rno04666; rno04660; rno04520; rno05230; rno05211; rno05231; rno04620; rno04650;…	3		4.12751e+07	4.11999e+07	4.29025e+07	3.97229e+07		0.0584215	-0.0526705	0.111092		0.836696	0.473731	1.24632
High	P04631	25742	ENSRNOG00000001295.2	S100b	Protein S100-B [OS=Rattus norvegicus]	0.005	84	5	246	5	1	92	10.7	1298.92	5	[GO:0001726]; GO:0031252; GO:0120025; GO:0044464; GO:0042995; GO:0005575; GO:0005623 [GO:0005102]; GO:0005515; GO:0005488; GO:0003674 [GO:0005509]; GO:0046872; GO:0043169; GO:0043167; GO:0005488; GO:0003674 [GO:0005515]; GO:0005488; GO:0003674 [GO:0005615]; GO:0044421; GO:0005575; GO:0005576 [GO:0005634]; GO:0043231; GO:0043227; GO:0043229; GO:0043226; GO:0044424; GO:0005575; GO:0005622; GO:00444…	cell differentiation;regulation of biological process;response to stimulus	cytoplasm;nucleus	metal ion binding;protein binding		0		4.07781e+07	4.07188e+07	4.02567e+07	4.13589e+07		-0.0164642	0.0225019	-0.0389661		0.0920416	0.133663	0.265481
High	P11598	29468		Pdia3	Protein disulfide-isomerase A3 [OS=Rattus norvegicus]	0	52	24	830	24	1	505	56.6	3397.97	24	[GO:0001666]; GO:0006950; GO:0036293; GO:0050896; GO:0070482; GO:0008150; GO:0009628 [GO:0001669]; GO:0030141; GO:0097223; GO:0012505; GO:0099503; GO:0044464; GO:0031410; GO:0005575; GO:0005623; GO:0044444; GO:0097708; GO:0005737; GO:0044424; GO:0031982; GO:0043229; GO:0005622; GO:0043227; GO:0043226 [GO:0002931]; GO:0006950; GO:0050896; GO:0008150 [GO:0003723]; GO:0003676; GO:0097159; GO:1901363…	cell communication;cellular homeostasis;metabolic process;regulation of biological process;response to stimulus	cell surface;cytoplasm;endoplasmic reticulum;extracellular;membrane;mitochondrion;nucleus;organelle lumen	catalytic activity;protein binding;RNA binding	rno04612; rno04141	0		4.07289e+07	3.94588e+07	3.9412e+07	4.33159e+07		-0.00170936	0.134551	-0.13626		0.00712054	0.99859	0.825332
High	Q62634-2	116638	ENSRNOG00000020650.7	Slc17a7	Isoform 2 of Vesicular glutamate transporter 1 [OS=Rattus norvegicus]	0	28	11	1425	9	1	585	64.3	6692.08	11	[GO:0003407]; GO:0048856; GO:0060041; GO:0032502; GO:0043010; GO:0008150; GO:0001654; GO:0007423; GO:0048513; GO:0048731; GO:0007275; GO:0032501 [GO:0005315]; GO:0015291; GO:0022804; GO:0022857; GO:0005215; GO:0003674 [GO:0006817]; GO:0015698; GO:0006820; GO:0006811; GO:0006810; GO:0051234; GO:0051179; GO:0008150 [GO:0007268]; GO:0098916; GO:0099537; GO:0099536; GO:0007267; GO:0007154; GO:0023052…	cell communication;cellular homeostasis;response to stimulus;transport	membrane	transporter activity		3		4.06365e+07	4.13223e+07	4.20958e+07	3.84914e+07		0.0267561	-0.102386	0.129142		0.215358	0.730514	0.941853
High	P63100-2	29748		Ppp3r1	Isoform 2 of Calcineurin subunit B type 1 [OS=Rattus norvegicus]	0	54	11	1378	11	1	216	25	6403.43	11	[GO:0001569]; GO:0001525; GO:0048754; GO:0048514; GO:0048646; GO:0035239; GO:0060562; GO:0061138; GO:0001568; GO:0009653; GO:0032502; GO:0035295; GO:0002009; GO:0001763; GO:0001944; GO:0048856; GO:0008150; GO:0007275; GO:0048729; GO:0060429; GO:0032501; GO:0048731; GO:0072358; GO:0009888; GO:0072359 [GO:0001837]; GO:0048762; GO:0030154; GO:0060485; GO:0048869; GO:0009888; GO:0048513; GO:0009987; …	cell differentiation;cell organization and biogenesis;metabolic process;regulation of biological process;response to stimulus;transport	cytosol;membrane	catalytic activity;metal ion binding;protein binding		0		4.05899e+07	4.03172e+07	4.11995e+07	4.02529e+07		0.0312314	-0.00230072	0.0335321		0.313294	0.012602	0.220496
High	P08050	24392	ENSRNOG00000000805.6	Gja1	Gap junction alpha-1 protein [OS=Rattus norvegicus]	0	39	10	506	10	1	382	43	2360.45	10	[GO:0000139]; GO:0044431; GO:0098588; GO:0098791; GO:0005794; GO:0044444; GO:0044446; GO:0031090; GO:0031984; GO:0012505; GO:0043231; GO:0005737; GO:0044424; GO:0043229; GO:0044422; GO:0016020; GO:0043227; GO:0044464; GO:0005622; GO:0043226; GO:0005575; GO:0005623 [GO:0001649]; GO:0001503; GO:0030154; GO:0032501; GO:0048869; GO:0008150; GO:0009987; GO:0032502 [GO:0001701]; GO:0043009; GO:0009792;…	cell communication;cell death;cell differentiation;cell organization and biogenesis;cellular component movement;cellular homeostasis;defense response;regulation of biological process;response to stimulus;transport	cytoplasm;cytosol;endoplasmic reticulum;endosome;Golgi;membrane;mitochondrion;vacuole	protein binding;signal transducer activity;transporter activity	rno04540; rno05412	0		4.00776e+07	4.03557e+07	3.95996e+07	4.02776e+07		-0.0272859	-0.00279313	-0.0244928		0.147158	0.0139183	0.116509
High	P97700	64201		Slc25a11	Mitochondrial 2-oxoglutarate/malate carrier protein [OS=Rattus norvegicus]	0	47	11	520	11	1	314	34.2	2206.25	11	[GO:0003723]; GO:0003676; GO:0097159; GO:1901363; GO:0005488; GO:0003674 [GO:0005215]; GO:0003674 [GO:0005634]; GO:0043231; GO:0043227; GO:0043229; GO:0043226; GO:0044424; GO:0005575; GO:0005622; GO:0044464; GO:0005623 [GO:0005739]; GO:0043231; GO:0044444; GO:0043227; GO:0043229; GO:0005737; GO:0044424; GO:0043226; GO:0005622; GO:0044464; GO:0005575; GO:0005623 [GO:0005743]; GO:0019866; GO:003196…	transport	membrane;mitochondrion;nucleus	RNA binding;transporter activity		0		3.98136e+07	3.93516e+07	4.48363e+07	3.5253e+07		0.188246	-0.158674	0.34692		1.04445	0.664801	2.76297
High	P28023	29167		Dctn1	Dynactin subunit 1 [OS=Rattus norvegicus]	0	34	29	915	29	1	1280	141.8	4077.03	29	[GO:0000132]; GO:0040001; GO:0051294; GO:0051293; GO:1902850; GO:0030010; GO:0000226; GO:0051649; GO:0051653; GO:0051656; GO:1903047; GO:0007163; GO:0007010; GO:0007017; GO:0051234; GO:0051641; GO:0022402; GO:0051640; GO:0000278; GO:0009987; GO:0006996; GO:0051179; GO:0007049; GO:0008150; GO:0016043; GO:0071840 [GO:0000776]; GO:0000775; GO:0043232; GO:0043234; GO:0044427; GO:0098687; GO:0043228; …	cell division;cell organization and biogenesis;cellular component movement;regulation of biological process;transport	chromosome;cytoplasm;cytoskeleton;cytosol;membrane;nucleus	catalytic activity;motor activity;protein binding	rno04962; rno05016	0		3.94224e+07	3.8862e+07	4.10236e+07	3.83814e+07		0.0780943	-0.0179538	0.0960481		0.416531	0.0706072	0.501548
High	P82471	81666		Gnaq	Guanine nucleotide-binding protein G(Q) subunit alpha [OS=Rattus norvegicus]	0	47	15	1117	10	1	359	42.1	5035.1	15	[GO:0000166]; GO:0036094; GO:1901265; GO:0005488; GO:0097159; GO:1901363; GO:0003674 [GO:0001501]; GO:0048731; GO:0007275; GO:0048856; GO:0032501; GO:0032502; GO:0008150 [GO:0001508]; GO:0042391; GO:0065008; GO:0065007; GO:0008150 [GO:0001664]; GO:0005102; GO:0005515; GO:0005488; GO:0003674 [GO:0003924]; GO:0017111; GO:0016462; GO:0016818; GO:0016817; GO:0016787; GO:0003824; GO:0003674 [GO:000487…	cell organization and biogenesis;regulation of biological process;response to stimulus	cytosol;membrane;nucleus	catalytic activity;enzyme regulator activity;metal ion binding;nucleotide binding;protein binding;signal transducer activity	rno04921; rno04912; rno04972; rno04020; rno04071; rno04261; rno04961; rno05010; rno04540; rno05142; rno04723; rno04015; rno05146; rno04724; rno04915; rno04924; rno04725; rno05200; rno04611; rno04918; rno04730; rno04916; rno04922; rno04713; rno04925; rno04270; rno04971; rno04970; rno04750; rno04726; rno04911; rno05143; rno04022; rno04720; rno04728; rno05016	5		3.92963e+07	3.98122e+07	4.03184e+07	3.77583e+07		0.0182299	-0.0764163	0.0946461		0.164234	0.520241	0.680148
High	P05712	65158		Rab2a	Ras-related protein Rab-2A [OS=Rattus norvegicus]	0	59	11	543	11	1	212	23.5	2436.9	11	[GO:0000139]; GO:0044431; GO:0098588; GO:0098791; GO:0005794; GO:0044444; GO:0044446; GO:0031090; GO:0031984; GO:0012505; GO:0043231; GO:0005737; GO:0044424; GO:0043229; GO:0044422; GO:0016020; GO:0043227; GO:0044464; GO:0005622; GO:0043226; GO:0005575; GO:0005623 [GO:0000166]; GO:0036094; GO:1901265; GO:0005488; GO:0097159; GO:1901363; GO:0003674 [GO:0003924]; GO:0017111; GO:0016462; GO:0016818;…	cell organization and biogenesis;regulation of biological process;response to stimulus;transport	endoplasmic reticulum;Golgi;membrane;nucleus	catalytic activity;nucleotide binding	rno04152	0		3.91951e+07	3.78632e+07	3.95638e+07	4.01584e+07		0.0633881	0.0849057	-0.0215176		0.393517	0.46107	0.0937454
High	Q6RUV5	363875	ENSRNOG00000001068.7	Rac1	Ras-related C3 botulinum toxin substrate 1 [OS=Rattus norvegicus]	0.006	41	6	382	5	1	192	21.4	1474.57	6	[GO:0000139]; GO:0044431; GO:0098588; GO:0098791; GO:0005794; GO:0044444; GO:0044446; GO:0031090; GO:0031984; GO:0012505; GO:0043231; GO:0005737; GO:0044424; GO:0043229; GO:0044422; GO:0016020; GO:0043227; GO:0044464; GO:0005622; GO:0043226; GO:0005575; GO:0005623 [GO:0000166]; GO:0036094; GO:1901265; GO:0005488; GO:0097159; GO:1901363; GO:0003674 [GO:0000242]; GO:0005813; GO:0044450; GO:0005815;…	cell communication;cell differentiation;cell organization and biogenesis;cell proliferation;cellular component movement;regulation of biological process;response to stimulus;transport	cytoplasm;cytosol;membrane;nucleus	catalytic activity;nucleotide binding;protein binding	rno04010; rno04972; rno04071; rno04662; rno05203; rno04722; rno04360; rno04933; rno04510; rno04015; rno04370; rno04024; rno04666; rno04520; rno05211; rno05231; rno04620; rno04650; rno04810; rno04151; rno05416; rno05212; rno05100; rno05200; rno04014; rno05014; rno04670; rno05205; rno04932; rno05132; rno04145; rno04664; rno04062; rno04380; rno05210; rno04310	0		3.91855e+07	3.97036e+07	3.85657e+07	3.92872e+07		-0.0419529	-0.015211	-0.0267419		0.699927	0.240186	0.453172
High	P48037	79125		Anxa6	annexin A6 [OS=Rattus norvegicus]	0	48	22	1060	22	1	673	75.7	4915.11	22	[GO:0005509]; GO:0046872; GO:0043169; GO:0043167; GO:0005488; GO:0003674 [GO:0005515]; GO:0005488; GO:0003674 [GO:0005525]; GO:0032550; GO:0032561; GO:0035639; GO:0001883; GO:0032549; GO:0019001; GO:0032555; GO:0043168; GO:1901265; GO:0001882; GO:0017076; GO:0032553; GO:0043167; GO:0097159; GO:1901363; GO:0036094; GO:0097367; GO:0000166; GO:0005488; GO:0003674 [GO:0005544]; GO:0005543; GO:0008289…	cell organization and biogenesis;cellular homeostasis;regulation of biological process;response to stimulus;transport	cytoplasm;membrane;mitochondrion;nucleus	metal ion binding;nucleotide binding;protein binding;transporter activity		0		3.9169e+07	3.86742e+07	4.09278e+07	3.79048e+07		0.0817107	-0.0289894	0.1107		0.680589	0.16828	1.03613
High	P13638	24214		Atp1b2	sodium/potassium-transporting ATPase subunit beta-2 [OS=Rattus norvegicus]	0	41	9	457	9	1	290	33.4	1937.94	9	[GO:0001671]; GO:0008047; GO:0060590; GO:0030234; GO:0060589; GO:0098772; GO:0003674 [GO:0005391]; GO:0008556; GO:0015081; GO:0015079; GO:0015662; GO:0019829; GO:0015077; GO:0046873; GO:0042625; GO:0008324; GO:0022890; GO:0022853; GO:0042626; GO:0015075; GO:0022804; GO:0015405; GO:0016820; GO:0043492; GO:0022891; GO:0022857; GO:0015399; GO:0016817; GO:0042623; GO:0022892; GO:0005215; GO:0016787; …	cellular homeostasis;regulation of biological process;transport	cytoplasm;membrane	catalytic activity;enzyme regulator activity;protein binding;transporter activity		0		3.89732e+07	3.80063e+07	3.75392e+07	4.1374e+07		-0.0178412	0.122484	-0.140325		0.0931767	0.380957	0.45359
High	P62762	24877	ENSRNOG00000005345.5	Vsnl1	Visinin-like protein 1 [OS=Rattus norvegicus]	0	58	11	981	10	1	191	22.1	4222.5	11	[GO:0005509]; GO:0046872; GO:0043169; GO:0043167; GO:0005488; GO:0003674 [GO:0005829]; GO:0044444; GO:0005737; GO:0044424; GO:0005622; GO:0044464; GO:0005575; GO:0005623 [GO:0007417]; GO:0007399; GO:0048731; GO:0007275; GO:0048856; GO:0032501; GO:0032502; GO:0008150 [GO:0016020]; GO:0005575 [GO:0019722]; GO:0019932; GO:0035556; GO:0007165; GO:0007154; GO:0009987; GO:0023052; GO:0050794; GO:005171…	regulation of biological process;response to stimulus	cytosol;membrane	metal ion binding		0		3.8735e+07	3.97804e+07	3.72529e+07	3.91717e+07		-0.0947056	-0.0222455	-0.0724601		0.812682	0.0881309	0.397168
High	P10888	29445	ENSRNOG00000017817.5	Cox4i1	Cytochrome c oxidase subunit 4 isoform 1, mitochondrial [OS=Rattus norvegicus]	0.005	14	2	300	2	1	169	19.5	1232.57	2	[GO:0004129]; GO:0009055; GO:0015002; GO:0015078; GO:0016676; GO:0016491; GO:0015077; GO:0016675; GO:0003824; GO:0022890; GO:0003674; GO:0008324; GO:0015075; GO:0022891; GO:0022857; GO:0022892; GO:0005215 [GO:0005634]; GO:0043231; GO:0043227; GO:0043229; GO:0043226; GO:0044424; GO:0005575; GO:0005622; GO:0044464; GO:0005623 [GO:0005739]; GO:0043231; GO:0044444; GO:0043227; GO:0043229; GO:0005737;…	metabolic process;response to stimulus;transport	membrane;mitochondrion;nucleus	catalytic activity;transporter activity	rno05010; rno00190; rno01100; rno05012; rno04932; rno04260; rno05016	0		3.87187e+07	3.86646e+07	4.08231e+07	3.66685e+07		0.0783723	-0.07647	0.154842		0.706475	0.533527	1.37992
High	P54290-1	25399		Cacna2d1	Voltage-dependent calcium channel subunit alpha-2/delta-1 [OS=Rattus norvegicus]	0	37	29	1113	29	1	1091	123.7	4965.24	29	[GO:0005216]; GO:0015075; GO:0022838; GO:0022891; GO:0015267; GO:0022857; GO:0022892; GO:0022803; GO:0005215; GO:0003674 [GO:0005244]; GO:0005216; GO:0022832; GO:0015075; GO:0022838; GO:0022836; GO:0022891; GO:0015267; GO:0022857; GO:0022892; GO:0022803; GO:0005215; GO:0003674 [GO:0005245]; GO:0005262; GO:0022843; GO:0005261; GO:0015085; GO:0005244; GO:0005216; GO:0008324; GO:0046873; GO:0072509;…	cellular homeostasis;regulation of biological process;transport	endoplasmic reticulum;membrane	metal ion binding;protein binding;transporter activity		0		3.85168e+07	3.77617e+07	4.11645e+07	3.66241e+07		0.124478	-0.0441302	0.168609		1.28869	0.204998	1.10695
High	Q561S0	678759; 316632	ENSRNOG00000016470.6	Ndufa10; Ndufa10l1	NADH dehydrogenase [ubiquinone] 1 alpha subcomplex subunit 10, mitochondrial [OS=Rattus norvegicus]	0	57	13	1388	13	1	355	40.5	6967.94	13	[GO:0003674] [GO:0005575] [GO:0005739]; GO:0043231; GO:0044444; GO:0043227; GO:0043229; GO:0005737; GO:0044424; GO:0043226; GO:0005622; GO:0044464; GO:0005575; GO:0005623 [GO:0005747]; GO:0005746; GO:0045271; GO:0098800; GO:1990204; GO:0005743; GO:0044455; GO:0070469; GO:0030964; GO:0098803; GO:0098796; GO:0098798; GO:0044464; GO:1902494; GO:0019866; GO:0031966; GO:0044425; GO:0044429; GO:0043234…	cell organization and biogenesis;metabolic process;response to stimulus;transport	mitochondrion;organelle lumen	catalytic activity	rno05010; rno00190; rno01100; rno05012; rno04932; rno05016	0		3.8458e+07	3.8142e+07	4.24365e+07	3.47955e+07		0.153926	-0.132476	0.286402		1.34961	0.746461	2.34813
High	P17764	25014	ENSRNOG00000007862.6	Acat1	Acetyl-CoA acetyltransferase, mitochondrial [OS=Rattus norvegicus]	0	46	13	1063	13	1	424	44.7	5072.7	13	[GO:0001889]; GO:0048732; GO:0061008; GO:0048513; GO:0048731; GO:0048856; GO:0007275; GO:0032502; GO:0032501; GO:0008150 [GO:0003824]; GO:0003674 [GO:0003985]; GO:0003988; GO:0016453; GO:0016408; GO:0016407; GO:0016747; GO:0016746; GO:0016740; GO:0003824; GO:0003674 [GO:0005739]; GO:0043231; GO:0044444; GO:0043227; GO:0043229; GO:0005737; GO:0044424; GO:0043226; GO:0005622; GO:0044464; GO:0005575…	cell organization and biogenesis;metabolic process;response to stimulus	membrane;mitochondrion;organelle lumen	catalytic activity;metal ion binding;protein binding	rno00310; rno01212; rno00071; rno00072; rno00650; rno00380; rno01100; rno00280; rno00900; rno00620; rno00630; rno00640; rno01200	0		3.8401e+07	3.89725e+07	3.8362e+07	3.78686e+07		-0.0227818	-0.0414551	0.0186733		0.1011	0.187251	0.0821158
High	Q5XIH7	114766	ENSRNOG00000012999.7	Phb2	Prohibitin-2 [OS=Rattus norvegicus]	0	49	11	1166	11	1	299	33.3	5408.95	11	[GO:0000060]; GO:0006606; GO:0006886; GO:0017038; GO:0034504; GO:0051170; GO:0072594; GO:0015031; GO:0034613; GO:0046907; GO:0033365; GO:0006913; GO:0045184; GO:0015833; GO:0008104; GO:0070727; GO:0006810; GO:0051641; GO:0051649; GO:0051169; GO:0051234; GO:0042886; GO:0071702; GO:0033036; GO:0051179; GO:0071705; GO:0008150 [GO:0003674] [GO:0005634]; GO:0043231; GO:0043227; GO:0043229; GO:0043226;…	cell organization and biogenesis;metabolic process;regulation of biological process;response to stimulus;transport	cell surface;cytoplasm;membrane;mitochondrion;nucleus	protein binding		0		3.83588e+07	3.78984e+07	4.1712e+07	3.54659e+07		0.138323	-0.0957058	0.234029		1.17051	0.472695	1.75398
High	P84092	116563	ENSRNOG00000001709.7	Ap2m1	AP-2 complex subunit mu [OS=Rattus norvegicus]	0	44	15	1072	15	1	435	49.6	4671.78	15	[GO:0005048]; GO:0042277; GO:0033218; GO:0005488; GO:0003674 [GO:0005515]; GO:0005488; GO:0003674 [GO:0005739]; GO:0043231; GO:0044444; GO:0043227; GO:0043229; GO:0005737; GO:0044424; GO:0043226; GO:0005622; GO:0044464; GO:0005575; GO:0005623 [GO:0005886]; GO:0016020; GO:0044464; GO:0071944; GO:0005575; GO:0005623 [GO:0005905]; GO:0012505; GO:0044464; GO:0098589; GO:0005575; GO:0005623; GO:001602…	cell organization and biogenesis;metabolic process;regulation of biological process;response to stimulus;transport	membrane;mitochondrion	protein binding	rno04961; rno04721; rno04144; rno05016	0		3.81181e+07	3.74662e+07	3.71137e+07	3.97745e+07		-0.0136386	0.0862535	-0.0998921		0.0831559	0.456159	0.539676
High	Q63560	29457		Map6	Microtubule-associated protein 6 [OS=Rattus norvegicus]	0	47	24	1891	24	1	952	100.4	9372.62	24	[GO:0000226]; GO:0007010; GO:0007017; GO:0006996; GO:0009987; GO:0016043; GO:0008150; GO:0071840 [GO:0005515]; GO:0005488; GO:0003674 [GO:0005516]; GO:0005515; GO:0005488; GO:0003674 [GO:0005737]; GO:0044424; GO:0005622; GO:0044464; GO:0005575; GO:0005623 [GO:0005794]; GO:0012505; GO:0043231; GO:0044444; GO:0044464; GO:0043227; GO:0043229; GO:0005737; GO:0044424; GO:0005575; GO:0005623; GO:004322…	cell organization and biogenesis;cellular component movement;regulation of biological process;transport	cytoplasm;cytoskeleton;Golgi	protein binding		0		3.76721e+07	3.73047e+07	3.65439e+07	3.91678e+07		-0.0297276	0.0703088	-0.100036		0.298714	0.443877	0.720964
High	O08838	60668		Amph	amphiphysin [OS=Rattus norvegicus]	0	45	16	1713	15	1	683	74.8	8063.25	16	[GO:0005515]; GO:0005488; GO:0003674 [GO:0005543]; GO:0008289; GO:0043168; GO:0005488; GO:0043167; GO:0003674 [GO:0005622]; GO:0044464; GO:0005575; GO:0005623 [GO:0005623]; GO:0005575 [GO:0005737]; GO:0044424; GO:0005622; GO:0044464; GO:0005575; GO:0005623 [GO:0005856]; GO:0043232; GO:0043228; GO:0043229; GO:0043226; GO:0044424; GO:0005575; GO:0005622; GO:0044464; GO:0005623 [GO:0007612]; GO:0007…	regulation of biological process;response to stimulus;transport	cytoplasm;cytoskeleton;membrane	protein binding	rno04666; rno04144	0		3.76136e+07	3.87171e+07	3.80702e+07	3.60535e+07		-0.0243101	-0.102831	0.0785205		0.169339	0.832585	0.816577
High	Q01986	170851		Map2k1	Dual specificity mitogen-activated protein kinase kinase 1 [OS=Rattus norvegicus]	0	58	15	828	12	1	393	43.4	4005.73	15	[GO:0000165]; GO:0023014; GO:0035556; GO:0006468; GO:0007165; GO:0006464; GO:0016310; GO:0007154; GO:0009987; GO:0023052; GO:0050794; GO:0051716; GO:0036211; GO:0044267; GO:0006796; GO:0008150; GO:0050789; GO:0050896; GO:0019538; GO:0043412; GO:0044260; GO:0006793; GO:0065007; GO:0043170; GO:0044238; GO:1901564; GO:0044237; GO:0071704; GO:0008152; GO:0006807 [GO:0000166]; GO:0036094; GO:1901265; …	cell differentiation;cell organization and biogenesis;cell proliferation;cellular component movement;metabolic process;regulation of biological process;response to stimulus;transport	cytoplasm;cytoskeleton;cytosol;endoplasmic reticulum;endosome;Golgi;membrane;mitochondrion;nucleus	catalytic activity;enzyme regulator activity;nucleotide binding;protein binding;signal transducer activity	rno04921; rno04912; rno05213; rno04010; rno05034; rno04012; rno05020; rno04071; rno04662; rno04210; rno04722; rno04540; rno05214; rno05161; rno04510; rno04015; rno04370; rno05215; rno04024; rno05164; rno04917; rno04666; rno04660; rno05230; rno05211; rno05231; rno04620; rno04650; rno05223; rno04320; rno04810; rno05221; rno04915; rno04550; rno04151; rno05219; rno04914; rno01522; rno01521; rno04725;…	3		3.75224e+07	3.754e+07	3.83257e+07	3.67015e+07		0.0298807	-0.0325926	0.0624733		0.188355	0.205914	0.390695
High	Q9WTT6	83585		Gda	guanine deaminase [OS=Rattus norvegicus]	0	64	19	1285	19	1	454	51	6264.69	19	[GO:0006147]; GO:0006145; GO:0046098; GO:0006144; GO:0046113; GO:0072523; GO:0009112; GO:0072521; GO:0046700; GO:1901361; GO:1901565; GO:0019439; GO:0044270; GO:0055086; GO:1901564; GO:0006725; GO:0034641; GO:0046483; GO:1901360; GO:0044248; GO:1901575; GO:0006139; GO:0044281; GO:0006807; GO:0071704; GO:0044237; GO:0009056; GO:0044238; GO:0008152; GO:0009987; GO:0008150 [GO:0008270]; GO:0046914; …	metabolic process;regulation of biological process		catalytic activity;metal ion binding		0		3.75123e+07	3.69577e+07	3.73044e+07	3.82749e+07		0.013469	0.0505219	-0.0370529		0.092686	0.231378	0.168092
High	P48721	291671		Hspa9	Stress-70 protein, mitochondrial [OS=Rattus norvegicus]	0	50	22	834	22	1	679	73.8	3424.19	22	[GO:0000166]; GO:0036094; GO:1901265; GO:0005488; GO:0097159; GO:1901363; GO:0003674 [GO:0000902]; GO:0032989; GO:0009653; GO:0016043; GO:0048869; GO:0032502; GO:0048856; GO:0009987; GO:0071840; GO:0008150 [GO:0003723]; GO:0003676; GO:0097159; GO:1901363; GO:0005488; GO:0003674 [GO:0005515]; GO:0005488; GO:0003674 [GO:0005524]; GO:0032559; GO:0035639; GO:0030554; GO:0032555; GO:0043168; GO:190126…	cell differentiation;cell organization and biogenesis;metabolic process;regulation of biological process;response to stimulus;transport	cytoplasm;mitochondrion;nucleus;organelle lumen	nucleotide binding;protein binding;RNA binding		0		3.72344e+07	3.69126e+07	3.74451e+07	3.73455e+07		0.0206625	0.0168184	0.00384407		0.163303	0.105633	0.0235895
High	O08839	117028		Bin1	Myc box-dependent-interacting protein 1 [OS=Rattus norvegicus]	0	42	18	1351	17	1	588	64.5	6374.4	18	[GO:0005515]; GO:0005488; GO:0003674 [GO:0005634]; GO:0043231; GO:0043227; GO:0043229; GO:0043226; GO:0044424; GO:0005575; GO:0005622; GO:0044464; GO:0005623 [GO:0005635]; GO:0012505; GO:0031967; GO:0044428; GO:0044464; GO:0031975; GO:0043227; GO:0044446; GO:0005634; GO:0005575; GO:0005623; GO:0043226; GO:0043229; GO:0044422; GO:0044424; GO:0043231; GO:0005622 [GO:0005737]; GO:0044424; GO:0005622…	cell differentiation;cell organization and biogenesis;development;regulation of biological process;transport	cytoplasm;cytosol;membrane;nucleus	protein binding	rno04666; rno04144	1		3.72183e+07	3.77479e+07	3.67998e+07	3.71073e+07		-0.0366987	-0.0246907	-0.012008		0.848506	0.332355	0.15857
High	P08009	81869	ENSRNOG00000018937.4	Gstm7	Glutathione S-transferase Yb-3 [OS=Rattus norvegicus]	0	52	11	964	8	1	218	25.7	4357.29	11	[GO:0004364]; GO:0016765; GO:0016740; GO:0003824; GO:0003674 [GO:0004602]; GO:0004601; GO:0016209; GO:0016684; GO:0003674; GO:0016491; GO:0003824 [GO:0005102]; GO:0005515; GO:0005488; GO:0003674 [GO:0005515]; GO:0005488; GO:0003674 [GO:0005737]; GO:0044424; GO:0005622; GO:0044464; GO:0005575; GO:0005623 [GO:0006749]; GO:0006518; GO:0006575; GO:0006790; GO:0043603; GO:1901564; GO:0044237; GO:00346…	metabolic process;regulation of biological process;response to stimulus	cytoplasm;endoplasmic reticulum	antioxidant activity;catalytic activity;protein binding	rno01524; rno05204; rno00980; rno00480; rno00982	3		3.63259e+07	3.52527e+07	3.51731e+07	3.85519e+07		-0.00326098	0.129066	-0.132327		0.0146012	0.753726	0.721639
High	Q1WIM2	360687		Cadm2	cell adhesion molecule 2 [OS=Rattus norvegicus]	0	47	10	871	10	1	435	47.5	4187.55	10	[GO:0004872]; GO:0060089; GO:0003674 [GO:0005102]; GO:0005515; GO:0005488; GO:0003674 [GO:0005515]; GO:0005488; GO:0003674 [GO:0005737]; GO:0044424; GO:0005622; GO:0044464; GO:0005575; GO:0005623 [GO:0005886]; GO:0016020; GO:0044464; GO:0071944; GO:0005575; GO:0005623 [GO:0005887]; GO:0016021; GO:0031226; GO:0031224; GO:0044459; GO:0044425; GO:0005886; GO:0044464; GO:0005575; GO:0016020; GO:00719…		cytoplasm;membrane	protein binding;receptor activity		0		3.59352e+07	3.60655e+07	3.63993e+07	3.53408e+07		0.0132925	-0.029284	0.0425765		0.193273	0.227877	0.358587
High	P11506	24215		Atp2b2	Plasma membrane calcium-transporting ATPase 2 [OS=Rattus norvegicus]	0	42	34	2387	1	1	1243	136.7	11787	34	[GO:0000166]; GO:0036094; GO:1901265; GO:0005488; GO:0097159; GO:1901363; GO:0003674 [GO:0000902]; GO:0032989; GO:0009653; GO:0016043; GO:0048869; GO:0032502; GO:0048856; GO:0009987; GO:0071840; GO:0008150 [GO:0003407]; GO:0048856; GO:0060041; GO:0032502; GO:0043010; GO:0008150; GO:0001654; GO:0007423; GO:0048513; GO:0048731; GO:0007275; GO:0032501 [GO:0005388]; GO:0015085; GO:0015662; GO:0019829…	cell differentiation;cell organization and biogenesis;cellular homeostasis;metabolic process;regulation of biological process;response to stimulus;transport	cytoplasm;endoplasmic reticulum;membrane	catalytic activity;metal ion binding;nucleotide binding;protein binding;transporter activity	rno04972; rno04020; rno04261; rno04024; rno04970; rno04022	20		3.58495e+07	3.54653e+07	3.56224e+07	3.64609e+07		0.00637614	0.0399398	-0.0335636		0.0389194	0.271573	0.295641
High	P18418	64202	ENSRNOG00000003029.6	Calr	Calreticulin [OS=Rattus norvegicus]	0	56	14	1242	14	1	416	48	5537.35	14	[GO:0000122]; GO:0006357; GO:0006366; GO:0045892; GO:0006355; GO:0006351; GO:0010629; GO:1903507; GO:2000113; GO:0010468; GO:1903506; GO:2000112; GO:0010467; GO:0034645; GO:0097659; GO:0010605; GO:1902679; GO:0010558; GO:0031327; GO:0060255; GO:2001141; GO:0010556; GO:0031326; GO:0043170; GO:0009059; GO:0044249; GO:0044260; GO:0032774; GO:0009892; GO:0051253; GO:0009890; GO:0031324; GO:0019222; G…	cell differentiation;cell organization and biogenesis;metabolic process;regulation of biological process;response to stimulus;transport	cell surface;cytoplasm;cytosol;endoplasmic reticulum;Golgi;membrane;nucleus;organelle lumen	metal ion binding;protein binding;RNA binding	rno04612; rno05142; rno04141; rno04145; rno05166	0		3.58412e+07	3.51685e+07	3.29315e+07	3.94237e+07		-0.094819	0.164778	-0.259597		0.56642	0.791879	1.70267
High	P37377-1	29219	ENSRNOG00000008656.8	Snca	Alpha-synuclein [OS=Rattus norvegicus]	0	64	5	673	5	1	140	14.5	3729	5	[GO:0000287]; GO:0046872; GO:0043169; GO:0043167; GO:0005488; GO:0003674 [GO:0001774]; GO:0042116; GO:0061900; GO:0002274; GO:0001775; GO:0045321; GO:0009987; GO:0002376; GO:0008150 [GO:0001921]; GO:0001881; GO:0001919; GO:0010604; GO:0023056; GO:0031325; GO:0023051; GO:0043112; GO:0031323; GO:0060255; GO:0009893; GO:0043170; GO:0023052; GO:0048518; GO:0044237; GO:0048522; GO:0050789; GO:0044260;…	cell communication;cell death;cell organization and biogenesis;metabolic process;regulation of biological process;response to stimulus;transport	cytoplasm;cytoskeleton;cytosol;endoplasmic reticulum;extracellular;Golgi;membrane;mitochondrion;nucleus;ribosome	catalytic activity;enzyme regulator activity;metal ion binding;protein binding	rno05010; rno05012	0		3.57349e+07	3.7235e+07	3.37549e+07	3.62148e+07		-0.141562	-0.0400772	-0.101485		0.880472	0.150929	0.48605
High	P10818	25282	ENSRNOG00000001170.4	Cox6a1	Cytochrome c oxidase subunit 6A1, mitochondrial [OS=Rattus norvegicus]	0	64	6	746	6	1	111	12.3	3349.72	6	[GO:0004129]; GO:0009055; GO:0015002; GO:0015078; GO:0016676; GO:0016491; GO:0015077; GO:0016675; GO:0003824; GO:0022890; GO:0003674; GO:0008324; GO:0015075; GO:0022891; GO:0022857; GO:0022892; GO:0005215 [GO:0005739]; GO:0043231; GO:0044444; GO:0043227; GO:0043229; GO:0005737; GO:0044424; GO:0043226; GO:0005622; GO:0044464; GO:0005575; GO:0005623 [GO:0005743]; GO:0019866; GO:0031966; GO:0031090;…	metabolic process;regulation of biological process;transport	membrane;mitochondrion	catalytic activity;enzyme regulator activity;transporter activity	rno05010; rno00190; rno01100; rno05012; rno04932; rno04260; rno05016	0		3.54942e+07	3.5107e+07	3.85493e+07	3.28263e+07		0.134948	-0.0969062	0.231854		0.892186	0.387467	1.45754
Medium	Q9JJW3	171069; 103693430	ENSRNOG00000042869.2; ENSRNOG00000020296.5	Usmg5; LOC100360002; LOC103693430	Up-regulated during skeletal muscle growth protein 5 [OS=Rattus norvegicus]	0.027	57	2	53	2	1	58	6.4	196.33	2	[GO:0005739]; GO:0043231; GO:0044444; GO:0043227; GO:0043229; GO:0005737; GO:0044424; GO:0043226; GO:0005622; GO:0044464; GO:0005575; GO:0005623 [GO:0005743]; GO:0019866; GO:0031966; GO:0031090; GO:0031967; GO:0044424; GO:0005740; GO:0044429; GO:0016020; GO:0043227; GO:0044422; GO:0031975; GO:0044446; GO:0005622; GO:0044464; GO:0005739; GO:0044444; GO:0005575; GO:0043226; GO:0043229; GO:0005623; …		membrane;mitochondrion			0		3.52679e+07	3.55239e+07	3.73454e+07	3.29345e+07		0.0721415	-0.109189	0.181331		0.561488	0.621494	1.41855
High	Q6P502	295230	ENSRNOG00000019090.6	Cct3	T-complex protein 1 subunit gamma [OS=Rattus norvegicus]	0	59	23	702	23	1	545	60.6	2968.33	23	[GO:0000166]; GO:0036094; GO:1901265; GO:0005488; GO:0097159; GO:1901363; GO:0003674 [GO:0002199]; GO:0043234; GO:0032991; GO:0005575 [GO:0003723]; GO:0003676; GO:0097159; GO:1901363; GO:0005488; GO:0003674 [GO:0005524]; GO:0032559; GO:0035639; GO:0030554; GO:0032555; GO:0043168; GO:1901265; GO:0017076; GO:0032553; GO:0043167; GO:0097159; GO:1901363; GO:0000166; GO:0097367; GO:0005488; GO:0036094…	cell organization and biogenesis;metabolic process;regulation of biological process;transport	cytoplasm;cytosol;membrane	nucleotide binding;protein binding;RNA binding		0		3.48875e+07	3.53518e+07	3.53146e+07	3.3996e+07		-0.00151885	-0.0564188	0.0548999		0.0117785	0.62552	0.649987
High	Q64548-1	116644		Rtn1	Reticulon-1 [OS=Rattus norvegicus]	0	41	15	763	13	1	777	83	3432.78	15	[GO:0005783]; GO:0012505; GO:0043231; GO:0044444; GO:0044464; GO:0043227; GO:0043229; GO:0005737; GO:0044424; GO:0005575; GO:0005623; GO:0043226; GO:0005622 [GO:0005789]; GO:0016020; GO:0042175; GO:0044425; GO:0044432; GO:0098827; GO:0005575; GO:0012505; GO:0044464; GO:0005783; GO:0044444; GO:0044446; GO:0031984; GO:0005623; GO:0043231; GO:0005737; GO:0044424; GO:0043229; GO:0044422; GO:0043227; …	cell differentiation	endoplasmic reticulum;membrane			2		3.48539e+07	3.40341e+07	3.66633e+07	3.38643e+07		0.107357	-0.00721593	0.114573		0.841332	0.0330072	1.01125
High	P19491-3	29627		Gria2	Isoform 3 of Glutamate receptor 2 [OS=Rattus norvegicus]	0	40	29	1644	3	1	901	100.3	7790.9	29	[GO:0000149]; GO:0005515; GO:0005488; GO:0003674 [GO:0001540]; GO:0042277; GO:0033218; GO:0005488; GO:0003674 [GO:0001919]; GO:0001881; GO:0023051; GO:0031323; GO:0060255; GO:0043112; GO:0023052; GO:0050789; GO:0019222; GO:0044237; GO:0050794; GO:0043170; GO:0044260; GO:0008150; GO:0065007; GO:0008152; GO:0009987; GO:0071704 [GO:0004872]; GO:0060089; GO:0003674 [GO:0004970]; GO:0008066; GO:002282…	cell communication;cell organization and biogenesis;metabolic process;regulation of biological process;response to stimulus;transport	cell surface;endoplasmic reticulum;membrane	protein binding;receptor activity;signal transducer activity;transporter activity		25		3.47062e+07	3.39396e+07	3.74914e+07	3.26876e+07		0.143588	-0.0542265	0.197814		1.68182	0.226612	1.59495
High	Q5XIN6	305457	ENSRNOG00000016427.6	Letm1	mitochondrial proton/calcium exchanger protein [OS=Rattus norvegicus]	0	42	23	1278	23	1	739	83	5764.21	23	[GO:0005623]; GO:0005575 [GO:0005739]; GO:0043231; GO:0044444; GO:0043227; GO:0043229; GO:0005737; GO:0044424; GO:0043226; GO:0005622; GO:0044464; GO:0005575; GO:0005623 [GO:0005743]; GO:0019866; GO:0031966; GO:0031090; GO:0031967; GO:0044424; GO:0005740; GO:0044429; GO:0016020; GO:0043227; GO:0044422; GO:0031975; GO:0044446; GO:0005622; GO:0044464; GO:0005739; GO:0044444; GO:0005575; GO:0043226;…	cell organization and biogenesis;cellular homeostasis;transport	membrane;mitochondrion	metal ion binding;transporter activity		0		3.45793e+07	3.47251e+07	3.71225e+07	3.18902e+07		0.0963186	-0.122863	0.219181		0.708828	0.677262	1.49761
High	Q2TA68-2	171116		Opa1	Isoform 2 of Dynamin-like 120 kDa protein, mitochondrial [OS=Rattus norvegicus]	0	41	28	1272	28	1	1014	117.3	5500.45	28	[GO:0000002]; GO:0007005; GO:0006996; GO:0016043; GO:0009987; GO:0071840; GO:0008150 [GO:0000266]; GO:0007005; GO:0048285; GO:0006996; GO:0016043; GO:0009987; GO:0071840; GO:0008150 [GO:0001843]; GO:0014020; GO:0060606; GO:0001838; GO:0001841; GO:0035148; GO:0016331; GO:0072175; GO:0021915; GO:0035239; GO:0048646; GO:0002009; GO:0048598; GO:0060562; GO:0007399; GO:0035295; GO:0043009; GO:0060429;…	cell death;cell organization and biogenesis;cellular homeostasis;metabolic process;regulation of biological process;response to stimulus;transport	cytosol;membrane;mitochondrion	catalytic activity;nucleotide binding;protein binding		0		3.43885e+07	3.35945e+07	3.71666e+07	3.24045e+07		0.145782	-0.0520296	0.197812		1.78849	0.254909	1.63473
High	P35704	29338		Prdx2	Peroxiredoxin-2 [OS=Rattus norvegicus]	0	63	7	503	7	1	198	21.8	2146.07	7	[GO:0000187]; GO:0032147; GO:0043406; GO:0045860; GO:0043405; GO:0043410; GO:0071902; GO:0001934; GO:0033674; GO:0045859; GO:0043408; GO:0071900; GO:0000165; GO:1902533; GO:0001932; GO:0006468; GO:0031401; GO:0042327; GO:0043549; GO:0051347; GO:1902531; GO:0023014; GO:0035556; GO:0009967; GO:0031399; GO:0042325; GO:0006464; GO:0016310; GO:0032270; GO:0045937; GO:0051338; GO:0043085; GO:0009966; G…	cell proliferation;cellular homeostasis;metabolic process;regulation of biological process;response to stimulus	cytoplasm;cytosol;mitochondrion	antioxidant activity;catalytic activity		0		3.43283e+07	3.29589e+07	3.26415e+07	3.73846e+07		-0.013962	0.181777	-0.19574		0.0660573	1.04078	1.28199
High	O70511	361833		Ank3	Ankyrin-3 [OS=Rattus norvegicus]	0	23	38	1145	3	1	2622	284.3	4650.07	38	[GO:0000281]; GO:0061640; GO:1903047; GO:0000910; GO:0000278; GO:0022402; GO:0051301; GO:0007049; GO:0009987; GO:0008150 [GO:0005200]; GO:0005198; GO:0003674 [GO:0005515]; GO:0005488; GO:0003674 [GO:0005737]; GO:0044424; GO:0005622; GO:0044464; GO:0005575; GO:0005623 [GO:0005764]; GO:0000323; GO:0005773; GO:0043231; GO:0044444; GO:0043227; GO:0043229; GO:0005737; GO:0044424; GO:0043226; GO:000562…	cell organization and biogenesis;cellular component movement;regulation of biological process;response to stimulus;transport	cell surface;cytoplasm;cytoskeleton;endoplasmic reticulum;membrane;vacuole	protein binding;structural molecule activity	rno05205	33		3.43063e+07	3.38471e+07	3.55493e+07	3.35225e+07		0.0707894	-0.0139054	0.0846948		1.08186	0.117898	1.22238
High	Q63092	79011		Camkv	caM kinase-like vesicle-associated protein [OS=Rattus norvegicus]	0	61	18	1456	18	1	504	54.1	6733.02	18	[GO:0004672]; GO:0016301; GO:0016773; GO:0140096; GO:0016772; GO:0003824; GO:0016740; GO:0003674 [GO:0004683]; GO:0004674; GO:0004672; GO:0016301; GO:0016773; GO:0140096; GO:0016772; GO:0003824; GO:0016740; GO:0003674 [GO:0005516]; GO:0005515; GO:0005488; GO:0003674 [GO:0005524]; GO:0032559; GO:0035639; GO:0030554; GO:0032555; GO:0043168; GO:1901265; GO:0017076; GO:0032553; GO:0043167; GO:0097159…	metabolic process;regulation of biological process;response to stimulus	membrane	catalytic activity;nucleotide binding;protein binding		0		3.39661e+07	3.31257e+07	3.51317e+07	3.3641e+07		0.0848241	0.0222711	0.062553		0.606571	0.0836256	0.318879
High	Q08163	64185	ENSRNOG00000013492.4	Cap1	adenylyl cyclase-associated protein 1 [OS=Rattus norvegicus]	0	63	16	2017	16	1	474	51.6	10065.3	16	[GO:0000902]; GO:0032989; GO:0009653; GO:0016043; GO:0048869; GO:0032502; GO:0048856; GO:0009987; GO:0071840; GO:0008150 [GO:0001667]; GO:0016477; GO:0048870; GO:0006928; GO:0040011; GO:0051674; GO:0009987; GO:0008150; GO:0051179 [GO:0003674] [GO:0003779]; GO:0008092; GO:0005515; GO:0005488; GO:0003674 [GO:0005575] [GO:0005615]; GO:0044421; GO:0005575; GO:0005576 [GO:0005737]; GO:0044424; GO:0005…	cell organization and biogenesis;cellular component movement;regulation of biological process;response to stimulus;transport	cytoplasm;cytoskeleton;membrane	protein binding		0		3.38477e+07	3.30638e+07	3.53149e+07	3.31644e+07		0.0950249	0.00438009	0.0906448		0.558416	0.0179765	0.497592
High	P61589	117273	ENSRNOG00000050519.2	Rhoa	Transforming protein RhoA [OS=Rattus norvegicus]	0	62	9	1045	7	1	193	21.8	4996.65	9	[GO:0000166]; GO:0036094; GO:1901265; GO:0005488; GO:0097159; GO:1901363; GO:0003674 [GO:0000902]; GO:0032989; GO:0009653; GO:0016043; GO:0048869; GO:0032502; GO:0048856; GO:0009987; GO:0071840; GO:0008150 [GO:0001666]; GO:0006950; GO:0036293; GO:0050896; GO:0070482; GO:0008150; GO:0009628 [GO:0001998]; GO:0002034; GO:0003084; GO:0042310; GO:0003072; GO:0003081; GO:0097746; GO:0003073; GO:0045777…	cell differentiation;cell division;cell organization and biogenesis;cellular component movement;metabolic process;regulation of biological process;response to stimulus	cytoplasm;cytoskeleton;cytosol;endosome;membrane;mitochondrion;nucleus	catalytic activity;nucleotide binding;protein binding	rno04921; rno04530; rno04972; rno04071; rno05203; rno04722; rno04360; rno04510; rno04015; rno05133; rno04024; rno05152; rno04660; rno04520; rno04810; rno04350; rno05100; rno05200; rno04611; rno04014; rno05206; rno04670; rno05205; rno04150; rno04270; rno04144; rno04062; rno05210; rno04022; rno04310; rno04072; rno04621	2		3.35945e+07	3.39482e+07	3.29971e+07	3.38382e+07		-0.0409943	-0.00467854	-0.0363158		0.51572	0.0373737	0.479793
High	Q9R063-1	113898		Prdx5	Peroxiredoxin-5, mitochondrial [OS=Rattus norvegicus]	0	54	9	836	9	1	213	22.2	3737.34	9	[GO:0001016]; GO:0044212; GO:0000975; GO:0001067; GO:0003677; GO:0003676; GO:0097159; GO:1901363; GO:0005488; GO:0003674 [GO:0004601]; GO:0016209; GO:0016684; GO:0003674; GO:0016491; GO:0003824 [GO:0005102]; GO:0005515; GO:0005488; GO:0003674 [GO:0005615]; GO:0044421; GO:0005575; GO:0005576 [GO:0005634]; GO:0043231; GO:0043227; GO:0043229; GO:0043226; GO:0044424; GO:0005575; GO:0005622; GO:004446…	cell death;cellular homeostasis;metabolic process;regulation of biological process;response to stimulus	cytoplasm;cytosol;mitochondrion;nucleus;organelle lumen	antioxidant activity;catalytic activity;DNA binding;enzyme regulator activity;protein binding	rno04146	0		3.32768e+07	3.24541e+07	3.28762e+07	3.45002e+07		0.0186427	0.0882062	-0.0695634		0.158259	0.990055	0.644568
Low	P49805	29481	ENSRNOG00000003800.6	Rgs9	regulator of G-protein signaling 9 [OS=Rattus norvegicus]	0.527	3	1	1	1	1	677	77.1	3.4	1	[GO:0001750]; GO:0044441; GO:0097458; GO:0097733; GO:0005929; GO:0044422; GO:0120038; GO:0044464; GO:0043005; GO:0097731; GO:0043226; GO:0120025; GO:0005575; GO:0044463; GO:0005623; GO:0097730; GO:0042995 [GO:0001917]; GO:0097458; GO:0044464; GO:0005575; GO:0005623 [GO:0004871]; GO:0003674 [GO:0005096]; GO:0008047; GO:0030695; GO:0030234; GO:0060589; GO:0098772; GO:0003674 [GO:0005634]; GO:004323…	regulation of biological process;response to stimulus	cytoplasm;membrane;nucleus	enzyme regulator activity;protein binding;signal transducer activity	rno05030; rno04744	0		3.32238e+07	3.06132e+07	3.11979e+07	3.78602e+07		0.0272967	0.306528	-0.279231		0.0424545	0.611279	0.800429
High	P07632	24786	ENSRNOG00000002115.6	Sod1	Superoxide dismutase [Cu-Zn] [OS=Rattus norvegicus]	0.005	62	5	296	5	1	154	15.9	1129.84	5	[GO:0000187]; GO:0032147; GO:0043406; GO:0045860; GO:0043405; GO:0043410; GO:0071902; GO:0001934; GO:0033674; GO:0045859; GO:0043408; GO:0071900; GO:0000165; GO:1902533; GO:0001932; GO:0006468; GO:0031401; GO:0042327; GO:0043549; GO:0051347; GO:1902531; GO:0023014; GO:0035556; GO:0009967; GO:0031399; GO:0042325; GO:0006464; GO:0016310; GO:0032270; GO:0045937; GO:0051338; GO:0043085; GO:0009966; G…	cell organization and biogenesis;cellular component movement;cellular homeostasis;metabolic process;regulation of biological process;response to stimulus;transport	cytoplasm;cytosol;extracellular;membrane;mitochondrion;nucleus;vacuole	antioxidant activity;catalytic activity;metal ion binding;protein binding	rno05020; rno04213; rno05014; rno04146; rno05016	0		3.32022e+07	3.21303e+07	3.1019e+07	3.64574e+07		-0.0507802	0.18228	-0.233061		0.380077	1.13701	1.60681
High	P63170	58945	ENSRNOG00000011222.5	Dynll1	Dynein light chain 1, cytoplasmic [OS=Rattus norvegicus]	0	69	4	327	1	1	89	10.4	1893.97	4	[GO:0000776]; GO:0000775; GO:0043232; GO:0043234; GO:0044427; GO:0098687; GO:0043228; GO:0043229; GO:0032991; GO:0005694; GO:0044446; GO:0043226; GO:0044424; GO:0005575; GO:0044422; GO:0005622; GO:0044464; GO:0005623 [GO:0003774]; GO:0017111; GO:0016462; GO:0016818; GO:0016817; GO:0016787; GO:0003824; GO:0003674 [GO:0004857]; GO:0030234; GO:0098772; GO:0003674 [GO:0005515]; GO:0005488; GO:0003674…	cell death;cell organization and biogenesis;cellular component movement;metabolic process;regulation of biological process;transport	chromosome;cytoplasm;cytoskeleton;cytosol;membrane;mitochondrion;nucleus	catalytic activity;enzyme regulator activity;motor activity;protein binding	rno04962	2		3.28693e+07	3.31208e+07	3.35537e+07	3.19335e+07		0.0187351	-0.0526643	0.0713994		0.223436	0.601176	0.843443
High	Q62717	26989		Cadps	Calcium-dependent secretion activator 1 [OS=Rattus norvegicus]	0	41	35	1314	35	1	1289	146.2	6045.24	35	[GO:0005509]; GO:0046872; GO:0043169; GO:0043167; GO:0005488; GO:0003674 [GO:0005515]; GO:0005488; GO:0003674 [GO:0005546]; GO:1902936; GO:1901981; GO:0035091; GO:0005543; GO:0008289; GO:0043168; GO:0005488; GO:0043167; GO:0003674 [GO:0006810]; GO:0051234; GO:0051179; GO:0008150 [GO:0006887]; GO:0016192; GO:0032940; GO:0006810; GO:0009987; GO:0046903; GO:0051234; GO:0008150; GO:0051179 [GO:000828…	cell organization and biogenesis;regulation of biological process;transport	membrane	metal ion binding;protein binding		0		3.27567e+07	3.24582e+07	3.42388e+07	3.15729e+07		0.0770466	-0.039896	0.116943		0.79199	0.278977	1.16077
High	Q9JHY2	65042		Sfxn3	Sideroflexin-3 [OS=Rattus norvegicus]	0	65	13	1097	11	1	321	35.4	5280.83	13	[GO:0003674] [GO:0005371]; GO:0015142; GO:0015291; GO:0046943; GO:0022804; GO:0005342; GO:0008514; GO:0022857; GO:0022891; GO:0008509; GO:0005215; GO:0022892; GO:0015075; GO:0003674 [GO:0005739]; GO:0043231; GO:0044444; GO:0043227; GO:0043229; GO:0005737; GO:0044424; GO:0043226; GO:0005622; GO:0044464; GO:0005575; GO:0005623 [GO:0006810]; GO:0051234; GO:0051179; GO:0008150 [GO:0006811]; GO:000681…	transport	membrane;mitochondrion	transporter activity		2		3.27426e+07	3.24147e+07	3.45569e+07	3.12562e+07		0.0923241	-0.0525046	0.144829		1.14892	0.366876	2.22343
High	Q5RKI0	360950	ENSRNOG00000028498.5	Wdr1	WD repeat-containing protein 1 [OS=Rattus norvegicus]	0	57	18	1036	18	1	606	66.1	5094.36	18	[GO:0002098]; GO:0002097; GO:0006400; GO:0008033; GO:0009451; GO:0006399; GO:0034470; GO:0016070; GO:0043412; GO:0034660; GO:0006396; GO:0044260; GO:0090304; GO:0043170; GO:0010467; GO:0044237; GO:0006139; GO:0071704; GO:0008152; GO:0009987; GO:0006725; GO:0034641; GO:0044238; GO:0046483; GO:1901360; GO:0008150; GO:0006807 [GO:0002102]; GO:0015629; GO:0043232; GO:0043234; GO:0044430; GO:0005856; …	cell differentiation;cell organization and biogenesis;cellular component movement;metabolic process;regulation of biological process	cytoplasm;cytoskeleton;cytosol	protein binding		0		3.25148e+07	3.17635e+07	3.17862e+07	3.39948e+07		0.00103409	0.097945	-0.0969109		0.00589937	0.538326	0.581795
High	P00406	26198	ENSRNOG00000030371.3	COX2	Cytochrome c oxidase subunit 2 [OS=Rattus norvegicus]	0	37	4	644	4	1	227	25.9	3145.71	4	[GO:0003674] [GO:0004129]; GO:0009055; GO:0015002; GO:0015078; GO:0016676; GO:0016491; GO:0015077; GO:0016675; GO:0003824; GO:0022890; GO:0003674; GO:0008324; GO:0015075; GO:0022891; GO:0022857; GO:0022892; GO:0005215 [GO:0005507]; GO:0046914; GO:0046872; GO:0043169; GO:0043167; GO:0005488; GO:0003674 [GO:0005575] [GO:0005739]; GO:0043231; GO:0044444; GO:0043227; GO:0043229; GO:0005737; GO:004442…	metabolic process;response to stimulus;transport	membrane;mitochondrion	catalytic activity;metal ion binding;transporter activity	rno05010; rno00190; rno01100; rno05012; rno04932; rno04260; rno05016	0		3.24866e+07	3.43083e+07	3.3234e+07	2.99176e+07		-0.0458985	-0.197563	0.151664		0.161796	1.0352	0.554015
High	O35244	94167	ENSRNOG00000002896.7	Prdx6	Peroxiredoxin-6 [OS=Rattus norvegicus]	0	58	14	815	14	1	224	24.8	3660.28	14	[GO:0000302]; GO:0006979; GO:1901700; GO:0006950; GO:0042221; GO:0050896; GO:0008150 [GO:0003824]; GO:0003674 [GO:0004601]; GO:0016209; GO:0016684; GO:0003674; GO:0016491; GO:0003824 [GO:0004602]; GO:0004601; GO:0016209; GO:0016684; GO:0003674; GO:0016491; GO:0003824 [GO:0004623]; GO:0004620; GO:0052689; GO:0016298; GO:0016788; GO:0016787; GO:0003824; GO:0003674 [GO:0005515]; GO:0005488; GO:00036…	cell organization and biogenesis;cellular homeostasis;metabolic process;regulation of biological process;response to stimulus	cytoplasm;cytosol;membrane;mitochondrion;nucleus;vacuole	antioxidant activity;catalytic activity;protein binding	rno01100	0		3.23526e+07	3.21738e+07	3.09444e+07	3.39397e+07		-0.0562077	0.0770844	-0.133292		0.657346	0.642145	1.31876
High	P47860	60416		Pfkp	ATP-dependent 6-phosphofructokinase, platelet type [OS=Rattus norvegicus]	0	53	26	1469	24	1	788	85.7	7076.57	26	[GO:0000166]; GO:0036094; GO:1901265; GO:0005488; GO:0097159; GO:1901363; GO:0003674 [GO:0003824]; GO:0003674 [GO:0003872]; GO:0008443; GO:0016773; GO:0019200; GO:0016772; GO:0016301; GO:0016740; GO:0003824; GO:0003674 [GO:0005524]; GO:0032559; GO:0035639; GO:0030554; GO:0032555; GO:0043168; GO:1901265; GO:0017076; GO:0032553; GO:0043167; GO:0097159; GO:1901363; GO:0000166; GO:0097367; GO:0005488…	cell organization and biogenesis;metabolic process	cytoplasm;cytosol;membrane;nucleus	catalytic activity;metal ion binding;nucleotide binding;protein binding	rno00010; rno00052; rno05230; rno00030; rno01230; rno01100; rno03018; rno04152; rno00051; rno04919; rno01200	2		3.20329e+07	3.06914e+07	2.98307e+07	3.55767e+07		-0.0410347	0.213099	-0.254133		0.191256	1.15716	1.47736
High	Q64568-1	29599		Atp2b3	Plasma membrane calcium-transporting ATPase 3 [OS=Rattus norvegicus]	0	37	35	2566	22	1	1258	138.5	11630	35	[GO:0000166]; GO:0036094; GO:1901265; GO:0005488; GO:0097159; GO:1901363; GO:0003674 [GO:0003407]; GO:0048856; GO:0060041; GO:0032502; GO:0043010; GO:0008150; GO:0001654; GO:0007423; GO:0048513; GO:0048731; GO:0007275; GO:0032501 [GO:0005388]; GO:0015085; GO:0015662; GO:0019829; GO:0046873; GO:0072509; GO:0042625; GO:0008324; GO:0022890; GO:0022853; GO:0042626; GO:0015075; GO:0022804; GO:0015405;…	cellular homeostasis;transport	Golgi;membrane	catalytic activity;metal ion binding;nucleotide binding;protein binding;transporter activity	rno04972; rno04020; rno04261; rno04024; rno04970; rno04022	1		3.20161e+07	3.18007e+07	3.26951e+07	3.15526e+07		0.0400166	-0.0112967	0.0513133		0.398688	0.0681824	0.428443
High	Q5RKI1	303831	ENSRNOG00000001815.6	Eif4a2	eukaryotic initiation factor 4A-II [OS=Rattus norvegicus]	0	57	16	865	15	1	407	46.4	4049.09	16	[GO:0000166]; GO:0036094; GO:1901265; GO:0005488; GO:0097159; GO:1901363; GO:0003674 [GO:0003674] [GO:0003676]; GO:0097159; GO:1901363; GO:0005488; GO:0003674 [GO:0003677]; GO:0003676; GO:0097159; GO:1901363; GO:0005488; GO:0003674 [GO:0003723]; GO:0003676; GO:0097159; GO:1901363; GO:0005488; GO:0003674 [GO:0003743]; GO:0008135; GO:0003723; GO:0003676; GO:0097159; GO:1901363; GO:0005488; GO:00036…	metabolic process;regulation of biological process	cytoplasm	catalytic activity;DNA binding;nucleotide binding;RNA binding	rno03013	1		3.17051e+07	3.11763e+07	3.28983e+07	3.10406e+07		0.0775622	-0.00629342	0.0838557		0.576283	0.0300804	0.582202
High	Q5BK63	362440	ENSRNOG00000061684.1	Ndufa9	NADH dehydrogenase [ubiquinone] 1 alpha subcomplex subunit 9, mitochondrial [OS=Rattus norvegicus]	0	44	14	1260	14	1	377	42.5	6092.46	14	[GO:0003674] [GO:0003824]; GO:0003674 [GO:0003854]; GO:0033764; GO:0016229; GO:0016616; GO:0016491; GO:0016614; GO:0003824; GO:0003674 [GO:0003954]; GO:0016651; GO:0016491; GO:0003824; GO:0003674 [GO:0005634]; GO:0043231; GO:0043227; GO:0043229; GO:0043226; GO:0044424; GO:0005575; GO:0005622; GO:0044464; GO:0005623 [GO:0005654]; GO:0031981; GO:0044428; GO:0070013; GO:0005634; GO:0044446; GO:00432…	cell organization and biogenesis;metabolic process;response to stimulus;transport	membrane;mitochondrion;nucleus;organelle lumen	catalytic activity;protein binding	rno05010; rno00190; rno01100; rno05012; rno04932; rno05016	0		3.17039e+07	3.12525e+07	3.45644e+07	2.92949e+07		0.145314	-0.093325	0.238639		1.53054	0.520254	2.00803
High	P05696	24680		Prkca	Protein kinase C alpha type [OS=Rattus norvegicus]	0	46	21	1084	11	1	672	76.7	5134.41	21	[GO:0000166]; GO:0036094; GO:1901265; GO:0005488; GO:0097159; GO:1901363; GO:0003674 [GO:0000188]; GO:0043407; GO:0043405; GO:0043409; GO:0071901; GO:0043408; GO:0071900; GO:0000165; GO:0001933; GO:1902532; GO:0006469; GO:0001932; GO:1902531; GO:0045859; GO:0023014; GO:0035556; GO:0006468; GO:0031400; GO:0042326; GO:0009968; GO:0033673; GO:0031399; GO:0042325; GO:0009966; GO:0043549; GO:0007165; …	cell death;cell differentiation;cell organization and biogenesis;cellular component movement;cellular homeostasis;metabolic process;regulation of biological process;response to stimulus	cytoplasm;cytosol;endoplasmic reticulum;membrane;mitochondrion;nucleus	catalytic activity;metal ion binding;nucleotide binding;protein binding		9		3.14193e+07	3.22229e+07	3.10071e+07	3.10278e+07		-0.0554833	-0.0545234	-0.000959902		0.456744	0.349706	0.00407599
High	Q9QXY2-1	56029	ENSRNOG00000011475.6	Srcin1	SRC kinase signaling inhibitor 1 [OS=Rattus norvegicus]	0	40	31	1252	31	1	1197	129.7	5467.3	31	[GO:0005515]; GO:0005488; GO:0003674 [GO:0005737]; GO:0044424; GO:0005622; GO:0044464; GO:0005575; GO:0005623 [GO:0005856]; GO:0043232; GO:0043228; GO:0043229; GO:0043226; GO:0044424; GO:0005575; GO:0005622; GO:0044464; GO:0005623 [GO:0005886]; GO:0016020; GO:0044464; GO:0071944; GO:0005575; GO:0005623 [GO:0005925]; GO:0005924; GO:0005912; GO:0030055; GO:0070161; GO:0030054; GO:0005575 [GO:000688…	cell organization and biogenesis;regulation of biological process;transport	cytoplasm;cytoskeleton;membrane	protein binding		0		3.13999e+07	3.11266e+07	3.31409e+07	2.99323e+07		0.0904651	-0.0564477	0.146913		1.1235	0.368111	1.34453
High	Q62910-2	85238		Synj1	Isoform 2 of Synaptojanin-1 [OS=Rattus norvegicus]	0	36	28	1036	28	1	1308	144.4	4591.39	28	[GO:0003723]; GO:0003676; GO:0097159; GO:1901363; GO:0005488; GO:0003674 [GO:0004438]; GO:0052744; GO:0052866; GO:0016791; GO:0042578; GO:0016788; GO:0016787; GO:0003824; GO:0003674 [GO:0004439]; GO:0034595; GO:0106019; GO:0052866; GO:0034593; GO:0016791; GO:0042578; GO:0016788; GO:0016787; GO:0003824; GO:0003674 [GO:0005515]; GO:0005488; GO:0003674 [GO:0005622]; GO:0044464; GO:0005575; GO:000562…	cell organization and biogenesis;metabolic process;regulation of biological process;response to stimulus;transport	cytoplasm;cytosol;membrane	catalytic activity;protein binding;RNA binding		0		3.12619e+07	3.05313e+07	3.18017e+07	3.14527e+07		0.0588137	0.0428943	0.0159194		1.05652	0.471411	0.172447
High	Q00715	64647		Hist1h2bl	Histone H2B type 1 [OS=Rattus norvegicus]	0.005	29	3	238	3	1	125	14	1121.41	3	[GO:0000786]; GO:0000785; GO:0032993; GO:0044427; GO:0044815; GO:0032991; GO:0005694; GO:0044446; GO:0005575; GO:0043232; GO:0043229; GO:0044422; GO:0044424; GO:0043228; GO:0043226; GO:0005622; GO:0044464; GO:0005623 [GO:0003677]; GO:0003676; GO:0097159; GO:1901363; GO:0005488; GO:0003674 [GO:0005634]; GO:0043231; GO:0043227; GO:0043229; GO:0043226; GO:0044424; GO:0005575; GO:0005622; GO:0044464;…	cell organization and biogenesis;defense response;response to stimulus	chromosome;nucleus	DNA binding;protein binding	rno05034; rno05203; rno05322	0		3.11262e+07	3.06462e+07	3.44154e+07	2.83171e+07		0.167345	-0.114035	0.28138		0.254501	0.135965	0.576621
High	P10960	25524		Psap	Prosaposin [OS=Rattus norvegicus]	0	19	8	480	8	1	554	61.1	2100.95	8	[GO:0001664]; GO:0005102; GO:0005515; GO:0005488; GO:0003674 [GO:0004565]; GO:0015925; GO:0004553; GO:0016798; GO:0016787; GO:0003824; GO:0003674 [GO:0005543]; GO:0008289; GO:0043168; GO:0005488; GO:0043167; GO:0003674 [GO:0005576]; GO:0005575 [GO:0005615]; GO:0044421; GO:0005575; GO:0005576 [GO:0005737]; GO:0044424; GO:0005622; GO:0044464; GO:0005575; GO:0005623 [GO:0005739]; GO:0043231; GO:0044…	cell differentiation;metabolic process;regulation of biological process;response to stimulus;transport	cytoplasm;extracellular;mitochondrion;vacuole	catalytic activity;enzyme regulator activity;protein binding	rno04142	0		3.1115e+07	3.1017e+07	2.88939e+07	3.34342e+07		-0.102297	0.108262	-0.210559		0.518181	0.430841	1.0382
High	Q63564	117556		Sv2b	Synaptic vesicle glycoprotein 2B [OS=Rattus norvegicus]	0	30	12	463	11	1	683	77.5	1839.8	12	[GO:0001504]; GO:0001505; GO:0006836; GO:0098657; GO:0065008; GO:0006810; GO:0065007; GO:0051234; GO:0008150; GO:0051179 [GO:0001669]; GO:0030141; GO:0097223; GO:0012505; GO:0099503; GO:0044464; GO:0031410; GO:0005575; GO:0005623; GO:0044444; GO:0097708; GO:0005737; GO:0044424; GO:0031982; GO:0043229; GO:0005622; GO:0043227; GO:0043226 [GO:0005215]; GO:0003674 [GO:0006810]; GO:0051234; GO:0051179…	transport	membrane	transporter activity	rno04512	1		3.08434e+07	3.09782e+07	3.14599e+07	3.00922e+07		0.022263	-0.0418609	0.064124		0.171594	0.209062	0.366355
High	P26772	25462		Hspe1	10 kDa heat shock protein, mitochondrial [OS=Rattus norvegicus]	0.006	55	4	359	4	1	102	10.9	1577.49	4	[GO:0001649]; GO:0001503; GO:0030154; GO:0032501; GO:0048869; GO:0008150; GO:0009987; GO:0032502 [GO:0003723]; GO:0003676; GO:0097159; GO:1901363; GO:0005488; GO:0003674 [GO:0005524]; GO:0032559; GO:0035639; GO:0030554; GO:0032555; GO:0043168; GO:1901265; GO:0017076; GO:0032553; GO:0043167; GO:0097159; GO:1901363; GO:0000166; GO:0097367; GO:0005488; GO:0036094; GO:0003674 [GO:0005737]; GO:0044424…	cell differentiation;metabolic process;response to stimulus	cytoplasm;membrane;mitochondrion;organelle lumen	metal ion binding;nucleotide binding;protein binding;RNA binding		0		3.07588e+07	3.01037e+07	3.02369e+07	3.19358e+07		0.00637022	0.0852343	-0.0788641		0.0389957	0.71857	0.791042
High	Q07266-1	81653		Dbn1	drebrin [OS=Rattus norvegicus]	0	45	18	1225	18	1	707	77.4	5576.69	18	[GO:0003779]; GO:0008092; GO:0005515; GO:0005488; GO:0003674 [GO:0005515]; GO:0005488; GO:0003674 [GO:0005522]; GO:0005515; GO:0005488; GO:0003674 [GO:0005622]; GO:0044464; GO:0005575; GO:0005623 [GO:0005737]; GO:0044424; GO:0005622; GO:0044464; GO:0005575; GO:0005623 [GO:0005884]; GO:0015629; GO:0099513; GO:0005856; GO:0044430; GO:0099512; GO:0043232; GO:0044446; GO:0099081; GO:0043228; GO:00432…	cell communication;cell differentiation;cell organization and biogenesis;cell proliferation;development;regulation of biological process;response to stimulus	cytoplasm;cytoskeleton;membrane	protein binding		0		3.07061e+07	3.01949e+07	3.17993e+07	3.01242e+07		0.074688	-0.00338473	0.0780727		1.24818	0.0163387	0.577672
High	P46101	29272		Dpp6	Dipeptidyl aminopeptidase-like protein 6 [OS=Rattus norvegicus]	0	34	19	853	18	1	859	97.2	3529.72	19	[GO:0005515]; GO:0005488; GO:0003674 [GO:0005886]; GO:0016020; GO:0044464; GO:0071944; GO:0005575; GO:0005623 [GO:0006508]; GO:0019538; GO:0043170; GO:0044238; GO:1901564; GO:0071704; GO:0008152; GO:0006807; GO:0008150 [GO:0008076]; GO:0005887; GO:0034705; GO:0044459; GO:0016021; GO:0031226; GO:0034703; GO:0005886; GO:0044425; GO:0044464; GO:0031224; GO:0034702; GO:0016020; GO:0071944; GO:0005575…	cell organization and biogenesis;metabolic process;regulation of biological process	cell surface;membrane	catalytic activity;protein binding		1		3.05524e+07	3.06745e+07	3.05725e+07	3.041e+07		-0.00480414	-0.0124914	0.00768721		0.0371943	0.081949	0.0554932
High	Q99P82	84588		Cldn11	Claudin-11 [OS=Rattus norvegicus]	0.009	7	1	102	1	1	207	22	380.8	1	[GO:0005198]; GO:0003674 [GO:0005886]; GO:0016020; GO:0044464; GO:0071944; GO:0005575; GO:0005623 [GO:0005923]; GO:0043296; GO:0070160; GO:0005911; GO:0030054; GO:0005575 [GO:0007155]; GO:0022610; GO:0008150 [GO:0007283]; GO:0048232; GO:0007276; GO:0019953; GO:0048609; GO:0000003; GO:0044703; GO:0022414; GO:0032504; GO:0008150; GO:0051704; GO:0032501 [GO:0008366]; GO:0007272; GO:0007399; GO:00099…		membrane	protein binding;structural molecule activity		0		3.00602e+07	3.38845e+07	2.93578e+07	2.69384e+07		-0.206884	-0.330964	0.12408		0.397692	0.539248	0.165703
High	Q9QYF3	25017		Myo5a	Unconventional myosin-Va [OS=Rattus norvegicus]	0	29	42	1296	37	1	1828	211.6	5615.82	42	[GO:0000146]; GO:0003774; GO:0017111; GO:0016462; GO:0016818; GO:0016817; GO:0016787; GO:0003824; GO:0003674 [GO:0000149]; GO:0005515; GO:0005488; GO:0003674 [GO:0000166]; GO:0036094; GO:1901265; GO:0005488; GO:0097159; GO:1901363; GO:0003674 [GO:0000445]; GO:0000346; GO:0000347; GO:0043234; GO:0044428; GO:0032991; GO:0005634; GO:0044446; GO:0005575; GO:0043231; GO:0043229; GO:0044422; GO:0044424…	cell communication;cell differentiation;cell organization and biogenesis;cellular component movement;metabolic process;regulation of biological process;response to stimulus;transport	cytoplasm;cytosol;endoplasmic reticulum;endosome;extracellular;Golgi;membrane;vacuole	catalytic activity;metal ion binding;motor activity;nucleotide binding;protein binding;RNA binding		5		3.00224e+07	2.97124e+07	3.04949e+07	2.986e+07		0.0375028	0.00714684	0.030356		0.323944	0.0407775	0.235621
High	O88600	266759		Hspa4	Heat shock 70 kDa protein 4 [OS=Rattus norvegicus]	0	53	30	1214	29	1	840	94	5646.55	30	[GO:0000166]; GO:0036094; GO:1901265; GO:0005488; GO:0097159; GO:1901363; GO:0003674 [GO:0000902]; GO:0032989; GO:0009653; GO:0016043; GO:0048869; GO:0032502; GO:0048856; GO:0009987; GO:0071840; GO:0008150 [GO:0001085]; GO:0008134; GO:0005515; GO:0005488; GO:0003674 [GO:0001822]; GO:0048513; GO:0072001; GO:0048731; GO:0048856; GO:0001655; GO:0007275; GO:0032502; GO:0032501; GO:0008150 [GO:0001933…	cell organization and biogenesis;regulation of biological process;response to stimulus;transport	cytoplasm;cytosol;nucleus	nucleotide binding;protein binding	rno04612	1		2.97598e+07	2.86899e+07	2.87508e+07	3.18385e+07		0.0030584	0.150226	-0.147168		0.0197267	1.01786	1.076
High	Q62658	25639	ENSRNOG00000008822.5	Fkbp1a	Peptidyl-prolyl cis-trans isomerase FKBP1A [OS=Rattus norvegicus]	0	59	6	425	6	1	108	11.9	1852.46	6	[GO:0000413]; GO:0018208; GO:0018193; GO:0006464; GO:0036211; GO:0044267; GO:0019538; GO:0043412; GO:0044260; GO:0043170; GO:0044238; GO:1901564; GO:0044237; GO:0071704; GO:0008152; GO:0006807; GO:0009987; GO:0008150 [GO:0001933]; GO:0001932; GO:0006468; GO:0031400; GO:0042326; GO:0031399; GO:0042325; GO:0006464; GO:0016310; GO:0032269; GO:0045936; GO:0032268; GO:0019220; GO:0036211; GO:0044267; …	cell organization and biogenesis;cell proliferation;cellular homeostasis;metabolic process;regulation of biological process;response to stimulus;transport	cytoplasm;cytosol;endoplasmic reticulum;membrane	catalytic activity;protein binding;signal transducer activity		0		2.9758e+07	2.95436e+07	2.91899e+07	3.05406e+07		-0.0173749	0.0478845	-0.0652594		0.119507	0.244734	0.400437
High	A7VJC2-1	362361		Hnrnpa2b1	heterogeneous nuclear ribonucleoproteins A2/B1 [OS=Rattus norvegicus]	0	39	11	644	9	1	353	37.5	2899.23	11	[GO:0000122]; GO:0006357; GO:0006366; GO:0045892; GO:0006355; GO:0006351; GO:0010629; GO:1903507; GO:2000113; GO:0010468; GO:1903506; GO:2000112; GO:0010467; GO:0034645; GO:0097659; GO:0010605; GO:1902679; GO:0010558; GO:0031327; GO:0060255; GO:2001141; GO:0010556; GO:0031326; GO:0043170; GO:0009059; GO:0044249; GO:0044260; GO:0032774; GO:0009892; GO:0051253; GO:0009890; GO:0031324; GO:0019222; G…	cell differentiation;cell organization and biogenesis;metabolic process;regulation of biological process;response to stimulus;transport	chromosome;cytoplasm;extracellular;membrane;nucleus;spliceosomal complex	DNA binding;protein binding;RNA binding		1		2.90337e+07	2.83125e+07	3.1831e+07	2.69574e+07		0.168993	-0.0707573	0.23975		0.393803	0.116845	0.628665
High	P50554	81632	ENSRNOG00000002636.7	Abat	4-aminobutyrate aminotransferase, mitochondrial [OS=Rattus norvegicus]	0	66	20	1097	20	1	500	56.4	5194.98	20	[GO:0001666]; GO:0006950; GO:0036293; GO:0050896; GO:0070482; GO:0008150; GO:0009628 [GO:0003824]; GO:0003674 [GO:0003867]; GO:0008483; GO:0016769; GO:0016740; GO:0003824; GO:0003674 [GO:0005739]; GO:0043231; GO:0044444; GO:0043227; GO:0043229; GO:0005737; GO:0044424; GO:0043226; GO:0005622; GO:0044464; GO:0005575; GO:0005623 [GO:0005759]; GO:0044429; GO:0070013; GO:0005739; GO:0044444; GO:004444…	metabolic process;regulation of biological process;response to stimulus	mitochondrion;organelle lumen	catalytic activity;metal ion binding;protein binding	rno00650; rno01100; rno00280; rno04727; rno00640; rno00250; rno00410	0		2.90183e+07	2.93553e+07	2.76307e+07	3.00689e+07		-0.0873506	0.0346527	-0.122003		0.832454	0.170526	0.889662
High	P55068	25393		Bcan	Brevican core protein [OS=Rattus norvegicus]	0	34	18	783	18	1	883	96	3772.94	18	[GO:0001501]; GO:0048731; GO:0007275; GO:0048856; GO:0032501; GO:0032502; GO:0008150 [GO:0005201]; GO:0005198; GO:0003674 [GO:0005509]; GO:0046872; GO:0043169; GO:0043167; GO:0005488; GO:0003674 [GO:0005515]; GO:0005488; GO:0003674 [GO:0005540]; GO:0005539; GO:0031406; GO:0097367; GO:0043168; GO:0043177; GO:0005488; GO:0043167; GO:0036094; GO:0003674 [GO:0005576]; GO:0005575 [GO:0005578]; GO:0031…	regulation of biological process	extracellular;membrane	metal ion binding;protein binding;structural molecule activity		0		2.89984e+07	2.80037e+07	2.91161e+07	2.98754e+07		0.0562019	0.0933422	-0.0371403		0.36067	0.806971	0.387275
High	P41565	25179		Idh3g	Isocitrate dehydrogenase [NAD] subunit gamma 1, mitochondrial [OS=Rattus norvegicus]	0	34	8	460	8	1	393	42.8	2484.97	8	[GO:0000166]; GO:0036094; GO:1901265; GO:0005488; GO:0097159; GO:1901363; GO:0003674 [GO:0000287]; GO:0046872; GO:0043169; GO:0043167; GO:0005488; GO:0003674 [GO:0004449]; GO:0004448; GO:0016616; GO:0016614; GO:0016491; GO:0003824; GO:0003674 [GO:0005524]; GO:0032559; GO:0035639; GO:0030554; GO:0032555; GO:0043168; GO:1901265; GO:0017076; GO:0032553; GO:0043167; GO:0097159; GO:1901363; GO:0000166…	metabolic process;regulation of biological process	mitochondrion	catalytic activity;metal ion binding;nucleotide binding		0		2.87481e+07	2.84292e+07	2.95731e+07	2.82421e+07		0.0569129	-0.00952258	0.0664355		0.798884	0.0682576	0.889284
High	Q5U300	314432	ENSRNOG00000019164.7	Uba1	Ubiquitin-like modifier-activating enzyme 1 [OS=Rattus norvegicus]	0	52	30	1741	30	1	1058	117.7	8409.63	30	[GO:0000166]; GO:0036094; GO:1901265; GO:0005488; GO:0097159; GO:1901363; GO:0003674 [GO:0000792]; GO:0000785; GO:0044427; GO:0005694; GO:0044446; GO:0043232; GO:0043229; GO:0044422; GO:0044424; GO:0043228; GO:0043226; GO:0005575; GO:0005622; GO:0044464; GO:0005623 [GO:0003723]; GO:0003676; GO:0097159; GO:1901363; GO:0005488; GO:0003674 [GO:0004839]; GO:0008641; GO:0016877; GO:0016874; GO:0003824…	metabolic process;response to stimulus	cytoplasm;cytosol;membrane;mitochondrion;nucleus	catalytic activity;nucleotide binding;RNA binding	rno04120; rno05012	0		2.87077e+07	2.8412e+07	2.82861e+07	2.94249e+07		-0.00640608	0.0505379	-0.056944		0.0480882	0.337307	0.409628
High	P85515	294010	ENSRNOG00000019725.5	Actr1a	Alpha-centractin [OS=Rattus norvegicus]	0	57	13	909	13	1	376	42.6	4337.67	13	[GO:0000166]; GO:0036094; GO:1901265; GO:0005488; GO:0097159; GO:1901363; GO:0003674 [GO:0002177]; GO:0015630; GO:0044430; GO:0005856; GO:0044446; GO:0043232; GO:0043229; GO:0044422; GO:0044424; GO:0043228; GO:0043226; GO:0005575; GO:0005622; GO:0044464; GO:0005623 [GO:0003674] [GO:0005524]; GO:0032559; GO:0035639; GO:0030554; GO:0032555; GO:0043168; GO:1901265; GO:0017076; GO:0032553; GO:0043167…		cytoplasm;cytoskeleton	nucleotide binding		0		2.8689e+07	2.81208e+07	2.90443e+07	2.8902e+07		0.0466165	0.0395323	0.00708429		0.332806	0.312165	0.0558634
High	Q63716	117254	ENSRNOG00000017194.5	Prdx1	peroxiredoxin-1 [OS=Rattus norvegicus]	0	48	8	461	2	1	199	22.1	1960.73	8	[GO:0000302]; GO:0006979; GO:1901700; GO:0006950; GO:0042221; GO:0050896; GO:0008150 [GO:0001895]; GO:0001894; GO:0048871; GO:0060249; GO:0032501; GO:0042592; GO:0008150; GO:0065008; GO:0065007 [GO:0003723]; GO:0003676; GO:0097159; GO:1901363; GO:0005488; GO:0003674 [GO:0004601]; GO:0016209; GO:0016684; GO:0003674; GO:0016491; GO:0003824 [GO:0005615]; GO:0044421; GO:0005575; GO:0005576 [GO:000563…	cell proliferation;cellular homeostasis;defense response;metabolic process;regulation of biological process;response to stimulus	cytoplasm;cytosol;mitochondrion;nucleus;organelle lumen	antioxidant activity;catalytic activity;protein binding;RNA binding	rno04146	6		2.85983e+07	2.85496e+07	2.67789e+07	3.04664e+07		-0.0923761	0.0937469	-0.186123		1.0898	0.566212	1.33926
High	Q6NYB7	81754	ENSRNOG00000004992.7	Rab1; Rab1a	Ras-related protein Rab-1A [OS=Rattus norvegicus]	0	54	8	675	5	1	205	22.7	3092.55	8	[GO:0000045]; GO:0070925; GO:1905037; GO:0006996; GO:0022607; GO:0007033; GO:0016236; GO:0016043; GO:0044085; GO:0006914; GO:0009987; GO:0071840; GO:0044248; GO:0061919; GO:0008150; GO:0009056; GO:0044237; GO:0008152 [GO:0000139]; GO:0044431; GO:0098588; GO:0098791; GO:0005794; GO:0044444; GO:0044446; GO:0031090; GO:0031984; GO:0012505; GO:0043231; GO:0005737; GO:0044424; GO:0043229; GO:0044422; …	cell organization and biogenesis;cellular component movement;defense response;metabolic process;regulation of biological process;response to stimulus;transport	cytoplasm;cytosol;endoplasmic reticulum;endosome;Golgi;membrane	catalytic activity;nucleotide binding;protein binding	rno05134	2		2.83859e+07	2.71076e+07	2.77705e+07	3.02797e+07		0.0348579	0.159651	-0.124793		0.139322	0.734343	0.579118
High	Q04940	64356	ENSRNOG00000010688.3	Nrgn	Neurogranin [OS=Rattus norvegicus]	0	60	3	504	3	1	78	7.5	2393.42	3	[GO:0005515]; GO:0005488; GO:0003674 [GO:0005516]; GO:0005515; GO:0005488; GO:0003674 [GO:0005547]; GO:1901981; GO:0035091; GO:0005543; GO:0008289; GO:0043168; GO:0005488; GO:0043167; GO:0003674 [GO:0005634]; GO:0043231; GO:0043227; GO:0043229; GO:0043226; GO:0044424; GO:0005575; GO:0005622; GO:0044464; GO:0005623 [GO:0005737]; GO:0044424; GO:0005622; GO:0044464; GO:0005575; GO:0005623 [GO:000830…	regulation of biological process;response to stimulus	cytoplasm;membrane;nucleus	protein binding		0		2.83283e+07	2.68412e+07	2.91474e+07	2.89964e+07		0.118915	0.111424	0.00749114		0.156597	0.139287	0.00913199
High	P29419	140608	ENSRNOG00000000064.4	Atp5i	ATP synthase subunit e, mitochondrial [OS=Rattus norvegicus]	0.005	35	2	264	2	1	71	8.2	1137.16	2	[GO:0000276]; GO:0005753; GO:0045263; GO:0098800; GO:0045259; GO:0033177; GO:0044424; GO:0005743; GO:0044455; GO:0098796; GO:0098798; GO:0016469; GO:0005622; GO:0044464; GO:0019866; GO:0031966; GO:0044425; GO:0044429; GO:0043234; GO:0005575; GO:0005623; GO:0031090; GO:0031967; GO:0005740; GO:0016020; GO:0005739; GO:0044444; GO:0044446; GO:0032991; GO:0043227; GO:0044422; GO:0031975; GO:0043231; G…	metabolic process;transport	membrane;mitochondrion	catalytic activity;transporter activity	rno00190; rno01100	0		2.8288e+07	2.81709e+07	3.01608e+07	2.65323e+07		0.0984694	-0.0864547	0.184924		0.694148	0.439356	1.36421
High	P04897	81664	ENSRNOG00000016592.6	Gnai2	guanine nucleotide-binding protein G(i) subunit alpha-2 [OS=Rattus norvegicus]	0	65	17	1822	11	1	355	40.5	7893.48	17	[GO:0000166]; GO:0036094; GO:1901265; GO:0005488; GO:0097159; GO:1901363; GO:0003674 [GO:0000186]; GO:0032147; GO:0043406; GO:0045860; GO:0043405; GO:0043410; GO:0071902; GO:0001934; GO:0033674; GO:0045859; GO:0043408; GO:0071900; GO:0000165; GO:1902533; GO:0001932; GO:0006468; GO:0031401; GO:0042327; GO:0043549; GO:0051347; GO:1902531; GO:0023014; GO:0035556; GO:0009967; GO:0031399; GO:0042325; …	cell division;cell proliferation;regulation of biological process;response to stimulus	cytoplasm;cytoskeleton;cytosol;membrane;nucleus	catalytic activity;metal ion binding;nucleotide binding;protein binding;signal transducer activity	rno04921; rno04530; rno05034; rno04071; rno04923; rno04261; rno04360; rno05030; rno04540; rno05142; rno05032; rno04723; rno04015; rno05133; rno04024; rno04724; rno04915; rno04914; rno04924; rno04725; rno05145; rno05200; rno04611; rno04730; rno04670; rno05012; rno04727; rno04916; rno04713; rno04971; rno04726; rno04062; rno04022; rno04728	0		2.81492e+07	2.82407e+07	2.84281e+07	2.77789e+07		0.00953973	-0.0237899	0.0333297		0.0571115	0.137918	0.274964
High	53				53	0.006	28	4	259	4	1	231	24.4	1586	4						0		2.80801e+07	2.72958e+07	2.6774e+07	3.01706e+07		-0.0278463	0.144462	-0.172308		0.0284934	0.155852	0.387382
High	Q9Z1T4	59322	ENSRNOG00000007014.7	Cnksr2	Connector enhancer of kinase suppressor of ras 2 [OS=Rattus norvegicus]	0	25	14	432	14	1	1032	117.3	2039.55	14	[GO:0005515]; GO:0005488; GO:0003674 [GO:0005737]; GO:0044424; GO:0005622; GO:0044464; GO:0005575; GO:0005623 [GO:0009966]; GO:0007165; GO:0010646; GO:0023051; GO:0048583; GO:0007154; GO:0009987; GO:0023052; GO:0050794; GO:0051716; GO:0050789; GO:0050896; GO:0008150; GO:0065007 [GO:0014069]; GO:0032279; GO:0097458; GO:0099572; GO:0098984; GO:0044464; GO:0043226; GO:0044456; GO:0098794; GO:0045202…	regulation of biological process	cytoplasm;membrane	protein binding		0		2.79038e+07	2.7794e+07	2.85592e+07	2.7358e+07		0.0391787	-0.0228112	0.0619899		0.611716	0.23776	0.800086
High	B0BNF1	303135		Sept8	Septin-8 [OS=Rattus norvegicus]	0	43	13	941	12	1	442	51.2	4716.15	13	[GO:0000166]; GO:0036094; GO:1901265; GO:0005488; GO:0097159; GO:1901363; GO:0003674 [GO:0005525]; GO:0032550; GO:0032561; GO:0035639; GO:0001883; GO:0032549; GO:0019001; GO:0032555; GO:0043168; GO:1901265; GO:0001882; GO:0017076; GO:0032553; GO:0043167; GO:0097159; GO:1901363; GO:0036094; GO:0097367; GO:0000166; GO:0005488; GO:0003674 [GO:0005737]; GO:0044424; GO:0005622; GO:0044464; GO:0005575;…		cytoplasm;cytoskeleton	nucleotide binding		0		2.78411e+07	2.80914e+07	2.78777e+07	2.75542e+07		-0.0110162	-0.0278562	0.01684		0.151862	0.312378	0.195531
High	P28480	24818	ENSRNOG00000014160.4	Tcp1	T-complex protein 1 subunit alpha [OS=Rattus norvegicus]	0	55	21	1245	21	1	556	60.3	5611.63	21	[GO:0000166]; GO:0036094; GO:1901265; GO:0005488; GO:0097159; GO:1901363; GO:0003674 [GO:0000242]; GO:0005813; GO:0044450; GO:0005815; GO:0044430; GO:0044444; GO:0015630; GO:0005856; GO:0044446; GO:0005737; GO:0044424; GO:0043232; GO:0043229; GO:0044422; GO:0005622; GO:0044464; GO:0043228; GO:0043226; GO:0005575; GO:0005623 [GO:0000792]; GO:0000785; GO:0044427; GO:0005694; GO:0044446; GO:0043232;…	metabolic process;regulation of biological process;transport	cytoplasm;cytoskeleton;Golgi	nucleotide binding;protein binding;RNA binding		0		2.74927e+07	2.71678e+07	2.72308e+07	2.80794e+07		0.00334473	0.0476157	-0.0442709		0.02045	0.30918	0.296534
High	Q7TPB1	29374	ENSRNOG00000009642.3	Cct4	T-complex protein 1 subunit delta [OS=Rattus norvegicus]	0	55	21	1094	20	1	539	58.1	4824.45	21	[GO:0000166]; GO:0036094; GO:1901265; GO:0005488; GO:0097159; GO:1901363; GO:0003674 [GO:0002199]; GO:0043234; GO:0032991; GO:0005575 [GO:0003723]; GO:0003676; GO:0097159; GO:1901363; GO:0005488; GO:0003674 [GO:0005524]; GO:0032559; GO:0035639; GO:0030554; GO:0032555; GO:0043168; GO:1901265; GO:0017076; GO:0032553; GO:0043167; GO:0097159; GO:1901363; GO:0000166; GO:0097367; GO:0005488; GO:0036094…	metabolic process;regulation of biological process;transport	cytoplasm;cytoskeleton;cytosol	nucleotide binding;protein binding;RNA binding		1		2.74824e+07	2.76505e+07	2.77217e+07	2.70749e+07		0.00370687	-0.0303522	0.034059		0.0285568	0.292186	0.310317
High	P0C1X8	500244		Aak1	AP2-associated protein kinase 1 [OS=Rattus norvegicus]	0	64	35	1787	35	1	962	103.7	8408.66	35	[GO:0000166]; GO:0036094; GO:1901265; GO:0005488; GO:0097159; GO:1901363; GO:0003674 [GO:0004672]; GO:0016301; GO:0016773; GO:0140096; GO:0016772; GO:0003824; GO:0016740; GO:0003674 [GO:0004674]; GO:0004672; GO:0016301; GO:0016773; GO:0140096; GO:0016772; GO:0003824; GO:0016740; GO:0003674 [GO:0005112]; GO:0005102; GO:0005515; GO:0005488; GO:0003674 [GO:0005524]; GO:0032559; GO:0035639; GO:003055…	metabolic process;regulation of biological process;transport	membrane	catalytic activity;nucleotide binding;protein binding		0		2.73205e+07	2.71356e+07	2.80555e+07	2.67705e+07		0.0480988	-0.0195412	0.06764		0.739616	0.197946	0.870998
High	P13264-1	24398		Gls	Glutaminase kidney isoform, mitochondrial [OS=Rattus norvegicus]	0	53	23	1281	8	1	674	74	5976.49	23	[GO:0001967]; GO:0007631; GO:0051705; GO:0007610; GO:0051704; GO:0008150 [GO:0002087]; GO:0044065; GO:0050877; GO:0003016; GO:0043576; GO:0044057; GO:0003008; GO:0007585; GO:0051239; GO:0032501; GO:0050789; GO:0008150; GO:0065007 [GO:0004359]; GO:0016811; GO:0016810; GO:0016787; GO:0003824; GO:0003674 [GO:0005515]; GO:0005488; GO:0003674 [GO:0005737]; GO:0044424; GO:0005622; GO:0044464; GO:000557…	cell communication;cell organization and biogenesis;metabolic process;regulation of biological process;response to stimulus	cytoplasm;cytosol;mitochondrion;organelle lumen	catalytic activity;protein binding	rno04964; rno05230; rno04724; rno00471; rno01100; rno05206; rno00220; rno04727; rno00250	15		2.72754e+07	2.7527e+07	2.78711e+07	2.64281e+07		0.0179231	-0.0587732	0.0766963		0.100115	0.331933	0.620021
High	P19234	81728	ENSRNOG00000042503.2	Ndufv2	NADH dehydrogenase [ubiquinone] flavoprotein 2, mitochondrial [OS=Rattus norvegicus]	0	56	9	944	9	1	248	27.4	3978.14	9	[GO:0003674] [GO:0003954]; GO:0016651; GO:0016491; GO:0003824; GO:0003674 [GO:0005575] [GO:0005739]; GO:0043231; GO:0044444; GO:0043227; GO:0043229; GO:0005737; GO:0044424; GO:0043226; GO:0005622; GO:0044464; GO:0005575; GO:0005623 [GO:0005743]; GO:0019866; GO:0031966; GO:0031090; GO:0031967; GO:0044424; GO:0005740; GO:0044429; GO:0016020; GO:0043227; GO:0044422; GO:0031975; GO:0044446; GO:000562…	metabolic process;transport	membrane;mitochondrion	catalytic activity;metal ion binding	rno05010; rno00190; rno01100; rno05012; rno04932; rno05016	0		2.7236e+07	2.7352e+07	2.95193e+07	2.48366e+07		0.110011	-0.139183	0.249194		0.779247	0.697134	1.79926
High	P61980	117282	ENSRNOG00000019113.7	Hnrnpk	Heterogeneous nuclear ribonucleoprotein K [OS=Rattus norvegicus]	0	44	14	1030	14	1	463	50.9	4582.93	14	[GO:0000122]; GO:0006357; GO:0006366; GO:0045892; GO:0006355; GO:0006351; GO:0010629; GO:1903507; GO:2000113; GO:0010468; GO:1903506; GO:2000112; GO:0010467; GO:0034645; GO:0097659; GO:0010605; GO:1902679; GO:0010558; GO:0031327; GO:0060255; GO:2001141; GO:0010556; GO:0031326; GO:0043170; GO:0009059; GO:0044249; GO:0044260; GO:0032774; GO:0009892; GO:0051253; GO:0009890; GO:0031324; GO:0019222; G…	cellular homeostasis;defense response;metabolic process;regulation of biological process;response to stimulus	cytoplasm;cytosol;membrane;mitochondrion;nucleus;spliceosomal complex	DNA binding;protein binding;RNA binding	rno05168; rno05203; rno05206; rno03040	0		2.69526e+07	2.65704e+07	2.87151e+07	2.55723e+07		0.111986	-0.0552397	0.167226		0.520334	0.18964	0.890804
High	Q9Z1E1-1	64665	ENSRNOG00000000826.7	Flot1	Flotillin-1 [OS=Rattus norvegicus]	0	59	19	566	19	1	428	47.5	2448.77	19	[GO:0001765]; GO:0031579; GO:0071709; GO:0061024; GO:0022607; GO:0044091; GO:0016043; GO:0044085; GO:0009987; GO:0071840; GO:0008150 [GO:0001819]; GO:0001816; GO:0001817; GO:0051240; GO:0032501; GO:0051239; GO:0048518; GO:0008150; GO:0050789; GO:0065007 [GO:0001931]; GO:0031254; GO:0120025; GO:0044464; GO:0042995; GO:0005575; GO:0005623 [GO:0001934]; GO:0001932; GO:0006468; GO:0031401; GO:0042327…	cell organization and biogenesis;regulation of biological process;response to stimulus;transport	cytoskeleton;endosome;membrane	protein binding	rno04910	0		2.68359e+07	2.64882e+07	2.81011e+07	2.59185e+07		0.0852753	-0.0313716	0.116647		0.43711	0.132977	0.55741
High	Q63754	113893		Sncb	Beta-synuclein [OS=Rattus norvegicus]	0.004	29	3	175	3	1	137	14.5	805.73	3	[GO:0005509]; GO:0046872; GO:0043169; GO:0043167; GO:0005488; GO:0003674 [GO:0005737]; GO:0044424; GO:0005622; GO:0044464; GO:0005575; GO:0005623 [GO:0005739]; GO:0043231; GO:0044444; GO:0043227; GO:0043229; GO:0005737; GO:0044424; GO:0043226; GO:0005622; GO:0044464; GO:0005575; GO:0005623 [GO:0007268]; GO:0098916; GO:0099537; GO:0099536; GO:0007267; GO:0007154; GO:0023052; GO:0009987; GO:0008150…	cell communication;cell organization and biogenesis;metabolic process;regulation of biological process	cytoplasm;mitochondrion	metal ion binding;protein binding		0		2.66111e+07	2.70841e+07	2.36811e+07	2.9068e+07		-0.193708	0.101984	-0.295692		1.26557	0.425859	1.899
High	Q9WTP0-2	59317		Epb41l1	Isoform L of Band 4.1-like protein 1 [OS=Rattus norvegicus]	0	29	29	700	29	1	1551	170.9	3200.84	29	[GO:0003779]; GO:0008092; GO:0005515; GO:0005488; GO:0003674 [GO:0005102]; GO:0005515; GO:0005488; GO:0003674 [GO:0005198]; GO:0003674 [GO:0005200]; GO:0005198; GO:0003674 [GO:0005737]; GO:0044424; GO:0005622; GO:0044464; GO:0005575; GO:0005623 [GO:0005856]; GO:0043232; GO:0043228; GO:0043229; GO:0043226; GO:0044424; GO:0005575; GO:0005622; GO:0044464; GO:0005623 [GO:0008092]; GO:0005515; GO:0005…	cell organization and biogenesis	cytoplasm;cytoskeleton	protein binding;structural molecule activity		0		2.65906e+07	2.62031e+07	2.68021e+07	2.67667e+07		0.0326058	0.030703	0.00190273		0.282164	0.225624	0.0122621
High	Q9QYU4	117024		Crym	Ketimine reductase mu-crystallin [OS=Rattus norvegicus]	0	44	10	663	10	1	313	33.5	2901.92	10	[GO:0000122]; GO:0006357; GO:0006366; GO:0045892; GO:0006355; GO:0006351; GO:0010629; GO:1903507; GO:2000113; GO:0010468; GO:1903506; GO:2000112; GO:0010467; GO:0034645; GO:0097659; GO:0010605; GO:1902679; GO:0010558; GO:0031327; GO:0060255; GO:2001141; GO:0010556; GO:0031326; GO:0043170; GO:0009059; GO:0044249; GO:0044260; GO:0032774; GO:0009892; GO:0051253; GO:0009890; GO:0031324; GO:0019222; G…	metabolic process;regulation of biological process;response to stimulus;transport	cytoplasm;cytosol;mitochondrion;nucleus	catalytic activity;nucleotide binding;protein binding		0		2.65058e+07	2.6157e+07	2.52296e+07	2.81309e+07		-0.0520819	0.10496	-0.157042		0.245424	0.306291	0.523504
Low	Q71LX6	311098		Xirp2	Xin actin-binding repeat-containing protein 2 [OS=Rattus norvegicus]	0.137	2	3	5	3	1	3302	373.8	17.11	3	[GO:0001725]; GO:0042641; GO:0097517; GO:0015629; GO:0044430; GO:0032432; GO:0005856; GO:0044446; GO:0043232; GO:0043229; GO:0044422; GO:0044424; GO:0043228; GO:0043226; GO:0005575; GO:0005622; GO:0044464; GO:0005623 [GO:0003281]; GO:0003231; GO:0003279; GO:0003205; GO:0048856; GO:0007507; GO:0032502; GO:0048513; GO:0072359; GO:0008150; GO:0048731; GO:0007275; GO:0032501 [GO:0003779]; GO:0008092;…	cell organization and biogenesis		protein binding		0		2.59936e+07	2.65745e+07	2.633e+07	2.50764e+07		-0.013339	-0.083715	0.0703761		0.0716404	0.539056	0.863268
High	Q5M7U6	289820	ENSRNOG00000004959.7	Actr2	Actin-related protein 2 [OS=Rattus norvegicus]	0	40	10	1209	10	1	394	44.7	5207.15	10	[GO:0000166]; GO:0036094; GO:1901265; GO:0005488; GO:0097159; GO:1901363; GO:0003674 [GO:0003779]; GO:0008092; GO:0005515; GO:0005488; GO:0003674 [GO:0005200]; GO:0005198; GO:0003674 [GO:0005515]; GO:0005488; GO:0003674 [GO:0005524]; GO:0032559; GO:0035639; GO:0030554; GO:0032555; GO:0043168; GO:1901265; GO:0017076; GO:0032553; GO:0043167; GO:0097159; GO:1901363; GO:0000166; GO:0097367; GO:000548…	cell division;cell organization and biogenesis;cellular component movement;regulation of biological process;response to stimulus;transport	cytoplasm;cytoskeleton;cytosol;membrane	nucleotide binding;protein binding;structural molecule activity		0		2.5946e+07	2.58098e+07	2.57045e+07	2.63238e+07		-0.00589995	0.0284472	-0.0343472		0.0522656	0.151792	0.194362
High	P30904	81683; 103694877	ENSRNOG00000006589.4; ENSRNOG00000056076.1	Mif; LOC103694877	Macrophage Migration inhibitory factor [OS=Rattus norvegicus]	0.01	18	2	80	2	1	115	12.5	271.95	2	[GO:0001516]; GO:0006693; GO:0046457; GO:0006692; GO:0006636; GO:0046456; GO:0006690; GO:0033559; GO:0006633; GO:0046394; GO:1901570; GO:0019752; GO:1901568; GO:0006631; GO:0008610; GO:0072330; GO:0016053; GO:1901576; GO:0043436; GO:0071704; GO:0032787; GO:0044255; GO:0006629; GO:0006082; GO:0044249; GO:0044283; GO:0009058; GO:0008152; GO:0044237; GO:0044238; GO:0044281; GO:0008150; GO:0009987 [G…	cell organization and biogenesis;cell proliferation;defense response;metabolic process;regulation of biological process;response to stimulus	cell surface;cytoplasm;cytosol;extracellular;nucleus	catalytic activity;protein binding	rno00350; rno00360	0		2.57766e+07	2.5444e+07	2.52228e+07	2.6663e+07		-0.0125999	0.0675129	-0.0801128		0.0878213	0.610219	0.670186
High	P10824	25686	ENSRNOG00000057096.1	Gnai1	Guanine nucleotide-binding protein G(i) subunit alpha-1 [OS=Rattus norvegicus]	0	64	18	1911	11	1	354	40.3	8578.9	18	[GO:0000166]; GO:0036094; GO:1901265; GO:0005488; GO:0097159; GO:1901363; GO:0003674 [GO:0000287]; GO:0046872; GO:0043169; GO:0043167; GO:0005488; GO:0003674 [GO:0001501]; GO:0048731; GO:0007275; GO:0048856; GO:0032501; GO:0032502; GO:0008150 [GO:0001508]; GO:0042391; GO:0065008; GO:0065007; GO:0008150 [GO:0001664]; GO:0005102; GO:0005515; GO:0005488; GO:0003674 [GO:0003924]; GO:0017111; GO:00164…	cell division;cell organization and biogenesis;regulation of biological process;response to stimulus;transport	cytoplasm;cytoskeleton;membrane;nucleus	catalytic activity;enzyme regulator activity;metal ion binding;nucleotide binding;protein binding;signal transducer activity	rno04921; rno04530; rno05034; rno04071; rno04923; rno04261; rno04360; rno05030; rno04540; rno05142; rno05032; rno04723; rno04015; rno05133; rno04024; rno04724; rno04915; rno04914; rno04924; rno04725; rno05145; rno05200; rno04611; rno04730; rno04670; rno05012; rno04727; rno04916; rno04713; rno04971; rno04726; rno04062; rno04022; rno04728	3		2.56458e+07	2.5923e+07	2.57603e+07	2.52542e+07		-0.00908378	-0.0377085	0.0286247		0.0496424	0.22942	0.205742
High	Q62747-2	59267	ENSRNOG00000026432.7	Syt7	Isoform 2 of Synaptotagmin-7 [OS=Rattus norvegicus]	0.005	15	8	248	8	1	687	75.8	1060.45	8	[GO:0000149]; GO:0005515; GO:0005488; GO:0003674 [GO:0001778]; GO:0007009; GO:0042060; GO:0010256; GO:0061024; GO:0009611; GO:0016043; GO:0006950; GO:0009987; GO:0071840; GO:0050896; GO:0008150 [GO:0001786]; GO:0005543; GO:0072341; GO:0008289; GO:0043168; GO:0005488; GO:0043167; GO:0003674 [GO:0005509]; GO:0046872; GO:0043169; GO:0043167; GO:0005488; GO:0003674 [GO:0005513]; GO:0009593; GO:005159…	cell organization and biogenesis;regulation of biological process;response to stimulus;transport	cytosol;membrane;vacuole	metal ion binding;protein binding		0		2.52772e+07	2.44965e+07	2.49076e+07	2.64275e+07		0.0240132	0.109465	-0.0854518		0.0316001	0.160056	0.247449
High	P11348	64192	ENSRNOG00000003253.4	Qdpr	dihydropteridine reductase [OS=Rattus norvegicus]	0	54	8	410	8	1	241	25.5	1990.39	8	[GO:0001889]; GO:0048732; GO:0061008; GO:0048513; GO:0048731; GO:0048856; GO:0007275; GO:0032502; GO:0032501; GO:0008150 [GO:0004155]; GO:0016646; GO:0016645; GO:0016491; GO:0003824; GO:0003674 [GO:0005737]; GO:0044424; GO:0005622; GO:0044464; GO:0005575; GO:0005623 [GO:0005739]; GO:0043231; GO:0044444; GO:0043227; GO:0043229; GO:0005737; GO:0044424; GO:0043226; GO:0005622; GO:0044464; GO:0005575…	metabolic process;response to stimulus	cytoplasm;cytosol;mitochondrion	catalytic activity;nucleotide binding;protein binding	rno00790; rno01100	0		2.51267e+07	2.54808e+07	2.26904e+07	2.7209e+07		-0.167331	0.0946743	-0.262005		1.19225	0.289221	1.14019
High	Q9WU82	84353		Ctnnb1	Catenin beta-1 [OS=Rattus norvegicus]	0	58	24	1406	20	1	781	85.4	6285.77	24	(content is truncated) [GO:0000122]; GO:0006357; GO:0006366; GO:0045892; GO:0006355; GO:0006351; GO:0010629; GO:1903507; GO:2000113; GO:0010468; GO:1903506; GO:2000112; GO:0010467; GO:0034645; GO:0097659; GO:0010605; GO:1902679; GO:0010558; GO:0031327; GO:0060255; GO:2001141; GO:0010556; GO:0031326; GO:0043170; GO:0009059; GO:0044249; GO:0044260; GO:0032774; GO:0009892; GO:0051253; GO:0009890; GO…	cell communication;cell differentiation;cell growth;cell organization and biogenesis;cell proliferation;cellular component movement;metabolic process;regulation of biological process;response to stimulus;transport	cytoplasm;cytoskeleton;cytosol;membrane;nucleus	DNA binding;protein binding;signal transducer activity	rno05213; rno04530; rno04510; rno04015; rno05215; rno04520; rno04550; rno05217; rno05100; rno05200; rno05216; rno04670; rno04916; rno05205; rno05412; rno05166; rno05210; rno04919; rno04310; rno05224; rno04390	3		2.5008e+07	2.48213e+07	2.62233e+07	2.39793e+07		0.0792682	-0.0497903	0.129058		1.74585	0.395997	1.42584
High	P04692-5	24851		Tpm1	Isoform 5 of Tropomyosin alpha-1 chain [OS=Rattus norvegicus]	0	39	11	490	5	1	245	28.3	1956.27	11	[GO:0001701]; GO:0043009; GO:0009792; GO:0009790; GO:0007275; GO:0032501; GO:0048856; GO:0008150; GO:0032502 [GO:0001725]; GO:0042641; GO:0097517; GO:0015629; GO:0044430; GO:0032432; GO:0005856; GO:0044446; GO:0043232; GO:0043229; GO:0044422; GO:0044424; GO:0043228; GO:0043226; GO:0005575; GO:0005622; GO:0044464; GO:0005623 [GO:0003065]; GO:0001996; GO:0003062; GO:0010460; GO:0003321; GO:0002027;…	cell organization and biogenesis;cellular component movement;regulation of biological process;response to stimulus	cytoplasm;cytoskeleton;cytosol	protein binding;structural molecule activity		4		2.47065e+07	2.61362e+07	2.37369e+07	2.42464e+07		-0.138917	-0.108281	-0.0306361		0.592968	0.424293	0.475141
High	P26453-1	25246	ENSRNOG00000008414.8	Bsg	Basigin [OS=Rattus norvegicus]	0.006	21	6	394	6	1	388	42.4	1633.24	6	[GO:0002080]; GO:0001669; GO:0030667; GO:0097223; GO:0030141; GO:0030659; GO:0098588; GO:0098805; GO:0044464; GO:0012505; GO:0099503; GO:0012506; GO:0044433; GO:0031090; GO:0016020; GO:0005575; GO:0005623; GO:0031410; GO:0031982; GO:0044444; GO:0044446; GO:0043227; GO:0044422; GO:0097708; GO:0005737; GO:0044424; GO:0043229; GO:0043226; GO:0005622 [GO:0005515]; GO:0005488; GO:0003674 [GO:0005537];…	cell organization and biogenesis;response to stimulus	membrane;mitochondrion	protein binding		0		2.46578e+07	2.45446e+07	2.42363e+07	2.51926e+07		-0.0182384	0.0375907	-0.055829		0.0903287	0.227355	0.337945
High	P97536	117152	ENSRNOG00000007834.5	Cand1	cullin-associated nedd8-dissociated protein 1 [OS=Rattus norvegicus]	0	43	30	1383	30	1	1230	136.3	6137.29	30	[GO:0000151]; GO:0044424; GO:1990234; GO:0005622; GO:0044464; GO:1902494; GO:0005575; GO:0005623; GO:0032991 [GO:0005488]; GO:0003674 [GO:0005634]; GO:0043231; GO:0043227; GO:0043229; GO:0043226; GO:0044424; GO:0005575; GO:0005622; GO:0044464; GO:0005623 [GO:0005654]; GO:0031981; GO:0044428; GO:0070013; GO:0005634; GO:0044446; GO:0043229; GO:0043233; GO:0044424; GO:0043231; GO:0044422; GO:0043226…	cell differentiation;cell organization and biogenesis;metabolic process;regulation of biological process	cytoplasm;cytosol;Golgi;membrane;nucleus	protein binding		0		2.46129e+07	2.4972e+07	2.53913e+07	2.34755e+07		0.0240238	-0.0891544	0.113178		0.169075	0.73115	0.996685
High	Q5XIF3	499529	ENSRNOG00000011383.5	Ndufs4	NADH dehydrogenase [ubiquinone] iron-sulfur protein 4, mitochondrial [OS=Rattus norvegicus]	0	42	6	436	6	1	175	19.7	1899.23	6	[GO:0001932]; GO:0006468; GO:0031399; GO:0042325; GO:0006464; GO:0016310; GO:0032268; GO:0019220; GO:0036211; GO:0044267; GO:0006796; GO:0031323; GO:0051246; GO:0051174; GO:0019538; GO:0043412; GO:0044260; GO:0006793; GO:0019222; GO:0044237; GO:0050794; GO:0051171; GO:0060255; GO:0080090; GO:0043170; GO:0044238; GO:1901564; GO:0008152; GO:0050789; GO:0009987; GO:0006807; GO:0071704; GO:0008150; G…	cell organization and biogenesis;metabolic process;regulation of biological process;response to stimulus;transport	membrane;mitochondrion	catalytic activity	rno05010; rno00190; rno01100; rno05012; rno04932; rno05016	0		2.4534e+07	2.44095e+07	2.62506e+07	2.29418e+07		0.104909	-0.089462	0.194371		0.833189	0.445912	1.38422
High	Q8CFN2	64465	ENSRNOG00000013536.7	Cdc42	Cell division control protein 42 homolog [OS=Rattus norvegicus]	0	74	9	949	1	1	191	21.2	4209.44	9	[GO:0000139]; GO:0044431; GO:0098588; GO:0098791; GO:0005794; GO:0044444; GO:0044446; GO:0031090; GO:0031984; GO:0012505; GO:0043231; GO:0005737; GO:0044424; GO:0043229; GO:0044422; GO:0016020; GO:0043227; GO:0044464; GO:0005622; GO:0043226; GO:0005575; GO:0005623 [GO:0000166]; GO:0036094; GO:1901265; GO:0005488; GO:0097159; GO:1901363; GO:0003674 [GO:0000322]; GO:0005773; GO:0043231; GO:0044444;…	cell communication;cell differentiation;cell division;cell organization and biogenesis;cellular component movement;metabolic process;regulation of biological process;response to stimulus;transport	cytoplasm;cytoskeleton;cytosol;membrane;vacuole	catalytic activity;nucleotide binding;protein binding	rno04912; rno04530; rno04010; rno05203; rno04722; rno04360; rno04933; rno04510; rno04015; rno04370; rno04666; rno04660; rno04520; rno05211; rno04810; rno05212; rno05100; rno05200; rno04014; rno04670; rno05205; rno04932; rno04144; rno05132; rno04062	7		2.42886e+07	2.4237e+07	2.3924e+07	2.47047e+07		-0.0187528	0.0275725	-0.0463254		0.113089	0.183512	0.322801
High	P60905	79130	ENSRNOG00000015202.3	Dnajc5	DnaJ homolog subfamily C member 5 [OS=Rattus norvegicus]	0	46	7	575	7	1	198	22.1	2609.54	7	[GO:0005515]; GO:0005488; GO:0003674 [GO:0005739]; GO:0043231; GO:0044444; GO:0043227; GO:0043229; GO:0005737; GO:0044424; GO:0043226; GO:0005622; GO:0044464; GO:0005575; GO:0005623 [GO:0005765]; GO:0005764; GO:0098852; GO:0000323; GO:0005774; GO:0005773; GO:0044437; GO:0098588; GO:0098805; GO:0043231; GO:0044444; GO:0044446; GO:0031090; GO:0016020; GO:0043227; GO:0043229; GO:0005737; GO:0044424;…	cell communication;regulation of biological process	membrane;mitochondrion	protein binding	rno04141	0		2.41817e+07	2.23345e+07	2.69764e+07	2.32342e+07		0.272424	0.0569738	0.21545		1.86029	0.180387	1.41411
High	P47858	65152		Pfkm	ATP-dependent 6-phosphofructokinase, muscle type [OS=Rattus norvegicus]	0	42	19	946	18	1	780	85.5	4493.3	19	[GO:0000166]; GO:0036094; GO:1901265; GO:0005488; GO:0097159; GO:1901363; GO:0003674 [GO:0001678]; GO:0042593; GO:0055082; GO:0033500; GO:0019725; GO:0048878; GO:0009987; GO:0042592; GO:0008150; GO:0065008; GO:0065007 [GO:0003824]; GO:0003674 [GO:0003872]; GO:0008443; GO:0016773; GO:0019200; GO:0016772; GO:0016301; GO:0016740; GO:0003824; GO:0003674 [GO:0005524]; GO:0032559; GO:0035639; GO:003055…	cell organization and biogenesis;cellular homeostasis;metabolic process;regulation of biological process	cytoplasm;cytosol;membrane	catalytic activity;metal ion binding;nucleotide binding;protein binding	rno00010; rno00052; rno05230; rno00030; rno01230; rno01100; rno03018; rno04152; rno00051; rno01200	0		2.40762e+07	2.32371e+07	2.30977e+07	2.58939e+07		-0.00868222	0.156185	-0.164868		0.0588714	1.20046	1.42219
High	P32736-1	116597		Opcml	Opioid-binding protein/cell adhesion molecule [OS=Rattus norvegicus]	0	37	9	844	8	1	345	38	3964.79	9	[GO:0005515]; GO:0005488; GO:0003674 [GO:0005886]; GO:0016020; GO:0044464; GO:0071944; GO:0005575; GO:0005623 [GO:0007155]; GO:0022610; GO:0008150 [GO:0016020]; GO:0005575 [GO:0031225]; GO:0031224; GO:0044425; GO:0005575; GO:0016020 [GO:0070062]; GO:0005615; GO:1903561; GO:0044421; GO:0031982; GO:0043230; GO:0005575; GO:0005576; GO:0043227; GO:0043226		membrane	protein binding		1		2.39377e+07	2.39466e+07	2.42486e+07	2.36178e+07		0.0180845	-0.0199449	0.0380294		0.2373	0.125303	0.29224
High	Q62813-2	29561		Lsamp	Isoform 2 of Limbic system-associated membrane protein [OS=Rattus norvegicus]	0	27	7	932	7	1	361	39.8	3942.82	7	[GO:0005515]; GO:0005488; GO:0003674 [GO:0005886]; GO:0016020; GO:0044464; GO:0071944; GO:0005575; GO:0005623 [GO:0007155]; GO:0022610; GO:0008150 [GO:0016020]; GO:0005575 [GO:0016021]; GO:0031224; GO:0044425; GO:0005575; GO:0016020 [GO:0031225]; GO:0031224; GO:0044425; GO:0005575; GO:0016020 [GO:0035641]; GO:0007626; GO:0035640; GO:0007610; GO:0008150	response to stimulus	membrane	protein binding		0		2.39028e+07	2.31603e+07	2.50183e+07	2.35299e+07		0.111327	0.022838	0.0884893		0.994828	0.119421	0.633381
High	Q62656	25613		Ptprz1	Receptor-type tyrosine-protein phosphatase zeta [OS=Rattus norvegicus]	0	10	15	646	15	1	2316	255.2	2941.82	15	[GO:0002244]; GO:0030097; GO:0030154; GO:0048534; GO:0048869; GO:0002520; GO:0048513; GO:0009987; GO:0032502; GO:0002376; GO:0048731; GO:0048856; GO:0008150; GO:0007275; GO:0032501 [GO:0004721]; GO:0016791; GO:0140096; GO:0042578; GO:0003824; GO:0016788; GO:0003674; GO:0016787 [GO:0004725]; GO:0004721; GO:0016791; GO:0140096; GO:0042578; GO:0003824; GO:0016788; GO:0003674; GO:0016787 [GO:0005515]…	cell differentiation;cell organization and biogenesis;metabolic process;regulation of biological process;response to stimulus	cytoplasm;extracellular;membrane	catalytic activity;protein binding		0		2.38939e+07	2.39085e+07	2.38781e+07	2.3895e+07		-0.00183391	-0.000817721	-0.00101619		0.0122267	0.00537545	0.00807411
High	P05197	29565	ENSRNOG00000020266.5	Eef2	Elongation factor 2 [OS=Rattus norvegicus]	0	47	27	1336	27	1	858	95.2	6343.56	27	[GO:0000166]; GO:0036094; GO:1901265; GO:0005488; GO:0097159; GO:1901363; GO:0003674 [GO:0002039]; GO:0005515; GO:0005488; GO:0003674 [GO:0002244]; GO:0030097; GO:0030154; GO:0048534; GO:0048869; GO:0002520; GO:0048513; GO:0009987; GO:0032502; GO:0002376; GO:0048731; GO:0048856; GO:0008150; GO:0007275; GO:0032501 [GO:0002931]; GO:0006950; GO:0050896; GO:0008150 [GO:0003009]; GO:0006941; GO:005088…	cell differentiation;cell proliferation;metabolic process;regulation of biological process;response to stimulus	cytoplasm;cytosol;membrane;nucleus;ribosome	catalytic activity;nucleotide binding;protein binding;RNA binding	rno04921; rno04152	0		2.38295e+07	2.35589e+07	2.371e+07	2.42195e+07		0.00922349	0.0398939	-0.0306704		0.0780145	0.402268	0.280763
High	Q5XI73	360678	ENSRNOG00000036688.2	Arhgdia	rho GDP-dissociation inhibitor 1 [OS=Rattus norvegicus]	0	50	9	672	9	1	204	23.4	3148.66	9	[GO:0001772]; GO:0044459; GO:0005886; GO:0044425; GO:0044464; GO:0016020; GO:0071944; GO:0005575; GO:0005623 [GO:0005094]; GO:0005092; GO:0030695; GO:0060589; GO:0030234; GO:0098772; GO:0003674 [GO:0005096]; GO:0008047; GO:0030695; GO:0030234; GO:0060589; GO:0098772; GO:0003674 [GO:0005504]; GO:0008289; GO:0033293; GO:0005488; GO:0031406; GO:0003674; GO:0043168; GO:0043177; GO:0043167; GO:0036094…	regulation of biological process;response to stimulus	cytoplasm;cytosol;membrane;nucleus	enzyme regulator activity;protein binding	rno04722; rno04962	0		2.37543e+07	2.31149e+07	2.22299e+07	2.59182e+07		-0.0563197	0.165144	-0.221463		0.44722	1.1198	1.64825
High	P62138	24668	ENSRNOG00000018708.6	Ppp1ca	serine/threonine-protein phosphatase PP1-alpha catalytic subunit [OS=Rattus norvegicus]	0	58	13	1089	3	1	330	37.5	5324.33	13	[GO:0000164]; GO:0008287; GO:0044444; GO:0044464; GO:1903293; GO:0005737; GO:0044424; GO:0005575; GO:0005623; GO:1902494; GO:0005622; GO:0032991 [GO:0000784]; GO:0000781; GO:0044454; GO:0098687; GO:0000228; GO:0044427; GO:0044428; GO:0005694; GO:0031981; GO:0044446; GO:0005634; GO:0043232; GO:0070013; GO:0043229; GO:0044422; GO:0044424; GO:0043231; GO:0043228; GO:0043233; GO:0043226; GO:0005575; …	cell division;metabolic process;regulation of biological process;response to stimulus	cytoplasm;cytosol;membrane;nucleus	catalytic activity;metal ion binding;protein binding	rno04921; rno05168; rno05034; rno04261; rno03015; rno04510; rno04024; rno04810; rno04611; rno04114; rno04931; rno05205; rno05031; rno04270; rno04750; rno04022; rno04720; rno04910; rno04728; rno04390	10		2.37042e+07	2.3757e+07	2.45603e+07	2.27953e+07		0.0479766	-0.0596127	0.107589		0.679612	0.514364	1.32641
High	Q66HD0-1	362862		Hsp90b1	Endoplasmin [OS=Rattus norvegicus]	0	39	25	948	24	1	804	92.7	4402.7	25	[GO:0000166]; GO:0036094; GO:1901265; GO:0005488; GO:0097159; GO:1901363; GO:0003674 [GO:0001666]; GO:0006950; GO:0036293; GO:0050896; GO:0070482; GO:0008150; GO:0009628 [GO:0003723]; GO:0003676; GO:0097159; GO:1901363; GO:0005488; GO:0003674 [GO:0005524]; GO:0032559; GO:0035639; GO:0030554; GO:0032555; GO:0043168; GO:1901265; GO:0017076; GO:0032553; GO:0043167; GO:0097159; GO:1901363; GO:0000166…	cell organization and biogenesis;metabolic process;regulation of biological process;response to stimulus;transport	cytosol;endoplasmic reticulum;membrane;nucleus;organelle lumen	nucleotide binding;protein binding;RNA binding	rno05215; rno04915; rno04141; rno04151; rno05200; rno04918	0		2.35517e+07	2.32717e+07	2.30502e+07	2.43333e+07		-0.0137917	0.0643592	-0.0781509		0.0956362	0.420945	0.571727
High	Q9ERH3	66031	ENSRNOG00000018387.4	Wdr7	WD repeat-containing protein 7 [OS=Rattus norvegicus]	0	42	33	1173	33	1	1488	163.1	4986.25	33	[GO:0002244]; GO:0030097; GO:0030154; GO:0048534; GO:0048869; GO:0002520; GO:0048513; GO:0009987; GO:0032502; GO:0002376; GO:0048731; GO:0048856; GO:0008150; GO:0007275; GO:0032501 [GO:0005488]; GO:0003674 [GO:0005515]; GO:0005488; GO:0003674 [GO:0008021]; GO:0044456; GO:0070382; GO:0097458; GO:0098793; GO:0005575; GO:0045202; GO:0030133; GO:0099503; GO:0044464; GO:0012505; GO:0031410; GO:0005623…	cell differentiation		protein binding		0		2.3494e+07	2.33941e+07	2.44773e+07	2.26105e+07		0.0653009	-0.0491518	0.114453		0.749519	0.325098	1.05359
High	P19490-1	50592		Gria1	Glutamate receptor 1 [OS=Rattus norvegicus]	0	33	21	1315	17	1	907	101.5	6051.17	21	[GO:0001540]; GO:0042277; GO:0033218; GO:0005488; GO:0003674 [GO:0001919]; GO:0001881; GO:0023051; GO:0031323; GO:0060255; GO:0043112; GO:0023052; GO:0050789; GO:0019222; GO:0044237; GO:0050794; GO:0043170; GO:0044260; GO:0008150; GO:0065007; GO:0008152; GO:0009987; GO:0071704 [GO:0001965]; GO:0005515; GO:0005488; GO:0003674 [GO:0004872]; GO:0060089; GO:0003674 [GO:0004970]; GO:0008066; GO:002282…	cell communication;metabolic process;regulation of biological process;response to stimulus;transport	cell surface;cytosol;endoplasmic reticulum;endosome;membrane	protein binding;receptor activity;signal transducer activity;transporter activity	rno04723; rno04024; rno04724; rno04080; rno04730; rno05014; rno05033; rno04713; rno05031; rno04720; rno04728	1		2.33612e+07	2.31765e+07	2.54082e+07	2.14989e+07		0.132627	-0.1084	0.241027		2.0091	0.607513	2.11399
High	P07895	24787	ENSRNOG00000019048.4	Sod2	Superoxide dismutase [Mn], mitochondrial [OS=Rattus norvegicus]	0	53	6	926	6	1	222	24.7	4205.12	6	[GO:0000302]; GO:0006979; GO:1901700; GO:0006950; GO:0042221; GO:0050896; GO:0008150 [GO:0000303]; GO:0000305; GO:0000302; GO:0010035; GO:0006979; GO:1901700; GO:0042221; GO:0006950; GO:0050896; GO:0008150 [GO:0001306]; GO:0006979; GO:0007571; GO:0006950; GO:0007568; GO:0032502; GO:0050896; GO:0008150 [GO:0001315]; GO:0000302; GO:0001306; GO:0006979; GO:1901700; GO:0007571; GO:0006950; GO:0042221…	cell differentiation;cell organization and biogenesis;metabolic process;regulation of biological process;response to stimulus	cytoplasm;membrane;mitochondrion;organelle lumen	antioxidant activity;catalytic activity;DNA binding;metal ion binding;protein binding	rno04211; rno04213; rno04068; rno04146; rno05016	0		2.33554e+07	2.29102e+07	2.31681e+07	2.39878e+07		0.0161527	0.0663134	-0.0501607		0.108123	0.379201	0.283781
High	Q5U2Z3	361684	ENSRNOG00000020615.7	Nap1l4	Nucleosome assembly protein 1-like 4 [OS=Rattus norvegicus]	0.004	39	10	206	9	1	386	43.9	984.3	10	[GO:0003723]; GO:0003676; GO:0097159; GO:1901363; GO:0005488; GO:0003674 [GO:0005634]; GO:0043231; GO:0043227; GO:0043229; GO:0043226; GO:0044424; GO:0005575; GO:0005622; GO:0044464; GO:0005623 [GO:0005737]; GO:0044424; GO:0005622; GO:0044464; GO:0005575; GO:0005623 [GO:0006334]; GO:0031497; GO:0034728; GO:0065004; GO:0006323; GO:0006333; GO:0022607; GO:0006325; GO:0071824; GO:0034622; GO:0071103…	cell organization and biogenesis	cytoplasm;nucleus	protein binding;RNA binding		1		2.31937e+07	2.40996e+07	2.26668e+07	2.28145e+07		-0.0884302	-0.0790589	-0.0093713		0.188936	0.137667	0.0147281
High	Q3T1K5	493810	ENSRNOG00000056207.1	Capza2	F-actin-capping protein subunit alpha-2 [OS=Rattus norvegicus]	0	50	9	892	8	1	286	32.9	4367.49	9	[GO:0003779]; GO:0008092; GO:0005515; GO:0005488; GO:0003674 [GO:0005903]; GO:0098862; GO:0044464; GO:0005575; GO:0005623 [GO:0008290]; GO:0015629; GO:0043234; GO:0044430; GO:0005856; GO:0032991; GO:0044446; GO:0043232; GO:0005575; GO:0043229; GO:0044422; GO:0044424; GO:0043228; GO:0043226; GO:0005622; GO:0044464; GO:0005623 [GO:0016020]; GO:0005575 [GO:0030863]; GO:0005856; GO:0044448; GO:004323…	cell organization and biogenesis;regulation of biological process	cytoskeleton;membrane	protein binding	rno04144	1		2.31651e+07	2.28653e+07	2.36699e+07	2.296e+07		0.0498883	0.00596092	0.0439274		0.387768	0.023748	0.220881
High	Q62951	25417		Dpysl4	dihydropyrimidinase-related protein 4 [OS=Rattus norvegicus]	0	47	15	893	15	1	564	61	3910.49	15	[GO:0005515]; GO:0005488; GO:0003674 [GO:0005737]; GO:0044424; GO:0005622; GO:0044464; GO:0005575; GO:0005623 [GO:0016787]; GO:0003824; GO:0003674 [GO:0016810]; GO:0016787; GO:0003824; GO:0003674 [GO:0031005]; GO:0008092; GO:0005515; GO:0005488; GO:0003674 [GO:0048666]; GO:0030182; GO:0048468; GO:0030154; GO:0048699; GO:0048856; GO:0048869; GO:0022008; GO:0032502; GO:0009987; GO:0007399; GO:00081…	cell death;cellular component movement	cytoplasm	catalytic activity;protein binding		0		2.28194e+07	2.2614e+07	2.09602e+07	2.48839e+07		-0.109564	0.138	-0.247564		0.647482	0.656661	1.41573
High	P27139	54231	ENSRNOG00000009629.6	Ca2; Car2	Carbonic anhydrase 2 [OS=Rattus norvegicus]	0	56	11	574	11	1	260	29.1	2375.17	11	[GO:0001822]; GO:0048513; GO:0072001; GO:0048731; GO:0048856; GO:0001655; GO:0007275; GO:0032502; GO:0032501; GO:0008150 [GO:0002009]; GO:0048729; GO:0060429; GO:0009653; GO:0009888; GO:0032502; GO:0048856; GO:0008150 [GO:0004064]; GO:0052689; GO:0016788; GO:0016787; GO:0003824; GO:0003674 [GO:0004089]; GO:0016836; GO:0016835; GO:0016829; GO:0003824; GO:0003674 [GO:0005515]; GO:0005488; GO:000367…	cell differentiation;cellular homeostasis;metabolic process;regulation of biological process;response to stimulus;transport	cytoplasm;cytosol;membrane	catalytic activity;metal ion binding;protein binding	rno04972; rno04964; rno00910; rno04966; rno04971; rno04976	0		2.27906e+07	2.23213e+07	2.04218e+07	2.56285e+07		-0.128308	0.199328	-0.327636		0.905218	0.873344	1.7875
High	Q9ERB4	114122		Vcan	Versican core protein [OS=Rattus norvegicus]	0	7	13	669	13	1	2738	299.8	3065.41	13	[GO:0001501]; GO:0048731; GO:0007275; GO:0048856; GO:0032501; GO:0032502; GO:0008150 [GO:0001649]; GO:0001503; GO:0030154; GO:0032501; GO:0048869; GO:0008150; GO:0009987; GO:0032502 [GO:0001657]; GO:0072164; GO:0035295; GO:0072163; GO:0007275; GO:0048856; GO:0001823; GO:0072073; GO:0032501; GO:0032502; GO:0001822; GO:0060429; GO:0008150; GO:0048513; GO:0072001; GO:0009888; GO:0048731; GO:0001655 …	cell differentiation;cell organization and biogenesis;cellular component movement;response to stimulus	cell surface;extracellular;membrane	metal ion binding;protein binding;structural molecule activity	rno04514	0		2.2633e+07	2.3101e+07	2.18645e+07	2.29334e+07		-0.0793658	-0.0105069	-0.0688589		0.568077	0.0498462	0.502231
High	P97710	25528	ENSRNOG00000004763.7	Sirpa	tyrosine-protein phosphatase non-receptor type substrate 1 [OS=Rattus norvegicus]	0	28	8	595	8	1	509	55.7	2520.72	8	[GO:0002244]; GO:0030097; GO:0030154; GO:0048534; GO:0048869; GO:0002520; GO:0048513; GO:0009987; GO:0032502; GO:0002376; GO:0048731; GO:0048856; GO:0008150; GO:0007275; GO:0032501 [GO:0005515]; GO:0005488; GO:0003674 [GO:0005886]; GO:0016020; GO:0044464; GO:0071944; GO:0005575; GO:0005623 [GO:0005887]; GO:0016021; GO:0031226; GO:0031224; GO:0044459; GO:0044425; GO:0005886; GO:0044464; GO:0005575…	cell differentiation;cell organization and biogenesis;cellular component movement;regulation of biological process	membrane	protein binding	rno04380	0		2.2576e+07	2.27211e+07	2.2881e+07	2.2126e+07		0.0101153	-0.038293	0.0484083		0.0547336	0.172637	0.22753
High	P37805	63837; 103693564	ENSRNOG00000002151.7; ENSRNOG00000059539.1	Tagln3; LOC103693564	Transgelin-3 [OS=Rattus norvegicus]	0	54	8	936	7	1	199	22.5	4050.17	8	[GO:0000122]; GO:0006357; GO:0006366; GO:0045892; GO:0006355; GO:0006351; GO:0010629; GO:1903507; GO:2000113; GO:0010468; GO:1903506; GO:2000112; GO:0010467; GO:0034645; GO:0097659; GO:0010605; GO:1902679; GO:0010558; GO:0031327; GO:0060255; GO:2001141; GO:0010556; GO:0031326; GO:0043170; GO:0009059; GO:0044249; GO:0044260; GO:0032774; GO:0009892; GO:0051253; GO:0009890; GO:0031324; GO:0019222; G…	regulation of biological process	nucleus	protein binding		1		2.23977e+07	2.22477e+07	2.24214e+07	2.25241e+07		0.0112205	0.0178122	-0.00659165		0.113475	0.141753	0.0513952
High	O35814	192277	ENSRNOG00000021164.7	Stip1	stress-induced-phosphoprotein 1 [OS=Rattus norvegicus]	0	38	16	640	16	1	543	62.5	2830.83	16	[GO:0003723]; GO:0003676; GO:0097159; GO:1901363; GO:0005488; GO:0003674 [GO:0005515]; GO:0005488; GO:0003674 [GO:0005634]; GO:0043231; GO:0043227; GO:0043229; GO:0043226; GO:0044424; GO:0005575; GO:0005622; GO:0044464; GO:0005623 [GO:0005737]; GO:0044424; GO:0005622; GO:0044464; GO:0005575; GO:0005623 [GO:0008022]; GO:0005515; GO:0005488; GO:0003674 [GO:0008150] [GO:0030544]; GO:0031072; GO:0005…		cytoplasm;nucleus	protein binding;RNA binding	rno05020	0		2.23861e+07	2.23337e+07	2.22191e+07	2.26054e+07		-0.00742657	0.0174411	-0.0248677		0.0670164	0.153345	0.258935
High	Q9JKS6	56768		Pclo	Protein piccolo [OS=Rattus norvegicus]	0	26	68	1207	66	1	5085	552.4	5024.33	68	[GO:0001222]; GO:0001221; GO:0008134; GO:0005515; GO:0005488; GO:0003674 [GO:0005509]; GO:0046872; GO:0043169; GO:0043167; GO:0005488; GO:0003674 [GO:0005515]; GO:0005488; GO:0003674 [GO:0005522]; GO:0005515; GO:0005488; GO:0003674 [GO:0005544]; GO:0005543; GO:0008289; GO:0043168; GO:0005488; GO:0043167; GO:0003674 [GO:0005802]; GO:0098791; GO:0031984; GO:0044431; GO:0043227; GO:0044446; GO:00057…	cell organization and biogenesis;regulation of biological process;response to stimulus;transport	cytoskeleton	metal ion binding;protein binding	rno04911	0		2.20372e+07	2.19609e+07	2.31366e+07	2.10141e+07		0.0752405	-0.0635772	0.138818		1.2926	0.438916	1.29562
High	Q63610-2	117557		Tpm3	Isoform 2 of Tropomyosin alpha-3 chain [OS=Rattus norvegicus]	0	35	10	593	2	1	248	28.7	2508.02	10	[GO:0001725]; GO:0042641; GO:0097517; GO:0015629; GO:0044430; GO:0032432; GO:0005856; GO:0044446; GO:0043232; GO:0043229; GO:0044422; GO:0044424; GO:0043228; GO:0043226; GO:0005575; GO:0005622; GO:0044464; GO:0005623 [GO:0002102]; GO:0015629; GO:0043232; GO:0043234; GO:0044430; GO:0005856; GO:0043228; GO:0043229; GO:0032991; GO:0044446; GO:0043226; GO:0044424; GO:0005575; GO:0044422; GO:0005622; …	cell organization and biogenesis	cytoplasm;cytoskeleton;cytosol	protein binding;structural molecule activity	rno04261; rno05200; rno05216; rno05414; rno04260; rno05410	5		2.19109e+07	2.17318e+07	2.17738e+07	2.22272e+07		0.00278857	0.0325214	-0.0297329		0.0278141	0.361127	0.293314
High	B5DFN2	362013	ENSRNOG00000018569.7	Ahcyl1	S-adenosylhomocysteine hydrolase-like protein 1 [OS=Rattus norvegicus]	0	58	17	1185	17	1	483	53.7	5670.68	17	[GO:0003723]; GO:0003676; GO:0097159; GO:1901363; GO:0005488; GO:0003674 [GO:0004013]; GO:0016802; GO:0016801; GO:0016787; GO:0003824; GO:0003674 [GO:0005737]; GO:0044424; GO:0005622; GO:0044464; GO:0005575; GO:0005623 [GO:0005783]; GO:0012505; GO:0043231; GO:0044444; GO:0044464; GO:0043227; GO:0043229; GO:0005737; GO:0044424; GO:0005575; GO:0005623; GO:0043226; GO:0005622 [GO:0005829]; GO:004444…	metabolic process;regulation of biological process;response to stimulus;transport	cytoplasm;cytosol;endoplasmic reticulum;membrane	catalytic activity;nucleotide binding;protein binding;RNA binding	rno01100; rno00270	0		2.16111e+07	2.00087e+07	2.05843e+07	2.42403e+07		0.040919	0.27678	-0.235861		0.145765	0.926935	0.77372
High	P62909	140654	ENSRNOG00000017418.5	Rps3	40S ribosomal protein S3 [OS=Rattus norvegicus]	0.006	50	9	458	9	1	243	26.7	1787.66	9	[GO:0000977]; GO:0000976; GO:0001012; GO:0044212; GO:1990837; GO:0000975; GO:0003690; GO:0043565; GO:0001067; GO:0003677; GO:0003676; GO:0097159; GO:1901363; GO:0005488; GO:0003674 [GO:0002181]; GO:0006412; GO:0010467; GO:0034645; GO:0043043; GO:0044267; GO:0043170; GO:0009059; GO:0044249; GO:0044260; GO:0006518; GO:0043604; GO:1901566; GO:0019538; GO:0071704; GO:1901576; GO:0009058; GO:0044237; …	cell death;cell division;cell organization and biogenesis;metabolic process;regulation of biological process;response to stimulus	cytoplasm;cytoskeleton;cytosol;endoplasmic reticulum;membrane;mitochondrion;nucleus;organelle lumen;ribosome	catalytic activity;DNA binding;protein binding;RNA binding;structural molecule activity	rno03010	0		2.13814e+07	2.09431e+07	2.07023e+07	2.24987e+07		-0.0166821	0.103366	-0.120048		0.0711498	0.427981	0.520144
High	Q05764-1	24171		Add2	Beta-adducin [OS=Rattus norvegicus]	0	36	18	856	17	1	725	80.5	3738.54	18	[GO:0003779]; GO:0008092; GO:0005515; GO:0005488; GO:0003674 [GO:0005198]; GO:0003674 [GO:0005200]; GO:0005198; GO:0003674 [GO:0005516]; GO:0005515; GO:0005488; GO:0003674 [GO:0005737]; GO:0044424; GO:0005622; GO:0044464; GO:0005575; GO:0005623 [GO:0005856]; GO:0043232; GO:0043228; GO:0043229; GO:0043226; GO:0044424; GO:0005575; GO:0005622; GO:0044464; GO:0005623 [GO:0005886]; GO:0016020; GO:0044…	cell organization and biogenesis;cellular component movement;regulation of biological process;transport	cytoplasm;cytoskeleton;membrane	protein binding;structural molecule activity		0		2.13799e+07	2.09687e+07	2.19223e+07	2.12489e+07		0.0641604	0.0191506	0.0450099		0.66893	0.115252	0.359427
High	Q5M9I5	366448	ENSRNOG00000012550.6	Uqcrh	Cytochrome b-c1 complex subunit 6, mitochondrial [OS=Rattus norvegicus]	0.007	56	4	172	4	1	89	10.4	733.37	4	[GO:0005739]; GO:0043231; GO:0044444; GO:0043227; GO:0043229; GO:0005737; GO:0044424; GO:0043226; GO:0005622; GO:0044464; GO:0005575; GO:0005623 [GO:0005743]; GO:0019866; GO:0031966; GO:0031090; GO:0031967; GO:0044424; GO:0005740; GO:0044429; GO:0016020; GO:0043227; GO:0044422; GO:0031975; GO:0044446; GO:0005622; GO:0044464; GO:0005739; GO:0044444; GO:0005575; GO:0043226; GO:0043229; GO:0005623; …	cell organization and biogenesis;metabolic process;transport	membrane;mitochondrion	catalytic activity;protein binding;transporter activity	rno05010; rno00190; rno01100; rno05012; rno04932; rno04260; rno05016	0		2.13537e+07	2.15237e+07	2.29418e+07	1.95956e+07		0.0920525	-0.135393	0.227446		0.593157	0.651999	1.5061
High	Q1WIM3	360882	ENSRNOG00000003365.6	Cadm3	Cell adhesion molecule 3 [OS=Rattus norvegicus]	0	39	8	633	8	1	396	42.9	3238.97	8	[GO:0004872]; GO:0060089; GO:0003674 [GO:0005102]; GO:0005515; GO:0005488; GO:0003674 [GO:0005515]; GO:0005488; GO:0003674 [GO:0005886]; GO:0016020; GO:0044464; GO:0071944; GO:0005575; GO:0005623 [GO:0005887]; GO:0016021; GO:0031226; GO:0031224; GO:0044459; GO:0044425; GO:0005886; GO:0044464; GO:0005575; GO:0016020; GO:0071944; GO:0005623 [GO:0005911]; GO:0030054; GO:0005575 [GO:0005913]; GO:0005…		membrane	protein binding;receptor activity	rno04514	0		2.13522e+07	2.11927e+07	2.2234e+07	2.063e+07		0.0692007	-0.0388225	0.108023		0.373248	0.152378	0.625191
High	P62836	295347	ENSRNOG00000032463.4	Rap1a	ras-related protein Rap-1A [OS=Rattus norvegicus]	0	51	8	515	5	1	184	21	2298.68	8	[GO:0000166]; GO:0036094; GO:1901265; GO:0005488; GO:0097159; GO:1901363; GO:0003674 [GO:0000186]; GO:0032147; GO:0043406; GO:0045860; GO:0043405; GO:0043410; GO:0071902; GO:0001934; GO:0033674; GO:0045859; GO:0043408; GO:0071900; GO:0000165; GO:1902533; GO:0001932; GO:0006468; GO:0031401; GO:0042327; GO:0043549; GO:0051347; GO:1902531; GO:0023014; GO:0035556; GO:0009967; GO:0031399; GO:0042325; …	cell organization and biogenesis;cellular homeostasis;regulation of biological process;response to stimulus;transport	cytoplasm;cytosol;endosome;membrane	catalytic activity;nucleotide binding;protein binding;transporter activity	rno04010; rno04972; rno04722; rno04510; rno04015; rno04024; rno05211; rno04611; rno04014; rno04670; rno04062; rno04720	3		2.13092e+07	2.16504e+07	2.04049e+07	2.18722e+07		-0.0854791	0.0147027	-0.100182		0.47087	0.051901	0.506171
High	H1UBN0	361433	ENSRNOG00000015397.7	Cpne7	Copine-7 [OS=Rattus norvegicus]	0	52	16	703	15	1	556	61.9	3272.97	16	[GO:0005515]; GO:0005488; GO:0003674 [GO:0005634]; GO:0043231; GO:0043227; GO:0043229; GO:0043226; GO:0044424; GO:0005575; GO:0005622; GO:0044464; GO:0005623 [GO:0005737]; GO:0044424; GO:0005622; GO:0044464; GO:0005575; GO:0005623 [GO:0005886]; GO:0016020; GO:0044464; GO:0071944; GO:0005575; GO:0005623 [GO:0016020]; GO:0005575 [GO:0070062]; GO:0005615; GO:1903561; GO:0044421; GO:0031982; GO:00432…	response to stimulus	cytoplasm;membrane;nucleus	protein binding		1		2.12602e+07	2.16117e+07	2.327e+07	1.8899e+07		0.10666	-0.193503	0.300163		1.61045	1.97298	3.69222
High	P35571	25062		Gpd2	Glycerol-3-phosphate dehydrogenase, mitochondrial [OS=Rattus norvegicus]	0	52	24	691	24	1	727	80.9	2926.82	24	[GO:0004367]; GO:0016616; GO:0016614; GO:0016491; GO:0003824; GO:0003674 [GO:0004368]; GO:0016901; GO:0016614; GO:0016491; GO:0003824; GO:0003674 [GO:0005509]; GO:0046872; GO:0043169; GO:0043167; GO:0005488; GO:0003674 [GO:0005739]; GO:0043231; GO:0044444; GO:0043227; GO:0043229; GO:0005737; GO:0044424; GO:0043226; GO:0005622; GO:0044464; GO:0005575; GO:0005623 [GO:0005743]; GO:0019866; GO:003196…	metabolic process	membrane;mitochondrion	catalytic activity;metal ion binding	rno00564	0		2.11401e+07	2.10179e+07	2.2618e+07	1.97846e+07		0.105853	-0.0872406	0.193094		1.23276	0.499824	1.59957
High	P39069	24183		Ak1	Adenylate kinase isoenzyme 1 [OS=Rattus norvegicus]	0	47	8	771	8	1	194	21.6	3594.6	8	[GO:0000166]; GO:0036094; GO:1901265; GO:0005488; GO:0097159; GO:1901363; GO:0003674 [GO:0001520]; GO:0036126; GO:0044441; GO:0097223; GO:0099513; GO:0097729; GO:0005929; GO:0044422; GO:0120038; GO:0044464; GO:0044430; GO:0099512; GO:0031514; GO:0043226; GO:0120025; GO:0005575; GO:0044463; GO:0005623; GO:0005856; GO:0044446; GO:0099081; GO:0042995; GO:0043232; GO:0043229; GO:0044424; GO:0099080; …	cell differentiation;metabolic process;regulation of biological process;response to stimulus	cytoplasm;cytosol;membrane	catalytic activity;nucleotide binding	rno00230; rno01100; rno00730	0		2.10836e+07	2.1441e+07	2.10381e+07	2.07716e+07		-0.0273675	-0.0457599	0.0183925		0.146929	0.221596	0.0742663
High	P33124	117243	ENSRNOG00000026745.7	Acsl6	Long-chain-fatty-acid--CoA ligase 6 [OS=Rattus norvegicus]	0	53	22	729	2	1	697	78.1	3027.34	22	[GO:0000166]; GO:0036094; GO:1901265; GO:0005488; GO:0097159; GO:1901363; GO:0003674 [GO:0001666]; GO:0006950; GO:0036293; GO:0050896; GO:0070482; GO:0008150; GO:0009628 [GO:0001676]; GO:0006631; GO:0032787; GO:0044255; GO:0019752; GO:0006629; GO:0044237; GO:0043436; GO:0044238; GO:0071704; GO:0008152; GO:0009987; GO:0006082; GO:0008150; GO:0044281 [GO:0003824]; GO:0003674 [GO:0004467]; GO:001564…	cell proliferation;metabolic process;regulation of biological process;response to stimulus;transport	endoplasmic reticulum;membrane;mitochondrion;nucleus	catalytic activity;nucleotide binding;protein binding	rno01212; rno00071; rno00061; rno01100; rno03320; rno04146; rno04920	19		2.10776e+07	2.07783e+07	2.1446e+07	2.10086e+07		0.0456317	0.0159068	0.0297249		0.459897	0.0792581	0.170887
High	B2RYG6	293705	ENSRNOG00000021175.5	Otub1	Ubiquitin thioesterase otub1 [OS=Rattus norvegicus]	0	51	8	582	8	1	271	31.3	2535.75	8	[GO:0002250]; GO:0006955; GO:0002376; GO:0050896; GO:0008150 [GO:0002376]; GO:0008150 [GO:0003674] [GO:0004843]; GO:0036459; GO:0019783; GO:0101005; GO:0008234; GO:0016787; GO:0140096; GO:0070011; GO:0003824; GO:0008233; GO:0003674 [GO:0005634]; GO:0043231; GO:0043227; GO:0043229; GO:0043226; GO:0044424; GO:0005575; GO:0005622; GO:0044464; GO:0005623 [GO:0005737]; GO:0044424; GO:0005622; GO:00444…	metabolic process;regulation of biological process;response to stimulus	cytoplasm;nucleus	catalytic activity;protein binding		0		2.09646e+07	2.04997e+07	2.19088e+07	2.04852e+07		0.0959056	-0.00101895	0.0969246		0.545428	0.00373006	0.509076
High	Q5XIM9	299809	ENSRNOG00000021317.5	Cct2	T-complex protein 1 subunit beta [OS=Rattus norvegicus]	0	57	22	1331	22	1	535	57.4	6656.03	22	[GO:0000166]; GO:0036094; GO:1901265; GO:0005488; GO:0097159; GO:1901363; GO:0003674 [GO:0002199]; GO:0043234; GO:0032991; GO:0005575 [GO:0005524]; GO:0032559; GO:0035639; GO:0030554; GO:0032555; GO:0043168; GO:1901265; GO:0017076; GO:0032553; GO:0043167; GO:0097159; GO:1901363; GO:0000166; GO:0097367; GO:0005488; GO:0036094; GO:0003674 [GO:0005737]; GO:0044424; GO:0005622; GO:0044464; GO:0005575…	cell organization and biogenesis;metabolic process;regulation of biological process;transport	cytoplasm;cytosol	nucleotide binding;protein binding		0		2.08686e+07	2.09474e+07	2.10929e+07	2.05656e+07		0.009988	-0.0265367	0.0365247		0.114837	0.360927	0.488381
High	P15865	201097	ENSRNOG00000047459.1	Hist1h1d	Histone H1.4 [OS=Rattus norvegicus]	0.007	11	3	163	3	1	219	22	625.03	3	[GO:0000122]; GO:0006357; GO:0006366; GO:0045892; GO:0006355; GO:0006351; GO:0010629; GO:1903507; GO:2000113; GO:0010468; GO:1903506; GO:2000112; GO:0010467; GO:0034645; GO:0097659; GO:0010605; GO:1902679; GO:0010558; GO:0031327; GO:0060255; GO:2001141; GO:0010556; GO:0031326; GO:0043170; GO:0009059; GO:0044249; GO:0044260; GO:0032774; GO:0009892; GO:0051253; GO:0009890; GO:0031324; GO:0019222; G…	cell organization and biogenesis;metabolic process;regulation of biological process	chromosome;nucleus	DNA binding;metal ion binding;nucleotide binding;RNA binding		0		2.06834e+07	2.06893e+07	2.13618e+07	1.9999e+07		0.0461503	-0.0489567	0.095107		0.0738215	0.0711628	0.194656
High	P12785	50671	ENSRNOG00000045636.2	Fasn	Fatty acid synthase [OS=Rattus norvegicus]	0	34	45	1097	45	1	2505	272.5	4632.87	45	[GO:0001649]; GO:0001503; GO:0030154; GO:0032501; GO:0048869; GO:0008150; GO:0009987; GO:0032502 [GO:0003723]; GO:0003676; GO:0097159; GO:1901363; GO:0005488; GO:0003674 [GO:0003824]; GO:0003674 [GO:0004312]; GO:0016747; GO:0016746; GO:0016740; GO:0003824; GO:0003674 [GO:0004313]; GO:0004312; GO:0016418; GO:0016747; GO:0016407; GO:0016417; GO:0016746; GO:0016740; GO:0003824; GO:0003674 [GO:000431…	cell differentiation;metabolic process;response to stimulus	cytoplasm;cytosol;Golgi;membrane;mitochondrion	catalytic activity;nucleotide binding;protein binding;RNA binding	rno01212; rno00061; rno01100; rno04152; rno04910	0		2.05341e+07	2.01411e+07	2.0609e+07	2.08521e+07		0.0331364	0.0500529	-0.0169165		0.34438	0.497645	0.135158
High	O08651	58835	ENSRNOG00000019328.6	Phgdh	D-3-phosphoglycerate dehydrogenase [OS=Rattus norvegicus]	0	43	14	834	14	1	533	56.5	3658.68	14	[GO:0004617]; GO:0016616; GO:0016614; GO:0016491; GO:0003824; GO:0003674 [GO:0005575] [GO:0006541]; GO:0009064; GO:1901605; GO:0006520; GO:0019752; GO:0044238; GO:1901564; GO:0043436; GO:0008152; GO:0006807; GO:0071704; GO:0006082; GO:0008150; GO:0044237; GO:0044281; GO:0009987 [GO:0006544]; GO:0009069; GO:1901605; GO:0006520; GO:0019752; GO:0044238; GO:1901564; GO:0043436; GO:0008152; GO:0006807…	cell differentiation;cell organization and biogenesis;metabolic process;regulation of biological process		catalytic activity;nucleotide binding	rno01230; rno01100; rno00260; rno01200	0		2.03475e+07	2.08665e+07	1.99364e+07	2.02395e+07		-0.0657805	-0.0440159	-0.0217646		0.304947	0.180886	0.088835
High	O88767	117287	ENSRNOG00000018289.6	Park7	protein/nucleic acid deglycase DJ-1 [OS=Rattus norvegicus]	0	69	8	1209	8	1	189	20	5870.75	8	(content is truncated) [GO:0000785]; GO:0044427; GO:0005694; GO:0044446; GO:0043232; GO:0043229; GO:0044422; GO:0044424; GO:0043228; GO:0043226; GO:0005575; GO:0005622; GO:0044464; GO:0005623 [GO:0001933]; GO:0001932; GO:0006468; GO:0031400; GO:0042326; GO:0031399; GO:0042325; GO:0006464; GO:0016310; GO:0032269; GO:0045936; GO:0032268; GO:0019220; GO:0036211; GO:0044267; GO:0006796; GO:0031324; G…	cell communication;cell organization and biogenesis;defense response;metabolic process;regulation of biological process;response to stimulus;transport	chromosome;cytoplasm;cytosol;endoplasmic reticulum;membrane;mitochondrion;nucleus;organelle lumen	antioxidant activity;catalytic activity;DNA binding;enzyme regulator activity;metal ion binding;protein binding;RNA binding	rno05012	0		2.02743e+07	1.99868e+07	1.87128e+07	2.21235e+07		-0.0950231	0.146532	-0.241555		1.0106	1.1325	2.22115
High	Q01728-2	29715	ENSRNOG00000008479.8	Slc8a1	Isoform 2 of Sodium/calcium exchanger 1 [OS=Rattus norvegicus]	0	27	18	627	18	1	958	106.6	2761.39	18	[GO:0001666]; GO:0006950; GO:0036293; GO:0050896; GO:0070482; GO:0008150; GO:0009628 [GO:0001892]; GO:0001701; GO:0001890; GO:0003006; GO:0048568; GO:0043009; GO:0048513; GO:0048608; GO:0022414; GO:0032502; GO:0009790; GO:0009792; GO:0048731; GO:0048856; GO:0061458; GO:0000003; GO:0008150; GO:0007275; GO:0032501 [GO:0002026]; GO:0008016; GO:0065008; GO:0060047; GO:1903522; GO:0065007; GO:0003015;…	cell communication;cellular homeostasis;regulation of biological process;response to stimulus;transport	membrane;mitochondrion	metal ion binding;protein binding;transporter activity	rno04978; rno04020; rno04261; rno04961; rno04740; rno04974; rno05412; rno05414; rno04260; rno04022; rno05410	0		2.00115e+07	1.98977e+07	2.00746e+07	2.0062e+07		0.0127691	0.0118653	0.000903816		0.0800093	0.0524439	0.00415332
High	P12346-1	24825	ENSRNOG00000030625.6	Tf	Serotransferrin [OS=Rattus norvegicus]	0	37	16	752	16	1	698	76.3	3335.33	16	[GO:0001666]; GO:0006950; GO:0036293; GO:0050896; GO:0070482; GO:0008150; GO:0009628 [GO:0001895]; GO:0001894; GO:0048871; GO:0060249; GO:0032501; GO:0042592; GO:0008150; GO:0065008; GO:0065007 [GO:0005525]; GO:0032550; GO:0032561; GO:0035639; GO:0001883; GO:0032549; GO:0019001; GO:0032555; GO:0043168; GO:1901265; GO:0001882; GO:0017076; GO:0032553; GO:0043167; GO:0097159; GO:1901363; GO:0036094;…	cell death;cell differentiation;cell organization and biogenesis;cellular homeostasis;defense response;metabolic process;regulation of biological process;response to stimulus;transport	cell surface;endosome;extracellular;membrane	metal ion binding;nucleotide binding;protein binding;transporter activity	rno04978; rno04066	0		1.99774e+07	1.87739e+07	1.8483e+07	2.26752e+07		-0.0225268	0.272388	-0.294914		0.0990019	1.21815	1.28267
High	P21396	29253		Maoa	Amine oxidase [flavin-containing] A [OS=Rattus norvegicus]	0	40	13	858	13	1	526	59.5	3541.56	13	[GO:0005739]; GO:0043231; GO:0044444; GO:0043227; GO:0043229; GO:0005737; GO:0044424; GO:0043226; GO:0005622; GO:0044464; GO:0005575; GO:0005623 [GO:0005741]; GO:0031966; GO:0031968; GO:0005740; GO:0031090; GO:0044429; GO:0019867; GO:0031967; GO:0044424; GO:0098588; GO:0098805; GO:0016020; GO:0043227; GO:0044422; GO:0005739; GO:0044444; GO:0044446; GO:0031975; GO:0005622; GO:0044464; GO:0005575; …	metabolic process	membrane;mitochondrion	catalytic activity;nucleotide binding		0		1.99332e+07	1.94697e+07	2.10614e+07	1.92686e+07		0.11337	-0.0149775	0.128348		1.48564	0.0909043	1.74627
High	Q9EQX9	116725	ENSRNOG00000058053.1	Ube2n	ubiquitin-conjugating enzyme E2 N [OS=Rattus norvegicus]	0	49	4	508	4	1	152	17.1	2539.81	4	[GO:0000151]; GO:0044424; GO:1990234; GO:0005622; GO:0044464; GO:1902494; GO:0005575; GO:0005623; GO:0032991 [GO:0000166]; GO:0036094; GO:1901265; GO:0005488; GO:0097159; GO:1901363; GO:0003674 [GO:0000724]; GO:0000725; GO:0006302; GO:0006281; GO:0006310; GO:0006259; GO:0006974; GO:0044260; GO:0090304; GO:0033554; GO:0043170; GO:0044237; GO:0006139; GO:0006950; GO:0051716; GO:0071704; GO:0008152;…	cell organization and biogenesis;metabolic process;regulation of biological process;response to stimulus;transport	cytoplasm;nucleus	catalytic activity;nucleotide binding;protein binding;RNA binding	rno04120	0		1.98688e+07	1.95572e+07	2.08273e+07	1.92218e+07		0.0907784	-0.0249537	0.115732		0.744445	0.13118	1.16593
High	P59215	50664	ENSRNOG00000019482.7	Gnao1	Guanine nucleotide-binding protein G(O) subunit alpha [OS=Rattus norvegicus]	0	78	21	2821	5	1	354	40	13376.9	21	[GO:0000166]; GO:0036094; GO:1901265; GO:0005488; GO:0097159; GO:1901363; GO:0003674 [GO:0003924]; GO:0017111; GO:0016462; GO:0016818; GO:0016817; GO:0016787; GO:0003824; GO:0003674 [GO:0004871]; GO:0003674 [GO:0005515]; GO:0005488; GO:0003674 [GO:0005525]; GO:0032550; GO:0032561; GO:0035639; GO:0001883; GO:0032549; GO:0019001; GO:0032555; GO:0043168; GO:1901265; GO:0001882; GO:0017076; GO:003255…	cell organization and biogenesis;regulation of biological process;response to stimulus	membrane	catalytic activity;metal ion binding;nucleotide binding;protein binding;signal transducer activity	rno04921; rno05034; rno05142; rno05032; rno04723; rno04015; rno04724; rno04915; rno04725; rno05145; rno04730; rno04727; rno04916; rno04713; rno04726; rno04728	0		1.97828e+07	1.98627e+07	1.98187e+07	1.9667e+07		-0.00320168	-0.0142873	0.0110856		0.0222379	0.0919931	0.0833005
High	P55161	58823		Nckap1	Nck-associated protein 1 [OS=Rattus norvegicus]	0	33	24	879	24	1	1128	128.8	4058.28	24	[GO:0001701]; GO:0043009; GO:0009792; GO:0009790; GO:0007275; GO:0032501; GO:0048856; GO:0008150; GO:0032502 [GO:0001726]; GO:0031252; GO:0120025; GO:0044464; GO:0042995; GO:0005575; GO:0005623 [GO:0001756]; GO:0009952; GO:0035282; GO:0043009; GO:0048646; GO:0061053; GO:0003002; GO:0009792; GO:0009653; GO:0032502; GO:0009790; GO:0060429; GO:0007389; GO:0048856; GO:0008150; GO:0007275; GO:0009888;…	cell organization and biogenesis;cellular component movement;regulation of biological process;response to stimulus	membrane	protein binding	rno04810	0		1.97177e+07	1.98188e+07	1.98664e+07	1.94679e+07		0.00345889	-0.0257751	0.029234		0.0239038	0.141496	0.150752
High	P09527	29448	ENSRNOG00000012247.6	Rab7a	ras-related protein Rab-7a [OS=Rattus norvegicus]	0.006	50	9	342	9	1	207	23.5	1508.32	9	[GO:0000045]; GO:0070925; GO:1905037; GO:0006996; GO:0022607; GO:0007033; GO:0016236; GO:0016043; GO:0044085; GO:0006914; GO:0009987; GO:0071840; GO:0044248; GO:0061919; GO:0008150; GO:0009056; GO:0044237; GO:0008152 [GO:0000166]; GO:0036094; GO:1901265; GO:0005488; GO:0097159; GO:1901363; GO:0003674 [GO:0000421]; GO:0005774; GO:0005776; GO:0044437; GO:0098588; GO:0098805; GO:0005773; GO:0044444;…	cell organization and biogenesis;cellular homeostasis;metabolic process;regulation of biological process;response to stimulus;transport	cytoplasm;cytosol;endosome;Golgi;membrane;vacuole	catalytic activity;nucleotide binding;protein binding	rno05146; rno05152; rno04144; rno05132; rno04145	0		1.96751e+07	1.95841e+07	1.93631e+07	2.00782e+07		-0.016371	0.0359504	-0.0523215		0.115846	0.237943	0.406401
Medium	P20760	679045		LOC679045	Ig gamma-2A chain C region [OS=Rattus norvegicus]	0.042	19	4	21	4	1	322	35.2	81.26	4	[GO:0003823]; GO:0005488; GO:0003674 [GO:0006910]; GO:0006909; GO:0008037; GO:0006897; GO:0009987; GO:0016192; GO:0098657; GO:0008150; GO:0006810; GO:0051234; GO:0051179 [GO:0006911]; GO:0006909; GO:0099024; GO:0006897; GO:0010324; GO:0016192; GO:0098657; GO:0061024; GO:0006810; GO:0016043; GO:0051234; GO:0009987; GO:0071840; GO:0051179; GO:0008150 [GO:0006958]; GO:0002455; GO:0006956; GO:0006959…	cell organization and biogenesis;defense response;metabolic process;regulation of biological process;response to stimulus		protein binding		0		1.95516e+07	2.0092e+07	1.8657e+07	1.99058e+07		-0.106902	-0.0134339	-0.0934684		0.655732	0.0467587	0.466192
High	P02650	25728	ENSRNOG00000018454.7	Apoe	Apolipoprotein E [OS=Rattus norvegicus]	0	38	10	775	10	1	312	35.7	3447.92	10	[GO:0001540]; GO:0042277; GO:0033218; GO:0005488; GO:0003674 [GO:0001937]; GO:0001935; GO:0001936; GO:0050680; GO:0050673; GO:0050678; GO:0008285; GO:0008283; GO:0042127; GO:0048523; GO:0008150; GO:0050794; GO:0009987; GO:0048519; GO:0050789; GO:0065007 [GO:0002021]; GO:0031667; GO:0032501; GO:0009991; GO:0008150; GO:0009605; GO:0050896 [GO:0005102]; GO:0005515; GO:0005488; GO:0003674 [GO:0005319…	cell differentiation;cell organization and biogenesis;cellular homeostasis;metabolic process;regulation of biological process;response to stimulus;transport	cell surface;cytoplasm;endoplasmic reticulum;endosome;extracellular;Golgi;membrane;nucleus;vacuole	antioxidant activity;catalytic activity;enzyme regulator activity;metal ion binding;protein binding;transporter activity	rno05010	0		1.93689e+07	1.97978e+07	1.92454e+07	1.90635e+07		-0.0408251	-0.0545287	0.0137037		0.168577	0.234787	0.0467133
High	Q8VBU2-2	171114		Ndrg2	Isoform 2 of Protein NDRG2 [OS=Rattus norvegicus]	0	63	11	1224	11	1	357	39.2	6010.69	11	[GO:0001818]; GO:0001816; GO:0001817; GO:0051241; GO:0032501; GO:0051239; GO:0048519; GO:0008150; GO:0050789; GO:0065007 [GO:0005634]; GO:0043231; GO:0043227; GO:0043229; GO:0043226; GO:0044424; GO:0005575; GO:0005622; GO:0044464; GO:0005623 [GO:0005737]; GO:0044424; GO:0005622; GO:0044464; GO:0005575; GO:0005623 [GO:0005794]; GO:0012505; GO:0043231; GO:0044444; GO:0044464; GO:0043227; GO:0043229…	cell differentiation;regulation of biological process;response to stimulus	cytoplasm;Golgi;nucleus			0		1.90541e+07	1.93991e+07	1.80995e+07	1.96637e+07		-0.100036	0.0195476	-0.119583		0.569849	0.0809096	0.968654
High	P07722-1	29409	ENSRNOG00000021023.7	Mag	Myelin-associated glycoprotein [OS=Rattus norvegicus]	0	21	8	497	8	1	626	69.3	2004.79	8	[GO:0005102]; GO:0005515; GO:0005488; GO:0003674 [GO:0005515]; GO:0005488; GO:0003674 [GO:0005737]; GO:0044424; GO:0005622; GO:0044464; GO:0005575; GO:0005623 [GO:0005886]; GO:0016020; GO:0044464; GO:0071944; GO:0005575; GO:0005623 [GO:0005887]; GO:0016021; GO:0031226; GO:0031224; GO:0044459; GO:0044425; GO:0005886; GO:0044464; GO:0005575; GO:0016020; GO:0071944; GO:0005623 [GO:0007155]; GO:00226…	regulation of biological process;response to stimulus	cytoplasm;membrane	protein binding	rno04514	0		1.89439e+07	2.09877e+07	1.7449e+07	1.83949e+07		-0.266401	-0.190242	-0.0761581		0.514031	0.266168	0.104083
High	1				1	0	59	29	569	27	1	607	69.2	2444.48	29						1		1.88393e+07	2.2659e+07	1.62676e+07	1.75913e+07		-0.47808	-0.365223	-0.112857		0.283913	0.200371	0.108392
High	P23978	79212	ENSRNOG00000006527.6	Slc6a1	Sodium- and chloride-dependent GABA transporter 1 [OS=Rattus norvegicus]	0.005	21	5	299	5	1	599	67	1301.67	5	[GO:0005328]; GO:0005326; GO:0015370; GO:0005215; GO:0015081; GO:0015294; GO:0003674; GO:0015077; GO:0046873; GO:0008324; GO:0015293; GO:0022890; GO:0015075; GO:0015291; GO:0022891; GO:0022804; GO:0022857; GO:0022892 [GO:0005332]; GO:0005283; GO:0015185; GO:0015296; GO:0005343; GO:0005416; GO:0008028; GO:0015171; GO:0008509; GO:0015294; GO:0022853; GO:0005342; GO:0015370; GO:0046943; GO:0015075; …	cell organization and biogenesis;regulation of biological process;response to stimulus;transport	cell surface;membrane	metal ion binding;protein binding;transporter activity	rno04727	0		1.8685e+07	1.84575e+07	1.89824e+07	1.86152e+07		0.0404543	0.0122725	0.0281818		0.26636	0.0532472	0.132968
High	Q5M7W5-1	367171	ENSRNOG00000020748.7	Map4	Microtubule-associated protein 4 [OS=Rattus norvegicus]	0.006	39	21	443	21	1	1057	110.2	1743.21	21	[GO:0000226]; GO:0007010; GO:0007017; GO:0006996; GO:0009987; GO:0016043; GO:0008150; GO:0071840 [GO:0003723]; GO:0003676; GO:0097159; GO:1901363; GO:0005488; GO:0003674 [GO:0005737]; GO:0044424; GO:0005622; GO:0044464; GO:0005575; GO:0005623 [GO:0005856]; GO:0043232; GO:0043228; GO:0043229; GO:0043226; GO:0044424; GO:0005575; GO:0005622; GO:0044464; GO:0005623 [GO:0005874]; GO:0015630; GO:009951…	cell division;cell organization and biogenesis;cellular component movement;regulation of biological process	cytoplasm;cytoskeleton	protein binding;RNA binding		0		1.86721e+07	1.82042e+07	1.95166e+07	1.82955e+07		0.100431	0.00721745	0.0932138		0.83932	0.0323037	0.559061
High	Q01062	81743		Pde2a	cGMP-dependent 3',5'-cyclic phosphodiesterase [OS=Rattus norvegicus]	0	54	28	1163	28	1	928	104.6	5471.16	28	[GO:0000122]; GO:0006357; GO:0006366; GO:0045892; GO:0006355; GO:0006351; GO:0010629; GO:1903507; GO:2000113; GO:0010468; GO:1903506; GO:2000112; GO:0010467; GO:0034645; GO:0097659; GO:0010605; GO:1902679; GO:0010558; GO:0031327; GO:0060255; GO:2001141; GO:0010556; GO:0031326; GO:0043170; GO:0009059; GO:0044249; GO:0044260; GO:0032774; GO:0009892; GO:0051253; GO:0009890; GO:0031324; GO:0019222; G…	cell differentiation;metabolic process;regulation of biological process;response to stimulus;transport	cytoplasm;cytosol;endoplasmic reticulum;Golgi;membrane;mitochondrion;nucleus;organelle lumen	catalytic activity;metal ion binding;nucleotide binding;protein binding	rno00230; rno05032; rno04740; rno04925; rno04022	0		1.86298e+07	1.84391e+07	1.87801e+07	1.86702e+07		0.026442	0.0179703	0.00847167		0.252484	0.0889791	0.0418738
High	P03994-1	29331	ENSRNOG00000032002.5	Hapln1	Hyaluronan and proteoglycan link protein 1 [OS=Rattus norvegicus]	0	42	9	847	9	1	354	40.2	4162.4	9	[GO:0001501]; GO:0048731; GO:0007275; GO:0048856; GO:0032501; GO:0032502; GO:0008150 [GO:0005198]; GO:0003674 [GO:0005201]; GO:0005198; GO:0003674 [GO:0005540]; GO:0005539; GO:0031406; GO:0097367; GO:0043168; GO:0043177; GO:0005488; GO:0043167; GO:0036094; GO:0003674 [GO:0005576]; GO:0005575 [GO:0005578]; GO:0031012; GO:0044421; GO:0005575; GO:0005576 [GO:0007155]; GO:0022610; GO:0008150 [GO:0007…		extracellular	structural molecule activity		0		1.85972e+07	1.84242e+07	1.84688e+07	1.88987e+07		0.00348796	0.0366825	-0.0331945		0.0131842	0.123682	0.137235
High	Q568Z9	290356; 103690056; 108348161	ENSRNOG00000049071.2; ENSRNOG00000010555.4	Phyhip; LOC102551958; NEWGENE_1305790; LOC108348161	phytanoyl-CoA hydroxylase-interacting protein [OS=Rattus norvegicus]	0	40	8	635	8	1	330	37.5	2585.8	8	[GO:0005515]; GO:0005488; GO:0003674			protein binding		0		1.8565e+07	1.82518e+07	1.92984e+07	1.81447e+07		0.0804386	-0.00849369	0.0889323		0.833187	0.0353596	0.527205
High	P19643	25750	ENSRNOG00000029778.5	Maob	Amine oxidase [flavin-containing] B [OS=Rattus norvegicus]	0	49	14	727	14	1	520	58.4	3176.78	14	[GO:0005739]; GO:0043231; GO:0044444; GO:0043227; GO:0043229; GO:0005737; GO:0044424; GO:0043226; GO:0005622; GO:0044464; GO:0005575; GO:0005623 [GO:0005741]; GO:0031966; GO:0031968; GO:0005740; GO:0031090; GO:0044429; GO:0019867; GO:0031967; GO:0044424; GO:0098588; GO:0098805; GO:0016020; GO:0043227; GO:0044422; GO:0005739; GO:0044444; GO:0044446; GO:0031975; GO:0005622; GO:0044464; GO:0005575; …	metabolic process;regulation of biological process;response to stimulus	membrane;mitochondrion	catalytic activity;nucleotide binding;protein binding	rno05034; rno00350; rno00330; rno05030; rno00340; rno00380; rno01100; rno00260; rno00982; rno00360; rno05031; rno04726; rno04728	0		1.8558e+07	1.87161e+07	1.91706e+07	1.77872e+07		0.0346185	-0.0734393	0.108058		0.339446	0.663586	1.18054
High	P21670	29671	ENSRNOG00000013493.6	Psma4	Proteasome subunit alpha type-4 [OS=Rattus norvegicus]	0.006	40	5	177	5	1	261	29.5	771.35	5	[GO:0000502]; GO:0043234; GO:0044424; GO:1905369; GO:0032991; GO:0005622; GO:0044464; GO:1905368; GO:0005575; GO:0005623; GO:1902494 [GO:0000932]; GO:0036464; GO:0035770; GO:0044444; GO:0030529; GO:0043232; GO:0005737; GO:0044424; GO:1990904; GO:0043228; GO:0043229; GO:0005622; GO:0044464; GO:0032991; GO:0043226; GO:0005575; GO:0005623 [GO:0004175]; GO:0070011; GO:0008233; GO:0016787; GO:0140096;…	metabolic process	cytoplasm;cytosol;nucleus;proteasome	catalytic activity	rno03050	0		1.84802e+07	1.85218e+07	1.96677e+07	1.72509e+07		0.0866049	-0.102553	0.189158		0.926206	0.831614	2.29791
High	Q8K4Y5	252892	ENSRNOG00000014758.7	Lgi1	Leucine-rich glioma-inactivated protein 1 [OS=Rattus norvegicus]	0	25	9	617	9	1	557	63.7	2497	9	[GO:0005102]; GO:0005515; GO:0005488; GO:0003674 [GO:0005515]; GO:0005488; GO:0003674 [GO:0005576]; GO:0005575 [GO:0005615]; GO:0044421; GO:0005575; GO:0005576 [GO:0007411]; GO:0007409; GO:0097485; GO:0048667; GO:0048812; GO:0061564; GO:0006928; GO:0006935; GO:0000904; GO:0048666; GO:0031175; GO:0120039; GO:0009987; GO:0042221; GO:0042330; GO:0000902; GO:0048468; GO:0030182; GO:0120036; GO:004885…	cell organization and biogenesis;cellular component movement;regulation of biological process	extracellular	protein binding		0		1.84161e+07	1.82907e+07	1.88196e+07	1.8138e+07		0.0411271	-0.0120997	0.0532268		0.462648	0.0772156	0.48285
High	P62824	171058	ENSRNOG00000011623.6	Rab3c	ras-related protein Rab-3C [OS=Rattus norvegicus]	0	51	9	489	7	1	227	25.9	2153.2	9	[GO:0000166]; GO:0036094; GO:1901265; GO:0005488; GO:0097159; GO:1901363; GO:0003674 [GO:0003924]; GO:0017111; GO:0016462; GO:0016818; GO:0016817; GO:0016787; GO:0003824; GO:0003674 [GO:0005525]; GO:0032550; GO:0032561; GO:0035639; GO:0001883; GO:0032549; GO:0019001; GO:0032555; GO:0043168; GO:1901265; GO:0001882; GO:0017076; GO:0032553; GO:0043167; GO:0097159; GO:1901363; GO:0036094; GO:0097367;…	regulation of biological process;response to stimulus;transport	cytosol;membrane	catalytic activity;nucleotide binding;protein binding		1		1.8337e+07	1.78655e+07	1.78149e+07	1.93306e+07		-0.00409278	0.113707	-0.117799		0.0190189	0.594752	0.727585
High	P02401	140662; 100911575	ENSRNOG00000002116.6; ENSRNOG00000037607.2	Rplp2; LOC100911575	60S acidic ribosomal protein P2 [OS=Rattus norvegicus]	0	69	6	515	6	1	115	11.7	2674.07	6	[GO:0002181]; GO:0006412; GO:0010467; GO:0034645; GO:0043043; GO:0044267; GO:0043170; GO:0009059; GO:0044249; GO:0044260; GO:0006518; GO:0043604; GO:1901566; GO:0019538; GO:0071704; GO:1901576; GO:0009058; GO:0044237; GO:0043603; GO:1901564; GO:0044271; GO:0044238; GO:0008152; GO:0009987; GO:0034641; GO:0006807; GO:0008150 [GO:0003735]; GO:0005198; GO:0003674 [GO:0005506]; GO:0046914; GO:0046872;…	metabolic process;regulation of biological process;response to stimulus	membrane;ribosome	metal ion binding;structural molecule activity	rno03010	0		1.82928e+07	1.82022e+07	1.78243e+07	1.88518e+07		-0.0302722	0.0505841	-0.0808563		0.166245	0.216179	0.443544
High	P58775-2	500450	ENSRNOG00000016731.8	Tpm2	Isoform 2 of Tropomyosin beta chain [OS=Rattus norvegicus]	0.004	41	13	195	6	1	284	32.9	808.03	13	[GO:0003779]; GO:0008092; GO:0005515; GO:0005488; GO:0003674 [GO:0005862]; GO:0005865; GO:0044430; GO:0044449; GO:0015629; GO:0030017; GO:0036379; GO:0005856; GO:0044446; GO:0043292; GO:0044422; GO:0044444; GO:0030016; GO:0043232; GO:0043229; GO:0044424; GO:0099512; GO:0005575; GO:0043226; GO:0005737; GO:0043228; GO:0005622; GO:0044464; GO:0099081; GO:0005623; GO:0099080 [GO:0005884]; GO:0015629;…	cell organization and biogenesis;regulation of biological process	cytoskeleton	protein binding;structural molecule activity	rno04261; rno05414; rno04260; rno05410	7		1.82032e+07	2.37644e+07	1.57367e+07	1.51086e+07		-0.59467	-0.653428	0.058758		0.45242	0.498865	0.689279
High	Q63622-7	64053		Dlg2	Isoform 7 of Disks large homolog 2 [OS=Rattus norvegicus]	0	34	19	1160	17	1	870	97.4	5346.41	19	[GO:0004385]; GO:0016776; GO:0019201; GO:0016772; GO:0019205; GO:0016740; GO:0016301; GO:0003824; GO:0003674 [GO:0005515]; GO:0005488; GO:0003674 [GO:0005737]; GO:0044424; GO:0005622; GO:0044464; GO:0005575; GO:0005623 [GO:0007268]; GO:0098916; GO:0099537; GO:0099536; GO:0007267; GO:0007154; GO:0023052; GO:0009987; GO:0008150 [GO:0008022]; GO:0005515; GO:0005488; GO:0003674 [GO:0008076]; GO:00058…	cell communication;cell organization and biogenesis;metabolic process;regulation of biological process	cytoplasm;membrane	catalytic activity;protein binding		0		1.81667e+07	1.80903e+07	1.91655e+07	1.72442e+07		0.0832955	-0.0691028	0.152398		0.786851	0.377569	1.34605
High	Q6GMN2-1	117542	ENSRNOG00000004049.7	Baiap2	Brain-specific angiogenesis inhibitor 1-associated protein 2 [OS=Rattus norvegicus]	0	38	15	475	15	1	535	59.1	1943.2	15	[GO:0001221]; GO:0008134; GO:0005515; GO:0005488; GO:0003674 [GO:0001726]; GO:0031252; GO:0120025; GO:0044464; GO:0042995; GO:0005575; GO:0005623 [GO:0005515]; GO:0005488; GO:0003674 [GO:0005737]; GO:0044424; GO:0005622; GO:0044464; GO:0005575; GO:0005623 [GO:0005791]; GO:0005783; GO:0012505; GO:0043231; GO:0044444; GO:0044464; GO:0043227; GO:0043229; GO:0005737; GO:0044424; GO:0005575; GO:000562…	cell differentiation;cell organization and biogenesis;regulation of biological process;response to stimulus	cytoplasm;cytoskeleton;cytosol;endoplasmic reticulum;Golgi;membrane	protein binding	rno04520; rno04810	0		1.81166e+07	1.83694e+07	1.93775e+07	1.6603e+07		0.0770789	-0.145863	0.222942		0.407673	0.493819	0.917644
High	P51650-1	291133		Aldh5a1	Succinate-semialdehyde dehydrogenase, mitochondrial [OS=Rattus norvegicus]	0	44	17	713	17	1	523	56.1	3287.4	17	[GO:0004777]; GO:0016620; GO:0016903; GO:0016491; GO:0003824; GO:0003674 [GO:0005739]; GO:0043231; GO:0044444; GO:0043227; GO:0043229; GO:0005737; GO:0044424; GO:0043226; GO:0005622; GO:0044464; GO:0005575; GO:0005623 [GO:0006006]; GO:0019318; GO:0005996; GO:0005975; GO:0044281; GO:0044238; GO:0071704; GO:0008152; GO:0008150 [GO:0006083]; GO:0032787; GO:0019752; GO:0043436; GO:0006082; GO:0044237…	cell organization and biogenesis;metabolic process	mitochondrion	catalytic activity;nucleotide binding		0		1.81046e+07	1.7927e+07	1.76326e+07	1.87541e+07		-0.0238937	0.0650684	-0.0889621		0.170757	0.516626	0.859669
High	P62963	64303	ENSRNOG00000003975.6	Pfn1	profilin-1 [OS=Rattus norvegicus]	0	50	5	504	5	1	140	14.9	2252.8	5	[GO:0000774]; GO:0030554; GO:0060590; GO:0017076; GO:0060589; GO:0000166; GO:0030234; GO:0036094; GO:1901265; GO:0098772; GO:0005488; GO:0097159; GO:1901363; GO:0003674 [GO:0001843]; GO:0014020; GO:0060606; GO:0001838; GO:0001841; GO:0035148; GO:0016331; GO:0072175; GO:0021915; GO:0035239; GO:0048646; GO:0002009; GO:0048598; GO:0060562; GO:0007399; GO:0035295; GO:0043009; GO:0060429; GO:0009653; …	cell organization and biogenesis;regulation of biological process;response to stimulus	cytoplasm;cytoskeleton;membrane;nucleus	enzyme regulator activity;nucleotide binding;protein binding;RNA binding	rno04015; rno04810; rno05132	0		1.80224e+07	1.75455e+07	1.72047e+07	1.9317e+07		-0.0282961	0.138766	-0.167062		0.224643	0.771557	1.01708
High	Q8R491	192249	ENSRNOG00000007744.4	Ehd3	EH domain-containing protein 3 [OS=Rattus norvegicus]	0	68	23	1054	14	1	535	60.8	5097.25	23	[GO:0000166]; GO:0036094; GO:1901265; GO:0005488; GO:0097159; GO:1901363; GO:0003674 [GO:0001881]; GO:0023051; GO:0043112; GO:0023052; GO:0050789; GO:0044260; GO:0008150; GO:0065007; GO:0043170; GO:0044237; GO:0071704; GO:0008152; GO:0009987 [GO:0005509]; GO:0046872; GO:0043169; GO:0043167; GO:0005488; GO:0003674 [GO:0005515]; GO:0005488; GO:0003674 [GO:0005524]; GO:0032559; GO:0035639; GO:003055…	cell organization and biogenesis;metabolic process;regulation of biological process;transport	cytoplasm;cytosol;endosome;membrane	metal ion binding;nucleotide binding;protein binding	rno04144	8		1.8006e+07	1.83246e+07	1.86343e+07	1.70593e+07		0.0241829	-0.103224	0.127407		0.234139	1.07243	1.34044
High	P13086	114597		Suclg1	Succinate--CoA ligase [ADP/GDP-forming] subunit alpha, mitochondrial [OS=Rattus norvegicus]	0	64	11	773	11	1	346	36.1	3356.69	11	[GO:0000166]; GO:0036094; GO:1901265; GO:0005488; GO:0097159; GO:1901363; GO:0003674 [GO:0003723]; GO:0003676; GO:0097159; GO:1901363; GO:0005488; GO:0003674 [GO:0003824]; GO:0003674 [GO:0004775]; GO:0004774; GO:0016405; GO:0016878; GO:0016877; GO:0016874; GO:0003824; GO:0003674 [GO:0004776]; GO:0004774; GO:0016405; GO:0016878; GO:0016877; GO:0016874; GO:0003824; GO:0003674 [GO:0005739]; GO:00432…	metabolic process	cytosol;membrane;mitochondrion	catalytic activity;nucleotide binding;protein binding;RNA binding	rno00020; rno01100; rno00640; rno01200	0		1.78975e+07	1.78607e+07	1.83967e+07	1.74352e+07		0.0426587	-0.0347841	0.0774427		0.533393	0.341517	1.42588
High	P50399	29662	ENSRNOG00000018091.6	Gdi2	Rab GDP dissociation inhibitor beta [OS=Rattus norvegicus]	0	52	19	1275	15	1	445	50.5	6160.81	19	[GO:0003723]; GO:0003676; GO:0097159; GO:1901363; GO:0005488; GO:0003674 [GO:0005092]; GO:0030695; GO:0060589; GO:0030234; GO:0098772; GO:0003674 [GO:0005093]; GO:0005092; GO:0030695; GO:0060589; GO:0030234; GO:0098772; GO:0003674 [GO:0005096]; GO:0008047; GO:0030695; GO:0030234; GO:0060589; GO:0098772; GO:0003674 [GO:0005737]; GO:0044424; GO:0005622; GO:0044464; GO:0005575; GO:0005623 [GO:000579…	metabolic process;regulation of biological process;response to stimulus;transport	cytoplasm;cytosol;Golgi;membrane	catalytic activity;enzyme regulator activity;protein binding;RNA binding		0		1.78293e+07	1.75041e+07	1.66911e+07	1.92927e+07		-0.0686102	0.140364	-0.208974		0.55434	0.911084	1.75187
High	Q63666-4	25624		Vamp1	Isoform 4 of Vesicle-associated membrane protein 1 [OS=Rattus norvegicus]	0.005	47	4	244	4	1	130	13.9	1234.29	4	[GO:0005484]; GO:0005515; GO:0005488; GO:0003674 [GO:0005515]; GO:0005488; GO:0003674 [GO:0005741]; GO:0031966; GO:0031968; GO:0005740; GO:0031090; GO:0044429; GO:0019867; GO:0031967; GO:0044424; GO:0098588; GO:0098805; GO:0016020; GO:0043227; GO:0044422; GO:0005739; GO:0044444; GO:0044446; GO:0031975; GO:0005622; GO:0044464; GO:0005575; GO:0043226; GO:0043231; GO:0005737; GO:0043229; GO:0005623 …	cell organization and biogenesis;transport	cell surface;cytosol;membrane	protein binding		0		1.77175e+07	1.73686e+07	1.67028e+07	1.9081e+07		-0.0563904	0.135657	-0.192048		0.317334	0.635438	1.00149
High	P56571	294326	ENSRNOG00000001211.4	RGD1303003	ES1 protein homolog, mitochondrial [OS=Rattus norvegicus]	0.006	41	8	352	8	1	266	28.2	1608.3	8	[GO:0003674] [GO:0005575] [GO:0005739]; GO:0043231; GO:0044444; GO:0043227; GO:0043229; GO:0005737; GO:0044424; GO:0043226; GO:0005622; GO:0044464; GO:0005575; GO:0005623 [GO:0008150]		mitochondrion			0		1.76987e+07	1.77629e+07	1.76713e+07	1.76618e+07		-0.00745436	-0.00823359	0.00077923		0.0834131	0.0637896	0.00545712
High	P11232	116484		Txn1	thioredoxin [OS=Rattus norvegicus]	0.006	47	4	344	4	1	105	11.7	1475.22	4	[GO:0000122]; GO:0006357; GO:0006366; GO:0045892; GO:0006355; GO:0006351; GO:0010629; GO:1903507; GO:2000113; GO:0010468; GO:1903506; GO:2000112; GO:0010467; GO:0034645; GO:0097659; GO:0010605; GO:1902679; GO:0010558; GO:0031327; GO:0060255; GO:2001141; GO:0010556; GO:0031326; GO:0043170; GO:0009059; GO:0044249; GO:0044260; GO:0032774; GO:0009892; GO:0051253; GO:0009890; GO:0031324; GO:0019222; G…	cellular homeostasis;metabolic process;regulation of biological process;response to stimulus;transport	cytoplasm;cytosol;extracellular;mitochondrion;nucleus	antioxidant activity;catalytic activity;protein binding;RNA binding	rno04621	0		1.7627e+07	1.76623e+07	1.73003e+07	1.79186e+07		-0.029875	0.0207851	-0.0506601		0.206759	0.107299	0.309625
High	P19627	25740	ENSRNOG00000001313.4	Gnaz	guanine nucleotide-binding protein G(z) subunit alpha [OS=Rattus norvegicus]	0	48	12	452	12	1	355	40.9	1873.22	12	[GO:0000166]; GO:0036094; GO:1901265; GO:0005488; GO:0097159; GO:1901363; GO:0003674 [GO:0003924]; GO:0017111; GO:0016462; GO:0016818; GO:0016817; GO:0016787; GO:0003824; GO:0003674 [GO:0004871]; GO:0003674 [GO:0005525]; GO:0032550; GO:0032561; GO:0035639; GO:0001883; GO:0032549; GO:0019001; GO:0032555; GO:0043168; GO:1901265; GO:0001882; GO:0017076; GO:0032553; GO:0043167; GO:0097159; GO:1901363…	regulation of biological process;response to stimulus	cytosol;membrane	catalytic activity;metal ion binding;nucleotide binding;protein binding;signal transducer activity	rno04730	0		1.75675e+07	1.75636e+07	1.77503e+07	1.73885e+07		0.0152504	-0.0144605	0.0297109		0.168332	0.108698	0.276567
High	P85845	683788		Fscn1; LOC683788	Fascin [OS=Rattus norvegicus]	0	48	16	816	16	1	493	54.5	3904.24	16	[GO:0001725]; GO:0042641; GO:0097517; GO:0015629; GO:0044430; GO:0032432; GO:0005856; GO:0044446; GO:0043232; GO:0043229; GO:0044422; GO:0044424; GO:0043228; GO:0043226; GO:0005575; GO:0005622; GO:0044464; GO:0005623 [GO:0001726]; GO:0031252; GO:0120025; GO:0044464; GO:0042995; GO:0005575; GO:0005623 [GO:0001889]; GO:0048732; GO:0061008; GO:0048513; GO:0048731; GO:0048856; GO:0007275; GO:0032502;…	cell communication;cell organization and biogenesis;cellular component movement;regulation of biological process;response to stimulus	cytoplasm;cytoskeleton;cytosol;membrane	protein binding;RNA binding		0		1.73067e+07	1.67861e+07	1.60892e+07	1.90448e+07		-0.061178	0.182131	-0.243309		0.408517	1.5288	2.54674
High	P55067	58982		Ncan	Neurocan core protein [OS=Rattus norvegicus]	0	15	12	560	12	1	1257	135.5	2658.07	12	[GO:0001501]; GO:0048731; GO:0007275; GO:0048856; GO:0032501; GO:0032502; GO:0008150 [GO:0005201]; GO:0005198; GO:0003674 [GO:0005509]; GO:0046872; GO:0043169; GO:0043167; GO:0005488; GO:0003674 [GO:0005515]; GO:0005488; GO:0003674 [GO:0005540]; GO:0005539; GO:0031406; GO:0097367; GO:0043168; GO:0043177; GO:0005488; GO:0043167; GO:0036094; GO:0003674 [GO:0005576]; GO:0005575 [GO:0005578]; GO:0031…	regulation of biological process	extracellular;membrane	metal ion binding;protein binding;structural molecule activity		0		1.72689e+07	1.74149e+07	1.77917e+07	1.66002e+07		0.0308843	-0.069122	0.100006		0.199404	0.346476	0.694347
High	D3ZAF6	690441	ENSRNOG00000027049.6	Atp5j2	ATP synthase subunit f, mitochondrial [OS=Rattus norvegicus]	0.009	26	2	71	2	1	88	10.4	280.55	2	[GO:0000276]; GO:0005753; GO:0045263; GO:0098800; GO:0045259; GO:0033177; GO:0044424; GO:0005743; GO:0044455; GO:0098796; GO:0098798; GO:0016469; GO:0005622; GO:0044464; GO:0019866; GO:0031966; GO:0044425; GO:0044429; GO:0043234; GO:0005575; GO:0005623; GO:0031090; GO:0031967; GO:0005740; GO:0016020; GO:0005739; GO:0044444; GO:0044446; GO:0032991; GO:0043227; GO:0044422; GO:0031975; GO:0043231; G…	metabolic process;transport	membrane;mitochondrion;nucleus	catalytic activity	rno00190; rno01100	0		1.71701e+07	1.71547e+07	1.84652e+07	1.58904e+07		0.106211	-0.110445	0.216655		0.686043	0.499145	1.41065
High	Q62876	29205	ENSRNOG00000017108.7	Syngr1	Synaptogyrin-1 [OS=Rattus norvegicus]	0.005	30	4	321	4	1	234	25.7	1175.17	4	[GO:0006605]; GO:0006886; GO:0015031; GO:0034613; GO:0046907; GO:0015833; GO:0045184; GO:0008104; GO:0070727; GO:0006810; GO:0051641; GO:0051649; GO:0042886; GO:0071702; GO:0051234; GO:0033036; GO:0051179; GO:0071705; GO:0008150 [GO:0008021]; GO:0044456; GO:0070382; GO:0097458; GO:0098793; GO:0005575; GO:0045202; GO:0030133; GO:0099503; GO:0044464; GO:0012505; GO:0031410; GO:0005623; GO:0044444; …	cell organization and biogenesis;regulation of biological process;transport	membrane			0		1.71635e+07	1.71807e+07	1.78603e+07	1.64496e+07		0.0559672	-0.0627368	0.118704		0.531131	0.519066	1.06598
High	Q6PST4	362750	ENSRNOG00000005063.7	Atl1	Atlastin-1 [OS=Rattus norvegicus]	0	47	16	913	16	1	558	63.3	4485.11	16	[GO:0000137]; GO:0031985; GO:0005795; GO:0098791; GO:0031984; GO:0044431; GO:0043227; GO:0044446; GO:0005794; GO:0044444; GO:0043226; GO:0043229; GO:0044422; GO:0044424; GO:0012505; GO:0043231; GO:0005737; GO:0005575; GO:0005622; GO:0044464; GO:0005623 [GO:0000139]; GO:0044431; GO:0098588; GO:0098791; GO:0005794; GO:0044444; GO:0044446; GO:0031090; GO:0031984; GO:0012505; GO:0043231; GO:0005737; …	cell organization and biogenesis	cytoplasm;endoplasmic reticulum;Golgi;membrane	catalytic activity;nucleotide binding;protein binding		0		1.71502e+07	1.68805e+07	1.80948e+07	1.64753e+07		0.100216	-0.0350573	0.135273		1.50413	0.256617	1.42902
High	Q5XI32	298584	ENSRNOG00000007330.7	Capzb	F-actin-capping protein subunit beta [OS=Rattus norvegicus]	0	49	10	725	10	1	272	30.6	3398.1	10	[GO:0000902]; GO:0032989; GO:0009653; GO:0016043; GO:0048869; GO:0032502; GO:0048856; GO:0009987; GO:0071840; GO:0008150 [GO:0001669]; GO:0030141; GO:0097223; GO:0012505; GO:0099503; GO:0044464; GO:0031410; GO:0005575; GO:0005623; GO:0044444; GO:0097708; GO:0005737; GO:0044424; GO:0031982; GO:0043229; GO:0005622; GO:0043227; GO:0043226 [GO:0003674] [GO:0003779]; GO:0008092; GO:0005515; GO:0005488…	cell organization and biogenesis;regulation of biological process	cytoplasm;cytoskeleton;membrane	protein binding	rno04144	0		1.70968e+07	1.69798e+07	1.71959e+07	1.71147e+07		0.0182438	0.0114086	0.00683523		0.150173	0.064817	0.0364035
High	Q64428	170670	ENSRNOG00000024629.6	Hadha	Trifunctional enzyme subunit alpha, mitochondrial [OS=Rattus norvegicus]	0	50	22	1764	22	1	763	82.6	8107.5	22	[GO:0000062]; GO:0043168; GO:0050662; GO:1901567; GO:1901681; GO:0043167; GO:0048037; GO:0005488; GO:0003674 [GO:0003824]; GO:0003674 [GO:0003857]; GO:0016616; GO:0016614; GO:0016491; GO:0003824; GO:0003674 [GO:0003988]; GO:0016408; GO:0016747; GO:0016746; GO:0016740; GO:0003824; GO:0003674 [GO:0004300]; GO:0016836; GO:0016835; GO:0016829; GO:0003824; GO:0003674 [GO:0005739]; GO:0043231; GO:00444…	metabolic process;response to stimulus	membrane;mitochondrion;organelle lumen	catalytic activity;nucleotide binding;protein binding	rno00310; rno01212; rno00071; rno00650; rno00062; rno00380; rno01100; rno00280; rno01040; rno00640; rno00410; rno01200	0		1.69981e+07	1.67698e+07	1.79383e+07	1.62863e+07		0.0971813	-0.0422109	0.139392		1.02132	0.293652	1.49611
High	P62828	84509	ENSRNOG00000000938.7	Ran	GTP-binding nuclear protein RAN [OS=Rattus norvegicus]	0.004	36	7	250	7	1	216	24.4	995.31	7	[GO:0000054]; GO:0033750; GO:0042254; GO:0051656; GO:0071428; GO:0008104; GO:0051640; GO:0022613; GO:0051234; GO:0071426; GO:0033036; GO:0051641; GO:0044085; GO:0051179; GO:0006405; GO:0006611; GO:0071166; GO:0071840; GO:0008150; GO:0050658; GO:0051168; GO:0006886; GO:0050657; GO:0051236; GO:0006913; GO:0015031; GO:0034613; GO:0046907; GO:0015931; GO:0006403; GO:0051169; GO:0015833; GO:0045184; G…	cell division;cell organization and biogenesis;regulation of biological process;response to stimulus;transport	chromosome;cytoplasm;endosome;membrane;nucleus	catalytic activity;metal ion binding;nucleotide binding;protein binding;RNA binding;transporter activity	rno03008; rno05169; rno03013; rno05166	0		1.69099e+07	1.62742e+07	1.66629e+07	1.77927e+07		0.034047	0.128698	-0.0946509		0.231377	0.898344	0.624989
High	Q5FVI6	299971	ENSRNOG00000004846.5	Atp6v1c1	V-type proton ATPase subunit C 1 [OS=Rattus norvegicus]	0	50	13	516	13	1	382	43.9	2526.1	13	[GO:0000221]; GO:0016471; GO:0033180; GO:0044437; GO:0005774; GO:0033176; GO:0033178; GO:0005773; GO:0044444; GO:0044446; GO:0098588; GO:0098805; GO:0016469; GO:0098796; GO:0043231; GO:0005737; GO:0044424; GO:0043229; GO:0044422; GO:0031090; GO:0016020; GO:0043234; GO:0044425; GO:0043227; GO:0005622; GO:0044464; GO:0043226; GO:0005575; GO:0032991; GO:0005623 [GO:0003674] [GO:0005737]; GO:0044424;…	transport	cytoplasm;membrane	catalytic activity;transporter activity	rno04721; rno00190; rno05323; rno01100; rno04966; rno04150; rno04145	0		1.68611e+07	1.72512e+07	1.6239e+07	1.7093e+07		-0.0872316	-0.0132904	-0.0739412		0.605743	0.0520356	0.435998
High	Q62936-1	58948	ENSRNOG00000002767.8	Dlg3	Disks large homolog 3 [OS=Rattus norvegicus]	0	42	23	501	22	1	849	93.5	2130.99	23	[GO:0001736]; GO:0001738; GO:0007164; GO:0002009; GO:0009653; GO:0048729; GO:0060429; GO:0032502; GO:0048856; GO:0009888; GO:0008150 [GO:0004385]; GO:0016776; GO:0019201; GO:0016772; GO:0019205; GO:0016740; GO:0016301; GO:0003824; GO:0003674 [GO:0005515]; GO:0005488; GO:0003674 [GO:0005615]; GO:0044421; GO:0005575; GO:0005576 [GO:0005737]; GO:0044424; GO:0005622; GO:0044464; GO:0005575; GO:000562…	cell communication;cell organization and biogenesis;metabolic process;regulation of biological process	cytoplasm;membrane	catalytic activity;protein binding	rno04390	1		1.67551e+07	1.65906e+07	1.77164e+07	1.59582e+07		0.0947161	-0.0560741	0.15079		1.95967	0.456181	1.76364
High	Q4V8B0-1	117520		Oxr1	Oxidation resistance protein 1 [OS=Rattus norvegicus]	0	38	19	569	15	1	839	92.8	2447.12	19	[GO:0005730]; GO:0031981; GO:0043232; GO:0044428; GO:0070013; GO:0043228; GO:0043229; GO:0005634; GO:0044446; GO:0043233; GO:0044424; GO:0043226; GO:0043231; GO:0044422; GO:0031974; GO:0005622; GO:0044464; GO:0005575; GO:0043227; GO:0005623 [GO:0005739]; GO:0043231; GO:0044444; GO:0043227; GO:0043229; GO:0005737; GO:0044424; GO:0043226; GO:0005622; GO:0044464; GO:0005575; GO:0005623 [GO:0006979];…	cell death;metabolic process;regulation of biological process;response to stimulus	mitochondrion	catalytic activity		4		1.66794e+07	1.64515e+07	1.69392e+07	1.66475e+07		0.0421486	0.017088	0.0250606		0.228633	0.0630245	0.0955797
High	P62747	64373	ENSRNOG00000021403.2	Rhob	Rho-related GTP-binding protein RhoB [OS=Rattus norvegicus]	0	61	8	763	6	1	196	22.1	3559.88	8	[GO:0000166]; GO:0036094; GO:1901265; GO:0005488; GO:0097159; GO:1901363; GO:0003674 [GO:0000281]; GO:0061640; GO:1903047; GO:0000910; GO:0000278; GO:0022402; GO:0051301; GO:0007049; GO:0009987; GO:0008150 [GO:0001525]; GO:0048514; GO:0048646; GO:0001568; GO:0009653; GO:0032502; GO:0001944; GO:0048856; GO:0008150; GO:0048731; GO:0072358; GO:0007275; GO:0072359; GO:0032501 [GO:0003924]; GO:0017111…	cell death;cell differentiation;development;regulation of biological process;response to stimulus;transport	cytosol;endosome;membrane;nucleus	catalytic activity;nucleotide binding		0		1.65144e+07	1.68285e+07	1.66064e+07	1.61084e+07		-0.0191665	-0.0630901	0.0439236		0.240629	0.773383	0.511909
High	P62959	690660	ENSRNOG00000000622.7	Hint1	Histidine triad nucleotide-binding protein 1 [OS=Rattus norvegicus]	0.005	66	5	330	5	1	126	13.8	1415.11	5	[GO:0000118]; GO:0044451; GO:1902494; GO:0005654; GO:0044428; GO:0032991; GO:0031981; GO:0005634; GO:0044446; GO:0005575; GO:0070013; GO:0043231; GO:0043229; GO:0044422; GO:0044424; GO:0043233; GO:0043227; GO:0043226; GO:0005622; GO:0044464; GO:0031974; GO:0005623 [GO:0000166]; GO:0036094; GO:1901265; GO:0005488; GO:0097159; GO:1901363; GO:0003674 [GO:0003824]; GO:0003674 [GO:0003923]; GO:0016787…	cell death;metabolic process;regulation of biological process;response to stimulus	cytoplasm;cytosol;membrane;nucleus	catalytic activity;nucleotide binding		0		1.64498e+07	1.5851e+07	1.58102e+07	1.76882e+07		-0.0037202	0.158207	-0.161928		0.021806	1.09174	1.23712
High	P10687	24654		Plcb1	1-phosphatidylinositol 4,5-bisphosphate phosphodiesterase beta-1 [OS=Rattus norvegicus]	0	41	35	1582	35	1	1216	138.3	7479.52	35	[GO:0000086]; GO:0044772; GO:0044839; GO:0044770; GO:1903047; GO:0022402; GO:0000278; GO:0007049; GO:0009987; GO:0008150 [GO:0000790]; GO:0000785; GO:0044454; GO:0044427; GO:0000228; GO:0044428; GO:0005694; GO:0044446; GO:0031981; GO:0005634; GO:0043232; GO:0043229; GO:0044422; GO:0044424; GO:0070013; GO:0043231; GO:0043228; GO:0043226; GO:0005575; GO:0005622; GO:0044464; GO:0043233; GO:0043227; …	cell differentiation;metabolic process;regulation of biological process;response to stimulus	cytoplasm;cytosol;membrane;nucleus	catalytic activity;enzyme regulator activity;metal ion binding;protein binding;signal transducer activity	rno04921; rno04912; rno04972; rno04020; rno04071; rno04261; rno04961; rno05010; rno04540; rno05142; rno04933; rno04723; rno04015; rno05146; rno00562; rno04724; rno04915; rno04924; rno01100; rno04725; rno05200; rno04611; rno04918; rno04730; rno04916; rno04922; rno04713; rno04925; rno04270; rno04971; rno04970; rno04750; rno04726; rno04911; rno04070; rno04062; rno05143; rno04022; rno04720; rno04919;…	0		1.64086e+07	1.65158e+07	1.64463e+07	1.62637e+07		-0.00608395	-0.0221929	0.0161089		0.0577492	0.0970227	0.0688081
High	P38983	29236	ENSRNOG00000018645.5	Rpsa	40S ribosomal protein SA [OS=Rattus norvegicus]	0	48	11	558	11	1	295	32.8	2711.97	11	[GO:0000028]; GO:0022618; GO:0042255; GO:0042274; GO:0022613; GO:0034622; GO:0071826; GO:0042254; GO:0070925; GO:0044085; GO:0065003; GO:0043933; GO:0006996; GO:0022607; GO:0071840; GO:0016043; GO:0008150; GO:0009987 [GO:0000447]; GO:0000462; GO:0000466; GO:0000479; GO:0030490; GO:0000460; GO:0000478; GO:0006364; GO:0042274; GO:0000469; GO:0090502; GO:0016072; GO:0034470; GO:0042254; GO:0022613; …	cell differentiation;cell organization and biogenesis;metabolic process;transport	cytoplasm;cytosol;membrane;nucleus;ribosome	protein binding;receptor activity;RNA binding;structural molecule activity	rno03010	0		1.63527e+07	1.61178e+07	1.63692e+07	1.6571e+07		0.0223218	0.0400001	-0.0176784		0.113329	0.176321	0.0707078
High	P02262	365877		Hist2h2aa3	histone H2A type 1 [OS=Rattus norvegicus]	0	44	3	457	1	1	130	14.1	2308.82	3	[GO:0000786]; GO:0000785; GO:0032993; GO:0044427; GO:0044815; GO:0032991; GO:0005694; GO:0044446; GO:0005575; GO:0043232; GO:0043229; GO:0044422; GO:0044424; GO:0043228; GO:0043226; GO:0005622; GO:0044464; GO:0005623 [GO:0000790]; GO:0000785; GO:0044454; GO:0044427; GO:0000228; GO:0044428; GO:0005694; GO:0044446; GO:0031981; GO:0005634; GO:0043232; GO:0043229; GO:0044422; GO:0044424; GO:0070013; …	regulation of biological process	chromosome;nucleus	DNA binding;protein binding		1		1.6325e+07	1.58329e+07	1.91294e+07	1.40126e+07		0.272868	-0.1762	0.449068		0.476125	0.227608	1.08372
High	Q920Q0	170673	ENSRNOG00000009760.8	Palm	Paralemmin-1 [OS=Rattus norvegicus]	0	54	12	625	12	1	383	41.9	2972.55	12	[GO:0005634]; GO:0043231; GO:0043227; GO:0043229; GO:0043226; GO:0044424; GO:0005575; GO:0005622; GO:0044464; GO:0005623 [GO:0005737]; GO:0044424; GO:0005622; GO:0044464; GO:0005575; GO:0005623 [GO:0005886]; GO:0016020; GO:0044464; GO:0071944; GO:0005575; GO:0005623 [GO:0007010]; GO:0006996; GO:0016043; GO:0009987; GO:0071840; GO:0008150 [GO:0007194]; GO:0030818; GO:0031280; GO:0045761; GO:005135…	cell organization and biogenesis;regulation of biological process;response to stimulus	cytoplasm;membrane;nucleus	protein binding		0		1.60003e+07	1.60911e+07	1.64335e+07	1.54763e+07		0.0303742	-0.0562045	0.0865787		0.324699	0.489797	0.803707
High	Q63965	364678		Sfxn1	Sideroflexin-1 [OS=Rattus norvegicus]	0	55	10	1052	8	1	322	35.5	5164.13	10	[GO:0005739]; GO:0043231; GO:0044444; GO:0043227; GO:0043229; GO:0005737; GO:0044424; GO:0043226; GO:0005622; GO:0044464; GO:0005575; GO:0005623 [GO:0005743]; GO:0019866; GO:0031966; GO:0031090; GO:0031967; GO:0044424; GO:0005740; GO:0044429; GO:0016020; GO:0043227; GO:0044422; GO:0031975; GO:0044446; GO:0005622; GO:0044464; GO:0005739; GO:0044444; GO:0005575; GO:0043226; GO:0043229; GO:0005623; …	cell differentiation;transport	membrane;mitochondrion	transporter activity		0		1.57837e+07	1.55869e+07	1.71611e+07	1.4603e+07		0.138812	-0.0940624	0.232875		2.00436	0.612641	2.63564
High	P85970	301511		Arpc2	Actin-related protein 2/3 complex subunit 2 [OS=Rattus norvegicus]	0	58	12	931	12	1	300	34.4	4404.12	12	[GO:0003779]; GO:0008092; GO:0005515; GO:0005488; GO:0003674 [GO:0005200]; GO:0005198; GO:0003674 [GO:0005515]; GO:0005488; GO:0003674 [GO:0005737]; GO:0044424; GO:0005622; GO:0044464; GO:0005575; GO:0005623 [GO:0005768]; GO:0012505; GO:0031410; GO:0044464; GO:0044444; GO:0097708; GO:0005575; GO:0005623; GO:0005737; GO:0044424; GO:0031982; GO:0043229; GO:0005622; GO:0043227; GO:0043226 [GO:000585…	cell organization and biogenesis;regulation of biological process;response to stimulus	cell surface;cytoplasm;cytoskeleton;endosome;membrane	protein binding;structural molecule activity		0		1.57715e+07	1.56854e+07	1.59157e+07	1.57133e+07		0.0210311	0.00256577	0.0184653		0.156831	0.0120016	0.0990857
High	Q62952-2	25418	ENSRNOG00000018992.7	Dpysl3	Isoform 2 of Dihydropyrimidinase-related protein 3 [OS=Rattus norvegicus]	0	36	15	1306	13	1	683	73.9	6490.33	15	[GO:0005615]; GO:0044421; GO:0005575; GO:0005576 [GO:0005829]; GO:0044444; GO:0005737; GO:0044424; GO:0005622; GO:0044464; GO:0005575; GO:0005623 [GO:0007399]; GO:0048731; GO:0007275; GO:0048856; GO:0032501; GO:0032502; GO:0008150 [GO:0010976]; GO:0010975; GO:0031175; GO:0031346; GO:0045666; GO:0045664; GO:0120035; GO:0048666; GO:0120036; GO:0030030; GO:0031344; GO:0051130; GO:0030182; GO:0050769…	cell organization and biogenesis;regulation of biological process;response to stimulus	cytosol	catalytic activity;protein binding		0		1.5744e+07	1.50259e+07	1.49156e+07	1.72906e+07		-0.0106282	0.202534	-0.213162		0.0526922	1.52644	1.8123
High	O35112	79559	ENSRNOG00000001989.6	Alcam	CD166 antigen [OS=Rattus norvegicus]	0	39	16	552	16	1	583	65	2326.31	16	[GO:0001772]; GO:0044459; GO:0005886; GO:0044425; GO:0044464; GO:0016020; GO:0071944; GO:0005575; GO:0005623 [GO:0002250]; GO:0006955; GO:0002376; GO:0050896; GO:0008150 [GO:0002376]; GO:0008150 [GO:0005515]; GO:0005488; GO:0003674 [GO:0005886]; GO:0016020; GO:0044464; GO:0071944; GO:0005575; GO:0005623 [GO:0005887]; GO:0016021; GO:0031226; GO:0031224; GO:0044459; GO:0044425; GO:0005886; GO:00444…	cell growth;cellular component movement;response to stimulus	membrane	protein binding	rno04514	0		1.55685e+07	1.51276e+07	1.64473e+07	1.51306e+07		0.120673	0.000285317	0.120388		1.87171	0.00193834	1.71534
High	D3ZHV2	362587		Macf1	Microtubule-actin cross-linking factor 1 [OS=Rattus norvegicus]	0	25	83	1054	83	1	5430	619.2	4335.33	83	[GO:0001707]; GO:0001704; GO:0048332; GO:0007369; GO:0048646; GO:0007498; GO:0048729; GO:0048598; GO:0009653; GO:0032502; GO:0009888; GO:0009790; GO:0048856; GO:0008150; GO:0007275; GO:0032501 [GO:0003723]; GO:0003676; GO:0097159; GO:1901363; GO:0005488; GO:0003674 [GO:0003779]; GO:0008092; GO:0005515; GO:0005488; GO:0003674 [GO:0005509]; GO:0046872; GO:0043169; GO:0043167; GO:0005488; GO:0003674…	cell organization and biogenesis;regulation of biological process;response to stimulus;transport	cytoplasm;cytoskeleton;Golgi;membrane	catalytic activity;metal ion binding;protein binding;RNA binding		0		1.55508e+07	1.50692e+07	1.68742e+07	1.47091e+07		0.163215	-0.0348945	0.198109		1.83422	0.176832	1.95834
High	Q8K3M6-1	259269		Erc2	ERC protein 2 [OS=Rattus norvegicus]	0	24	16	628	1	1	957	110.6	2728.73	16	[GO:0005515]; GO:0005488; GO:0003674 [GO:0005737]; GO:0044424; GO:0005622; GO:0044464; GO:0005575; GO:0005623 [GO:0005783]; GO:0012505; GO:0043231; GO:0044444; GO:0044464; GO:0043227; GO:0043229; GO:0005737; GO:0044424; GO:0005575; GO:0005623; GO:0043226; GO:0005622 [GO:0005856]; GO:0043232; GO:0043228; GO:0043229; GO:0043226; GO:0044424; GO:0005575; GO:0005622; GO:0044464; GO:0005623 [GO:0007416…	cell organization and biogenesis	cytoplasm;cytoskeleton;endoplasmic reticulum;membrane	protein binding		14		1.5298e+07	1.51286e+07	1.67618e+07	1.40034e+07		0.147896	-0.111501	0.259397		1.79889	0.664742	2.07038
High	P0C5X8	292597	ENSRNOG00000032699.5	Ttyh1	Protein tweety homolog 1 [OS=Rattus norvegicus]	0.005	25	6	324	6	1	450	49	1342.44	6	[GO:0000278]; GO:0007049; GO:0009987; GO:0008150 [GO:0005216]; GO:0015075; GO:0022838; GO:0022891; GO:0015267; GO:0022857; GO:0022892; GO:0022803; GO:0005215; GO:0003674 [GO:0005254]; GO:0005253; GO:0015108; GO:0005216; GO:0008509; GO:0015103; GO:0015075; GO:0022838; GO:0022891; GO:0015267; GO:0022857; GO:0022892; GO:0022803; GO:0005215; GO:0003674 [GO:0005509]; GO:0046872; GO:0043169; GO:0043167…	cell organization and biogenesis;regulation of biological process;transport	membrane	metal ion binding;transporter activity		0		1.52092e+07	1.55558e+07	1.56143e+07	1.44577e+07		0.00541613	-0.105613	0.111029		0.0278484	0.57124	0.609046
High	Q5FVI4	361675; 100911402	ENSRNOG00000045680.1; ENSRNOG00000018448.6	Cend1; LOC100911402	Cell cycle exit and neuronal differentiation protein 1 [OS=Rattus norvegicus]	0.004	74	8	223	8	1	149	15	908.13	8	[GO:0007628]; GO:0008344; GO:0090659; GO:0007626; GO:0030534; GO:0007610; GO:0032501; GO:0008150 [GO:0016020]; GO:0005575 [GO:0016021]; GO:0031224; GO:0044425; GO:0005575; GO:0016020 [GO:0021549]; GO:0022037; GO:0048856; GO:0030902; GO:0032502; GO:0007420; GO:0008150; GO:0007417; GO:0048513; GO:0060322; GO:0007399; GO:0048731; GO:0007275; GO:0032501 [GO:0021686]; GO:0021681; GO:0021699; GO:007169…	cell differentiation;cellular component movement;regulation of biological process;response to stimulus	membrane			0		1.5148e+07	1.42074e+07	1.62334e+07	1.50031e+07		0.192325	0.0786199	0.113705		0.348512	0.132218	0.198965
High	P35332	50872	ENSRNOG00000050983.2	Hpcal4	Hippocalcin-like protein 4 [OS=Rattus norvegicus]	0	72	12	810	11	1	191	22.2	4102.48	12	[GO:0005246]; GO:0099106; GO:0016247; GO:0098772; GO:0003674 [GO:0005509]; GO:0046872; GO:0043169; GO:0043167; GO:0005488; GO:0003674 [GO:0005622]; GO:0044464; GO:0005575; GO:0005623 [GO:0007165]; GO:0007154; GO:0009987; GO:0023052; GO:0050794; GO:0051716; GO:0008150; GO:0050789; GO:0050896; GO:0065007 [GO:0008022]; GO:0005515; GO:0005488; GO:0003674 [GO:0019904]; GO:0005515; GO:0005488; GO:00036…	regulation of biological process;response to stimulus		metal ion binding;protein binding		1		1.51374e+07	1.55077e+07	1.55384e+07	1.4366e+07		0.00284784	-0.110325	0.113173		0.0280224	1.18245	1.21444
High	Q68FQ0	294864	ENSRNOG00000011632.6	Cct5	T-complex protein 1 subunit epsilon [OS=Rattus norvegicus]	0	44	14	663	13	1	541	59.5	3058.57	14	[GO:0000166]; GO:0036094; GO:1901265; GO:0005488; GO:0097159; GO:1901363; GO:0003674 [GO:0002199]; GO:0043234; GO:0032991; GO:0005575 [GO:0003730]; GO:0003729; GO:0003723; GO:0003676; GO:0097159; GO:1901363; GO:0005488; GO:0003674 [GO:0005524]; GO:0032559; GO:0035639; GO:0030554; GO:0032555; GO:0043168; GO:1901265; GO:0017076; GO:0032553; GO:0043167; GO:0097159; GO:1901363; GO:0000166; GO:0097367…	metabolic process;regulation of biological process;response to stimulus;transport	cytoplasm;cytoskeleton;cytosol	nucleotide binding;protein binding;RNA binding		0		1.50889e+07	1.50207e+07	1.51642e+07	1.50817e+07		0.0137148	0.00585054	0.00786429		0.0871865	0.0348697	0.051354
High	P97686	497815		Nrcam	Neuronal cell adhesion molecule [OS=Rattus norvegicus]	0	30	20	854	20	1	1214	133.8	3668.66	20	[GO:0001525]; GO:0048514; GO:0048646; GO:0001568; GO:0009653; GO:0032502; GO:0001944; GO:0048856; GO:0008150; GO:0048731; GO:0072358; GO:0007275; GO:0072359; GO:0032501 [GO:0005515]; GO:0005488; GO:0003674 [GO:0005576]; GO:0005575 [GO:0005886]; GO:0016020; GO:0044464; GO:0071944; GO:0005575; GO:0005623 [GO:0007155]; GO:0022610; GO:0008150 [GO:0007411]; GO:0007409; GO:0097485; GO:0048667; GO:00488…	cell organization and biogenesis;cellular component movement;regulation of biological process	extracellular;membrane	protein binding		0		1.49894e+07	1.47475e+07	1.51777e+07	1.50429e+07		0.0414826	0.0286158	0.0128667		0.294928	0.167522	0.0720762
High	P86252	307498		Pura	Transcriptional activator protein Pur-alpha [OS=Rattus norvegicus]	0	72	6	700	6	1	138	15.3	3571.26	6	[GO:0000900]; GO:0030371; GO:0090079; GO:0045182; GO:0003676; GO:0003674; GO:0097159; GO:1901363; GO:0005488 [GO:0003677]; GO:0003676; GO:0097159; GO:1901363; GO:0005488; GO:0003674 [GO:0003690]; GO:0003677; GO:0003676; GO:0097159; GO:1901363; GO:0005488; GO:0003674 [GO:0003691]; GO:0003690; GO:0042162; GO:0003677; GO:0043565; GO:0003676; GO:0097159; GO:1901363; GO:0005488; GO:0003674 [GO:0003697…	cell differentiation;metabolic process;regulation of biological process	cytoplasm;nucleus	DNA binding;protein binding;RNA binding;translation regulator activity		0		1.49868e+07	1.44084e+07	1.51194e+07	1.54326e+07		0.0694955	0.0990721	-0.0295765		0.4011	0.496553	0.124435
High	P61765	25558	ENSRNOG00000015420.8	Stxbp1	Syntaxin-binding protein 1 [OS=Rattus norvegicus]	0	61	27	4485	1	1	594	67.5	20030.2	27	[GO:0000149]; GO:0005515; GO:0005488; GO:0003674 [GO:0002576]; GO:0045055; GO:0006887; GO:0016192; GO:0032940; GO:0006810; GO:0009987; GO:0046903; GO:0051234; GO:0008150; GO:0051179 [GO:0003006]; GO:0022414; GO:0032502; GO:0000003; GO:0008150 [GO:0003723]; GO:0003676; GO:0097159; GO:1901363; GO:0005488; GO:0003674 [GO:0005515]; GO:0005488; GO:0003674 [GO:0005634]; GO:0043231; GO:0043227; GO:00432…	cell communication;cell organization and biogenesis;regulation of biological process;response to stimulus;transport	cytoplasm;cytoskeleton;cytosol;membrane;mitochondrion;nucleus	protein binding;RNA binding	rno04721	0		1.49587e+07	1.46591e+07	1.51055e+07	1.51115e+07		0.0432746	0.0438497	-0.000575084		0.189556	0.168686	0.00217017
High	Q6URK4	362152	ENSRNOG00000052968.1	Hnrnpa3	Heterogeneous nuclear ribonucleoprotein A3 [OS=Rattus norvegicus]	0	30	10	510	10	1	379	39.6	2233.62	10	[GO:0003676]; GO:0097159; GO:1901363; GO:0005488; GO:0003674 [GO:0003723]; GO:0003676; GO:0097159; GO:1901363; GO:0005488; GO:0003674 [GO:0003729]; GO:0003723; GO:0003676; GO:0097159; GO:1901363; GO:0005488; GO:0003674 [GO:0005634]; GO:0043231; GO:0043227; GO:0043229; GO:0043226; GO:0044424; GO:0005575; GO:0005622; GO:0044464; GO:0005623 [GO:0005654]; GO:0031981; GO:0044428; GO:0070013; GO:000563…	metabolic process;transport	cytoplasm;nucleus;spliceosomal complex	RNA binding;transporter activity	rno03040	0		1.48813e+07	1.42251e+07	1.56602e+07	1.47585e+07		0.138661	0.0531077	0.0855531		0.227824	0.0679254	0.136585
High	P22062	25604		Pcmt1	protein-L-isoaspartate(D-aspartate) O-methyltransferase [OS=Rattus norvegicus]	0	55	8	565	8	1	227	24.6	2588.63	8	[GO:0004719]; GO:0008757; GO:0051998; GO:0008168; GO:0008276; GO:0010340; GO:0016741; GO:0140096; GO:0008171; GO:0016740; GO:0003824; GO:0003674 [GO:0005515]; GO:0005488; GO:0003674 [GO:0005615]; GO:0044421; GO:0005575; GO:0005576 [GO:0005737]; GO:0044424; GO:0005622; GO:0044464; GO:0005575; GO:0005623 [GO:0005829]; GO:0044444; GO:0005737; GO:0044424; GO:0005622; GO:0044464; GO:0005575; GO:000562…	metabolic process;regulation of biological process;response to stimulus	cytoplasm;cytosol;membrane	catalytic activity;protein binding		0		1.48751e+07	1.47185e+07	1.47315e+07	1.51754e+07		0.00127764	0.0441066	-0.042829		0.00982979	0.378801	0.34187
Low	P20695	29596		Ifrd1	Interferon-related developmental regulator 1 [OS=Rattus norvegicus]	0.565	3	1	1	1	1	449	49.8	3.32	1	[GO:0005488]; GO:0003674 [GO:0005634]; GO:0043231; GO:0043227; GO:0043229; GO:0043226; GO:0044424; GO:0005575; GO:0005622; GO:0044464; GO:0005623 [GO:0005737]; GO:0044424; GO:0005622; GO:0044464; GO:0005575; GO:0005623 [GO:0005886]; GO:0016020; GO:0044464; GO:0071944; GO:0005575; GO:0005623 [GO:0007275]; GO:0032501; GO:0048856; GO:0008150; GO:0032502 [GO:0007399]; GO:0048731; GO:0007275; GO:00488…	cell differentiation;cell proliferation;development;regulation of biological process	cytoplasm;membrane;nucleus	protein binding		0		1.47669e+07	1.47583e+07	1.50398e+07	1.45025e+07		0.0272645	-0.0252186	0.0524831		0.208851	0.197976	0.429048
High	P07153	25596		Rpn1	Dolichyl-diphosphooligosaccharide--protein glycosyltransferase subunit 1 [OS=Rattus norvegicus]	0.005	31	11	303	11	1	605	68.3	1207.81	11	[GO:0003723]; GO:0003676; GO:0097159; GO:1901363; GO:0005488; GO:0003674 [GO:0004579]; GO:0004576; GO:0016758; GO:0016757; GO:0016740; GO:0003824; GO:0003674 [GO:0005783]; GO:0012505; GO:0043231; GO:0044444; GO:0044464; GO:0043227; GO:0043229; GO:0005737; GO:0044424; GO:0005575; GO:0005623; GO:0043226; GO:0005622 [GO:0005789]; GO:0016020; GO:0042175; GO:0044425; GO:0044432; GO:0098827; GO:0005575…	metabolic process;transport	cytosol;endoplasmic reticulum;membrane	catalytic activity;RNA binding		0		1.47231e+07	1.47767e+07	1.52148e+07	1.4178e+07		0.0421548	-0.0596699	0.101825		0.487241	0.466436	1.10743
High	P14408-1	24368		Fh	fumarate hydratase, mitochondrial [OS=Rattus norvegicus]	0	48	13	717	13	1	507	54.4	3617.63	13	[GO:0003824]; GO:0003674 [GO:0004333]; GO:0016836; GO:0016835; GO:0016829; GO:0003824; GO:0003674 [GO:0005737]; GO:0044424; GO:0005622; GO:0044464; GO:0005575; GO:0005623 [GO:0005739]; GO:0043231; GO:0044444; GO:0043227; GO:0043229; GO:0005737; GO:0044424; GO:0043226; GO:0005622; GO:0044464; GO:0005575; GO:0005623 [GO:0006099]; GO:0006101; GO:0009060; GO:0044238; GO:0072350; GO:0045333; GO:000815…	metabolic process	cytoplasm;mitochondrion	catalytic activity		0		1.47178e+07	1.48837e+07	1.43542e+07	1.49155e+07		-0.0522594	0.00307917	-0.0553386		0.29273	0.0117286	0.304658
High	Q00960	24410		Grin2b	Glutamate receptor ionotropic, NMDA 2B [OS=Rattus norvegicus]	0	26	25	475	25	1	1482	166	1917.64	25	[GO:0001508]; GO:0042391; GO:0065008; GO:0065007; GO:0008150 [GO:0001662]; GO:0002209; GO:0042596; GO:0006952; GO:0007610; GO:0033555; GO:0006950; GO:0008150; GO:0032501; GO:0050896 [GO:0001666]; GO:0006950; GO:0036293; GO:0050896; GO:0070482; GO:0008150; GO:0009628 [GO:0001701]; GO:0043009; GO:0009792; GO:0009790; GO:0007275; GO:0032501; GO:0048856; GO:0008150; GO:0032502 [GO:0001964]; GO:000960…	cell communication;cell organization and biogenesis;cellular homeostasis;defense response;regulation of biological process;response to stimulus;transport	cell surface;membrane	metal ion binding;protein binding;receptor activity;signal transducer activity;transporter activity	rno05034; rno05010; rno05030; rno04015; rno05322; rno04024; rno04724; rno04080; rno04014; rno05014; rno05033; rno04713; rno05031; rno04720; rno04728; rno05016	0		1.46956e+07	1.46884e+07	1.58292e+07	1.35694e+07		0.107916	-0.11432	0.222237		1.39256	0.591327	1.67348
High	Q91ZN1	155151	ENSRNOG00000019430.3	Coro1a	Coronin-1A [OS=Rattus norvegicus]	0	39	10	751	10	1	461	51	3314.58	10	[GO:0001771]; GO:0009988; GO:0046649; GO:0008037; GO:0045321; GO:0009987; GO:0001775; GO:0002376; GO:0008150 [GO:0001772]; GO:0044459; GO:0005886; GO:0044425; GO:0044464; GO:0016020; GO:0071944; GO:0005575; GO:0005623 [GO:0001845]; GO:0006909; GO:0007040; GO:0016050; GO:0070925; GO:0090382; GO:0006897; GO:0080171; GO:0006996; GO:0022607; GO:0016192; GO:0098657; GO:0007033; GO:0016043; GO:0044085;…	cell differentiation;cell organization and biogenesis;cellular component movement;regulation of biological process;response to stimulus;transport	cytoplasm;cytoskeleton;cytosol;endosome;membrane;nucleus	protein binding;RNA binding	rno05152; rno04145	0		1.4579e+07	1.43006e+07	1.49181e+07	1.45181e+07		0.0609869	0.0217732	0.0392136		0.294805	0.0729619	0.15723
High	P62483	29738	ENSRNOG00000011550.6	Kcnab2	Voltage-gated potassium channel subunit beta-2 [OS=Rattus norvegicus]	0	39	8	564	8	1	367	41	2730.24	8	[GO:0000252]; GO:0016616; GO:0016614; GO:0016491; GO:0003824; GO:0003674 [GO:0002244]; GO:0030097; GO:0030154; GO:0048534; GO:0048869; GO:0002520; GO:0048513; GO:0009987; GO:0032502; GO:0002376; GO:0048731; GO:0048856; GO:0008150; GO:0007275; GO:0032501 [GO:0004033]; GO:0016616; GO:0016614; GO:0016491; GO:0003824; GO:0003674 [GO:0004448]; GO:0016616; GO:0016614; GO:0016491; GO:0003824; GO:0003674…	cell differentiation;cell organization and biogenesis;metabolic process;regulation of biological process;transport	cytoplasm;cytoskeleton;cytosol;membrane	catalytic activity;protein binding;transporter activity		0		1.45178e+07	1.45935e+07	1.5026e+07	1.39338e+07		0.0421309	-0.0667455	0.108876		0.36941	0.553698	0.918965
High	Q64119-2	362816		Myl6l	Myosin light polypeptide 6 [OS=Rattus norvegicus]	0.006	53	7	366	7	1	151	17	1512.8	7	[GO:0003774]; GO:0017111; GO:0016462; GO:0016818; GO:0016817; GO:0016787; GO:0003824; GO:0003674 [GO:0005509]; GO:0046872; GO:0043169; GO:0043167; GO:0005488; GO:0003674 [GO:0006936]; GO:0003012; GO:0003008; GO:0032501; GO:0008150 [GO:0007519]; GO:0014706; GO:0060538; GO:0060537; GO:0007517; GO:0009888; GO:0048513; GO:0061061; GO:0048856; GO:0048731; GO:0032502; GO:0007275; GO:0008150; GO:0032501…	cellular component movement		catalytic activity;metal ion binding;motor activity;structural molecule activity		0		1.44958e+07	1.66733e+07	1.35071e+07	1.33071e+07		-0.303825	-0.325345	0.0215204		0.445839	0.482089	0.261882
High	P50137	64524		Tkt	Transketolase [OS=Rattus norvegicus]	0	58	18	1215	18	1	623	67.6	6027.68	18	[GO:0000287]; GO:0046872; GO:0043169; GO:0043167; GO:0005488; GO:0003674 [GO:0003824]; GO:0003674 [GO:0004802]; GO:0016744; GO:0016740; GO:0003824; GO:0003674 [GO:0005654]; GO:0031981; GO:0044428; GO:0070013; GO:0005634; GO:0044446; GO:0043229; GO:0043233; GO:0044424; GO:0043231; GO:0044422; GO:0043226; GO:0031974; GO:0005622; GO:0044464; GO:0043227; GO:0005575; GO:0005623 [GO:0005777]; GO:004257…	metabolic process;regulation of biological process	membrane	catalytic activity;metal ion binding;protein binding	rno00030; rno01230; rno01100; rno01200	0		1.44659e+07	1.41339e+07	1.31877e+07	1.60762e+07		-0.0999618	0.185768	-0.28573		0.665614	0.98852	1.76411
High	B2GV06	690163	ENSRNOG00000043094.3	Oxct1	Succinyl-CoA:3-ketoacid coenzyme A transferase 1, mitochondrial [OS=Rattus norvegicus]	0	57	17	629	17	1	520	56.2	2934.81	17	[GO:0005654]; GO:0031981; GO:0044428; GO:0070013; GO:0005634; GO:0044446; GO:0043229; GO:0043233; GO:0044424; GO:0043231; GO:0044422; GO:0043226; GO:0031974; GO:0005622; GO:0044464; GO:0043227; GO:0005575; GO:0005623 [GO:0005739]; GO:0043231; GO:0044444; GO:0043227; GO:0043229; GO:0005737; GO:0044424; GO:0043226; GO:0005622; GO:0044464; GO:0005575; GO:0005623 [GO:0005759]; GO:0044429; GO:0070013;…	metabolic process;regulation of biological process;response to stimulus	mitochondrion;organelle lumen	catalytic activity;protein binding	rno00072; rno00650; rno00280	0		1.44302e+07	1.37959e+07	1.46917e+07	1.48031e+07		0.0907654	0.101662	-0.0108966		0.882514	0.759441	0.0635128
High	Q9Z214-1	29546		Homer1	Homer protein homolog 1 [OS=Rattus norvegicus]	0.005	34	12	319	11	1	366	41.3	1413.55	12	[GO:0003009]; GO:0006941; GO:0050881; GO:0006936; GO:0050879; GO:0003012; GO:0032501; GO:0003008; GO:0008150 [GO:0004674]; GO:0004672; GO:0016301; GO:0016773; GO:0140096; GO:0016772; GO:0003824; GO:0016740; GO:0003674 [GO:0005102]; GO:0005515; GO:0005488; GO:0003674 [GO:0005515]; GO:0005488; GO:0003674 [GO:0005524]; GO:0032559; GO:0035639; GO:0030554; GO:0032555; GO:0043168; GO:1901265; GO:001707…	metabolic process;regulation of biological process;response to stimulus	cytoplasm;cytosol;membrane	catalytic activity;nucleotide binding;protein binding;structural molecule activity	rno04724; rno04068	1		1.44201e+07	1.44641e+07	1.53146e+07	1.34818e+07		0.0824282	-0.101464	0.183892		1.20574	0.595504	1.43663
High	P40241	24936	ENSRNOG00000019556.7	Cd9	CD9 antigen [OS=Rattus norvegicus]	0.005	15	2	257	2	1	226	25.2	1396.17	2	[GO:0005178]; GO:0005102; GO:0032403; GO:0050839; GO:0005515; GO:0044877; GO:0005488; GO:0003674 [GO:0005515]; GO:0005488; GO:0003674 [GO:0005615]; GO:0044421; GO:0005575; GO:0005576 [GO:0005887]; GO:0016021; GO:0031226; GO:0031224; GO:0044459; GO:0044425; GO:0005886; GO:0044464; GO:0005575; GO:0016020; GO:0071944; GO:0005623 [GO:0005925]; GO:0005924; GO:0005912; GO:0030055; GO:0070161; GO:003005…	cell organization and biogenesis;cellular component movement;metabolic process;regulation of biological process;response to stimulus;transport	cell surface;membrane	protein binding	rno04640	0		1.43566e+07	1.59835e+07	1.26553e+07	1.4431e+07		-0.336841	-0.147407	-0.189434		1.14457	0.294689	0.429088
High	Q5U318	364052	ENSRNOG00000046996.1	Pea15; Pea15a	Astrocytic phosphoprotein PEA-15 [OS=Rattus norvegicus]	0	45	5	415	5	1	130	15	1880.98	5	[GO:0000077]; GO:0006974; GO:0031570; GO:0033554; GO:0000075; GO:0006950; GO:0051716; GO:0009987; GO:0045786; GO:0050896; GO:0008150; GO:0007049; GO:0048523; GO:0051726; GO:0048519; GO:0050794; GO:0050789; GO:0065007 [GO:0003674] [GO:0005515]; GO:0005488; GO:0003674 [GO:0005575] [GO:0005634]; GO:0043231; GO:0043227; GO:0043229; GO:0043226; GO:0044424; GO:0005575; GO:0005622; GO:0044464; GO:000562…	cell death;regulation of biological process;response to stimulus;transport	cytoplasm;cytosol;nucleus	protein binding		0		1.43361e+07	1.42021e+07	1.38597e+07	1.49465e+07		-0.035214	0.0737041	-0.108918		0.271004	0.47116	0.941362
High	O08875	83825	ENSRNOG00000032922.7	Dclk1	serine/threonine-protein kinase DCLK1 [OS=Rattus norvegicus]	0.006	63	13	415	13	1	433	47.7	1681.82	13	[GO:0000166]; GO:0036094; GO:1901265; GO:0005488; GO:0097159; GO:1901363; GO:0003674 [GO:0001764]; GO:0016477; GO:0048699; GO:0048870; GO:0022008; GO:0006928; GO:0040011; GO:0051674; GO:0007399; GO:0030154; GO:0009987; GO:0008150; GO:0051179; GO:0048731; GO:0048869; GO:0007275; GO:0048856; GO:0032502; GO:0032501 [GO:0004672]; GO:0016301; GO:0016773; GO:0140096; GO:0016772; GO:0003824; GO:0016740;…	cell differentiation;cell growth;cell organization and biogenesis;cellular component movement;development;metabolic process;regulation of biological process;response to stimulus		catalytic activity;nucleotide binding		0		1.43247e+07	1.41278e+07	1.50357e+07	1.38107e+07		0.0898527	-0.0327527	0.122605		0.695334	0.139693	0.8449
High	P04905	24423		Gstm1	Glutathione S-transferase Mu 1 [OS=Rattus norvegicus]	0	49	9	640	7	1	218	25.9	2780.57	9	[GO:0004364]; GO:0016765; GO:0016740; GO:0003824; GO:0003674 [GO:0005496]; GO:0008289; GO:0097159; GO:0005488; GO:0003674 [GO:0005515]; GO:0005488; GO:0003674 [GO:0005576]; GO:0005575 [GO:0005737]; GO:0044424; GO:0005622; GO:0044464; GO:0005575; GO:0005623 [GO:0005829]; GO:0044444; GO:0005737; GO:0044424; GO:0005622; GO:0044464; GO:0005575; GO:0005623 [GO:0006749]; GO:0006518; GO:0006575; GO:0006…	metabolic process;response to stimulus	cytoplasm;cytosol;extracellular	catalytic activity;metal ion binding;protein binding	rno01524; rno05204; rno00980; rno00480; rno00982	0		1.43154e+07	1.35875e+07	1.37347e+07	1.56239e+07		0.0155498	0.201478	-0.185928		0.060165	1.2668	1.14376
High	Q66HA8	288444	ENSRNOG00000000902.7	Hsph1	Heat shock protein 105 kDa [OS=Rattus norvegicus]	0	41	23	865	22	1	858	96.4	3983.23	23	[GO:0000166]; GO:0036094; GO:1901265; GO:0005488; GO:0097159; GO:1901363; GO:0003674 [GO:0000774]; GO:0030554; GO:0060590; GO:0017076; GO:0060589; GO:0000166; GO:0030234; GO:0036094; GO:1901265; GO:0098772; GO:0005488; GO:0097159; GO:1901363; GO:0003674 [GO:0005524]; GO:0032559; GO:0035639; GO:0030554; GO:0032555; GO:0043168; GO:1901265; GO:0017076; GO:0032553; GO:0043167; GO:0097159; GO:1901363;…	metabolic process;regulation of biological process	cytoplasm;cytosol;nucleus	enzyme regulator activity;nucleotide binding;protein binding	rno04141	0		1.43073e+07	1.40043e+07	1.43249e+07	1.45928e+07		0.0326582	0.0593852	-0.0267271		0.325492	0.54706	0.223766
High	P63245	83427; 100911540	ENSRNOG00000049070.2; ENSRNOG00000052620.1	Gnb2l1; Rack1; LOC100911540	Receptor of activated protein C kinase 1 [OS=Rattus norvegicus]	0	49	9	622	9	1	317	35.1	2878.12	9	[GO:0001649]; GO:0001503; GO:0030154; GO:0032501; GO:0048869; GO:0008150; GO:0009987; GO:0032502 [GO:0001891]; GO:0044459; GO:0005886; GO:0044425; GO:0044464; GO:0016020; GO:0071944; GO:0005575; GO:0005623 [GO:0001934]; GO:0001932; GO:0006468; GO:0031401; GO:0042327; GO:0031399; GO:0042325; GO:0006464; GO:0016310; GO:0032270; GO:0045937; GO:0032268; GO:0019220; GO:0036211; GO:0044267; GO:0006796;…	cell death;cell differentiation;cellular homeostasis;development;metabolic process;regulation of biological process;response to stimulus	cytoplasm;cytosol;membrane;mitochondrion;nucleus;ribosome	enzyme regulator activity;protein binding;RNA binding	rno05162	0		1.41885e+07	1.37062e+07	1.41256e+07	1.47338e+07		0.0434796	0.104301	-0.0608214		0.165671	0.348621	0.201314
High	P0C6S7-3	314721		Anks1b	Isoform 3 of Ankyrin repeat and sterile alpha motif domain-containing protein 1B [OS=Rattus norvegicus]	0	31	12	515	12	1	510	57.8	2298.97	12	[GO:0005515]; GO:0005488; GO:0003674 [GO:0005737]; GO:0044424; GO:0005622; GO:0044464; GO:0005575; GO:0005623 [GO:0005829]; GO:0044444; GO:0005737; GO:0044424; GO:0005622; GO:0044464; GO:0005575; GO:0005623 [GO:0005886]; GO:0016020; GO:0044464; GO:0071944; GO:0005575; GO:0005623 [GO:0014069]; GO:0032279; GO:0097458; GO:0099572; GO:0098984; GO:0044464; GO:0043226; GO:0044456; GO:0098794; GO:004520…		cytoplasm;cytosol;membrane	protein binding		0		1.41651e+07	1.4062e+07	1.51899e+07	1.32433e+07		0.111303	-0.0865382	0.197842		1.90128	0.438486	1.5255
High	Q68FR6	293725	ENSRNOG00000020075.7	Eef1g	elongation factor 1-gamma [OS=Rattus norvegicus]	0	44	10	697	10	1	437	50	3058.68	10	[GO:0003746]; GO:0008135; GO:0003723; GO:0003676; GO:0097159; GO:1901363; GO:0005488; GO:0003674 [GO:0004364]; GO:0016765; GO:0016740; GO:0003824; GO:0003674 [GO:0005515]; GO:0005488; GO:0003674 [GO:0005634]; GO:0043231; GO:0043227; GO:0043229; GO:0043226; GO:0044424; GO:0005575; GO:0005622; GO:0044464; GO:0005623 [GO:0005737]; GO:0044424; GO:0005622; GO:0044464; GO:0005575; GO:0005623 [GO:000578…	metabolic process;response to stimulus	cytoplasm;endoplasmic reticulum;membrane;nucleus	catalytic activity;protein binding;RNA binding	rno05134	0		1.40919e+07	1.38064e+07	1.43883e+07	1.40811e+07		0.0595658	0.0284238	0.031142		0.453115	0.148148	0.176668
High	Q9JJK1	192179		Gpm6b	Neuronal membrane glycoprotein M6-b [OS=Rattus norvegicus]	0.006	15	3	357	3	1	265	29	1578.51	3	[GO:0001503]; GO:0032501; GO:0008150 [GO:0005886]; GO:0016020; GO:0044464; GO:0071944; GO:0005575; GO:0005623 [GO:0006810]; GO:0051234; GO:0051179; GO:0008150 [GO:0007275]; GO:0032501; GO:0048856; GO:0008150; GO:0032502 [GO:0007399]; GO:0048731; GO:0007275; GO:0048856; GO:0032501; GO:0032502; GO:0008150 [GO:0015031]; GO:0015833; GO:0045184; GO:0042886; GO:0071702; GO:0008104; GO:0051234; GO:00717…	cell differentiation;cell organization and biogenesis;development;regulation of biological process;transport	membrane			0		1.40861e+07	1.41355e+07	1.42296e+07	1.38933e+07		0.00957006	-0.0249341	0.0345041		0.0835641	0.168391	0.245567
High	Q9JKE3	65171		Scamp5	Secretory carrier-associated membrane protein 5 [OS=Rattus norvegicus]	0.009	9	2	106	2	1	235	26.1	439.7	2	[GO:0000139]; GO:0044431; GO:0098588; GO:0098791; GO:0005794; GO:0044444; GO:0044446; GO:0031090; GO:0031984; GO:0012505; GO:0043231; GO:0005737; GO:0044424; GO:0043229; GO:0044422; GO:0016020; GO:0043227; GO:0044464; GO:0005622; GO:0043226; GO:0005575; GO:0005623 [GO:0005768]; GO:0012505; GO:0031410; GO:0044464; GO:0044444; GO:0097708; GO:0005575; GO:0005623; GO:0005737; GO:0044424; GO:0031982; …	regulation of biological process;response to stimulus;transport	endosome;Golgi;membrane			0		1.38462e+07	1.43893e+07	1.40893e+07	1.30599e+07		-0.0303982	-0.13985	0.109452		0.2635	1.50784	1.1448
High	P62703	100362640; 29426	ENSRNOG00000003201.9	LOC100362640; Rps4x; Rps4x-ps9	40S ribosomal protein S4, X isoform [OS=Rattus norvegicus]	0.005	38	8	312	8	1	263	29.6	1386.16	8	[GO:0003674] [GO:0003723]; GO:0003676; GO:0097159; GO:1901363; GO:0005488; GO:0003674 [GO:0003735]; GO:0005198; GO:0003674 [GO:0005575] [GO:0005622]; GO:0044464; GO:0005575; GO:0005623 [GO:0005737]; GO:0044424; GO:0005622; GO:0044464; GO:0005575; GO:0005623 [GO:0005840]; GO:0030529; GO:0043232; GO:0044444; GO:0044424; GO:1990904; GO:0043228; GO:0043229; GO:0005737; GO:0005622; GO:0044464; GO:0032…	development;metabolic process;regulation of biological process;response to stimulus	cytoplasm;membrane;ribosome	RNA binding;structural molecule activity	rno03010	0		1.38438e+07	1.35514e+07	1.40374e+07	1.39426e+07		0.0508366	0.0410569	0.00977974		0.269619	0.145527	0.0339981
Low	Q9EQH1	84477		Gab2	GRB2-associated-binding protein 2 [OS=Rattus norvegicus]	0.581	3	1	1	1	1	665	73.3	3.3	1	[GO:0005068]; GO:0004871; GO:0030674; GO:0030971; GO:0035591; GO:0003674; GO:0005515; GO:0060090; GO:0005102; GO:1990782; GO:0005488; GO:0019901; GO:0019900; GO:0019899 [GO:0005547]; GO:1901981; GO:0035091; GO:0005543; GO:0008289; GO:0043168; GO:0005488; GO:0043167; GO:0003674 [GO:0005622]; GO:0044464; GO:0005575; GO:0005623 [GO:0005737]; GO:0044424; GO:0005622; GO:0044464; GO:0005575; GO:0005623…	cell differentiation;cellular component movement;regulation of biological process;response to stimulus	cytoplasm;membrane	protein binding	rno04071; rno04666; rno04014; rno05220; rno04664; rno04380; rno04072	0		1.37837e+07	1.10497e+07	9.50359e+06	2.07978e+07		-0.217457	0.91243	-1.12989		0.285537	0.555664	0.694943
High	Q9Z270	58857	ENSRNOG00000014765.6	Vapa	vesicle-associated membrane protein-associated protein A [OS=Rattus norvegicus]	0	39	7	531	6	1	249	27.8	2287.23	7	[GO:0000139]; GO:0044431; GO:0098588; GO:0098791; GO:0005794; GO:0044444; GO:0044446; GO:0031090; GO:0031984; GO:0012505; GO:0043231; GO:0005737; GO:0044424; GO:0043229; GO:0044422; GO:0016020; GO:0043227; GO:0044464; GO:0005622; GO:0043226; GO:0005575; GO:0005623 [GO:0004871]; GO:0003674 [GO:0005515]; GO:0005488; GO:0003674 [GO:0005634]; GO:0043231; GO:0043227; GO:0043229; GO:0043226; GO:0044424…	cell death;cell organization and biogenesis;metabolic process;regulation of biological process;response to stimulus;transport	cytoskeleton;endoplasmic reticulum;membrane;nucleus	protein binding;signal transducer activity	rno04530	1		1.37441e+07	1.35871e+07	1.40726e+07	1.35726e+07		0.0506503	-0.0015429	0.0521932		0.807095	0.0141957	0.803196
High	Q9JI66-3	84484		Slc4a4	Isoform 3 of Electrogenic sodium bicarbonate cotransporter 1 [OS=Rattus norvegicus]	0	27	17	1165	2	1	1094	122.9	5489.61	17	[GO:0005452]; GO:0015103; GO:0015291; GO:0008509; GO:0022804; GO:0015075; GO:0022857; GO:0022891; GO:0005215; GO:0022892; GO:0003674 [GO:0005887]; GO:0016021; GO:0031226; GO:0031224; GO:0044459; GO:0044425; GO:0005886; GO:0044464; GO:0005575; GO:0016020; GO:0071944; GO:0005623 [GO:0006814]; GO:0015672; GO:0030001; GO:0006812; GO:0006811; GO:0006810; GO:0051234; GO:0051179; GO:0008150 [GO:0006820]…	cellular homeostasis;transport	membrane	protein binding;transporter activity		15		1.36414e+07	1.26361e+07	1.36358e+07	1.46523e+07		0.109857	0.213584	-0.103726		0.896045	0.583606	0.248147
High	Q5FVJ0	360921	ENSRNOG00000003428.8	Rufy3	Protein RUFY3 [OS=Rattus norvegicus]	0	39	14	488	14	1	469	52.9	1958.9	14	[GO:0005737]; GO:0044424; GO:0005622; GO:0044464; GO:0005575; GO:0005623 [GO:0005829]; GO:0044444; GO:0005737; GO:0044424; GO:0005622; GO:0044464; GO:0005575; GO:0005623 [GO:0007015]; GO:0030036; GO:0097435; GO:0007010; GO:0030029; GO:0016043; GO:0006996; GO:0009987; GO:0071840; GO:0008150 [GO:0007275]; GO:0032501; GO:0048856; GO:0008150; GO:0032502 [GO:0007399]; GO:0048731; GO:0007275; GO:004885…	cell differentiation;cell organization and biogenesis;development;regulation of biological process	cytoplasm;cytosol;membrane	metal ion binding		0		1.3581e+07	1.35374e+07	1.37992e+07	1.34064e+07		0.0276325	-0.0140264	0.0416589		0.244284	0.115454	0.415596
High	P68403-2	25023		Prkcb	Isoform Beta-II of Protein kinase C beta type [OS=Rattus norvegicus]	0	43	20	1228	11	1	673	76.8	6024.97	20	[GO:0001666]; GO:0006950; GO:0036293; GO:0050896; GO:0070482; GO:0008150; GO:0009628 [GO:0002250]; GO:0006955; GO:0002376; GO:0050896; GO:0008150 [GO:0003682]; GO:0005488; GO:0003674 [GO:0004672]; GO:0016301; GO:0016773; GO:0140096; GO:0016772; GO:0003824; GO:0016740; GO:0003674 [GO:0004674]; GO:0004672; GO:0016301; GO:0016773; GO:0140096; GO:0016772; GO:0003824; GO:0016740; GO:0003674 [GO:000469…	cell death;cell organization and biogenesis;cellular homeostasis;metabolic process;regulation of biological process;response to stimulus;transport	cytoplasm;cytosol;membrane;nucleus	catalytic activity;metal ion binding;nucleotide binding;protein binding		0		1.35178e+07	1.38224e+07	1.34828e+07	1.32483e+07		-0.0358926	-0.0612102	0.0253176		0.351809	0.388007	0.149947
High	P47863	25293	ENSRNOG00000016043.8	Aqp4	Aquaporin-4 [OS=Rattus norvegicus]	0.005	35	5	310	5	1	323	34.5	1416.36	5	[GO:0005215]; GO:0003674 [GO:0005515]; GO:0005488; GO:0003674 [GO:0005737]; GO:0044424; GO:0005622; GO:0044464; GO:0005575; GO:0005623 [GO:0005886]; GO:0016020; GO:0044464; GO:0071944; GO:0005575; GO:0005623 [GO:0005887]; GO:0016021; GO:0031226; GO:0031224; GO:0044459; GO:0044425; GO:0005886; GO:0044464; GO:0005575; GO:0016020; GO:0071944; GO:0005623 [GO:0005911]; GO:0030054; GO:0005575 [GO:00068…	cell organization and biogenesis;cellular homeostasis;regulation of biological process;response to stimulus;transport	cytoplasm;membrane	protein binding;transporter activity	rno04962; rno04976	0		1.33947e+07	1.37299e+07	1.24958e+07	1.39585e+07		-0.135877	0.0238222	-0.159699		0.783831	0.0910295	0.912807
High	Q505J6	681896	ENSRNOG00000042731.3	Slc25a18	Mitochondrial glutamate carrier 2 [OS=Rattus norvegicus]	0.006	23	4	183	4	1	320	34.1	778.85	4	[GO:0005314]; GO:0005313; GO:0015370; GO:0005310; GO:0015172; GO:0015179; GO:0015081; GO:0015294; GO:0046943; GO:0015171; GO:0015077; GO:0046873; GO:0008324; GO:0015293; GO:0005342; GO:0008514; GO:0022890; GO:0015075; GO:0015291; GO:0022891; GO:0008509; GO:0022804; GO:0022857; GO:0022892; GO:0005215; GO:0003674 [GO:0005739]; GO:0043231; GO:0044444; GO:0043227; GO:0043229; GO:0005737; GO:0044424; …	transport	membrane;mitochondrion	transporter activity		0		1.32511e+07	1.30084e+07	1.46355e+07	1.21094e+07		0.170027	-0.103311	0.273337		1.71081	0.558971	2.78927
High	Q99PD4	81824		Arpc1a	Actin-related protein 2/3 complex subunit 1A [OS=Rattus norvegicus]	0	48	10	432	10	1	370	41.6	1862.67	10	[GO:0003674] [GO:0003779]; GO:0008092; GO:0005515; GO:0005488; GO:0003674 [GO:0005515]; GO:0005488; GO:0003674 [GO:0005575] [GO:0005737]; GO:0044424; GO:0005622; GO:0044464; GO:0005575; GO:0005623 [GO:0005856]; GO:0043232; GO:0043228; GO:0043229; GO:0043226; GO:0044424; GO:0005575; GO:0005622; GO:0044464; GO:0005623 [GO:0005885]; GO:0015629; GO:0043234; GO:0044430; GO:0005856; GO:0032991; GO:0044…	cell organization and biogenesis;regulation of biological process	cytoplasm;cytoskeleton	protein binding	rno04666; rno04810; rno05100; rno04144; rno05132	0		1.32497e+07	1.29414e+07	1.28264e+07	1.39813e+07		-0.0128749	0.111498	-0.124372		0.0817583	0.600738	0.781338
High	P14669	25291	ENSRNOG00000002045.7	Anxa3	annexin A3 [OS=Rattus norvegicus]	0	62	14	518	14	1	324	36.3	2084.21	14	[GO:0004859]; GO:0055102; GO:0004857; GO:0030234; GO:0098772; GO:0003674 [GO:0005509]; GO:0046872; GO:0043169; GO:0043167; GO:0005488; GO:0003674 [GO:0005544]; GO:0005543; GO:0008289; GO:0043168; GO:0005488; GO:0043167; GO:0003674 [GO:0005737]; GO:0044424; GO:0005622; GO:0044464; GO:0005575; GO:0005623 [GO:0005829]; GO:0044444; GO:0005737; GO:0044424; GO:0005622; GO:0044464; GO:0005575; GO:000562…	defense response;regulation of biological process;response to stimulus;transport	cytoplasm;cytosol;membrane	enzyme regulator activity;metal ion binding;protein binding		0		1.32295e+07	1.34604e+07	1.37981e+07	1.24301e+07		0.0357555	-0.114874	0.150629		0.315309	1.29923	1.56315
High	M0RC99	100361891; 64633		LOC100361891; Rab5al1; Rab5a	Ras-related protein Rab-5A [OS=Rattus norvegicus]	0.006	50	7	341	7	1	215	23.6	1656.09	7	[GO:0000166]; GO:0036094; GO:1901265; GO:0005488; GO:0097159; GO:1901363; GO:0003674 [GO:0001726]; GO:0031252; GO:0120025; GO:0044464; GO:0042995; GO:0005575; GO:0005623 [GO:0003924]; GO:0017111; GO:0016462; GO:0016818; GO:0016817; GO:0016787; GO:0003824; GO:0003674 [GO:0005525]; GO:0032550; GO:0032561; GO:0035639; GO:0001883; GO:0032549; GO:0019001; GO:0032555; GO:0043168; GO:1901265; GO:0001882…	cell organization and biogenesis;metabolic process;regulation of biological process;response to stimulus;transport	cytoplasm;cytoskeleton;cytosol;endosome;membrane	catalytic activity;nucleotide binding;protein binding	rno05146; rno05152; rno04014; rno05014; rno04144; rno04962; rno04145	0		1.31888e+07	1.24574e+07	1.29476e+07	1.41615e+07		0.0556823	0.184975	-0.129293		0.187542	0.671623	0.48387
High	P12075	94194	ENSRNOG00000016660.5	Cox5b	Cytochrome c oxidase subunit 5B, mitochondrial [OS=Rattus norvegicus]	0.008	29	3	105	3	1	129	13.9	499.87	3	[GO:0004129]; GO:0009055; GO:0015002; GO:0015078; GO:0016676; GO:0016491; GO:0015077; GO:0016675; GO:0003824; GO:0022890; GO:0003674; GO:0008324; GO:0015075; GO:0022891; GO:0022857; GO:0022892; GO:0005215 [GO:0005575] [GO:0005739]; GO:0043231; GO:0044444; GO:0043227; GO:0043229; GO:0005737; GO:0044424; GO:0043226; GO:0005622; GO:0044464; GO:0005575; GO:0005623 [GO:0005740]; GO:0031967; GO:0044429…	metabolic process;response to stimulus;transport	membrane;mitochondrion	catalytic activity;metal ion binding;transporter activity	rno05010; rno00190; rno01100; rno05012; rno04932; rno04260; rno05016	0		1.31433e+07	1.3138e+07	1.40422e+07	1.22496e+07		0.0960235	-0.101004	0.197027		0.578023	0.447239	1.09036
Medium	Q9QZG1	64559	ENSRNOG00000017210.6	Slc22a23	Solute carrier family 22 member 23 [OS=Rattus norvegicus]	0.044	3	2	20	2	1	689	74.2	73.01	2	[GO:0005215]; GO:0003674 [GO:0006810]; GO:0051234; GO:0051179; GO:0008150 [GO:0006811]; GO:0006810; GO:0051234; GO:0051179; GO:0008150 [GO:0008514]; GO:0008509; GO:0015075; GO:0022891; GO:0022857; GO:0022892; GO:0005215; GO:0003674 [GO:0015711]; GO:0006820; GO:0071702; GO:0006811; GO:0006810; GO:0051234; GO:0051179; GO:0008150 [GO:0016020]; GO:0005575 [GO:0016021]; GO:0031224; GO:0044425; GO:0005…	transport	membrane	transporter activity		0		1.29747e+07	1.32725e+07	1.32613e+07	1.23902e+07		-0.00121639	-0.0992437	0.0980273		0.00732227	0.436767	0.393405
High	Q64605-1	25529		Ptprs	Receptor-type tyrosine-protein phosphatase S [OS=Rattus norvegicus]	0	30	31	927	27	1	1907	211.8	4196.93	31	[GO:0004721]; GO:0016791; GO:0140096; GO:0042578; GO:0003824; GO:0016788; GO:0003674; GO:0016787 [GO:0004725]; GO:0004721; GO:0016791; GO:0140096; GO:0042578; GO:0003824; GO:0016788; GO:0003674; GO:0016787 [GO:0005515]; GO:0005488; GO:0003674 [GO:0005886]; GO:0016020; GO:0044464; GO:0071944; GO:0005575; GO:0005623 [GO:0006470]; GO:0006464; GO:0016311; GO:0036211; GO:0044267; GO:0006796; GO:001953…	metabolic process;regulation of biological process	membrane	catalytic activity;protein binding		4		1.29692e+07	1.28896e+07	1.36307e+07	1.23874e+07		0.0806574	-0.0573305	0.137988		1.03783	0.395918	1.17349
High	P63004	83572	ENSRNOG00000002755.6	Pafah1b1	Platelet-activating factor acetylhydrolase IB subunit alpha [OS=Rattus norvegicus]	0.005	37	10	311	10	1	410	46.6	1330.7	10	[GO:0000132]; GO:0040001; GO:0051294; GO:0051293; GO:1902850; GO:0030010; GO:0000226; GO:0051649; GO:0051653; GO:0051656; GO:1903047; GO:0007163; GO:0007010; GO:0007017; GO:0051234; GO:0051641; GO:0022402; GO:0051640; GO:0000278; GO:0009987; GO:0006996; GO:0051179; GO:0007049; GO:0008150; GO:0016043; GO:0071840 [GO:0000226]; GO:0007010; GO:0007017; GO:0006996; GO:0009987; GO:0016043; GO:0008150; …	cell communication;cell differentiation;cell division;cell organization and biogenesis;cell proliferation;cellular component movement;development;metabolic process;regulation of biological process;response to stimulus;transport	chromosome;cytoplasm;cytoskeleton;cytosol;membrane;nucleus	catalytic activity;protein binding	rno01100; rno00565	0		1.28463e+07	1.21778e+07	1.20753e+07	1.42857e+07		-0.0122037	0.230312	-0.242516		0.0578251	1.28108	1.48907
High	P19945	64205	ENSRNOG00000001148.6	Rplp0	60S acidic ribosomal protein P0 [OS=Rattus norvegicus]	0.006	37	7	363	7	1	317	34.2	1611.54	7	[GO:0003723]; GO:0003676; GO:0097159; GO:1901363; GO:0005488; GO:0003674 [GO:0003735]; GO:0005198; GO:0003674 [GO:0005622]; GO:0044464; GO:0005575; GO:0005623 [GO:0005634]; GO:0043231; GO:0043227; GO:0043229; GO:0043226; GO:0044424; GO:0005575; GO:0005622; GO:0044464; GO:0005623 [GO:0005737]; GO:0044424; GO:0005622; GO:0044464; GO:0005575; GO:0005623 [GO:0005783]; GO:0012505; GO:0043231; GO:00444…	response to stimulus;transport	cytoplasm;cytosol;endoplasmic reticulum;membrane;nucleus;ribosome	RNA binding;structural molecule activity	rno03010	0		1.28379e+07	1.23665e+07	1.30507e+07	1.30965e+07		0.0776879	0.0827493	-0.00506138		0.650672	0.464423	0.0232765
High	Q05695	50687		L1cam	Neural cell adhesion molecule L1 [OS=Rattus norvegicus]	0	21	16	692	16	1	1259	140.8	3202.72	16	[GO:0005178]; GO:0005102; GO:0032403; GO:0050839; GO:0005515; GO:0044877; GO:0005488; GO:0003674 [GO:0005515]; GO:0005488; GO:0003674 [GO:0005768]; GO:0012505; GO:0031410; GO:0044464; GO:0044444; GO:0097708; GO:0005575; GO:0005623; GO:0005737; GO:0044424; GO:0031982; GO:0043229; GO:0005622; GO:0043227; GO:0043226 [GO:0005886]; GO:0016020; GO:0044464; GO:0071944; GO:0005575; GO:0005623 [GO:0005925…	cell differentiation;cell organization and biogenesis;cellular component movement;development;regulation of biological process;response to stimulus	cell surface;endosome;membrane	protein binding	rno04360; rno04514	0		1.27933e+07	1.28153e+07	1.25619e+07	1.30027e+07		-0.0288103	0.0209446	-0.0497549		0.286267	0.183077	0.576588
High	P62243	65136	ENSRNOG00000054626.1	Rps8	40S ribosomal protein S8 [OS=Rattus norvegicus]	0.005	44	8	330	8	1	208	24.2	1408.33	8	[GO:0000462]; GO:0030490; GO:0006364; GO:0042274; GO:0016072; GO:0034470; GO:0042254; GO:0022613; GO:0034660; GO:0006396; GO:0044085; GO:0016070; GO:0010467; GO:0071840; GO:0044260; GO:0090304; GO:0043170; GO:0008150; GO:0044237; GO:0006139; GO:0071704; GO:0008152; GO:0009987; GO:0006725; GO:0034641; GO:0044238; GO:0046483; GO:1901360; GO:0006807 [GO:0003674] [GO:0003723]; GO:0003676; GO:0097159;…	metabolic process	cytoplasm;cytosol;endoplasmic reticulum;membrane;nucleus;ribosome	RNA binding;structural molecule activity	rno03010	0		1.27898e+07	1.25015e+07	1.27977e+07	1.30702e+07		0.0337861	0.0641839	-0.0303978		0.170266	0.294511	0.137065
High	Q6AXV4	300111	ENSRNOG00000011952.6	Samm50	sorting and assembly machinery component 50 homolog [OS=Rattus norvegicus]	0	48	13	499	13	1	469	51.9	2288.78	13	[GO:0001401]; GO:0098799; GO:0005741; GO:0044455; GO:0098796; GO:0098798; GO:0031966; GO:0031968; GO:0044425; GO:0044429; GO:0043234; GO:0005740; GO:0031090; GO:0019867; GO:0031967; GO:0044424; GO:0098588; GO:0098805; GO:0005575; GO:0016020; GO:0005739; GO:0044444; GO:0044446; GO:0032991; GO:0043227; GO:0044422; GO:0031975; GO:0005622; GO:0044464; GO:0043231; GO:0005737; GO:0043229; GO:0043226; G…	cell organization and biogenesis;transport	cytoplasm;membrane;mitochondrion			0		1.26394e+07	1.22637e+07	1.3936e+07	1.17185e+07		0.184428	-0.0655998	0.250028		1.4675	0.306794	1.9386
High	P63159	25459; 679571		Hmgb1; Hmg1l1	High mobility group protein B1 [OS=Rattus norvegicus]	0.004	50	8	210	7	1	215	24.9	846.71	8	(content is truncated) [GO:0000122]; GO:0006357; GO:0006366; GO:0045892; GO:0006355; GO:0006351; GO:0010629; GO:1903507; GO:2000113; GO:0010468; GO:1903506; GO:2000112; GO:0010467; GO:0034645; GO:0097659; GO:0010605; GO:1902679; GO:0010558; GO:0031327; GO:0060255; GO:2001141; GO:0010556; GO:0031326; GO:0043170; GO:0009059; GO:0044249; GO:0044260; GO:0032774; GO:0009892; GO:0051253; GO:0009890; GO…	cell differentiation;cell organization and biogenesis;cell proliferation;cellular component movement;cellular homeostasis;defense response;metabolic process;regulation of biological process;response to stimulus;transport	cell surface;chromosome;cytoplasm;cytosol;endosome;extracellular;membrane;nucleus	catalytic activity;DNA binding;enzyme regulator activity;protein binding;RNA binding	rno03410	1		1.26224e+07	1.26983e+07	1.36998e+07	1.14691e+07		0.109518	-0.146879	0.256397		0.357508	0.545485	1.3672
High	Q5BJU7	294568	ENSRNOG00000047476.2	Wasf1	wiskott-Aldrich syndrome protein family member 1 [OS=Rattus norvegicus]	0.006	30	11	335	11	1	559	61.5	1426.54	11	[GO:0003779]; GO:0008092; GO:0005515; GO:0005488; GO:0003674 [GO:0005515]; GO:0005488; GO:0003674 [GO:0005737]; GO:0044424; GO:0005622; GO:0044464; GO:0005575; GO:0005623 [GO:0005739]; GO:0043231; GO:0044444; GO:0043227; GO:0043229; GO:0005737; GO:0044424; GO:0043226; GO:0005622; GO:0044464; GO:0005575; GO:0005623 [GO:0005741]; GO:0031966; GO:0031968; GO:0005740; GO:0031090; GO:0044429; GO:001986…	cell growth;cell organization and biogenesis;regulation of biological process;response to stimulus;transport	cytoplasm;cytoskeleton;membrane;mitochondrion	protein binding	rno04666; rno04520; rno05231; rno04810; rno05100; rno05132	0		1.26145e+07	1.26103e+07	1.31253e+07	1.2108e+07		0.0577527	-0.0586475	0.1164		0.793654	0.357611	0.932019
High	P30835	25741	ENSRNOG00000001214.5	Pfkl	ATP-dependent 6-phosphofructokinase, liver type [OS=Rattus norvegicus]	0	30	14	675	12	1	780	85.3	3095.04	14	[GO:0000166]; GO:0036094; GO:1901265; GO:0005488; GO:0097159; GO:1901363; GO:0003674 [GO:0003824]; GO:0003674 [GO:0003872]; GO:0008443; GO:0016773; GO:0019200; GO:0016772; GO:0016301; GO:0016740; GO:0003824; GO:0003674 [GO:0004331]; GO:0050308; GO:0019203; GO:0016791; GO:0042578; GO:0016788; GO:0016787; GO:0003824; GO:0003674 [GO:0005524]; GO:0032559; GO:0035639; GO:0030554; GO:0032555; GO:004316…	cell organization and biogenesis;metabolic process;regulation of biological process;response to stimulus	cytoplasm;cytosol;membrane	catalytic activity;metal ion binding;nucleotide binding;protein binding	rno00010; rno00052; rno05230; rno00030; rno01230; rno01100; rno03018; rno04152; rno00051; rno04066; rno04922; rno01200	0		1.26131e+07	1.21238e+07	1.23394e+07	1.33762e+07		0.0254373	0.14183	-0.116392		0.164878	0.903694	0.711418
High	Q66HA6	500282	ENSRNOG00000055860.1	Arl8b	ADP-ribosylation factor-like protein 8B [OS=Rattus norvegicus]	0	58	9	447	9	1	186	21.5	2051.49	9	[GO:0000166]; GO:0036094; GO:1901265; GO:0005488; GO:0097159; GO:1901363; GO:0003674 [GO:0003924]; GO:0017111; GO:0016462; GO:0016818; GO:0016817; GO:0016787; GO:0003824; GO:0003674 [GO:0004871]; GO:0003674 [GO:0005525]; GO:0032550; GO:0032561; GO:0035639; GO:0001883; GO:0032549; GO:0019001; GO:0032555; GO:0043168; GO:1901265; GO:0001882; GO:0017076; GO:0032553; GO:0043167; GO:0097159; GO:1901363…	cell division;regulation of biological process;response to stimulus	cytoplasm;cytoskeleton;endosome;membrane;vacuole	catalytic activity;nucleotide binding;protein binding;signal transducer activity		0		1.25272e+07	1.26092e+07	1.23795e+07	1.25929e+07		-0.02653	-0.00187247	-0.0246576		0.191532	0.00999789	0.147908
High	Q9Z2F5	29382		Ctbp1	C-terminal-binding protein 1 [OS=Rattus norvegicus]	0.006	36	9	327	9	1	430	46.6	1567.01	9	[GO:0000122]; GO:0006357; GO:0006366; GO:0045892; GO:0006355; GO:0006351; GO:0010629; GO:1903507; GO:2000113; GO:0010468; GO:1903506; GO:2000112; GO:0010467; GO:0034645; GO:0097659; GO:0010605; GO:1902679; GO:0010558; GO:0031327; GO:0060255; GO:2001141; GO:0010556; GO:0031326; GO:0043170; GO:0009059; GO:0044249; GO:0044260; GO:0032774; GO:0009892; GO:0051253; GO:0009890; GO:0031324; GO:0019222; G…	cell differentiation;cell organization and biogenesis;metabolic process;regulation of biological process	cytoplasm;cytosol;nucleus	catalytic activity;nucleotide binding;protein binding	rno04330; rno05200; rno05220; rno04310	0		1.24981e+07	1.22154e+07	1.35214e+07	1.17576e+07		0.146548	-0.055104	0.201652		1.70286	0.273748	1.75842
High	Q63362	25488	ENSRNOG00000005698.2	Ndufa5	NADH dehydrogenase [ubiquinone] 1 alpha subcomplex subunit 5 [OS=Rattus norvegicus]	0	58	6	576	6	1	116	13.4	3218.91	6	[GO:0003674] [GO:0005575] [GO:0005739]; GO:0043231; GO:0044444; GO:0043227; GO:0043229; GO:0005737; GO:0044424; GO:0043226; GO:0005622; GO:0044464; GO:0005575; GO:0005623 [GO:0005743]; GO:0019866; GO:0031966; GO:0031090; GO:0031967; GO:0044424; GO:0005740; GO:0044429; GO:0016020; GO:0043227; GO:0044422; GO:0031975; GO:0044446; GO:0005622; GO:0044464; GO:0005739; GO:0044444; GO:0005575; GO:0043226…	cell organization and biogenesis;metabolic process;transport	membrane;mitochondrion	catalytic activity	rno05010; rno00190; rno01100; rno05012; rno04932; rno05016	0		1.2486e+07	1.27111e+07	1.31242e+07	1.16225e+07		0.0461362	-0.129172	0.175308		0.145713	0.347991	0.531226
High	Q64548-2	116644	ENSRNOG00000004794.8	Rtn1	Isoform RTN1-S of Reticulon-1 [OS=Rattus norvegicus]	0.005	26	5	292	3	1	208	23.5	1125.02	5	[GO:0005783]; GO:0012505; GO:0043231; GO:0044444; GO:0044464; GO:0043227; GO:0043229; GO:0005737; GO:0044424; GO:0005575; GO:0005623; GO:0043226; GO:0005622 [GO:0005789]; GO:0016020; GO:0042175; GO:0044425; GO:0044432; GO:0098827; GO:0005575; GO:0012505; GO:0044464; GO:0005783; GO:0044444; GO:0044446; GO:0031984; GO:0005623; GO:0043231; GO:0005737; GO:0044424; GO:0043229; GO:0044422; GO:0043227; …	cell differentiation	endoplasmic reticulum;membrane			0		1.24432e+07	1.23358e+07	1.2493e+07	1.25007e+07		0.0182711	0.0191562	-0.000885028		0.0462764	0.0444518	0.00236355
High	Q62889-1	171297		Nlgn3	Neuroligin-3 [OS=Rattus norvegicus]	0.005	23	9	273	8	1	848	93.8	1173.75	9	[GO:0002087]; GO:0044065; GO:0050877; GO:0003016; GO:0043576; GO:0044057; GO:0003008; GO:0007585; GO:0051239; GO:0032501; GO:0050789; GO:0008150; GO:0065007 [GO:0004872]; GO:0060089; GO:0003674 [GO:0005886]; GO:0016020; GO:0044464; GO:0071944; GO:0005575; GO:0005623 [GO:0005887]; GO:0016021; GO:0031226; GO:0031224; GO:0044459; GO:0044425; GO:0005886; GO:0044464; GO:0005575; GO:0016020; GO:0071944…	cell differentiation;cell growth;cell organization and biogenesis;metabolic process;regulation of biological process;response to stimulus;transport	cell surface;membrane	catalytic activity;protein binding;receptor activity	rno04514	0		1.2442e+07	1.20397e+07	1.24468e+07	1.28395e+07		0.0479743	0.0927871	-0.0448128		0.267938	0.47989	0.231248
High	P52481	116653	ENSRNOG00000043350.3	Cap2	Adenylyl cyclase-associated protein 2 [OS=Rattus norvegicus]	0	49	15	492	15	1	477	52.9	2136.53	15	[GO:0000902]; GO:0032989; GO:0009653; GO:0016043; GO:0048869; GO:0032502; GO:0048856; GO:0009987; GO:0071840; GO:0008150 [GO:0003779]; GO:0008092; GO:0005515; GO:0005488; GO:0003674 [GO:0005886]; GO:0016020; GO:0044464; GO:0071944; GO:0005575; GO:0005623 [GO:0007010]; GO:0006996; GO:0016043; GO:0009987; GO:0071840; GO:0008150 [GO:0007163]; GO:0009987; GO:0008150 [GO:0007165]; GO:0007154; GO:00099…	cell organization and biogenesis;regulation of biological process;response to stimulus	cytoskeleton;membrane	protein binding		0		1.24225e+07	1.23358e+07	1.23564e+07	1.25752e+07		0.00240477	0.0277346	-0.0253298		0.011899	0.110565	0.105526
High	Q9EPH8	171350	ENSRNOG00000008639.7	Pabpc1	Polyadenylate-binding protein 1 [OS=Rattus norvegicus]	0.006	26	13	372	13	1	636	70.7	1666.44	13	[GO:0000184]; GO:0000956; GO:0006402; GO:0006401; GO:0010629; GO:0016071; GO:0016070; GO:0034655; GO:0044265; GO:0010467; GO:0010468; GO:0010605; GO:0044260; GO:0090304; GO:0006139; GO:0019439; GO:0044270; GO:0046700; GO:1901361; GO:0009057; GO:0044248; GO:0043170; GO:0060255; GO:0009892; GO:0044237; GO:0006725; GO:0034641; GO:0044238; GO:0046483; GO:1901360; GO:1901575; GO:0009056; GO:0071704; G…	metabolic process;regulation of biological process	cytoplasm;cytosol;membrane;nucleus;spliceosomal complex	protein binding;RNA binding	rno03015; rno03018; rno03013	0		1.23886e+07	1.22311e+07	1.23035e+07	1.2631e+07		0.00851969	0.0464172	-0.0378975		0.0402222	0.230783	0.192861
High	Q8VHW5	140729		Cacng8	Voltage-dependent calcium channel gamma-8 subunit [OS=Rattus norvegicus]	0	47	9	780	9	1	421	43.2	4084.11	9	[GO:0005216]; GO:0015075; GO:0022838; GO:0022891; GO:0015267; GO:0022857; GO:0022892; GO:0022803; GO:0005215; GO:0003674 [GO:0005244]; GO:0005216; GO:0022832; GO:0015075; GO:0022838; GO:0022836; GO:0022891; GO:0015267; GO:0022857; GO:0022892; GO:0022803; GO:0005215; GO:0003674 [GO:0005245]; GO:0005262; GO:0022843; GO:0005261; GO:0015085; GO:0005244; GO:0005216; GO:0008324; GO:0046873; GO:0072509;…	regulation of biological process;transport	membrane	protein binding;transporter activity	rno04921; rno04010; rno04261; rno05412; rno05414; rno04260; rno05410	0		1.23559e+07	1.22218e+07	1.32491e+07	1.15969e+07		0.116445	-0.075719	0.192164		0.829025	0.280505	1.03118
High	P85973	290029	ENSRNOG00000009982.6	Pnp	purine nucleoside phosphorylase [OS=Rattus norvegicus]	0	73	13	590	13	1	289	32.3	2717.75	13	[GO:0001882]; GO:0036094; GO:0097159; GO:0097367; GO:1901363; GO:0005488; GO:0003674 [GO:0002060]; GO:0002054; GO:0036094; GO:0097159; GO:1901363; GO:0005488; GO:0003674 [GO:0003824]; GO:0003674 [GO:0004731]; GO:0016763; GO:0016757; GO:0016740; GO:0003824; GO:0003674 [GO:0005576]; GO:0005575 [GO:0005622]; GO:0044464; GO:0005575; GO:0005623 [GO:0005634]; GO:0043231; GO:0043227; GO:0043229; GO:0043…	metabolic process;regulation of biological process;response to stimulus;transport	cytoplasm;cytoskeleton;extracellular;nucleus	catalytic activity		0		1.23187e+07	1.15739e+07	1.19897e+07	1.33926e+07		0.0509238	0.210565	-0.159641		0.109743	0.51509	0.439128
High	Q3KRE8	291081	ENSRNOG00000017445.5	Tubb2b	Tubulin beta-2B chain [OS=Rattus norvegicus]	0	80	29	10524	1	1	445	49.9	48924.5	29	[GO:0000166]; GO:0036094; GO:1901265; GO:0005488; GO:0097159; GO:1901363; GO:0003674 [GO:0001764]; GO:0016477; GO:0048699; GO:0048870; GO:0022008; GO:0006928; GO:0040011; GO:0051674; GO:0007399; GO:0030154; GO:0009987; GO:0008150; GO:0051179; GO:0048731; GO:0048869; GO:0007275; GO:0048856; GO:0032502; GO:0032501 [GO:0003674] [GO:0003924]; GO:0017111; GO:0016462; GO:0016818; GO:0016817; GO:0016787…	cell organization and biogenesis;cellular component movement;regulation of biological process	cytoplasm;cytoskeleton;nucleus	catalytic activity;nucleotide binding;protein binding;structural molecule activity	rno04540; rno04145	1		1.22384e+07	1.20567e+07	1.23925e+07	1.2266e+07		0.0396237	0.0248254	0.0147982		0.24005	0.144622	0.0693528
High	Q99ML5	246302	ENSRNOG00000016704.6	Pcyox1	Prenylcysteine oxidase [OS=Rattus norvegicus]	0	41	11	570	11	1	504	56.3	2673.67	11	[GO:0001735]; GO:0016670; GO:0016667; GO:0016491; GO:0003824; GO:0003674 [GO:0005764]; GO:0000323; GO:0005773; GO:0043231; GO:0044444; GO:0043227; GO:0043229; GO:0005737; GO:0044424; GO:0043226; GO:0005622; GO:0044464; GO:0005575; GO:0005623 [GO:0005774]; GO:0044437; GO:0098588; GO:0098805; GO:0005773; GO:0044444; GO:0044446; GO:0031090; GO:0016020; GO:0043231; GO:0005737; GO:0044424; GO:0043229;…	metabolic process;transport	membrane;vacuole	catalytic activity;transporter activity	rno00900	0		1.22173e+07	1.1952e+07	1.31964e+07	1.15034e+07		0.142892	-0.0551865	0.198079		1.53285	0.327221	1.76176
High	Q9QX69	114515	ENSRNOG00000013557.5	Lancl1	LanC-like protein 1 [OS=Rattus norvegicus]	0.004	57	13	219	13	1	399	45.2	849.65	13	[GO:0005737]; GO:0044424; GO:0005622; GO:0044464; GO:0005575; GO:0005623 [GO:0005886]; GO:0016020; GO:0044464; GO:0071944; GO:0005575; GO:0005623 [GO:0005887]; GO:0016021; GO:0031226; GO:0031224; GO:0044459; GO:0044425; GO:0005886; GO:0044464; GO:0005575; GO:0016020; GO:0071944; GO:0005623 [GO:0007165]; GO:0007154; GO:0009987; GO:0023052; GO:0050794; GO:0051716; GO:0008150; GO:0050789; GO:0050896…	regulation of biological process;response to stimulus	cytoplasm;membrane	metal ion binding;protein binding		0		1.219e+07	1.21893e+07	1.22953e+07	1.20855e+07		0.0124944	-0.0123297	0.0248241		0.0832176	0.0814412	0.162805
High	Q63081	286906		Pdia6	Protein disulfide-isomerase A6 [OS=Rattus norvegicus]	0	44	12	812	12	1	440	48.1	3783.52	12	[GO:0003756]; GO:0016864; GO:0140096; GO:0016860; GO:0003824; GO:0016853; GO:0003674 [GO:0005509]; GO:0046872; GO:0043169; GO:0043167; GO:0005488; GO:0003674 [GO:0005515]; GO:0005488; GO:0003674 [GO:0005615]; GO:0044421; GO:0005575; GO:0005576 [GO:0005783]; GO:0012505; GO:0043231; GO:0044444; GO:0044464; GO:0043227; GO:0043229; GO:0005737; GO:0044424; GO:0005575; GO:0005623; GO:0043226; GO:000562…	cellular homeostasis;metabolic process;regulation of biological process;response to stimulus;transport	cytosol;endoplasmic reticulum;membrane;organelle lumen	catalytic activity;metal ion binding;protein binding	rno04141	0		1.21251e+07	1.21236e+07	1.23859e+07	1.18658e+07		0.030876	-0.0310154	0.0618914		0.175152	0.145072	0.375574
High	P20651	24675		Ppp3cb	serine/threonine-protein phosphatase 2B catalytic subunit beta isoform [OS=Rattus norvegicus]	0	56	18	1112	10	1	525	59.1	4814.69	18	[GO:0001915]; GO:0001911; GO:0001913; GO:0001914; GO:0002710; GO:0001909; GO:0001910; GO:0031342; GO:0002456; GO:0002709; GO:0002707; GO:0002823; GO:0001906; GO:0031341; GO:0048519; GO:0002449; GO:0002460; GO:0002706; GO:0002822; GO:0002704; GO:0002820; GO:0008150; GO:0050789; GO:0002443; GO:0002250; GO:0002703; GO:0002819; GO:0002698; GO:0050777; GO:0065007; GO:0002252; GO:0006955; GO:0002697; G…	cell differentiation;cellular homeostasis;metabolic process;regulation of biological process;response to stimulus;transport	cytosol;membrane	catalytic activity;metal ion binding;protein binding	rno04921; rno04010; rno04020; rno04662; rno05010; rno04360; rno04370; rno05152; rno04660; rno04650; rno04724; rno04924; rno04114; rno05014; rno04922; rno05031; rno04380; rno05166; rno04022; rno04658; rno04720; rno04728; rno04310	0		1.21107e+07	1.19389e+07	1.23355e+07	1.20578e+07		0.0471373	0.0142931	0.0328442		0.502295	0.0778551	0.208023
High	P04906	24426	ENSRNOG00000018237.4	Gstp1	Glutathione S-transferase P [OS=Rattus norvegicus]	0.005	33	5	319	5	1	210	23.4	1376.57	5	[GO:0000302]; GO:0006979; GO:1901700; GO:0006950; GO:0042221; GO:0050896; GO:0008150 [GO:0004364]; GO:0016765; GO:0016740; GO:0003824; GO:0003674 [GO:0004602]; GO:0004601; GO:0016209; GO:0016684; GO:0003674; GO:0016491; GO:0003824 [GO:0005515]; GO:0005488; GO:0003674 [GO:0005615]; GO:0044421; GO:0005575; GO:0005576 [GO:0005622]; GO:0044464; GO:0005575; GO:0005623 [GO:0005634]; GO:0043231; GO:0043…	cell communication;cell proliferation;metabolic process;regulation of biological process;response to stimulus	cytoplasm;cytosol;membrane;mitochondrion;nucleus	antioxidant activity;catalytic activity;enzyme regulator activity;protein binding	rno01524; rno05215; rno05204; rno00980; rno00480; rno00982	0		1.20943e+07	1.20698e+07	1.05998e+07	1.36133e+07		-0.187365	0.173611	-0.360975		1.42338	0.729854	1.90297
High	Q5HZV9-1	301618		Ppp1r7	Protein phosphatase 1 regulatory subunit 7 [OS=Rattus norvegicus]	0	66	17	523	17	1	360	41.3	2491.58	17	[GO:0005515]; GO:0005488; GO:0003674 [GO:0005634]; GO:0043231; GO:0043227; GO:0043229; GO:0043226; GO:0044424; GO:0005575; GO:0005622; GO:0044464; GO:0005623 [GO:0005694]; GO:0043232; GO:0043228; GO:0043229; GO:0043226; GO:0044424; GO:0005575; GO:0005622; GO:0044464; GO:0005623 [GO:0007059]; GO:0009987; GO:0008150 [GO:0035307]; GO:0006470; GO:0031401; GO:0035304; GO:0035306; GO:0006464; GO:001631…	regulation of biological process	chromosome;nucleus	protein binding		0		1.19702e+07	1.19411e+07	1.20383e+07	1.19314e+07		0.011696	-0.00117354	0.0128696		0.0778041	0.00549367	0.0686138
High	Q9EPC6	81531; 100909840	ENSRNOG00000017427.8	Pfn2; LOC100909840	Profilin-2 [OS=Rattus norvegicus]	0	38	3	621	3	1	140	15	2957.78	3	[GO:0003779]; GO:0008092; GO:0005515; GO:0005488; GO:0003674 [GO:0003785]; GO:0003779; GO:0008092; GO:0005515; GO:0005488; GO:0003674 [GO:0005546]; GO:1902936; GO:1901981; GO:0035091; GO:0005543; GO:0008289; GO:0043168; GO:0005488; GO:0043167; GO:0003674 [GO:0005737]; GO:0044424; GO:0005622; GO:0044464; GO:0005575; GO:0005623 [GO:0005856]; GO:0043232; GO:0043228; GO:0043229; GO:0043226; GO:004442…	cell organization and biogenesis;regulation of biological process	cytoplasm;cytoskeleton	catalytic activity;protein binding	rno04015; rno04810; rno05132	0		1.19696e+07	1.10859e+07	1.13119e+07	1.35111e+07		0.0291183	0.285423	-0.256305		0.115362	1.36268	1.22969
High	D4A7N1	297436	ENSRNOG00000060248.1	Chchd6	MICOS complex subunit mic25 [OS=Rattus norvegicus]	0.007	37	8	164	8	1	261	29.2	746.77	8	[GO:0005739]; GO:0043231; GO:0044444; GO:0043227; GO:0043229; GO:0005737; GO:0044424; GO:0043226; GO:0005622; GO:0044464; GO:0005575; GO:0005623 [GO:0005743]; GO:0019866; GO:0031966; GO:0031090; GO:0031967; GO:0044424; GO:0005740; GO:0044429; GO:0016020; GO:0043227; GO:0044422; GO:0031975; GO:0044446; GO:0005622; GO:0044464; GO:0005739; GO:0044444; GO:0005575; GO:0043226; GO:0043229; GO:0005623; …	cell organization and biogenesis;response to stimulus	cytosol;membrane;mitochondrion			0		1.19264e+07	1.20979e+07	1.2741e+07	1.09403e+07		0.0747158	-0.145107	0.219823		0.52807	0.822765	1.63341
High	P21913	298596	ENSRNOG00000007967.7	Sdhb	Succinate dehydrogenase [ubiquinone] iron-sulfur subunit, mitochondrial [OS=Rattus norvegicus]	0.007	21	5	193	5	1	282	31.8	712.04	5	[GO:0005654]; GO:0031981; GO:0044428; GO:0070013; GO:0005634; GO:0044446; GO:0043229; GO:0043233; GO:0044424; GO:0043231; GO:0044422; GO:0043226; GO:0031974; GO:0005622; GO:0044464; GO:0043227; GO:0005575; GO:0005623 [GO:0005739]; GO:0043231; GO:0044444; GO:0043227; GO:0043229; GO:0005737; GO:0044424; GO:0043226; GO:0005622; GO:0044464; GO:0005575; GO:0005623 [GO:0005743]; GO:0019866; GO:0031966;…	metabolic process;transport	membrane;mitochondrion	catalytic activity;metal ion binding	rno05010; rno00020; rno00190; rno01100; rno05012; rno04932; rno05016; rno01200	0		1.17863e+07	1.19677e+07	1.25782e+07	1.08129e+07		0.0717723	-0.146399	0.218171		0.490357	0.847973	1.59067
High	Q8VI04	246307	ENSRNOG00000020202.6	Asrgl1	isoaspartyl peptidase/L-asparaginase [OS=Rattus norvegicus]	0	38	9	438	9	1	333	34.4	2012.68	9	[GO:0003948]; GO:0016811; GO:0016810; GO:0016787; GO:0003824; GO:0003674 [GO:0004067]; GO:0016811; GO:0016810; GO:0016787; GO:0003824; GO:0003674 [GO:0005634]; GO:0043231; GO:0043227; GO:0043229; GO:0043226; GO:0044424; GO:0005575; GO:0005622; GO:0044464; GO:0005623 [GO:0005737]; GO:0044424; GO:0005622; GO:0044464; GO:0005575; GO:0005623 [GO:0006508]; GO:0019538; GO:0043170; GO:0044238; GO:190156…	metabolic process	cytoplasm;nucleus	catalytic activity		0		1.17562e+07	1.1553e+07	1.12614e+07	1.24542e+07		-0.0368766	0.108371	-0.145248		0.267654	1.01356	1.48288
High	88				88	0	64	8	509	1	1	189	21.3	2796.36	8						7		1.16467e+07	1.13494e+07	1.11851e+07	1.24057e+07		-0.0210423	0.128384	-0.149426		0.141451	1.12017	1.3531
High	Q6AYH5	299850	ENSRNOG00000025481.4	Dctn2	dynactin subunit 2 [OS=Rattus norvegicus]	0	43	11	536	11	1	402	44.1	2571.22	11	[GO:0000278]; GO:0007049; GO:0009987; GO:0008150 [GO:0000776]; GO:0000775; GO:0043232; GO:0043234; GO:0044427; GO:0098687; GO:0043228; GO:0043229; GO:0032991; GO:0005694; GO:0044446; GO:0043226; GO:0044424; GO:0005575; GO:0044422; GO:0005622; GO:0044464; GO:0005623 [GO:0003674] [GO:0003774]; GO:0017111; GO:0016462; GO:0016818; GO:0016817; GO:0016787; GO:0003824; GO:0003674 [GO:0005737]; GO:004442…	cell organization and biogenesis;cell proliferation;transport	chromosome;cytoplasm;cytoskeleton;cytosol;membrane	catalytic activity;motor activity;protein binding	rno04962; rno05016	0		1.15759e+07	1.17434e+07	1.15033e+07	1.14811e+07		-0.0297968	-0.0325915	0.00279474		0.273249	0.280624	0.0190954
High	24				24	0.006	48	22	350	16	1	643	65.8	1497.06	22						6		1.15611e+07	8.24687e+06	1.00362e+07	1.64003e+07		0.283301	0.991806	-0.708505		0.337285	0.99427	0.682403
High	Q62812	100911597; 25745		LOC100911597; Myh9; Myh9l1	Myosin-9 [OS=Rattus norvegicus]	0	29	43	993	33	1	1961	226.2	4607.37	43	[GO:0000146]; GO:0003774; GO:0017111; GO:0016462; GO:0016818; GO:0016817; GO:0016787; GO:0003824; GO:0003674 [GO:0000166]; GO:0036094; GO:1901265; GO:0005488; GO:0097159; GO:1901363; GO:0003674 [GO:0000212]; GO:0007051; GO:1903046; GO:0000226; GO:0022402; GO:0022414; GO:0051321; GO:0007010; GO:0007017; GO:0007049; GO:0009987; GO:0000003; GO:0008150; GO:0006996; GO:0016043; GO:0071840 [GO:0000904]…	cell differentiation;cell organization and biogenesis;cellular component movement;cellular homeostasis;metabolic process;regulation of biological process;response to stimulus;transport	cytoplasm;cytoskeleton;cytosol;endosome;membrane;mitochondrion;nucleus	catalytic activity;motor activity;nucleotide binding;protein binding;RNA binding;transporter activity		0		1.15598e+07	1.23234e+07	1.16117e+07	1.07444e+07		-0.0858263	-0.197826	0.112		0.146628	0.373517	0.714337
High	D3ZAA9	85275	ENSRNOG00000059683.1	Mpp2	MAGUK p55 subfamily member 2 [OS=Rattus norvegicus]	0	43	14	587	14	1	552	61.5	2431.2	14	[GO:0005515]; GO:0005488; GO:0003674 [GO:0005737]; GO:0044424; GO:0005622; GO:0044464; GO:0005575; GO:0005623 [GO:0005856]; GO:0043232; GO:0043228; GO:0043229; GO:0043226; GO:0044424; GO:0005575; GO:0005622; GO:0044464; GO:0005623 [GO:0005886]; GO:0016020; GO:0044464; GO:0071944; GO:0005575; GO:0005623 [GO:0014069]; GO:0032279; GO:0097458; GO:0099572; GO:0098984; GO:0044464; GO:0043226; GO:004445…	cell organization and biogenesis;regulation of biological process	cytoplasm;cytoskeleton;membrane	protein binding		0		1.14144e+07	1.13381e+07	1.20926e+07	1.08123e+07		0.0929456	-0.0685088	0.161454		1.32742	0.470667	1.69094
High	Q05683	24380	ENSRNOG00000018200.4	Gad2	Glutamate decarboxylase 2 [OS=Rattus norvegicus]	0	47	15	763	15	1	585	65.4	3659.1	15	[GO:0000139]; GO:0044431; GO:0098588; GO:0098791; GO:0005794; GO:0044444; GO:0044446; GO:0031090; GO:0031984; GO:0012505; GO:0043231; GO:0005737; GO:0044424; GO:0043229; GO:0044422; GO:0016020; GO:0043227; GO:0044464; GO:0005622; GO:0043226; GO:0005575; GO:0005623 [GO:0003824]; GO:0003674 [GO:0004351]; GO:0016831; GO:0016830; GO:0016829; GO:0003824; GO:0003674 [GO:0005737]; GO:0044424; GO:0005622…	cell communication;metabolic process;response to stimulus	cytoplasm;cytosol;Golgi;membrane	catalytic activity;protein binding	rno04940; rno00650; rno01100; rno04727; rno00250; rno00430; rno00410	0		1.14061e+07	1.10831e+07	1.18243e+07	1.13109e+07		0.0934001	0.0293498	0.0640504		1.38908	0.234557	0.651535
Low	P33578	64368		Prl8a7	Prolactin-8A7 [OS=Rattus norvegicus]	0.179	6	1	4	1	1	240	27.3	13.28	1	[GO:0005179]; GO:0048018; GO:0005102; GO:0030545; GO:0005515; GO:0098772; GO:0005488; GO:0003674 [GO:0005576]; GO:0005575 [GO:0010469]; GO:0009966; GO:0065009; GO:0007165; GO:0010646; GO:0023051; GO:0048583; GO:0065007; GO:0007154; GO:0009987; GO:0023052; GO:0050794; GO:0051716; GO:0050789; GO:0050896; GO:0008150	regulation of biological process	extracellular	protein binding		0		1.13787e+07	1.15386e+07	1.15119e+07	1.10855e+07		-0.00333265	-0.0577889	0.0544562		0.0127219	0.304932	0.261177
High	P14668	25673		Anxa5	annexin A5 [OS=Rattus norvegicus]	0	51	13	399	8	1	319	35.7	1818.28	13	[GO:0005388]; GO:0015085; GO:0015662; GO:0019829; GO:0046873; GO:0072509; GO:0042625; GO:0008324; GO:0022890; GO:0022853; GO:0042626; GO:0015075; GO:0022804; GO:0015405; GO:0016820; GO:0043492; GO:0022891; GO:0022857; GO:0015399; GO:0016817; GO:0042623; GO:0022892; GO:0005215; GO:0016787; GO:0016887; GO:0003674; GO:0003824; GO:0017111; GO:0016462; GO:0016818 [GO:0005509]; GO:0046872; GO:0043169; …	cell organization and biogenesis;coagulation;regulation of biological process;response to stimulus;transport	cytoplasm;cytosol;endoplasmic reticulum;membrane;nucleus	catalytic activity;metal ion binding;protein binding;transporter activity		5		1.13477e+07	1.15134e+07	1.13226e+07	1.12071e+07		-0.0241066	-0.0389073	0.0148007		0.119121	0.149178	0.05174
High	Q64542-2	29600	ENSRNOG00000003031.7	Atp2b4	Isoform XA of Plasma membrane calcium-transporting ATPase 4 [OS=Rattus norvegicus]	0	34	25	1343	16	1	1169	128.7	6325.68	25	[GO:0000166]; GO:0036094; GO:1901265; GO:0005488; GO:0097159; GO:1901363; GO:0003674 [GO:0003407]; GO:0048856; GO:0060041; GO:0032502; GO:0043010; GO:0008150; GO:0001654; GO:0007423; GO:0048513; GO:0048731; GO:0007275; GO:0032501 [GO:0005388]; GO:0015085; GO:0015662; GO:0019829; GO:0046873; GO:0072509; GO:0042625; GO:0008324; GO:0022890; GO:0022853; GO:0042626; GO:0015075; GO:0022804; GO:0015405;…	cellular component movement;cellular homeostasis;regulation of biological process;response to stimulus;transport	membrane	catalytic activity;enzyme regulator activity;metal ion binding;nucleotide binding;protein binding;transporter activity	rno04972; rno04020; rno04261; rno04024; rno04970; rno04022	0		1.11698e+07	1.11431e+07	9.86036e+06	1.25059e+07		-0.176435	0.16646	-0.342895		0.567851	0.488697	1.12713
High	Q01205	299201		Dlst	Dihydrolipoyllysine-residue succinyltransferase component of 2-oxoglutarate dehydrogenase complex, mitochondrial [OS=Rattus norvegicus]	0	32	8	390	8	1	454	48.9	1796.61	8	[GO:0004149]; GO:0016751; GO:0140096; GO:0016417; GO:0016748; GO:0003824; GO:0016747; GO:0003674; GO:0016746; GO:0016740 [GO:0005634]; GO:0043231; GO:0043227; GO:0043229; GO:0043226; GO:0044424; GO:0005575; GO:0005622; GO:0044464; GO:0005623 [GO:0005739]; GO:0043231; GO:0044444; GO:0043227; GO:0043229; GO:0005737; GO:0044424; GO:0043226; GO:0005622; GO:0044464; GO:0005575; GO:0005623 [GO:0005886]…	metabolic process	membrane;mitochondrion;nucleus	catalytic activity;protein binding	rno00310; rno00020; rno01100; rno01200	0		1.10893e+07	1.1243e+07	1.08521e+07	1.11728e+07		-0.0510563	-0.00903533	-0.042021		0.130999	0.0232127	0.11373
High	P70600-1	50646	ENSRNOG00000027839.6	Ptk2b	Protein-tyrosine kinase 2-beta [OS=Rattus norvegicus]	0	33	21	619	21	1	1009	115.7	2706.04	21	(content is truncated) [GO:0000165]; GO:0023014; GO:0035556; GO:0006468; GO:0007165; GO:0006464; GO:0016310; GO:0007154; GO:0009987; GO:0023052; GO:0050794; GO:0051716; GO:0036211; GO:0044267; GO:0006796; GO:0008150; GO:0050789; GO:0050896; GO:0019538; GO:0043412; GO:0044260; GO:0006793; GO:0065007; GO:0043170; GO:0044238; GO:1901564; GO:0044237; GO:0071704; GO:0008152; GO:0006807 [GO:0000166]; G…	cell differentiation;cell organization and biogenesis;cell proliferation;cellular component movement;cellular homeostasis;defense response;metabolic process;regulation of biological process;response to stimulus	cytoplasm;cytoskeleton;membrane;nucleus	catalytic activity;nucleotide binding;protein binding;receptor activity;signal transducer activity;transporter activity	rno04912; rno04020; rno05161; rno04650; rno04670; rno04062; rno04072	0		1.1081e+07	1.11376e+07	1.17683e+07	1.03371e+07		0.0794678	-0.107615	0.187083		0.640252	0.676206	1.37905
High	P62716	24673	ENSRNOG00000015182.6	Ppp2cb	serine/threonine-protein phosphatase 2A catalytic subunit beta isoform [OS=Rattus norvegicus]	0.005	47	8	260	1	1	309	35.6	1213.12	8	[GO:0000159]; GO:0008287; GO:0044424; GO:0044464; GO:1903293; GO:0005622; GO:0005575; GO:0005623; GO:1902494; GO:0032991 [GO:0000775]; GO:0098687; GO:0044427; GO:0005694; GO:0044446; GO:0043232; GO:0043229; GO:0044422; GO:0044424; GO:0043228; GO:0043226; GO:0005575; GO:0005622; GO:0044464; GO:0005623 [GO:0000922]; GO:0005819; GO:0044430; GO:0015630; GO:0043232; GO:0005856; GO:0044446; GO:0043228;…	cell organization and biogenesis;metabolic process;regulation of biological process;response to stimulus	chromosome;cytoplasm;cytoskeleton;nucleus	catalytic activity;metal ion binding;protein binding	rno04530; rno04071; rno04261; rno03015; rno05142; rno05160; rno04151; rno04350; rno04152; rno04114; rno04730; rno04728; rno04390	7		1.10003e+07	1.10229e+07	1.08786e+07	1.10995e+07		-0.0190128	0.00998696	-0.0289997		0.183045	0.0900852	0.288181
High	P41123	81765; 100359922	ENSRNOG00000015335.6	Rpl13; LOC100359922	60S ribosomal protein L13 [OS=Rattus norvegicus]	0.004	27	6	243	6	1	211	24.3	907.61	6	[GO:0003674] [GO:0003723]; GO:0003676; GO:0097159; GO:1901363; GO:0005488; GO:0003674 [GO:0003735]; GO:0005198; GO:0003674 [GO:0005622]; GO:0044464; GO:0005575; GO:0005623 [GO:0005634]; GO:0043231; GO:0043227; GO:0043229; GO:0043226; GO:0044424; GO:0005575; GO:0005622; GO:0044464; GO:0005623 [GO:0005840]; GO:0030529; GO:0043232; GO:0044444; GO:0044424; GO:1990904; GO:0043228; GO:0043229; GO:00057…	metabolic process	membrane;nucleus;ribosome	RNA binding;structural molecule activity	rno03010	0		1.09245e+07	1.08793e+07	1.08536e+07	1.10405e+07		-0.00340587	0.021228	-0.0246339		0.0140184	0.0757075	0.099256
High	P16638	24159		Acly	ATP-citrate synthase [OS=Rattus norvegicus]	0	28	22	719	22	1	1100	120.6	3075.34	22	[GO:0000166]; GO:0036094; GO:1901265; GO:0005488; GO:0097159; GO:1901363; GO:0003674 [GO:0003824]; GO:0003674 [GO:0003878]; GO:0046912; GO:0016746; GO:0016740; GO:0003824; GO:0003674 [GO:0005524]; GO:0032559; GO:0035639; GO:0030554; GO:0032555; GO:0043168; GO:1901265; GO:0017076; GO:0032553; GO:0043167; GO:0097159; GO:1901363; GO:0000166; GO:0097367; GO:0005488; GO:0036094; GO:0003674 [GO:0005654…	metabolic process	cytoplasm;cytosol;membrane;mitochondrion	catalytic activity;metal ion binding;nucleotide binding	rno00020; rno01100	0		1.09182e+07	1.08366e+07	1.03277e+07	1.15902e+07		-0.0693993	0.0969943	-0.166394		0.632388	0.845268	2.26369
High	Q80Z30	360593	ENSRNOG00000024730.1	Ppm1e	Protein phosphatase 1E [OS=Rattus norvegicus]	0	21	11	416	11	1	750	83.4	1814.19	11	[GO:0003824]; GO:0003674 [GO:0004721]; GO:0016791; GO:0140096; GO:0042578; GO:0003824; GO:0016788; GO:0003674; GO:0016787 [GO:0004722]; GO:0004721; GO:0016791; GO:0140096; GO:0042578; GO:0003824; GO:0016788; GO:0003674; GO:0016787 [GO:0005515]; GO:0005488; GO:0003674 [GO:0005634]; GO:0043231; GO:0043227; GO:0043229; GO:0043226; GO:0044424; GO:0005575; GO:0005622; GO:0044464; GO:0005623 [GO:000573…	metabolic process;regulation of biological process;response to stimulus	cytoplasm;mitochondrion;nucleus	catalytic activity;metal ion binding;protein binding		0		1.07684e+07	1.0769e+07	1.05782e+07	1.09581e+07		-0.0257934	0.0251139	-0.0509073		0.169503	0.139768	0.282709
[truncated: 3,215 more rows]
