# Supplementary material for: Noninvasive Brain Stimulation Enhances Memory Acquisition and Is Associated with Synaptoneurosome Modification in the Rat Hippocampus
Source: eNeuro. 2019 Dec 3;6(6):ENEURO.0311-19.2019. doi: 10.1523/ENEURO.0311-19.2019 (PMC6900464; doi:10.1523/ENEURO.0311-19.2019)
Supplement: Extended Data Figure 3-2 — IPA diseases or functions annotation for the comparison between acquisition and sham groups Download Figure 3-2, XLSX file. [file sup_enu-eN-NWR-0311-19-s09.xlsx]

## Sheet: Acqusition vs. Sham
© 2000-2018 QIAGEN. All rights reserved.
Categories	Diseases or Functions Annotation	p-Value	Predicted Activation State	Activation z-score	Flags	Molecules	# Molecules
Amino Acid Metabolism, Small Molecule Biochemistry	Catabolism of amino acids	9.33e-06				ALDH6A1,CSAD,FAH,GSTZ1,IVD,MCCC1,MCCC2,PCYOX1	8
Amino Acid Metabolism, Small Molecule Biochemistry	Catabolism of leucine	1.35e-05				IVD,MCCC1,MCCC2	3
Amino Acid Metabolism, Small Molecule Biochemistry	Catabolism of branched chain amino acids	2.3e-05				ALDH6A1,IVD,MCCC1,MCCC2	4
Amino Acid Metabolism, Small Molecule Biochemistry	Catabolism of neutral amino acid	2.3e-05				ALDH6A1,IVD,MCCC1,MCCC2	4
Amino Acid Metabolism, Small Molecule Biochemistry	Metabolism of amino acids	3.22e-05				ALDH6A1,CSAD,FAH,GAD2,GCLM,GSTZ1,IVD,MCCC1,MCCC2,PARK7,PCYOX1,QDPR	12
Amino Acid Metabolism, Small Molecule Biochemistry	Metabolism of L-cysteine	6.6e-05				CSAD,GCLM,PCYOX1	3
Amino Acid Metabolism, Small Molecule Biochemistry	Release of amino acids	0.000159	Increased	2.037		ADGRL1,GAD2,GIT1,GRM7,GSN,HOMER1,SYN1,TRPV1	8
Amino Acid Metabolism, Small Molecule Biochemistry	Release of glutamine family amino acid	0.000225		1.813		ADGRL1,GIT1,GRM7,GSN,HOMER1,SYN1,TRPV1	7
Auditory and Vestibular System Development and Function, Nervous System Development and Function	Hearing	0.000409		1	bias	ABHD12,CACNA1D,COL2A1,DNAJC5,FOS,FZD4,GABRB2,GRM7,KCNMA1,PRKAA1	10
Behavior	Behavior	7.28e-17		-0.039		ABHD12,ACPP,ADGRL1,AOC3,ARHGEF11,ARHGEF6,ARHGEF9,ARL6IP5,ATAT1,CACNA2D2,CACNA2D3,CACNB3,CANX,CC2D1A,CTNNB1,DLG3,DLG4,DLGAP3,DNAJC5,DUSP1,ERC2,FKBP8,FOS,GABRA1,GABRG2,GAD2,GIT1,Gk,GPD2,GPHN,GPRASP1,GRIA1,GRIA2,GRID2,GRIN1,GRIN2B,GRM7,HOMER1,HSPA1A/HSPA1B,KCNMA1,MAOA,MARK2,NAMPT,NCDN,NLGN1,NLGN2,NPTX1,NTRK3,PARK7,PER1,PGRMC1,PIP5K1C,PPP1R9B,PTPRN2,REN,RIMS1,SHANK1,SHANK2,SHANK3,SPTBN2,SRCIN1,SYN1,S…	69
Behavior	Conditioning	4.51e-13	Increased	2.284	bias	CACNB3,DBN1,GABRA1,GABRG2,GAD2,GIT1,GRIA1,GRIA2,GRID2,GRIN1,GRIN2B,GRM7,HOMER1,KCNMA1,NAMPT,PER1,PPP1R9B,SHANK1,SHANK3,SYN1,SYNGAP1,TMEM35A,TRPV1,TSC1,VDAC1	25
Behavior	Emotional behavior	7.93e-12		-1.821		ADGRL1,CTNNB1,DLG4,DLGAP3,GABRA1,GABRG2,GAD2,GIT1,GRIA1,GRIA2,GRIN1,GRIN2B,GRM7,HOMER1,HSPA1A/HSPA1B,MAOA,PPP1R9B,PTPRN2,RIMS1,SHANK1,SHANK2,SHANK3,SYN1,TMEM35A,TRPV1,TSC1,VDAC1	27
Behavior	Anxiety	1.1e-11		-1.293		ARHGEF9,CTNNB1,DLG4,DLGAP3,DUSP1,FOS,GABRG2,GAD2,GIT1,GRIA1,GRIN2B,HOMER1,KCNJ6,NAMPT,PTPRN2,SHANK1,SHANK2,SHANK3,SYNGAP1,TMEM35A,TRPV1,TSC1,VAMP7	23
Behavior	Learning	5.19e-10	Increased	2.764		ARHGEF9,ARL6IP5,CACNB3,DLG3,DLG4,FOS,GABRA1,GABRG2,GRIA1,GRIA2,GRID2,GRIN1,GRIN2B,GRM7,HOMER1,MAOA,NAMPT,NCDN,NLGN1,NTRK3,PARK7,PGRMC1,PTPRN2,SHANK1,SHANK2,SHANK3,SRCIN1,SYNGAP1,SYNJ1,TMEM35A,TSC1,VDAC1	32
Behavior	Cognition	1.39e-09	Increased	2.924		ANK3,ARHGEF9,ARL6IP5,CACNB3,DLG3,DLG4,FOS,GABRA1,GABRG2,GRIA1,GRIA2,GRID2,GRIN1,GRIN2B,GRM7,HOMER1,MAOA,NAMPT,NCDN,NLGN1,NTRK3,PARK7,PGRMC1,PTPRN2,SHANK1,SHANK2,SHANK3,SRCIN1,SYNGAP1,SYNJ1,TMEM35A,TSC1,VDAC1	33
Behavior	Locomotion	3.21e-08		-0.71		ABHD12,ATP2A2,CANX,DLG3,DLG4,DUSP1,FZD4,GABRA1,GAD2,GRIA1,GRIA2,GRID2,GRIN1,HOMER1,HSPA1A/HSPA1B,KCNJ6,KCNMA1,NAMPT,NFKBIA,PARK7,RIMS1,SHANK3,TMOD1,TRPV1,TSC1	25
Behavior	Habituation	3.68e-07	Increased	2.236	bias	GABRG2,GRIN1,HOMER1,NAMPT,SHANK1,TSC1	6
Behavior	Social behavior	1.79e-06		0.152		CTNNB1,DLG4,GRIA2,GRIN1,NLGN1,NLGN2,RIMS1,SHANK1,SHANK2,SHANK3,SYNGAP1	11
Behavior	Associative learning	4.32e-05				GRIA1,GRIN1,GRIN2B,GRM7,PGRMC1,SHANK1	6
Behavior	Motor learning	5.62e-05				ARL6IP5,GABRA1,GRID2,PARK7,SHANK3,SRCIN1	6
Behavior	Grooming	0.000107		-1.762		DLG4,DLGAP3,GABRA1,GRIA2,HSPA1A/HSPA1B,SHANK2,SHANK3	7
Behavior	Vertical rearing	0.000182		-0.478		DLG4,GPRASP1,GRIA1,GRID2,NAMPT,PARK7,PER1,SHANK3	8
Behavior	Exploratory behavior	0.000208		0.054		ARHGEF9,ERC2,GRIA1,GRIA2,RIMS1,SHANK2,SHANK3,SYNGAP1	8
Behavior	Abnormal initiation of locomotion	0.000215				ATP2A2,DLG3,DUSP1,GABRA1,GRID2,PARK7	6
Behavior	Contextual conditioning	0.000236		0		CACNB3,GIT1,GRIA1,GRM7,SHANK3,TMEM35A,TRPV1,VDAC1	8
Behavior	Thigmotaxis	0.000254	Decreased	-2	bias	ARHGEF9,ATAT1,DLGAP3,NLGN2,SHANK3	5
Behavior	Aversive behavior	0.000366				GABRA1,GAD2,GRM7,PPP1R9B,TRPV1	5
Behavior	Cued conditioning	0.000407		1.342	bias	DBN1,GIT1,SYNGAP1,TMEM35A,TRPV1,VDAC1	6
Behavior, Digestive System Development and Function	Suckling	0.000325				FKBP8,Gk,GPHN,GRIN1,GRIN2B,SYNGAP1,TGM1	7
Behavior, Digestive System Development and Function	Feeding	0.000364				AOC3,CACNA2D2,DUSP1,FKBP8,GABRG2,GAD2,Gk,GPD2,GPHN,GRIN1,GRIN2B,MARK2,PER1,SYNGAP1,TGM1,TRPV1	16
Behavior, Nervous System Development and Function	Memory	3.05e-05	Increased	2.621		ARL6IP5,CACNB3,GRIA1,GRIA2,GRIN1,GRIN2B,GRM7,HOMER1,NAMPT,NTRK3,PGRMC1,SHANK1,SHANK2,SHANK3,SRCIN1,SYNGAP1,TMEM35A	17
Behavior, Nervous System Development and Function	Spatial memory	0.000121				ARL6IP5,GRIA1,GRIA2,GRM7,HOMER1,NAMPT,SHANK1,SYNGAP1,TMEM35A	9
Behavior, Reproductive System Development and Function	Nurture	0.000254				ADGRL1,GABRA1,GRIN1,RIMS1,SHANK1	5
Cancer, Dermatological Diseases and Conditions, Organismal Injury and Abnormalities	Skin carcinoma	4.29e-05				ANK3,ANKS1B,AOC3,APOB,BSN,C19orf44,CACNA1D,CACNA2D1,CDH2,CDH8,CPNE7,CTNNB1,DAGLA,DGKG,DLGAP1,DLGAP2,DNAH7,ENPP7,ERICH6,FOS,GABRA1,GABRB2,GRIA2,GRID2,GRIN2B,GRIN3A,KCNA6,KCNMA1,KCNQ2,KCNQ3,KCNT2,KRT73,MAGI2,MARK2,MIIP,MPP2,NLGN1,NTRK3,PCLO,PGRMC1,RAB3GAP2,RIMS1,RYR2,SH3GL2,SHANK1,SHANK2,SPTAN1,SRP54,TSC1,TUBB4B	50
Cancer, Dermatological Diseases and Conditions, Organismal Injury and Abnormalities	Skin squamous cell carcinoma	0.000104				ANK3,ANKS1B,APOB,BSN,CACNA1D,CDH2,CPNE7,CTNNB1,DAGLA,DLGAP1,DLGAP2,DNAH7,ENPP7,ERICH6,FOS,GRIN2B,GRIN3A,KCNA6,KCNMA1,KCNQ3,KRT73,MAGI2,MARK2,MIIP,MPP2,NTRK3,PCLO,RAB3GAP2,RIMS1,RYR2,SHANK1,SHANK2,SPTAN1,TUBB4B	34
Cancer, Endocrine System Disorders, Gastrointestinal Disease, Organismal Injury and Abnormalities	Pancreatic cancer	4.12e-05				ARHGEF6,ARHGEF7,C19orf44,CACNA1D,CCDC116,CDH2,CDH8,CDKN2AIP,COL2A1,CPNE7,CRP,CTBP1,CTNNB1,CUL5,DGKB,DGKG,DLGAP1,DLGAP3,DNAH7,DNM1L,DPYSL5,ELAC2,ERC2,EXOC6,FOS,GABRA1,GABRB2,GABRG2,GHITM,GOLPH3L,GPRASP1,GRID2,GRIN3A,GSTP1,GUCY1A2,HADHA,KATNA1,KCNA6,KCNQ2,KCNQ3,LRRC4B,MADD,MAGI2,MCCC1,MCCC2,MPP4,MPPED2,NBN,NINJ1,NLGN1,NLGN2,NPTX1,PAM,PCLO,PLEC,PTPRS,RAB3GAP2,RASGRF2,RIMBP2,RIMS1,RYR2,SFXN1,SHANK2,S…	77
Cancer, Endocrine System Disorders, Gastrointestinal Disease, Organismal Injury and Abnormalities	Pancreatic tumor	8.85e-05				APOB,ARHGEF6,ARHGEF7,C19orf44,CACNA1D,CCDC116,CDH2,CDH8,CDKN2AIP,COL2A1,CPNE7,CRP,CTBP1,CTNNB1,CUL5,DGKB,DGKG,DLGAP1,DLGAP3,DNAH7,DNM1L,DPYSL5,ELAC2,ERC2,EXOC6,FOS,GABRA1,GABRB2,GABRG2,GHITM,GOLPH3L,GPRASP1,GRIA1,GRID2,GRIN3A,GSTP1,GUCY1A2,HADHA,KATNA1,KCNA6,KCNQ2,KCNQ3,LRRC4B,MADD,MAGI2,MCCC1,MCCC2,MPP4,MPPED2,NBN,NINJ1,NLGN1,NLGN2,NPTX1,PAM,PCLO,PLEC,PRDX1,PTPRS,RAB3GAP2,RASGRF2,RIMBP2,RIMS1,RY…	85
Cancer, Endocrine System Disorders, Gastrointestinal Disease, Organismal Injury and Abnormalities	Pancreatic ductal adenocarcinoma	0.000108				ARHGEF6,ARHGEF7,C19orf44,CACNA1D,CCDC116,CDH2,CDH8,CDKN2AIP,COL2A1,CPNE7,CRP,CTBP1,CTNNB1,CUL5,DGKB,DGKG,DLGAP1,DLGAP3,DNAH7,DNM1L,DPYSL5,ELAC2,ERC2,EXOC6,GABRA1,GHITM,GOLPH3L,GPRASP1,GRID2,GUCY1A2,HADHA,KATNA1,KCNA6,KCNQ2,KCNQ3,LRRC4B,MADD,MAGI2,MCCC1,MCCC2,MPP4,MPPED2,NBN,NINJ1,NLGN1,NLGN2,PAM,PCLO,PLEC,PTPRS,RAB3GAP2,RIMBP2,RIMS1,RYR2,SFXN1,SHANK2,SHANK3,SHROOM2,SIPA1L1,SPTAN1,SRP54,STK39,SYN1…	70
Cancer, Endocrine System Disorders, Gastrointestinal Disease, Organismal Injury and Abnormalities	Pancreatic carcinoma	0.000165				ARHGEF6,ARHGEF7,C19orf44,CACNA1D,CCDC116,CDH2,CDH8,CDKN2AIP,COL2A1,CPNE7,CRP,CTBP1,CTNNB1,CUL5,DGKB,DGKG,DLGAP1,DLGAP3,DNAH7,DNM1L,DPYSL5,ELAC2,ERC2,EXOC6,GABRA1,GHITM,GOLPH3L,GPRASP1,GRID2,GSTP1,GUCY1A2,HADHA,KATNA1,KCNA6,KCNQ2,KCNQ3,LRRC4B,MADD,MAGI2,MCCC1,MCCC2,MPP4,MPPED2,NBN,NINJ1,NLGN1,NLGN2,PAM,PCLO,PLEC,PTPRS,RAB3GAP2,RIMBP2,RIMS1,RYR2,SFXN1,SHANK2,SHANK3,SHROOM2,SIPA1L1,SPTAN1,SRP54,STK3…	71
Cancer, Gastrointestinal Disease, Hepatic System Disease, Organismal Injury and Abnormalities	Benign neoplasm of liver	0.000325				CRP,CTNNB1,FAH,NBN,TSC1	5
Cancer, Gastrointestinal Disease, Organismal Injury and Abnormalities	Gastrointestinal tract cancer	1.98e-07				ABLIM2,ACPP,ACSL4,ADCY6,AK3,ALCAM,ALDH6A1,ANK3,ANKS1B,ANXA4,AOC3,APMAP,APOB,ARHGAP27,ARHGEF11,ARHGEF6,ARHGEF7,ARL5A,ARMC10,ATAT1,ATL1,ATP2A2,ATP5F1C,ATP5PB,ATP6AP1,ATRN,BEGAIN,BSN,C19orf44,C5orf34,CACNA1D,CACNA2D1,CACNA2D2,CACNA2D3,CACNB3,CAMK2D,CANX,CASK,CC2D1A,CCDC116,CD82,CD9,CDH2,CDH8,CDKN2AIP,CLIC4,CLUL1,CNIH2,COL2A1,COL3A1,COPS8,CPNE7,CRELD1,CRP,CRYZ,CTBP1,CTNNB1,CUL5,CYB5R1,DAGLA,DCXR,DGKB…	249
Cancer, Gastrointestinal Disease, Organismal Injury and Abnormalities	Gastrointestinal tumor	2.69e-07		0		ABLIM2,ACPP,ACSL4,ADCY6,AK3,ALCAM,ALDH6A1,ANK3,ANKS1B,ANXA4,AOC3,APMAP,APOB,ARHGAP27,ARHGEF11,ARHGEF6,ARHGEF7,ARHGEF9,ARL5A,ARMC10,ATAT1,ATL1,ATP2A2,ATP5F1C,ATP5PB,ATP6AP1,ATRN,BEGAIN,BSN,C19orf44,C5orf34,CACNA1D,CACNA2D1,CACNA2D2,CACNA2D3,CACNB3,CAMK2D,CANX,CASK,CC2D1A,CCDC116,CD82,CD9,CDH2,CDH8,CDKN2AIP,CLIC4,CLUL1,CNIH2,COL2A1,COL3A1,COPS8,CPNE7,CRELD1,CRP,CRYZ,CTBP1,CTNNB1,CUL5,CYB5R1,DAGLA,D…	252
Cancer, Gastrointestinal Disease, Organismal Injury and Abnormalities	Malignant neoplasm of large intestine	3.48e-07				ABLIM2,ACPP,ACSL4,ADCY6,AK3,ALCAM,ALDH6A1,ANK3,ANKS1B,ANXA4,AOC3,APMAP,APOB,ARHGAP27,ARHGEF11,ARHGEF6,ARHGEF7,ARL5A,ARMC10,ATAT1,ATL1,ATP2A2,ATP5PB,ATP6AP1,ATRN,BEGAIN,BSN,C19orf44,C5orf34,CACNA1D,CACNA2D1,CACNA2D2,CACNA2D3,CACNB3,CAMK2D,CANX,CASK,CC2D1A,CCDC116,CD82,CD9,CDH2,CDH8,CDKN2AIP,CLIC4,CLUL1,CNIH2,COL2A1,COL3A1,COPS8,CPNE7,CRELD1,CRP,CRYZ,CTBP1,CTNNB1,CUL5,CYB5R1,DAGLA,DCXR,DGKB,DGKG,DL…	242
Cancer, Gastrointestinal Disease, Organismal Injury and Abnormalities	Colon tumor	7.81e-07				ABLIM2,ACPP,AK3,ALDH6A1,ANK3,ANXA4,AOC3,APOB,ARHGEF11,ARHGEF6,ARHGEF7,ARMC10,ATAT1,ATP2A2,ATP6AP1,ATRN,BEGAIN,CACNA1D,CACNA2D1,CACNB3,CANX,CASK,CC2D1A,CD82,CDH2,CDH8,COL2A1,COL3A1,COPS8,CPNE7,CRELD1,CRP,CTBP1,CTNNB1,CUL5,CYB5R1,DCXR,DGKB,DGKG,DLG3,DLG4,DLGAP1,DLGAP2,DLGAP3,DNAH7,DUSP1,EIF3J,ELAC2,ENPP7,ERC2,FAH,FKBP8,FNTB,FZD4,GAD2,GCLM,GFM2,GORASP2,GRIA1,GRIN1,GRIN3A,GRM7,GSN,GSTP1,GSTZ1,HACE1,H…	141
Cancer, Gastrointestinal Disease, Organismal Injury and Abnormalities	Gastrointestinal adenocarcinoma	8.96e-07				ABLIM2,ACPP,ACSL4,ADCY6,AK3,ALCAM,ALDH6A1,ANK3,ANKS1B,ANXA4,AOC3,APMAP,APOB,ARHGAP27,ARHGEF11,ARHGEF6,ARHGEF7,ARL5A,ARMC10,ATAT1,ATL1,ATP2A2,ATP5PB,ATP6AP1,ATRN,BEGAIN,BSN,C19orf44,C5orf34,CACNA1D,CACNA2D1,CACNA2D2,CACNA2D3,CACNB3,CAMK2D,CANX,CASK,CC2D1A,CCDC116,CD82,CDH2,CDH8,CDKN2AIP,CLIC4,CLUL1,CNIH2,COL2A1,COL3A1,COPS8,CPNE7,CTBP1,CTNNB1,CUL5,CYB5R1,DAGLA,DCXR,DGKB,DGKG,DLG3,DLG4,DLGAP1,DLGAP…	235
Cancer, Gastrointestinal Disease, Organismal Injury and Abnormalities	Intestinal carcinoma	9.82e-07				ABLIM2,ACPP,ACSL4,ADCY6,AK3,ALCAM,ALDH6A1,ANK3,ANKS1B,ANXA4,AOC3,APMAP,APOB,ARHGAP27,ARHGEF11,ARHGEF6,ARHGEF7,ARL5A,ARMC10,ATAT1,ATL1,ATP2A2,ATP5PB,ATP6AP1,ATRN,BEGAIN,BSN,C19orf44,C5orf34,CACNA1D,CACNA2D1,CACNA2D2,CACNA2D3,CACNB3,CAMK2D,CANX,CASK,CC2D1A,CCDC116,CD82,CDH2,CDH8,CDKN2AIP,CLIC4,CLUL1,CNIH2,COL2A1,COL3A1,COPS8,CPNE7,CTBP1,CTNNB1,CUL5,CYB5R1,DAGLA,DCXR,DGKB,DGKG,DLG3,DLG4,DLGAP1,DLGAP…	232
Cancer, Gastrointestinal Disease, Organismal Injury and Abnormalities	Colon cancer	1.3e-06				ABLIM2,ACPP,AK3,ALDH6A1,ANK3,ANXA4,AOC3,APOB,ARHGEF11,ARHGEF6,ARHGEF7,ARMC10,ATAT1,ATP2A2,ATP6AP1,ATRN,BEGAIN,CACNA1D,CACNA2D1,CACNB3,CANX,CASK,CC2D1A,CD82,CDH2,CDH8,COL2A1,COL3A1,COPS8,CRELD1,CRP,CTBP1,CTNNB1,CUL5,CYB5R1,DCXR,DGKB,DGKG,DLG3,DLG4,DLGAP1,DLGAP2,DLGAP3,DNAH7,DUSP1,EIF3J,ELAC2,ENPP7,ERC2,FAH,FKBP8,FNTB,FZD4,GAD2,GCLM,GFM2,GORASP2,GRIA1,GRIN1,GRIN3A,GRM7,GSN,GSTP1,GSTZ1,HACE1,HADHA,H…	139
Cancer, Gastrointestinal Disease, Organismal Injury and Abnormalities	Large intestine adenocarcinoma	1.37e-06				ABLIM2,ACPP,ACSL4,ADCY6,AK3,ALCAM,ALDH6A1,ANK3,ANKS1B,ANXA4,AOC3,APMAP,APOB,ARHGAP27,ARHGEF11,ARHGEF6,ARHGEF7,ARL5A,ARMC10,ATAT1,ATL1,ATP2A2,ATP5PB,ATP6AP1,ATRN,BEGAIN,BSN,C19orf44,C5orf34,CACNA1D,CACNA2D1,CACNA2D2,CACNA2D3,CACNB3,CAMK2D,CANX,CASK,CC2D1A,CCDC116,CD82,CDH2,CDH8,CDKN2AIP,CLIC4,CLUL1,CNIH2,COL2A1,COL3A1,COPS8,CPNE7,CTBP1,CTNNB1,CUL5,CYB5R1,DAGLA,DCXR,DGKB,DGKG,DLG3,DLG4,DLGAP1,DLGAP…	230
Cancer, Gastrointestinal Disease, Organismal Injury and Abnormalities	Large intestine carcinoma	1.54e-06				ABLIM2,ACPP,ACSL4,ADCY6,AK3,ALCAM,ALDH6A1,ANK3,ANKS1B,ANXA4,AOC3,APMAP,APOB,ARHGAP27,ARHGEF11,ARHGEF6,ARHGEF7,ARL5A,ARMC10,ATAT1,ATL1,ATP2A2,ATP5PB,ATP6AP1,ATRN,BEGAIN,BSN,C19orf44,C5orf34,CACNA1D,CACNA2D1,CACNA2D2,CACNA2D3,CACNB3,CAMK2D,CANX,CASK,CC2D1A,CCDC116,CD82,CDH2,CDH8,CDKN2AIP,CLIC4,CLUL1,CNIH2,COL2A1,COL3A1,COPS8,CPNE7,CTBP1,CTNNB1,CUL5,CYB5R1,DAGLA,DCXR,DGKB,DGKG,DLG3,DLG4,DLGAP1,DLGAP…	231
Cancer, Gastrointestinal Disease, Organismal Injury and Abnormalities	Gastrointestinal carcinoma	1.64e-06				ABLIM2,ACPP,ACSL4,ADCY6,AK3,ALCAM,ALDH6A1,ANK3,ANKS1B,ANXA4,AOC3,APMAP,APOB,ARHGAP27,ARHGEF11,ARHGEF6,ARHGEF7,ARL5A,ARMC10,ATAT1,ATL1,ATP2A2,ATP5F1C,ATP5PB,ATP6AP1,ATRN,BEGAIN,BSN,C19orf44,C5orf34,CACNA1D,CACNA2D1,CACNA2D2,CACNA2D3,CACNB3,CAMK2D,CANX,CASK,CC2D1A,CCDC116,CD82,CDH2,CDH8,CDKN2AIP,CLIC4,CLUL1,CNIH2,COL2A1,COL3A1,COPS8,CPNE7,CTBP1,CTNNB1,CUL5,CYB5R1,DAGLA,DCXR,DGKB,DGKG,DLG3,DLG4,DLGA…	238
Cancer, Gastrointestinal Disease, Organismal Injury and Abnormalities	Digestive system cancer	1.65e-06		0.525		ABLIM2,ACPP,ACSL4,ADCY6,AK3,ALCAM,ALDH6A1,ALPP,ANK3,ANKS1B,ANXA4,AOC3,APMAP,APOB,ARHGAP27,ARHGEF11,ARHGEF6,ARHGEF7,ARHGEF9,ARL5A,ARMC10,ATAT1,ATL1,ATP2A2,ATP5F1C,ATP5PB,ATP6AP1,ATRN,BEGAIN,BSN,C19orf44,C5orf34,CACNA1D,CACNA2D1,CACNA2D2,CACNA2D3,CACNB3,CAMK2D,CANX,CASK,CC2D1A,CCDC116,CD82,CD9,CDH2,CDH8,CDKN2AIP,CLIC4,CLUL1,CNIH2,COL2A1,COL3A1,COPS8,CPNE7,CRELD1,CRP,CRYZ,CTBP1,CTNNB1,CUL5,CYB5R1,DA…	265
Cancer, Gastrointestinal Disease, Organismal Injury and Abnormalities	Colorectal tumor	2.25e-06				ABLIM2,ACPP,AK3,ALCAM,ALDH6A1,ANK3,ANXA4,AOC3,APOB,ARHGEF11,ARHGEF6,ARHGEF7,ARL5A,ARMC10,ATAT1,ATP2A2,ATP6AP1,ATRN,BEGAIN,CACNA1D,CACNA2D1,CACNB3,CANX,CASK,CC2D1A,CD82,CD9,CDH2,CDH8,COL2A1,COL3A1,COPS8,CPNE7,CRELD1,CRP,CRYZ,CTBP1,CTNNB1,CUL5,CYB5R1,DCXR,DGKB,DGKG,DLG3,DLG4,DLGAP1,DLGAP2,DLGAP3,DNAH7,DUSP1,EIF3J,ELAC2,ENPP7,ERC2,FAH,FKBP8,FNTB,FOS,FZD4,GAD2,GCLM,GFM2,GLTP,GORASP2,GRIA1,GRIN1,GRIN3…	155
Cancer, Gastrointestinal Disease, Organismal Injury and Abnormalities	Pancreatobiliary tumor	3.25e-06		0.152		ALPP,APOB,ARHGEF11,ARHGEF6,ARHGEF7,ARHGEF9,C19orf44,CACNA1D,CACNA2D1,CCDC116,CDH2,CDH8,CDKN2AIP,COL2A1,CPNE7,CRP,CTBP1,CTNNB1,CUL5,DGKB,DGKG,DLG3,DLGAP1,DLGAP2,DLGAP3,DNAH7,DNM1L,DPYSL5,ELAC2,ERC2,EXOC6,FOS,GABRA1,GABRB2,GABRG2,GHITM,GOLPH3L,GPHN,GPRASP1,GRIA1,GRID2,GRIN2B,GRIN3A,GSTP1,GUCY1A2,HADHA,IMMT,KATNA1,KCNA6,KCNQ2,KCNQ3,KLHL20,LRRC4B,MADD,MAGI2,MAOA,MARK2,MCCC1,MCCC2,MPP4,MPPED2,NBN,NINJ…	99
Cancer, Gastrointestinal Disease, Organismal Injury and Abnormalities	Colorectal cancer	3.96e-06				ABLIM2,ACPP,AK3,ALCAM,ALDH6A1,ANK3,ANXA4,AOC3,APOB,ARHGEF11,ARHGEF6,ARHGEF7,ARL5A,ARMC10,ATAT1,ATP2A2,ATP6AP1,ATRN,BEGAIN,CACNA1D,CACNA2D1,CACNB3,CANX,CASK,CC2D1A,CD82,CD9,CDH2,CDH8,COL2A1,COL3A1,COPS8,CRELD1,CRP,CRYZ,CTBP1,CTNNB1,CUL5,CYB5R1,DCXR,DGKB,DGKG,DLG3,DLG4,DLGAP1,DLGAP2,DLGAP3,DNAH7,DUSP1,EIF3J,ELAC2,ENPP7,ERC2,FAH,FKBP8,FNTB,FOS,FZD4,GAD2,GCLM,GFM2,GORASP2,GRIA1,GRIN1,GRIN3A,GRM7,GSN,…	152
Cancer, Gastrointestinal Disease, Organismal Injury and Abnormalities	Development of digestive organ tumor	7.34e-06		0.492		ABLIM2,ACPP,AK3,ALCAM,ALDH6A1,ANK3,ANXA4,AOC3,APOB,ARHGEF11,ARHGEF6,ARHGEF7,ARMC10,ATAT1,ATP2A2,ATP6AP1,ATRN,BEGAIN,BSN,CACNA1D,CACNA2D1,CACNB3,CANX,CASK,CC2D1A,CD82,CDH2,CDH8,COPS8,CTBP1,CTNNB1,CUL5,CYB5R1,DCXR,DGKB,DGKG,DLG3,DLG4,DLGAP1,DLGAP2,DLGAP3,DNAH7,DUSP1,EIF3J,ELAC2,ENPP7,EQTN,ERC2,FAH,FKBP8,FNTB,FOS,GAD2,GCLM,GFM2,GLTP,GORASP2,GPD2,GPRASP1,GRIA1,GRID2,GRIN1,GRIN3A,GRM7,GSTP1,GSTZ1,HACE…	150
Cancer, Gastrointestinal Disease, Organismal Injury and Abnormalities	Colon carcinoma	1.2e-05				ABLIM2,ACPP,AK3,ALDH6A1,ANK3,ANXA4,AOC3,APOB,ARHGEF11,ARHGEF6,ARHGEF7,ARMC10,ATAT1,ATP6AP1,ATRN,BEGAIN,CACNA1D,CACNA2D1,CACNB3,CANX,CASK,CC2D1A,CD82,CDH2,CDH8,COPS8,CTBP1,CTNNB1,CUL5,CYB5R1,DCXR,DGKB,DGKG,DLG3,DLG4,DLGAP1,DLGAP2,DLGAP3,DNAH7,DUSP1,EIF3J,ELAC2,ENPP7,ERC2,FAH,FKBP8,FNTB,GAD2,GCLM,GFM2,GORASP2,GRIA1,GRIN1,GRIN3A,GRM7,GSTP1,GSTZ1,HACE1,HADHA,HOMER1,IMMT,INHBA,JAM3,KATNA1,KCNA6,KCNH8,…	130
Cancer, Gastrointestinal Disease, Organismal Injury and Abnormalities	Digestive organ tumor	1.34e-05		0.131		ABLIM2,ACPP,ACSL4,ADCY6,AK3,ALCAM,ALDH6A1,ALPP,ANK3,ANKS1B,ANXA4,AOC3,APMAP,APOB,ARHGAP27,ARHGEF11,ARHGEF6,ARHGEF7,ARHGEF9,ARL5A,ARMC10,ATAT1,ATL1,ATP2A2,ATP5F1C,ATP5PB,ATP6AP1,ATRN,BEGAIN,BSN,C19orf44,C5orf34,CA3,CACNA1D,CACNA2D1,CACNA2D2,CACNA2D3,CACNB3,CAMK2D,CANX,CARHSP1,CASK,CC2D1A,CCDC116,CD82,CD9,CDH2,CDH8,CDKN2AIP,CLIC4,CLUL1,CNIH2,COL2A1,COL3A1,COPS8,CPNE7,CRELD1,CRP,CRYZ,CSAD,CTBP1,CTNN…	277
Cancer, Gastrointestinal Disease, Organismal Injury and Abnormalities	Colon adenocarcinoma	2.45e-05				ABLIM2,ACPP,AK3,ALDH6A1,ANK3,AOC3,APOB,ARHGEF11,ARHGEF6,ARHGEF7,ARMC10,ATAT1,ATP6AP1,ATRN,BEGAIN,CACNA1D,CACNA2D1,CACNB3,CANX,CASK,CC2D1A,CD82,CDH2,CDH8,COPS8,CTBP1,CTNNB1,CUL5,CYB5R1,DCXR,DGKB,DGKG,DLG3,DLG4,DLGAP1,DLGAP2,DLGAP3,DNAH7,DUSP1,EIF3J,ELAC2,ENPP7,ERC2,FAH,FKBP8,FNTB,GAD2,GCLM,GFM2,GORASP2,GRIA1,GRIN1,GRIN3A,GRM7,GSTZ1,HACE1,HADHA,HOMER1,IMMT,INHBA,JAM3,KATNA1,KCNA6,KCNH8,KCNMA1,KCNQ2…	127
Cancer, Gastrointestinal Disease, Organismal Injury and Abnormalities	Colorectal adenocarcinoma	3.81e-05				ABLIM2,ACPP,AK3,ALDH6A1,ANK3,AOC3,APOB,ARHGEF11,ARHGEF6,ARHGEF7,ARMC10,ATAT1,ATP6AP1,ATRN,BEGAIN,CACNA1D,CACNA2D1,CACNB3,CANX,CASK,CC2D1A,CD82,CDH2,CDH8,COPS8,CTBP1,CTNNB1,CUL5,CYB5R1,DCXR,DGKB,DGKG,DLG3,DLG4,DLGAP1,DLGAP2,DLGAP3,DNAH7,DUSP1,EIF3J,ELAC2,ENPP7,ERC2,FAH,FKBP8,FNTB,FOS,GAD2,GCLM,GFM2,GORASP2,GRIA1,GRIN1,GRIN3A,GRM7,GSTP1,GSTZ1,HACE1,HADHA,HOMER1,IMMT,INHBA,JAM3,KATNA1,KCNA6,KCNH8,KC…	130
Cancer, Gastrointestinal Disease, Organismal Injury and Abnormalities	Colorectal carcinoma	5.53e-05				ABLIM2,ACPP,AK3,ALDH6A1,ANK3,ANXA4,AOC3,APOB,ARHGEF11,ARHGEF6,ARHGEF7,ARMC10,ATAT1,ATP6AP1,ATRN,BEGAIN,CACNA1D,CACNA2D1,CACNB3,CANX,CASK,CC2D1A,CD82,CDH2,CDH8,COPS8,CTBP1,CTNNB1,CUL5,CYB5R1,DCXR,DGKB,DGKG,DLG3,DLG4,DLGAP1,DLGAP2,DLGAP3,DNAH7,DUSP1,EIF3J,ELAC2,ENPP7,ERC2,FAH,FKBP8,FNTB,FOS,GAD2,GCLM,GFM2,GORASP2,GRIA1,GRIN1,GRIN3A,GRM7,GSTP1,GSTZ1,HACE1,HADHA,HOMER1,IMMT,INHBA,JAM3,KATNA1,KCNA6,KC…	132
Cancer, Organismal Injury and Abnormalities	Incidence of tumor	7.17e-08		0.701		ABLIM2,ACPP,ACSL4,AFDN,AK3,ALCAM,ALDH6A1,ALPP,ANK3,ANKS1B,ANXA4,AOC3,APOB,ARHGEF11,ARHGEF6,ARHGEF7,ARL6IP5,ARMC10,ATAT1,ATL1,ATP2A2,ATP6AP1,ATRN,BEGAIN,BSN,CACNA1D,CACNA2D1,CACNA2D3,CACNB3,CANX,CASK,CC2D1A,CCDC116,CD151,CD82,CD9,CDH2,CDH8,CLIC4,CLUL1,COL2A1,COL3A1,COPS8,CPNE7,CRP,CRYZ,CTBP1,CTNNB1,CUL5,CYB5R1,DAGLA,DBN1,DCXR,DGKB,DGKG,DHX40,DLG3,DLG4,DLGAP1,DLGAP2,DLGAP3,DNAH7,DNAJB6,DNM1L,DUSP1,…	215
Cancer, Organismal Injury and Abnormalities	Tumorigenesis of epithelial neoplasm	1.07e-07		1.017		ABLIM2,ACPP,ACSL4,AK3,ALCAM,ALDH6A1,ALPP,ANK3,ANKS1B,ANXA4,AOC3,APOB,ARHGEF11,ARHGEF6,ARHGEF7,ARMC10,ATAT1,ATL1,ATP2A2,ATP6AP1,ATRN,BEGAIN,BSN,CACNA1D,CACNA2D1,CACNA2D3,CACNB3,CANX,CASK,CC2D1A,CCDC116,CD82,CD9,CDH2,CDH8,CLUL1,COL2A1,COL3A1,COPS8,CPNE7,CRP,CRYZ,CTBP1,CTNNB1,CUL5,CYB5R1,DAGLA,DBN1,DCXR,DGKB,DGKG,DHX40,DLG3,DLG4,DLGAP1,DLGAP2,DLGAP3,DNAH7,DNAJB6,DNM1L,DUSP1,EIF3J,ELAC2,ENO3,ENPP7,EQ…	211
Cancer, Organismal Injury and Abnormalities	Development of carcinoma	1.65e-07		0.687		ABLIM2,ACPP,ACSL4,AK3,ALCAM,ALDH6A1,ALPP,ANK3,ANKS1B,ANXA4,AOC3,APOB,ARHGEF11,ARHGEF6,ARHGEF7,ARMC10,ATAT1,ATL1,ATP2A2,ATP6AP1,ATRN,BEGAIN,BSN,CACNA1D,CACNA2D1,CACNA2D3,CACNB3,CANX,CASK,CC2D1A,CCDC116,CD82,CD9,CDH2,CDH8,CLUL1,COL2A1,COL3A1,COPS8,CPNE7,CRP,CRYZ,CTBP1,CTNNB1,CUL5,CYB5R1,DAGLA,DBN1,DCXR,DGKB,DGKG,DHX40,DLG3,DLG4,DLGAP1,DLGAP2,DLGAP3,DNAH7,DNAJB6,DUSP1,EIF3J,ELAC2,ENPP7,EQTN,ERC2,ERI…	208
Cancer, Organismal Injury and Abnormalities	Frequency of tumor	2.91e-07		0.425		ABLIM2,ACPP,ACSL4,AFDN,AK3,ALCAM,ALDH6A1,ALPP,ANK3,ANKS1B,ANXA4,AOC3,APOB,ARHGEF11,ARHGEF6,ARHGEF7,ARMC10,ATAT1,ATL1,ATP2A2,ATP6AP1,ATRN,BEGAIN,BSN,CACNA1D,CACNA2D1,CACNA2D3,CACNB3,CANX,CASK,CC2D1A,CCDC116,CD82,CD9,CDH2,CDH8,CLUL1,COL2A1,COL3A1,COPS8,CPNE7,CRP,CRYZ,CTBP1,CTNNB1,CUL5,CYB5R1,DAGLA,DBN1,DCXR,DGKB,DGKG,DHX40,DLG3,DLG4,DLGAP1,DLGAP2,DLGAP3,DNAH7,DNAJB6,DNM1L,DUSP1,EIF3J,ELAC2,ENO3,ENP…	212
Cancer, Organismal Injury and Abnormalities	Development of malignant tumor	3.18e-07		0.075		ABLIM2,ACPP,ACSL4,AFDN,AK3,ALCAM,ALDH6A1,ALPP,ANK3,ANKS1B,ANXA4,AOC3,APOB,ARHGEF11,ARHGEF6,ARHGEF7,ARMC10,ATAT1,ATL1,ATP2A2,ATP6AP1,ATRN,BEGAIN,BSN,CACNA1D,CACNA2D1,CACNA2D3,CACNB3,CANX,CASK,CC2D1A,CCDC116,CD82,CD9,CDH2,CDH8,CLUL1,COL2A1,COL3A1,COPS8,CPNE7,CRP,CRYZ,CTBP1,CTNNB1,CUL5,CYB5R1,DAGLA,DBN1,DCXR,DGKB,DGKG,DHX40,DLG3,DLG4,DLGAP1,DLGAP2,DLGAP3,DNAH7,DNAJB6,DUSP1,EIF3J,ELAC2,ENPP7,EQTN,ERC…	209
Cancer, Organismal Injury and Abnormalities	Adenocarcinoma	3.68e-07		0.036		ABLIM2,ACPP,ACSL4,ADCY6,AK3,ALCAM,ALDH6A1,ALPP,AMZ2,ANK3,ANKS1B,ANXA4,AOC3,APMAP,APOB,ARHGAP27,ARHGEF11,ARHGEF6,ARHGEF7,ARL5A,ARMC10,ATAT1,ATL1,ATP2A2,ATP5PB,ATP6AP1,ATRN,BEGAIN,BSN,C19orf44,C5orf34,CA3,CACNA1D,CACNA2D1,CACNA2D2,CACNA2D3,CACNB3,CAMK2D,CANX,CASK,CC2D1A,CCDC116,CD82,CD9,CDH2,CDH8,CDKN2AIP,CLIC4,CLUL1,CNIH2,COL2A1,COL3A1,COPS8,CPNE7,CRELD1,CRP,CRYZ,CTBP1,CTNNB1,CUL5,CYB5R1,DAGLA,DCX…	266
Cancer, Organismal Injury and Abnormalities	Ductal carcinoma	4.48e-07				ALPP,ARHGEF11,ARHGEF6,ARHGEF7,ARHGEF9,C19orf44,CACNA1D,CACNA2D1,CCDC116,CDH2,CDH8,CDKN2AIP,COL2A1,CPNE7,CRP,CTBP1,CTNNB1,CUL5,DGKB,DGKG,DLG3,DLGAP1,DLGAP2,DLGAP3,DNAH7,DNAJB6,DNM1L,DPYSL5,ELAC2,EQTN,ERC2,EXOC6,FOS,GABRA1,GABRB2,GABRG2,GHITM,GOLPH3L,GPHN,GPRASP1,GRID2,GRIN2B,GUCY1A2,HACE1,HADHA,IMMT,KATNA1,KCNA6,KCNQ2,KCNQ3,KLHL20,LRRC4B,MADD,MAGI2,MAOA,MARK2,MCCC1,MCCC2,MPP4,MPPED2,NBN,NINJ1,NLGN…	93
Cancer, Organismal Injury and Abnormalities	Cancer of secretory structure	6.2e-07				ACPP,ACSL4,ADCY6,ALPP,AMZ2,ANK3,ANKS1B,APOB,ARHGEF6,ARHGEF7,ATAT1,ATP5PB,ATRN,BEGAIN,BSN,C19orf44,C5orf34,CA3,CACNA1D,CACNA2D1,CACNA2D2,CACNB3,CASK,CC2D1A,CCDC116,CD82,CDH2,CDH8,CDKN2AIP,CLUL1,COL2A1,COL3A1,CPNE7,CRELD1,CRP,CTBP1,CTNNB1,CUL5,DGKB,DGKG,DLG3,DLGAP1,DLGAP3,DNAH7,DNM1L,DPYSL5,DUSP1,ELAC2,ENPP7,ERC2,EXOC6,FBXL16,FOS,FZD4,GABRA1,GABRB2,GABRG2,GAD2,GHITM,GLTP,GOLPH3L,GPD2,GPHN,GPRASP1,G…	158
Cancer, Organismal Injury and Abnormalities	Abdominal adenocarcinoma	7.94e-07				ABLIM2,ACPP,ACSL4,ADCY6,AK3,ALCAM,ALDH6A1,ALPP,AMZ2,ANK3,ANKS1B,ANXA4,AOC3,APMAP,APOB,ARHGAP27,ARHGEF11,ARHGEF6,ARHGEF7,ARL5A,ARMC10,ATAT1,ATL1,ATP2A2,ATP5PB,ATP6AP1,ATRN,BEGAIN,BSN,C19orf44,C5orf34,CA3,CACNA1D,CACNA2D1,CACNA2D2,CACNA2D3,CACNB3,CAMK2D,CANX,CASK,CC2D1A,CCDC116,CD82,CD9,CDH2,CDH8,CDKN2AIP,CLIC4,CLUL1,CNIH2,COL2A1,COL3A1,COPS8,CPNE7,CRELD1,CRP,CTBP1,CTNNB1,CUL5,CYB5R1,DAGLA,DCXR,DGK…	261
Cancer, Organismal Injury and Abnormalities	Breast or colorectal cancer	1.14e-06				ABLIM2,ACPP,ADCY6,AK3,ALCAM,ALDH6A1,ALPP,ANK3,ANKS1B,ANXA4,AOC3,APOB,ARHGEF11,ARHGEF6,ARHGEF7,ARL5A,ARMC10,ATAT1,ATP2A2,ATP5F1C,ATP6AP1,ATRN,BEGAIN,BSN,CACNA1D,CACNA2D1,CACNA2D2,CACNA2D3,CACNB3,CANX,CASK,CC2D1A,CD82,CD9,Cdc42,CDH2,CDH8,COL2A1,COL3A1,COMMD3,COPS8,CRELD1,CRP,CRYZ,CTBP1,CTNNB1,CUL5,CYB5R1,CYCS,DCXR,DGKB,DGKG,DHX40,DLG3,DLG4,DLGAP1,DLGAP2,DLGAP3,DNAH7,DNAJB6,DNM1L,DUSP1,EIF3J,ELAC2,E…	183
Cancer, Organismal Injury and Abnormalities	Non-melanoma solid tumor	1.65e-06		0.538		ABLIM2,ACPP,ACSL4,ADCY6,ADGRL1,AK3,ALCAM,ALDH6A1,ALPP,AMZ2,ANK3,ANKS1B,ANXA4,AOC3,APMAP,APOB,ARHGAP27,ARHGEF11,ARHGEF6,ARHGEF7,ARHGEF9,ARL5A,ARMC10,ATAT1,ATL1,ATP2A2,ATP5F1C,ATP5PB,ATP6AP1,ATRN,BEGAIN,BSN,C19orf44,C5orf34,CA3,CACNA1D,CACNA2D1,CACNA2D2,CACNA2D3,CACNB3,CAMK2D,CANX,CASK,CC2D1A,CCDC116,CD151,CD82,CD9,CDH2,CDH8,CDKN2AIP,CLIC4,CLUL1,CNIH2,COL2A1,COL3A1,COMMD3,COPS8,CPNE7,CRELD1,CRP,CRY…	286
Cancer, Organismal Injury and Abnormalities	Breast or pancreatic cancer	1.8e-06				ABLIM2,ACPP,ADCY6,AK3,ALCAM,ALPP,ANKS1B,AOC3,APOB,ARHGEF6,ARHGEF7,ARMC10,ATP5F1C,ATP6AP1,ATRN,BSN,C19orf44,CACNA1D,CACNA2D1,CACNA2D2,CACNA2D3,CASK,CC2D1A,CCDC116,CD9,Cdc42,CDH2,CDH8,CDKN2AIP,CLIC4,COL2A1,COL3A1,COMMD3,CPNE7,CRP,CTBP1,CTNNB1,CUL5,CYCS,DGKB,DGKG,DHX40,DLGAP1,DLGAP2,DLGAP3,DNAH7,DNAJB6,DNM1L,DPYSL5,DUSP1,ELAC2,EQTN,ERC2,ERICH6,EXOC6,FKBP8,FOS,GABRA1,GABRB2,GABRG2,GAD2,GHITM,GOLPH3L,…	153
Cancer, Organismal Injury and Abnormalities	Pelvic cancer	2.14e-06				ABLIM2,ACPP,ACSL4,ADCY6,AK3,ALCAM,ALPP,AMZ2,ANK3,ANKS1B,AOC3,APOB,ARHGEF11,ARHGEF6,ARMC10,ATAT1,ATL1,ATP5PB,ATP6AP1,ATRN,BEGAIN,BSN,C19orf44,CA3,CACNA1D,CACNA2D1,CACNA2D2,CACNA2D3,CACNB3,CASK,CC2D1A,CCDC116,CD82,CDH2,CDH8,CDKN2AIP,CLIC4,CLUL1,COL2A1,COL3A1,CPNE7,CRELD1,CRP,CTNNB1,DBN1,DGKB,DGKG,DLG3,DLGAP1,DLGAP2,DLGAP3,DNAH7,DNAJB6,DNM1L,DUSP1,ELAC2,ENPP7,ERC2,ERICH6,EXOC6,FBXL16,FNTB,FOS,FZD4,G…	184
Cancer, Organismal Injury and Abnormalities	Genitourinary adenocarcinoma	2.49e-06				ABLIM2,ACPP,ACSL4,ADCY6,AK3,ALPP,AMZ2,ANK3,ANKS1B,AOC3,APOB,ARHGEF11,ARHGEF6,ARHGEF7,ARMC10,ATL1,ATP5PB,ATRN,BEGAIN,BSN,C19orf44,CA3,CACNA1D,CACNA2D1,CACNA2D2,CACNA2D3,CACNB3,CASK,CC2D1A,CCDC116,CD82,CD9,CDH2,CDH8,CLUL1,COL2A1,COL3A1,CPNE7,CRELD1,CRP,CTNNB1,DGKB,DGKG,DHX40,DLG3,DLGAP1,DLGAP2,DLGAP3,DNAH7,DNAJB6,DNM1L,ENPP7,ERICH6,EXOC6,FBXL16,FOS,FZD4,GABRA1,GABRB2,GABRG2,GAD2,GALE,GHITM,GLTP,GPD…	168
Cancer, Organismal Injury and Abnormalities	Pelvic tumor	3.11e-06		-0.585		ABLIM2,ACPP,ACSL4,ADCY6,AK3,ALCAM,ALPP,AMZ2,ANK3,ANKS1B,AOC3,APOB,ARHGEF11,ARHGEF6,ARMC10,ATAT1,ATL1,ATP5PB,ATP6AP1,ATRN,BEGAIN,BSN,C19orf44,CA3,CACNA1D,CACNA2D1,CACNA2D2,CACNA2D3,CACNB3,CASK,CC2D1A,CCDC116,CD82,CDH2,CDH8,CDKN2AIP,CLIC4,CLUL1,COL2A1,COL3A1,CPNE7,CRELD1,CRP,CTNNB1,DBN1,DGKB,DGKG,DLG3,DLGAP1,DLGAP2,DLGAP3,DNAH7,DNAJB6,DNM1L,DUSP1,ELAC2,ENPP7,ERC2,ERICH6,EXOC6,FBXL16,FNTB,FOS,FZD4,G…	186
Cancer, Organismal Injury and Abnormalities	Abdominal carcinoma	3.29e-06		0.075		ABLIM2,ACPP,ACSL4,ADCY6,AK3,ALCAM,ALDH6A1,ALPP,AMZ2,ANK3,ANKS1B,ANXA4,AOC3,APMAP,APOB,ARHGAP27,ARHGEF11,ARHGEF6,ARHGEF7,ARHGEF9,ARL5A,ARMC10,ATAT1,ATL1,ATP2A2,ATP5PB,ATP6AP1,ATRN,BEGAIN,BSN,C19orf44,C5orf34,CA3,CACNA1D,CACNA2D1,CACNA2D2,CACNA2D3,CACNB3,CAMK2D,CANX,CASK,CC2D1A,CCDC116,CD82,CD9,CDH2,CDH8,CDKN2AIP,CLIC4,CLUL1,CNIH2,COL2A1,COL3A1,COPS8,CPNE7,CRELD1,CRP,CTBP1,CTNNB1,CUL5,CYB5R1,DAGLA,…	271
Cancer, Organismal Injury and Abnormalities	Cancer	3.54e-06		-0.019		ABLIM2,ACPP,ACSL4,ADCY6,ADGRL1,AFDN,AK3,ALCAM,ALDH6A1,ALPP,AMZ2,ANK3,ANKH,ANKS1B,ANXA4,AOC3,APMAP,APOB,ARHGAP27,ARHGEF11,ARHGEF6,ARHGEF7,ARHGEF9,ARL5A,ARL6IP5,ARMC10,ATAT1,ATL1,ATP2A2,ATP5F1C,ATP5PB,ATP6AP1,ATRN,BEGAIN,BSN,C19orf44,C5orf34,CA3,CACNA1D,CACNA2D1,CACNA2D2,CACNA2D3,CACNB3,CAMK2D,CANX,CARHSP1,CASK,CC2D1A,CCDC116,CD151,CD82,CD9,Cdc42,CDH2,CDH8,CDKN2AIP,CLIC4,CLUL1,CNIH2,COL2A1,COL3A1,C…	297
Cancer, Organismal Injury and Abnormalities	Tumorigenesis of tissue	4.26e-06		0.908		ABLIM2,ACPP,ACSL4,ADCY6,AK3,ALCAM,ALDH6A1,ALPP,AMZ2,ANK3,ANKS1B,ANXA4,AOC3,APMAP,APOB,ARHGAP27,ARHGEF11,ARHGEF6,ARHGEF7,ARHGEF9,ARL5A,ARMC10,ATAT1,ATL1,ATP2A2,ATP5F1C,ATP5PB,ATP6AP1,ATRN,BEGAIN,BSN,C19orf44,C5orf34,CA3,CACNA1D,CACNA2D1,CACNA2D2,CACNA2D3,CACNB3,CAMK2D,CANX,CASK,CC2D1A,CCDC116,CD82,CD9,CDH2,CDH8,CDKN2AIP,CLIC4,CLUL1,CNIH2,COL2A1,COL3A1,COMMD3,COPS8,CPNE7,CRELD1,CRP,CRYZ,CSAD,CTBP1,…	283
Cancer, Organismal Injury and Abnormalities	Non-hematological solid tumor	6.95e-06		1.108		ABLIM2,ACPP,ACSL4,ADCY6,ADGRL1,AK3,ALCAM,ALDH6A1,ALPP,AMZ2,ANK3,ANKH,ANKS1B,ANXA4,AOC3,APMAP,APOB,ARHGAP27,ARHGEF11,ARHGEF6,ARHGEF7,ARHGEF9,ARL5A,ARL6IP5,ARMC10,ATAT1,ATL1,ATP2A2,ATP5F1C,ATP5PB,ATP6AP1,ATRN,BEGAIN,BSN,C19orf44,C5orf34,CA3,CACNA1D,CACNA2D1,CACNA2D2,CACNA2D3,CACNB3,CAMK2D,CANX,CARHSP1,CASK,CC2D1A,CCDC116,CD82,CD9,CDH2,CDH8,CDKN2AIP,CLIC4,CLUL1,CNIH2,COL2A1,COL3A1,COMMD3,COPS8,CPNE7…	290
Cancer, Organismal Injury and Abnormalities	Nonhematologic malignant neoplasm	1.07e-05		0.564		ABLIM2,ACPP,ACSL4,ADCY6,AK3,ALCAM,ALDH6A1,ALPP,AMZ2,ANK3,ANKH,ANKS1B,ANXA4,AOC3,APMAP,APOB,ARHGAP27,ARHGEF11,ARHGEF6,ARHGEF7,ARHGEF9,ARL5A,ARL6IP5,ARMC10,ATAT1,ATL1,ATP2A2,ATP5F1C,ATP5PB,ATP6AP1,ATRN,BEGAIN,BSN,C19orf44,C5orf34,CA3,CACNA1D,CACNA2D1,CACNA2D2,CACNA2D3,CACNB3,CAMK2D,CANX,CARHSP1,CASK,CC2D1A,CCDC116,CD82,CD9,CDH2,CDH8,CDKN2AIP,CLIC4,CLUL1,CNIH2,COL2A1,COL3A1,COMMD3,COPS8,CPNE7,CRELD1…	288
Cancer, Organismal Injury and Abnormalities	Malignant genitourinary solid tumor	1.2e-05		0.436		ABLIM2,ACPP,ACSL4,ADCY6,AK3,ALCAM,ALPP,AMZ2,ANK3,ANKS1B,AOC3,APOB,ARHGEF11,ARHGEF6,ARHGEF7,ARMC10,ATL1,ATP5F1C,ATP5PB,ATP6AP1,ATRN,BEGAIN,BSN,C19orf44,CA3,CACNA1D,CACNA2D1,CACNA2D2,CACNA2D3,CACNB3,CASK,CC2D1A,CCDC116,CD82,CD9,Cdc42,CDH2,CDH8,CDKN2AIP,CLIC4,CLUL1,COL2A1,COL3A1,COMMD3,CPNE7,CRELD1,CRP,CTNNB1,CYCS,DBN1,DGKB,DGKG,DHX40,DLG3,DLGAP1,DLGAP2,DLGAP3,DNAH7,DNAJB6,DNM1L,DUSP1,ELAC2,ENPP7,EQ…	205
Cancer, Organismal Injury and Abnormalities	Epithelial neoplasm	1.38e-05		0.623		ABLIM2,ACPP,ACSL4,ADCY6,AK3,ALCAM,ALDH6A1,ALPP,AMZ2,ANK3,ANKS1B,ANXA4,AOC3,APMAP,APOB,ARHGAP27,ARHGEF11,ARHGEF6,ARHGEF7,ARHGEF9,ARL5A,ARMC10,ATAT1,ATL1,ATP2A2,ATP5F1C,ATP5PB,ATP6AP1,ATRN,BEGAIN,BSN,C19orf44,C5orf34,CA3,CACNA1D,CACNA2D1,CACNA2D2,CACNA2D3,CACNB3,CAMK2D,CANX,CASK,CC2D1A,CCDC116,CD82,CD9,CDH2,CDH8,CDKN2AIP,CLIC4,CLUL1,CNIH2,COL2A1,COL3A1,COMMD3,COPS8,CPNE7,CRELD1,CRP,CRYZ,CSAD,CTBP1,…	280
Cancer, Organismal Injury and Abnormalities	Genitourinary tumor	1.41e-05		0.25		ABLIM2,ACPP,ACSL4,ADCY6,AK3,ALCAM,ALPP,AMZ2,ANK3,ANKS1B,AOC3,APOB,ARHGEF11,ARHGEF6,ARHGEF7,ARMC10,ATL1,ATP5F1C,ATP5PB,ATP6AP1,ATRN,BEGAIN,BSN,C19orf44,CA3,CACNA1D,CACNA2D1,CACNA2D2,CACNA2D3,CACNB3,CASK,CC2D1A,CCDC116,CD151,CD82,CD9,Cdc42,CDH2,CDH8,CDKN2AIP,CLIC4,CLUL1,COL2A1,COL3A1,COMMD3,CPNE7,CRELD1,CRP,CTNNB1,CYCS,DBN1,DGKB,DGKG,DHX40,DLG3,DLGAP1,DLGAP2,DLGAP3,DNAH7,DNAJB6,DNM1L,DUSP1,ELAC2,EN…	208
Cancer, Organismal Injury and Abnormalities	Carcinoma	1.59e-05		0.28		ABLIM2,ACPP,ACSL4,ADCY6,AK3,ALCAM,ALDH6A1,ALPP,AMZ2,ANK3,ANKS1B,ANXA4,AOC3,APMAP,APOB,ARHGAP27,ARHGEF11,ARHGEF6,ARHGEF7,ARHGEF9,ARL5A,ARMC10,ATAT1,ATL1,ATP2A2,ATP5F1C,ATP5PB,ATP6AP1,ATRN,BEGAIN,BSN,C19orf44,C5orf34,CA3,CACNA1D,CACNA2D1,CACNA2D2,CACNA2D3,CACNB3,CAMK2D,CANX,CASK,CC2D1A,CCDC116,CD82,CD9,CDH2,CDH8,CDKN2AIP,CLIC4,CLUL1,CNIH2,COL2A1,COL3A1,COMMD3,COPS8,CPNE7,CRELD1,CRP,CRYZ,CSAD,CTBP1,…	279
Cancer, Organismal Injury and Abnormalities	Genitourinary carcinoma	1.79e-05				ABLIM2,ACPP,ACSL4,ADCY6,AK3,ALPP,AMZ2,ANK3,ANKS1B,AOC3,APOB,ARHGEF11,ARHGEF6,ARHGEF7,ARMC10,ATL1,ATP5PB,ATRN,BEGAIN,BSN,C19orf44,CA3,CACNA1D,CACNA2D1,CACNA2D2,CACNA2D3,CACNB3,CASK,CC2D1A,CCDC116,CD82,CD9,CDH2,CDH8,CLUL1,COL2A1,COL3A1,CPNE7,CRELD1,CRP,CTNNB1,DBN1,DGKB,DGKG,DHX40,DLG3,DLGAP1,DLGAP2,DLGAP3,DNAH7,DNAJB6,DNM1L,DUSP1,ENPP7,ERICH6,EXOC6,FAH,FBXL16,FNTB,FOS,FZD4,GABRA1,GABRB2,GABRG2,GAD2…	176
Cancer, Organismal Injury and Abnormalities	Malignant solid tumor	2.02e-05		-0.023		ABLIM2,ACPP,ACSL4,ADCY6,AK3,ALCAM,ALDH6A1,ALPP,AMZ2,ANK3,ANKH,ANKS1B,ANXA4,AOC3,APMAP,APOB,ARHGAP27,ARHGEF11,ARHGEF6,ARHGEF7,ARHGEF9,ARL5A,ARL6IP5,ARMC10,ATAT1,ATL1,ATP2A2,ATP5F1C,ATP5PB,ATP6AP1,ATRN,BEGAIN,BSN,C19orf44,C5orf34,CA3,CACNA1D,CACNA2D1,CACNA2D2,CACNA2D3,CACNB3,CAMK2D,CANX,CARHSP1,CASK,CC2D1A,CCDC116,CD151,CD82,CD9,Cdc42,CDH2,CDH8,CDKN2AIP,CLIC4,CLUL1,CNIH2,COL2A1,COL3A1,COMMD3,COPS8,…	293
Cancer, Organismal Injury and Abnormalities	Abdominal cancer	2.25e-05		-0.082		ABLIM2,ACPP,ACSL4,ADCY6,AK3,ALCAM,ALDH6A1,ALPP,AMZ2,ANK3,ANKS1B,ANXA4,AOC3,APMAP,APOB,ARHGAP27,ARHGEF11,ARHGEF6,ARHGEF7,ARHGEF9,ARL5A,ARMC10,ATAT1,ATL1,ATP2A2,ATP5PB,ATP6AP1,ATRN,BEGAIN,BSN,C19orf44,C5orf34,CA3,CACNA1D,CACNA2D1,CACNA2D2,CACNA2D3,CACNB3,CAMK2D,CANX,CASK,CC2D1A,CCDC116,CD82,CD9,CDH2,CDH8,CDKN2AIP,CLIC4,CLUL1,CNIH2,COL2A1,COL3A1,COPS8,CPNE7,CRELD1,CRP,CRYZ,CTBP1,CTNNB1,CUL5,CYB5R1,D…	275
Cancer, Organismal Injury and Abnormalities	Solid tumor	3.91e-05		0.084		ABLIM2,ACPP,ACSL4,ADCY6,ADGRL1,AK3,ALCAM,ALDH6A1,ALPP,AMZ2,ANK3,ANKH,ANKS1B,ANXA4,AOC3,APMAP,APOB,ARHGAP27,ARHGEF11,ARHGEF6,ARHGEF7,ARHGEF9,ARL5A,ARL6IP5,ARMC10,ATAT1,ATL1,ATP2A2,ATP5F1C,ATP5PB,ATP6AP1,ATRN,BEGAIN,BSN,C19orf44,C5orf34,CA3,CACNA1D,CACNA2D1,CACNA2D2,CACNA2D3,CACNB3,CAMK2D,CANX,CARHSP1,CASK,CC2D1A,CCDC116,CD151,CD82,CD9,Cdc42,CDH2,CDH8,CDKN2AIP,CLIC4,CLUL1,CNIH2,COL2A1,COL3A1,COMMD3…	297
Cancer, Organismal Injury and Abnormalities	Extracranial solid tumor	8.97e-05		-0.145		ABLIM2,ACPP,ACSL4,ADCY6,AK3,ALCAM,ALDH6A1,ALPP,AMZ2,ANK3,ANKH,ANKS1B,ANXA4,AOC3,APMAP,APOB,ARHGAP27,ARHGEF11,ARHGEF6,ARHGEF7,ARHGEF9,ARL5A,ARL6IP5,ARMC10,ATAT1,ATL1,ATP2A2,ATP5F1C,ATP5PB,ATP6AP1,ATRN,BEGAIN,BSN,C19orf44,C5orf34,CA3,CACNA1D,CACNA2D1,CACNA2D2,CACNA2D3,CACNB3,CAMK2D,CANX,CARHSP1,CASK,CC2D1A,CCDC116,CD151,CD82,CD9,Cdc42,CDH2,CDH8,CDKN2AIP,CLIC4,CLUL1,CNIH2,COL2A1,COL3A1,COMMD3,COPS8,…	293
Cancer, Organismal Injury and Abnormalities	Abdominal neoplasm	0.000104		-0.19		ABLIM2,ACPP,ACSL4,ADCY6,AK3,ALCAM,ALDH6A1,ALPP,AMZ2,ANK3,ANKS1B,ANXA4,AOC3,APMAP,APOB,ARHGAP27,ARHGEF11,ARHGEF6,ARHGEF7,ARHGEF9,ARL5A,ARMC10,ATAT1,ATL1,ATP2A2,ATP5PB,ATP6AP1,ATRN,BEGAIN,BSN,C19orf44,C5orf34,CA3,CACNA1D,CACNA2D1,CACNA2D2,CACNA2D3,CACNB3,CAMK2D,CANX,CARHSP1,CASK,CC2D1A,CCDC116,CD82,CD9,CDH2,CDH8,CDKN2AIP,CLIC4,CLUL1,CNIH2,COL2A1,COL3A1,COPS8,CPNE7,CRELD1,CRP,CRYZ,CSAD,CTBP1,CTNNB1,…	282
Cancer, Organismal Injury and Abnormalities	Development of adenocarcinoma	0.000175				ABLIM2,ACPP,ACSL4,AK3,ALPP,ANK3,ANKS1B,AOC3,APOB,ARHGEF11,ARHGEF6,ARHGEF7,ARMC10,ATL1,ATP2A2,ATRN,BSN,CACNA1D,CACNA2D1,CACNA2D3,CASK,CC2D1A,CCDC116,CD9,CDH2,CDH8,CLUL1,COL2A1,COL3A1,CPNE7,CRP,CRYZ,CTNNB1,DAGLA,DGKB,DHX40,DLG3,DLGAP1,DLGAP2,DNAH7,DNAJB6,ERICH6,EXOC6,FOS,GABRA1,GABRB2,GABRG2,GAD2,GHITM,GPHN,GPRASP1,GRIA1,GRIA2,GRIN2B,GRIN3A,GRM7,GSTP1,GUCY1A2,HK1,IMMT,INHBA,JAM3,KCNH8,KCNMA1,KCNQ2,…	132
Cancer, Organismal Injury and Abnormalities	Malignant neoplasm of retroperitoneum	0.000183				ARHGEF6,ARHGEF7,ATP6AP1,C19orf44,CACNA1D,CCDC116,CD9,CDH2,CDH8,CDKN2AIP,CLUL1,COL2A1,CPNE7,CRP,CTBP1,CTNNB1,CUL5,DGKB,DGKG,DHX40,DLGAP1,DLGAP3,DNAH7,DNM1L,DPYSL5,ELAC2,ERC2,EXOC6,FAH,FOS,GABRA1,GABRB2,GABRG2,GHITM,GOLPH3L,GPHN,GPRASP1,GRID2,GRIN3A,GSN,GSTP1,GUCY1A2,HADHA,JAM3,KATNA1,KCNA6,KCNMA1,KCNQ2,KCNQ3,KCNT2,LRRC4B,MADD,MAGI2,MCCC1,MCCC2,MPP4,MPPED2,NBN,NFKBIA,NINJ1,NLGN1,NLGN2,NPTX1,PAM,PCL…	94
Cancer, Organismal Injury and Abnormalities	Benign Tumors	0.000193		0.998		ADGRL1,ALCAM,ATP2A2,ATRN,CACNA1D,CDH2,COL2A1,COL3A1,CRP,CTNNB1,DBN1,DNM1L,DUSP1,ENO3,FAH,FOS,GDF11,GLTP,GRIA2,GSTP1,GUCY1A2,INHBA,MAOA,NBN,NDRG1,PARK7,PRDX1,RAB9A,SCG2,SNPH,SPTAN1,TNNI2,TRPV1,TSC1,TUBB4B	35
Cancer, Organismal Injury and Abnormalities, Reproductive System Disease	Prostatic adenocarcinoma	2.79e-06				ACPP,ACSL4,ADCY6,ALPP,AMZ2,ANK3,ANKS1B,APOB,ATP5PB,BEGAIN,BSN,C19orf44,CA3,CACNA2D1,CACNA2D2,CACNB3,CASK,CC2D1A,CD82,CDH2,CDH8,CLUL1,COL3A1,CPNE7,CRELD1,CTNNB1,DGKB,DGKG,DLG3,DLGAP1,DLGAP3,DNAH7,DNM1L,ENPP7,FBXL16,FOS,FZD4,GABRB2,GAD2,GLTP,GPD2,GPHN,GRIA1,GRID2,GRIN1,GSN,GUCY1A2,IMMT,JAM3,KCNH8,KCNJ6,KCNMA1,KCNQ3,MADD,MARK3,MPP2,MPPED2,MYO1C,NBN,NCDN,NPTXR,NTRK3,PAM,PCLO,PER1,PIP5K1C,PLEC,PPP2R2C…	101
Cancer, Organismal Injury and Abnormalities, Reproductive System Disease	Genital tract cancer	7.17e-06				ABLIM2,ACPP,ACSL4,ADCY6,AK3,ALCAM,ALPP,AMZ2,ANK3,ANKS1B,AOC3,APOB,ARHGEF11,ARHGEF6,ARMC10,ATL1,ATP5PB,ATP6AP1,ATRN,BEGAIN,BSN,C19orf44,CA3,CACNA1D,CACNA2D1,CACNA2D2,CACNA2D3,CACNB3,CASK,CC2D1A,CCDC116,CD82,CDH2,CDH8,CDKN2AIP,CLIC4,CLUL1,COL2A1,COL3A1,CPNE7,CRELD1,CRP,CTNNB1,DBN1,DGKB,DGKG,DLG3,DLGAP1,DLGAP2,DLGAP3,DNAH7,DNAJB6,DNM1L,DUSP1,ELAC2,ENPP7,ERICH6,EXOC6,FBXL16,FNTB,FOS,FZD4,GABRA1,GABRB…	177
Cancer, Organismal Injury and Abnormalities, Reproductive System Disease	Prostate cancer	7.28e-06				ACPP,ACSL4,ADCY6,ALPP,AMZ2,ANK3,ANKS1B,APOB,ATP5PB,BEGAIN,BSN,C19orf44,CA3,CACNA1D,CACNA2D1,CACNA2D2,CACNB3,CASK,CC2D1A,CD82,CDH2,CDH8,CDKN2AIP,CLUL1,COL3A1,CPNE7,CRELD1,CRP,CTNNB1,DGKB,DGKG,DLG3,DLGAP1,DLGAP3,DNAH7,DNM1L,DUSP1,ELAC2,ENPP7,FBXL16,FOS,FZD4,GABRA1,GABRB2,GAD2,GLTP,GPD2,GPHN,GRIA1,GRID2,GRIN1,GSN,GSTP1,GUCY1A2,IMMT,JAM3,KCNH8,KCNJ6,KCNMA1,KCNQ3,KLHL20,MADD,MAGI2,MARK3,MPP2,MPPED2,MY…	115
Cancer, Organismal Injury and Abnormalities, Reproductive System Disease	Prostatic carcinoma	7.46e-06				ACPP,ACSL4,ADCY6,ALPP,AMZ2,ANK3,ANKS1B,APOB,ATP5PB,BEGAIN,BSN,C19orf44,CA3,CACNA2D1,CACNA2D2,CACNB3,CASK,CC2D1A,CD82,CDH2,CDH8,CLUL1,COL3A1,CPNE7,CRELD1,CTNNB1,DGKB,DGKG,DLG3,DLGAP1,DLGAP3,DNAH7,DNM1L,DUSP1,ENPP7,FBXL16,FOS,FZD4,GABRB2,GAD2,GLTP,GPD2,GPHN,GRIA1,GRID2,GRIN1,GSN,GSTP1,GUCY1A2,IMMT,JAM3,KCNH8,KCNJ6,KCNMA1,KCNQ3,MADD,MARK3,MPP2,MPPED2,MYO1C,NBN,NCDN,NPTXR,NTRK3,PAM,PCLO,PER1,PIP5K1C,…	103
Cancer, Organismal Injury and Abnormalities, Reproductive System Disease	Genital tumor	9.92e-06		-0.469		ABLIM2,ACPP,ACSL4,ADCY6,AK3,ALCAM,ALPP,AMZ2,ANK3,ANKS1B,AOC3,APOB,ARHGEF11,ARHGEF6,ARMC10,ATL1,ATP5PB,ATP6AP1,ATRN,BEGAIN,BSN,C19orf44,CA3,CACNA1D,CACNA2D1,CACNA2D2,CACNA2D3,CACNB3,CASK,CC2D1A,CCDC116,CD82,CDH2,CDH8,CDKN2AIP,CLIC4,CLUL1,COL2A1,COL3A1,CPNE7,CRELD1,CRP,CTNNB1,DBN1,DGKB,DGKG,DLG3,DLGAP1,DLGAP2,DLGAP3,DNAH7,DNAJB6,DNM1L,DUSP1,ELAC2,ENPP7,ERICH6,EXOC6,FBXL16,FNTB,FOS,FZD4,GABRA1,GABRB…	179
Cancer, Organismal Injury and Abnormalities, Reproductive System Disease	Metastasis of prostate cancer cell lines	4.54e-05				ALCAM,CD82,NDRG1,NFKBIA	4
Carbohydrate Metabolism	Quantity of carbohydrate	3.12e-05		-1.192		ACPP,ATP2A2,DCXR,DGKB,DLGAP3,DUSP1,FKBP1B,GAD2,Gk,GPD2,GRIN1,HK1,INHBA,IP6K1,MADD,MARK3,MRAS,NCEH1,PFKFB1,PIP5K1C,PRKAA1,PTPRN2,PTPRS,RPH3AL,STEAP3,SYNJ1,VAMP7	27
Carbohydrate Metabolism	Phosphorylation of carbohydrate	0.00041				HK1,IP6K1,PFKFB1,PIP5K1C,SYNJ1	5
Cardiovascular Disease	Disorder of blood pressure	1.6e-07		0.917		ADCY6,ADGRL1,AGTRAP,AOC3,APOB,ATP2A2,CA3,CACNA1D,CACNA2D1,CACNA2D2,CACNB3,CRP,DNAJB6,DUSP1,ELAC2,FKBP1B,FZD4,GABRA1,GABRB2,GABRG2,GRIA1,GSN,GSTP1,GUCY1A2,MAOA,NFKBIA,NLGN1,NTRK3,PPP1R14A,REN,SCG2,SHANK3,STK39,TMEM38A,TMOD1,TRPV1,VKORC1,ZFYVE27	38
Cardiovascular Disease	Hypertension	3.33e-06		0.34		ADCY6,ADGRL1,AGTRAP,AOC3,APOB,ATP2A2,CA3,CACNA1D,CACNA2D1,CACNA2D2,CACNB3,CRP,DNAJB6,ELAC2,FKBP1B,FZD4,GABRA1,GABRB2,GABRG2,GRIA1,GSN,GSTP1,GUCY1A2,MAOA,NLGN1,NTRK3,PPP1R14A,REN,SCG2,SHANK3,STK39,TMOD1,VKORC1,ZFYVE27	34
Cardiovascular Disease	Primary hypertension	0.000128				AOC3,CA3,CACNA1D,CACNA2D1,CACNA2D2,CACNB3,GUCY1A2,REN,STK39	9
Cardiovascular Disease	Stage II hypertension	0.000428				CA3,CACNA1D,CACNA2D1,REN	4
Cardiovascular Disease, Connective Tissue Disorders, Hematological Disease, Hereditary Disorder, Organismal Injury and Abnormalities	Hemoglobin SC disease	0.000114				GRIN1,GRIN2B,GRIN3A	3
Cardiovascular Disease, Connective Tissue Disorders, Hematological Disease, Hereditary Disorder, Organismal Injury and Abnormalities	Sickle cell anemia with crisis	0.000379				GRIN1,GRIN2B,GRIN3A	3
Cardiovascular Disease, Hematological Disease, Hereditary Disorder, Metabolic Disease, Organismal Injury and Abnormalities	Heterozygous familial hypercholesterolemia	0.000268				APOB,CACNA1D,CACNA2D1	3
Cardiovascular Disease, Neurological Disease, Organismal Injury and Abnormalities	Cerebrovascular dysfunction	1.99e-05				AOC3,APOB,CA3,CACNA1D,CACNA2D1,CACNB3,CRP,GABRA1,GABRB2,GABRG2,GRIA1,GRIN1,GRIN2B,GRIN3A,GSN,RASGRF2,TUBB4B,VKORC1	18
Cardiovascular Disease, Neurological Disease, Organismal Injury and Abnormalities	Stroke	2.08e-05				AOC3,APOB,CA3,CACNA1D,CACNA2D1,CRP,GABRA1,GABRB2,GABRG2,GRIA1,GRIN1,GRIN2B,GRIN3A,TUBB4B,VKORC1	15
Cardiovascular Disease, Organismal Injury and Abnormalities	Failure of heart	6.13e-08				AOC3,ATP2A2,CA3,CACNA1D,CACNA2D1,CACNA2D2,CACNB3,CAMK2D,CRP,GABRA1,GABRB2,GABRG2,GRIN1,GRIN2B,GRIN3A,GUCY1A2,HACE1,Mff,PARK7,REN,RYR2,VKORC1	22
Cardiovascular Disease, Organismal Injury and Abnormalities	Carotid artery stenosis	4.02e-06				CACNA1D,CACNA2D1,GABRA1,GABRB2,GABRG2,GRIA1	6
Cardiovascular Disease, Organismal Injury and Abnormalities	Arrhythmia	2.9e-05				ATP2A2,CACNA1D,CACNA2D1,CACNA2D2,CACNB3,COL3A1,CRP,FKBP1B,KCNMA1,MAOA,REN,RIMS1,RYR2,TUBB4B,VKORC1	15
Cardiovascular Disease, Organismal Injury and Abnormalities	Chronic stable angina	0.000176				CACNA1D,CACNA2D1,CACNA2D2,CACNB3,CRP,GUCY1A2	6
Cardiovascular Disease, Organismal Injury and Abnormalities	Peripheral vascular disease	0.000219				AOC3,APOB,CA3,CACNA1D,CACNA2D1,CACNB3,CRP,GABRA1,GABRB2,GABRG2,GRIA1,GRIA2,GRIN1,GRIN2B,GRIN3A,GSN,HSPA1A/HSPA1B,MPPED2,RASGRF2,TOMM70,TUBB4B,VKORC1	22
Cardiovascular Disease, Organismal Injury and Abnormalities	Infarction	0.000237				AOC3,APOB,CA3,CACNA1D,CACNA2D1,CACNB3,COL3A1,CRP,FOS,GCLM,GRIN1,GSN,GUCY1A2,MAOA,NAMPT,NFKBIA,REN,TUBB4B,VKORC1	19
Cardiovascular Disease, Organismal Injury and Abnormalities	Stenosis of semilunar valve	0.000237				APOB,GABRA1,GABRB2,GABRG2,GRIA1,NTRK3	6
Cardiovascular Disease, Organismal Injury and Abnormalities	Aortic valve disease	0.000303				APOB,CTNNB1,GABRA1,GABRB2,GABRG2,GRIA1,NTRK3	7
Cardiovascular Disease, Organismal Injury and Abnormalities	Mitral valvular disease	0.000313				ATP2A2,CTNNB1,GABRA1,GABRB2,GABRG2,NTRK3	6
Cardiovascular Disease, Organismal Injury and Abnormalities	Abnormality of left ventricle	0.00036				APOB,ATP2A2,CACNA1D,CACNA2D1,CTNNB1,FKBP1B,GABRA1,GABRB2,GABRG2,GRIA1,NTRK3,REN,RYR2	13
Cardiovascular Disease, Organismal Injury and Abnormalities	Stenosis of artery	0.000407				ATP2A2,CACNA1D,CACNA2D1,CRP,GABRA1,GABRB2,GABRG2,GRIA1	8
Cardiovascular Disease, Organismal Injury and Abnormalities	Arteriosclerosis	0.000429		-0.35		APOB,CA3,CACNA1D,CACNA2D1,CACNB3,COL2A1,CRP,CTNNB1,FOS,GABRA1,GABRB2,GABRG2,GCLM,GRIA1,GRIN1,GRIN2B,GRIN3A,GUCY1A2,NCEH1,NFKBIA,REN,TUBB4B,VKORC1	23
Cardiovascular Disease, Organismal Injury and Abnormalities, Respiratory Disease	Cardiorespiratory arrest	1.21e-06				GABRA1,GABRB2,GABRG2,GRIN1,GRIN2B,GRIN3A	6
Cardiovascular Disease, Organismal Injury and Abnormalities, Skeletal and Muscular Disorders	Cardiac fibrillation	1.68e-05				ATP2A2,CACNA1D,CACNA2D2,CACNB3,COL3A1,CRP,FKBP1B,KCNMA1,MAOA,RYR2,TUBB4B,VKORC1	12
Cardiovascular Disease, Organismal Injury and Abnormalities, Skeletal and Muscular Disorders	Atrial fibrillation	2.33e-05				ATP2A2,CACNA1D,CACNA2D2,CACNB3,COL3A1,CRP,FKBP1B,KCNMA1,MAOA,TUBB4B,VKORC1	11
Cardiovascular System Development and Function	Morphology of cardiovascular system	9.58e-06				ADCY6,AFDN,AOC3,APOB,ARHGEF11,ATP2A2,CACNA1D,CACNA2D1,CACNB3,CAMK2D,CD151,CDH2,CLIC4,COL2A1,COL3A1,CTNNB1,DUSP1,FKBP1B,GCLM,GDF11,GSN,HADHA,HMOX2,INHBA,MARK2,NFKBIA,NTRK3,PAM,PARK7,PFKFB1,PLEC,PRKAA1,REN,RYR2,TMEM38A,TMOD1,TSC1	37
Cardiovascular System Development and Function	Development of vasculature	8.4e-05		-0.174		ALCAM,AOC3,APOB,ARHGEF11,CACNB3,CC2D1A,CD151,CD82,CD9,Cdc42,CDH2,CLIC4,COL3A1,CRELD1,CTNNB1,CUL5,CYCS,FOS,FZD4,GCLM,GIT1,GSN,HMOX2,INHBA,JAM3,KCNMA1,KLHL20,LLGL1,MARK2,NDRG1,NFKBIA,NLGN1,NPTX1,NTRK3,PAM,PRKAA1,RAB9A,REN,SCG2,SHROOM2,SNX17,STK39,STX6,TMOD1	44
Cardiovascular System Development and Function, Cellular Function and Maintenance, Organ Development, Skeletal and Muscular System Development and Function, Tissue Development	Function of cardiomyocytes	0.000366				CACNA1D,DNM1L,MAOA,RYR2,TMEM38A	5
Cardiovascular System Development and Function, Hematological System Development and Function	Blood pressure	0.000104		0.425		ADCY6,AGTRAP,AOC3,APOB,ATP2A2,CACNB3,DUSP1,FKBP1B,GRIN1,GUCY1A2,KCNMA1,MAOA,NFKBIA,REN,SNX1,STK39,TRPV1	17
Cardiovascular System Development and Function, Organ Development, Skeletal and Muscular System Development and Function	Function of cardiac muscle	0.000151		1.941	bias	ADCY6,APOB,ATP2A2,CACNA1D,CACNA2D1,Cdc42,DNM1L,FKBP1B,MAOA,PFKFB1,RYR2,TMEM38A	12
Cardiovascular System Development and Function, Organ Morphology, Organismal Development	Morphology of heart	0.000111				ADCY6,AFDN,APOB,ARHGEF11,ATP2A2,CACNA1D,CACNA2D1,CACNB3,CAMK2D,CDH2,COL2A1,CTNNB1,DUSP1,FKBP1B,GDF11,GSN,HADHA,INHBA,NFKBIA,NTRK3,PARK7,PFKFB1,PLEC,PRKAA1,REN,RYR2,TMEM38A,TMOD1,TSC1	29
Cell Cycle	Mitochondrial fission of cervical cancer cell lines	0.000268				DNM1L,Mff,OPA1	3
Cell Death and Survival	Neuronal cell death	1.09e-09		0.201		CACNA2D2,CC2D1A,Cdc42,CDH2,CTNNB1,CYCS,DLG4,DNAJC5,DNM1L,DUSP1,FOS,GABRB2,GAD2,GCLM,GRIA2,GRID2,GRIN1,GRIN2B,GRIN3A,GRM7,HMOX2,INHBA,KCNJ6,KCNMA1,LHX1,MADD,MAOA,NBN,Nes,NFKBIA,NPTX1,NTRK3,PARK7,Ppp1cc,PPP1R9B,PRKAA1,SH3GL2,SNCB,STX8,SYNGAP1,TGM1,TSC1	42
Cell Death and Survival	Cell death	2.15e-09		-0.966		ACSL4,ADCY6,ALCAM,ANK3,ANXA4,APMAP,APOB,ARHGEF6,ARHGEF7,ARL6IP5,ARMC10,ATAT1,ATP2A2,ATP6AP1,CA3,CACNA1D,CACNA2D2,CACNB3,CAMK2D,CANX,CC2D1A,CD151,CD82,CD9,Cdc42,CDH2,CLIC4,COL2A1,CRELD1,CRP,CTBP1,CTNNB1,CUL5,CYCS,DLG4,DNAJB6,DNAJC5,DNM1L,DUSP1,FAH,FKBP8,FOS,GABRA1,GABRB2,GABRG2,GAD2,GCLM,GDF11,GFER,GPHN,GRIA1,GRIA2,GRID2,GRIN1,GRIN2B,GRIN3A,GRM7,GSN,GSTP1,GSTZ1,GUCY1A2,HADHA,HK1,HMOX2,HOMER1,HSPA1…	126
Cell Death and Survival	Cell death of central nervous system cells	4.69e-09		0.17		CACNA2D2,CYCS,DLG4,DNM1L,DUSP1,FOS,GCLM,GRIA2,GRID2,GRIN1,GRIN2B,KCNJ6,MADD,MAOA,NFKBIA,NPTX1,NTRK3,PARK7,PPP1R9B,PRKAA1,SH3GL2,STX8,TGM1,TSC1	24
Cell Death and Survival	Necrosis	3.65e-08		-0.612		ADCY6,ALCAM,APMAP,APOB,ARHGEF6,ARMC10,ATP2A2,CA3,CACNA2D2,CACNB3,CAMK2D,CC2D1A,CD151,CD82,CD9,Cdc42,CDH2,CLIC4,COL2A1,CRP,CTBP1,CTNNB1,CYCS,DLG4,DNAJC5,DNM1L,DUSP1,FAH,FKBP8,FOS,GABRA1,GABRB2,GABRG2,GAD2,GCLM,GRIA1,GRIA2,GRID2,GRIN1,GRIN2B,GRIN3A,GRM7,GSN,GSTP1,GSTZ1,GUCY1A2,HADHA,HK1,HMOX2,HSPA1A/HSPA1B,IMMT,INHBA,IP6K1,KCNJ6,KCNMA1,LHX1,MADD,MAOA,MIIP,NAMPT,NBN,NCEH1,NDRG1,Nes,NFKBIA,NPTX1,NTRK…	102
Cell Death and Survival	Apoptosis of neurons	3.7e-08		0.246		CACNA2D2,Cdc42,CTNNB1,CYCS,DLG4,DNAJC5,DNM1L,DUSP1,FOS,GABRB2,GCLM,GRIA2,GRID2,GRIN1,GRIN2B,GRM7,KCNJ6,KCNMA1,MAOA,NBN,Nes,NFKBIA,NPTX1,NTRK3,PARK7,PPP1R9B,SNCB,STX8,SYNGAP1	29
Cell Death and Survival	Apoptosis	1.54e-06		-1.118		ACSL4,ADCY6,ALCAM,ANXA4,ARHGEF6,ARHGEF7,ARL6IP5,ARMC10,ATAT1,CA3,CACNA2D2,CAMK2D,CANX,CD151,CD82,CD9,Cdc42,CDH2,CLIC4,COL2A1,CRELD1,CRP,CTBP1,CTNNB1,CUL5,CYCS,DLG4,DNAJC5,DNM1L,DUSP1,FAH,FKBP8,FOS,GABRB2,GCLM,GDF11,GFER,GRIA2,GRID2,GRIN1,GRIN2B,GRM7,GSN,GSTP1,GSTZ1,HK1,HMOX2,HOMER1,HSPA1A/HSPA1B,IMMT,INHBA,KCNH8,KCNJ6,KCNMA1,KLHL20,MADD,MAOA,NAMPT,NBN,NCEH1,NDRG1,Nes,NFKBIA,NINJ1,NPTX1,NTRK3,OPA1…	95
Cell Death and Survival	Cellular degradation	4.19e-06		-1.541		ANK3,CACNA1D,CACNA2D2,Cdc42,DNM1L,GABRB2,GPHN,GRIA2,GRID2,GRIN1,GRIN2B,HSPA1A/HSPA1B,KCNJ6,KCNMA1,MARK2,NTRK3,PARK7,STMN1	18
Cell Death and Survival	Cell survival	0.000104	Increased	2.558	bias	AGTRAP,AK3,ALCAM,ANKS1B,APOB,CACNB3,CAMK2D,CASK,CC2D1A,CD151,CD82,CD9,CDH2,CTBP1,CTNNB1,DGKB,DNAJB6,DNM1L,DUSP1,FKBP1B,FOS,GAD2,GFER,GIT1,GSTP1,HK1,HMOX2,HSPA1A/HSPA1B,IP6K1,KCNJ6,LHX1,MRAS,NAMPT,NBN,NDRG1,Nes,NFKBIA,NTRK3,PARK7,PGRMC1,PHB2,PPM1G,PRKAA1,PTP4A2,PTPN9,PTPRN2,RBP1,RYR2,SNCB,STMN1,STX8,TGM1,TRIM28,TSC1,VDAC1,VKORC1	56
Cell Death and Survival	Cell viability	0.000153	Increased	2.697	bias	AGTRAP,AK3,ANKS1B,APOB,CACNB3,CAMK2D,CASK,CC2D1A,CD151,CD82,CD9,CDH2,CTBP1,CTNNB1,DGKB,DNAJB6,DNM1L,DUSP1,FKBP1B,FOS,GAD2,GFER,GIT1,GSTP1,HK1,HMOX2,HSPA1A/HSPA1B,IP6K1,KCNJ6,LHX1,MRAS,NAMPT,NBN,NDRG1,Nes,NFKBIA,NTRK3,PARK7,PGRMC1,PHB2,PPM1G,PRKAA1,PTP4A2,PTPN9,PTPRN2,RBP1,RYR2,STMN1,STX8,TRIM28,TSC1,VDAC1,VKORC1	53
Cell Death and Survival	Apoptosis of central nervous system cells	0.000223		-0.569		CACNA2D2,DNM1L,FOS,GCLM,KCNJ6,MAOA,NPTX1,NTRK3,PPP1R9B,PRKAA1,STX8	11
Cell Death and Survival	Anoikis of adenocarcinoma cell lines	0.000227				CD82,NDRG1	2
Cell Death and Survival, Cellular Compromise, Neurological Disease, Tissue Morphology	Degeneration of neurons	2.1e-05		-1.2	bias	ANK3,CACNA1D,CACNA2D2,DNM1L,GABRB2,GPHN,GRIA2,GRID2,GRIN1,GRIN2B,KCNJ6,KCNMA1,MARK2,NTRK3,PARK7,STMN1	16
Cell Death and Survival, Neurological Disease, Organismal Injury and Abnormalities	Cell death of brain cells	2.68e-08		0.233		CACNA2D2,CYCS,DLG4,DNM1L,DUSP1,FOS,GCLM,GRIA2,GRID2,GRIN1,GRIN2B,KCNJ6,MADD,MAOA,NFKBIA,NPTX1,NTRK3,PARK7,PPP1R9B,SH3GL2,TGM1,TSC1	22
Cell Death and Survival, Neurological Disease, Organismal Injury and Abnormalities	Cell death of cerebral cortex cells	2.46e-06		1.027		CYCS,DLG4,DUSP1,GCLM,GRIA2,GRIN1,GRIN2B,MADD,MAOA,NFKBIA,NPTX1,NTRK3,PARK7,PPP1R9B,SH3GL2,TGM1,TSC1	17
Cell Death and Survival, Organismal Injury and Abnormalities	Cell death of epithelial cells	0.000351		0.98		CA3,CD151,CDH2,CLIC4,CTNNB1,CYCS,DNM1L,FAH,FKBP8,FOS,GRIN2B,GSN,HK1,INHBA,MAOA,NAMPT,NDRG1,NFKBIA,NTRK3,PARK7,PRKAA1,SLC25A5,VDAC1	23
Cell Morphology	Shape change of neurons	3.36e-12		0.99		ARHGEF7,BSN,CD9,Cdc42,CDH2,CTNNB1,DBN1,DLG4,DNM1L,DPYSL5,ERC2,FOS,GIT1,GRIN1,GRIN3A,MAGI2,NFKBIA,NTRK3,OPA1,RIMS1,RYR2,SHANK2,SHANK3,SIPA1L1,SPTBN2,SRCIN1,SYNGAP1,TRIM9,TSC1,VAMP7	30
Cell Morphology	Abnormal morphology of plasma membrane	2.58e-11				CACNA1D,DLG3,DNAJC5,ERC2,GABRA1,GPHN,GRID2,MADD,MPP4,Nes,NPTX1,PRKAA1,REN,SH3GL2,SHANK3,UNC13A	16
Cell Morphology	Sprouting	3.05e-09		0.958		ARHGEF7,BSN,Cdc42,CDH2,CTNNB1,DBN1,DLG4,DNM1L,DPYSL5,ERC2,FOS,GIT1,GRIN1,GRIN3A,MAGI2,NFKBIA,NTRK3,OPA1,RIMS1,RYR2,SHANK2,SHANK3,SHROOM2,SIPA1L1,SPTBN2,SRCIN1,SYNGAP1,TRIM9,TSC1,VAMP7	30
Cell Morphology	Morphology of cellular protrusions	2.82e-05				CACNA1D,CACNA2D2,CC2D1A,DLG3,DPYSL5,DUSP1,FOS,GIT1,GRIA1,GRID2,GRIN3A,KATNA1,MARK2,NAMPT,NFKBIA,PLEC,SH3GL2,SYNGAP1	18
Cell Morphology, Cell-To-Cell Signaling and Interaction, Cellular Assembly and Organization	Morphology of intercellular junctions	1.38e-11				AFDN,CACNA1D,CDH2,DLG3,DNAJC5,ERC2,GABRA1,GPHN,GRID2,MADD,Nes,NPTX1,PLEC,PRKAA1,SH3GL2,SHANK3,SNCB,UNC13A	18
Cell Morphology, Cell-To-Cell Signaling and Interaction, Cellular Assembly and Organization, Nervous System Development and Function, Neurological Disease, Tissue Morphology	Abnormal morphology of synapse	1.43e-10				CACNA1D,DLG3,DNAJC5,ERC2,GABRA1,GPHN,GRID2,MADD,Nes,NPTX1,PRKAA1,SH3GL2,SHANK3,UNC13A	14
Cell Morphology, Cell-To-Cell Signaling and Interaction, Cellular Assembly and Organization, Nervous System Development and Function, Tissue Morphology	Morphology of synapse	4.06e-12				CACNA1D,CDH2,DLG3,DNAJC5,ERC2,GABRA1,GPHN,GRID2,MADD,Nes,NPTX1,PRKAA1,SH3GL2,SHANK3,SNCB,UNC13A	16
Cell Morphology, Cell-To-Cell Signaling and Interaction, Nervous System Development and Function	Plasticity of synapse	1.29e-10	Increased	2.36	bias	ARHGEF9,DBN1,DLG4,DLGAP3,GRIA1,GRIA2,GRIN1,GRIN2B,Kcnn2,NCDN,PIP5K1C,RIMBP2,RIMS1,SHANK3,SIPA1L1,SRCIN1,SYNGAP1	17
Cell Morphology, Cell-To-Cell Signaling and Interaction, Nervous System Development and Function	Plasticity of neuronal synapse	0.000301				GRIN1,GRIN2B,Kcnn2,NCDN	4
Cell Morphology, Cellular Assembly and Organization	Shortening of actin filaments	0.000227				GSN,TMOD1	2
Cell Morphology, Cellular Assembly and Organization	Elongation of mitochondria	0.000379				DNM1L,GFER,OPA1	3
Cell Morphology, Cellular Assembly and Organization, Cellular Development, Cellular Function and Maintenance, Cellular Growth and Proliferation, Embryonic Development, Nervous System Development and Function, Neurological Disease, Organismal Development, Tissue Development, Tissue Morphology	Abnormal morphology of dendritic spines	9e-07				DBN1,DLG4,GIT1,GRIN1,SHANK2,SHANK3,SRCIN1,SYNGAP1	8
Cell Morphology, Cellular Assembly and Organization, Cellular Development, Cellular Function and Maintenance, Cellular Growth and Proliferation, Embryonic Development, Nervous System Development and Function, Organismal Development, Tissue Development	Branching of neurites	1.64e-10		1.538		ARHGEF7,BSN,Cdc42,CDH2,CTNNB1,DBN1,DLG4,DNM1L,DPYSL5,FOS,GIT1,GRIN1,GRIN3A,MAGI2,NTRK3,OPA1,RIMS1,RYR2,SHANK2,SHANK3,SIPA1L1,SPTBN2,SRCIN1,SYNGAP1,TRIM9,TSC1,VAMP7	27
Cell Morphology, Cellular Assembly and Organization, Cellular Development, Cellular Function and Maintenance, Cellular Growth and Proliferation, Embryonic Development, Nervous System Development and Function, Organismal Development, Tissue Development	Dendritic growth/branching	4.58e-09		0.965		ARHGEF7,BSN,CDH2,CTNNB1,DBN1,DLG4,DNM1L,DPYSL5,GIT1,GRIN1,GRIN3A,MAGI2,OPA1,RYR2,SHANK2,SHANK3,SIPA1L1,SPTBN2,SRCIN1,SYNGAP1,TSC1,VAMP7	22
Cell Morphology, Cellular Assembly and Organization, Cellular Development, Cellular Function and Maintenance, Cellular Growth and Proliferation, Embryonic Development, Nervous System Development and Function, Organismal Development, Tissue Development, Tissue Morphology	Morphology of dendritic spines	5.16e-08				ARHGEF7,CDH2,DBN1,DLG4,GIT1,GRIN1,MAGI2,SHANK2,SHANK3,SIPA1L1,SRCIN1,SYNGAP1	12
Cell Morphology, Cellular Assembly and Organization, Cellular Development, Cellular Function and Maintenance, Cellular Growth and Proliferation, Nervous System Development and Function, Organismal Development, Tissue Development	Neuritogenesis	2.38e-17		1.291		ANK3,ARHGEF7,ATL1,ATRN,BSN,CC2D1A,Cdc42,CDH2,CTNNB1,DBN1,DLG4,DNM1L,DPYSL5,ERC2,FOS,GIT1,GRID2,GRIN1,GRIN3A,INHBA,LHX1,LLGL1,MAGI2,MARK2,MRAS,NCDN,NFKBIA,NLGN1,NPTXR,NTRK3,OPA1,PIP5K1C,PLPPR4,PPP1R9B,PPP2R2C,RIMS1,RTN3,RYR2,SH3GL2,SHANK2,SHANK3,SIPA1L1,SNCB,SNX1,SPTBN2,SRCIN1,STMN1,SYNGAP1,TRIM9,TSC1,VAMP7,ZFYVE27	52
Cell Morphology, Cellular Assembly and Organization, Cellular Development, Cellular Function and Maintenance, Cellular Growth and Proliferation, Nervous System Development and Function, Organismal Development, Tissue Development	Branching of neurons	1.13e-11		0.797		ARHGEF7,BSN,Cdc42,CDH2,CTNNB1,DBN1,DLG4,DNM1L,DPYSL5,ERC2,FOS,GIT1,GRIN1,GRIN3A,MAGI2,NFKBIA,NTRK3,OPA1,RIMS1,RYR2,SHANK2,SHANK3,SIPA1L1,SPTBN2,SRCIN1,SYNGAP1,TRIM9,TSC1,VAMP7	29
Cell Morphology, Cellular Assembly and Organization, Cellular Development, Cellular Function and Maintenance, Cellular Growth and Proliferation, Nervous System Development and Function, Organismal Development, Tissue Development	Axonogenesis	5.45e-07		0.436		ANK3,ATL1,Cdc42,CDH2,FOS,GRID2,GRIN1,LHX1,LLGL1,MARK2,NTRK3,PIP5K1C,PLPPR4,RIMS1,SIPA1L1,STMN1,SYNGAP1,TRIM9	18
Cell Morphology, Cellular Assembly and Organization, Cellular Function and Maintenance	Formation of cellular protrusions	1.62e-14		1.346	bias	ANK3,ARHGEF6,ARHGEF7,ARHGEF9,ATL1,ATRN,BSN,CC2D1A,CD82,CD9,Cdc42,CDH2,CTNNB1,DBN1,DGKG,DLG4,DNM1L,DPYSL5,ERC2,Exoc7,FOS,GIT1,GRID2,GRIN1,GRIN3A,GSN,INHBA,LHX1,LLGL1,MAGI2,MARK2,MRAS,NCDN,NFKBIA,NINJ1,NLGN1,NPTXR,NTRK3,OPA1,PIP5K1C,PLEC,PLPPR4,PPP1R9B,PPP2R2C,RIMS1,RTN3,RYR2,SH3GL2,SHANK2,SHANK3,SIPA1L1,SNCB,SNX1,SPTBN2,SRCIN1,STMN1,SYNGAP1,TRIM9,TSC1,VAMP7,ZFYVE27	61
Cell Morphology, Cellular Assembly and Organization, Cellular Function and Maintenance	Extension of cellular protrusions	1.07e-05		1.343	bias	ADCY6,CD82,CD9,CDH2,CTNNB1,DBN1,DPYSL5,GRIN1,GSN,INHBA,NTRK3,Ppp1cc,PTPRS,TSC1,ZFYVE27	15
Cell Morphology, Cellular Assembly and Organization, Cellular Function and Maintenance	Transmembrane potential of cellular membrane	0.000322				CLIC4,CNIH2,CYCS,GRIN1,KCNMA1,OPA1,PHB2,RIMS1	8
Cell Morphology, Cellular Development	Branching of cells	5.09e-11		0.64		ADCY6,ARHGEF7,BSN,Cdc42,CDH2,CTNNB1,DBN1,DLG4,DNM1L,DPYSL5,ERC2,ERMN,FOS,GIT1,GRIN1,GRIN3A,MAGI2,NFKBIA,NTRK3,OPA1,PAM,RIMS1,RYR2,SHANK2,SHANK3,SIPA1L1,SPTBN2,SRCIN1,SYNGAP1,TRIM9,TSC1,VAMP7	32
Cell Morphology, Cellular Function and Maintenance	Transmembrane potential	4.88e-07		0.249		CLIC4,CNIH2,CYCS,DNM1L,GABRA1,GPD2,GRIN1,GSN,IMMT,KCNMA1,NDRG1,NFKBIA,OPA1,PARK7,PHB2,RIMS1,STOML2,TMEM38A,TRPV1,VDAC1	20
Cell Morphology, Cellular Function and Maintenance	Transmembrane potential of mitochondria	6e-05		0.514		CLIC4,CYCS,DNM1L,GPD2,GSN,IMMT,NDRG1,NFKBIA,OPA1,PARK7,PHB2,STOML2,TRPV1,VDAC1	14
Cell Morphology, Cellular Movement, Nervous System Development and Function	Innervation of neurons	9.66e-05				CACNA1D,CACNB3,GABRB2,GRIA2,GRID2,KCNMA1,NTRK3,RIMS1	8
Cell Morphology, Cellular Movement, Nervous System Development and Function	Innervation of hair cells	0.000132				CACNA1D,GABRB2,KCNMA1,NTRK3	4
Cell Morphology, Nervous System Development and Function	Innervation of tissue	4.05e-07				CACNA1D,CACNB3,DLG3,DLG4,GABRB2,GRIA2,GRID2,KCNMA1,NPTX1,NPTXR,NTRK3,RIMS1	12
Cell Morphology, Nervous System Development and Function	Innervation	2.42e-06				CACNA1D,CACNB3,DLG3,DLG4,GABRB2,GRIA2,GRID2,KCNMA1,NPTX1,NPTXR,NTRK3,RIMS1,UNC13A	13
Cell Morphology, Nervous System Development and Function, Neurological Disease, Tissue Morphology	Abnormal morphology of neurons	1.99e-12				ARHGEF9,CACNA1D,CC2D1A,DBN1,DLG3,DLG4,DNAJC5,DUSP1,ERC2,GABRA1,GDF11,GIT1,GPHN,GRIA1,GRID2,GRIN1,GRIN3A,MADD,MAGI2,MARK2,Nes,NPTX1,NTRK3,PARK7,PHB2,PLEC,PPP1R9B,PRKAA1,PTPRS,RIMS1,SH3GL2,SHANK1,SHANK2,SHANK3,SNPH,SRCIN1,SYN1,SYNGAP1,UNC13A	39
Cell Morphology, Nervous System Development and Function, Neurological Disease, Tissue Morphology	Abnormal morphology of dendrites	9.77e-05				CC2D1A,DUSP1,GIT1,GRIA1,GRID2,GRIN3A,SYNGAP1	7
Cell Morphology, Nervous System Development and Function, Neurological Disease, Tissue Morphology	Abnormal morphology of neurites	0.000156				CC2D1A,DLG3,DUSP1,GIT1,GRIA1,GRID2,GRIN3A,MARK2,PLEC,SH3GL2,SYNGAP1	11
Cell Morphology, Nervous System Development and Function, Tissue Morphology	Morphology of neurons	1.46e-19				ARHGEF7,ARHGEF9,ATAT1,CACNA1D,CACNA2D2,CACNA2D3,CC2D1A,CD9,Cdc42,CDH2,DBN1,DLG3,DLG4,DNAJC5,DPYSL5,DUSP1,ERC2,FOS,GABRA1,GDF11,GIT1,GPHN,GRIA1,GRID2,GRIN1,GRIN3A,JAM3,KATNA1,MADD,MAGI2,MARK2,NAMPT,Nes,NFKBIA,NPTX1,NTRK3,PARK7,PHB2,PLEC,PPP1R9B,PRKAA1,PTPRS,RIMS1,SH3GL2,SHANK1,SHANK2,SHANK3,SIPA1L1,SNCB,SNPH,SRCIN1,SYN1,SYNGAP1,TSC1,UNC13A	55
Cell Morphology, Nervous System Development and Function, Tissue Morphology	Morphology of dendrites	1.95e-06				CACNA2D2,CC2D1A,DPYSL5,DUSP1,GIT1,GRIA1,GRID2,GRIN3A,NAMPT,NFKBIA,SYNGAP1	11
Cell Morphology, Nervous System Development and Function, Tissue Morphology	Morphology of neurites	3.7e-06				CACNA2D2,CC2D1A,DLG3,DPYSL5,DUSP1,FOS,GIT1,GRIA1,GRID2,GRIN3A,KATNA1,MARK2,NAMPT,NFKBIA,PLEC,SH3GL2,SYNGAP1	17
Cell Morphology, Nervous System Development and Function, Tissue Morphology	Size of neurons	6.78e-05				CACNA2D3,Cdc42,DLG4,DPYSL5,GRID2,SIPA1L1,SNCB,SYN1,TSC1	9
Cell Signaling	Small GTPase mediated signal transduction	9.33e-05		0		ARHGEF11,ARHGEF7,ARHGEF9,CAMK2D,Cdc42,CDH2,COL3A1,HACE1,MRAS,PARK7,STMN1,SYNGAP1,TRIM28	13
Cell Signaling, Molecular Transport, Vitamin and Mineral Metabolism	Transport of Ca2+	5.51e-10				ATP2A2,CACNA1D,CACNA2D1,CACNA2D2,CACNA2D3,CACNB3,CAMK2D,GRIN1,GRIN2B,GRIN3A,MICU1,RYR2,STOML2,TMEM165,TRPV1,VDAC1	16
Cell Signaling, Molecular Transport, Vitamin and Mineral Metabolism	Concentration of Ca2+	0.000428		-0.447	bias	ATP2A2,CACNA2D1,CACNB3,GRIN2B,GSN,HOMER1,KCNJ6,TMEM38A,TRPV1	9
Cell-To-Cell Signaling and Interaction	Synaptic depression	5.79e-20		-0.394		ARHGEF9,DLG4,DLGAP3,DPYSL5,GRIA1,GRIA2,GRID2,GRIN1,GRIN2B,GRM7,HOMER1,KCNMA1,NFKBIA,PARK7,PCLO,PIP5K1C,PPP1R14A,PPP1R9B,RIMS1,SH3GL2,SHANK2,SHANK3,SRCIN1,SYN1,SYNJ1,TRPV1,UNC13A	27
Cell-To-Cell Signaling and Interaction, Cellular Assembly and Organization	Cell-cell contact	1.74e-17		1.777		ADGRL1,AFDN,ALCAM,ANK3,ARHGEF7,BSN,CACNA1D,CACNA2D2,CAMK2D,CC2D1A,CD151,CD9,Cdc42,CDH2,CTNNB1,DLG3,DLG4,DLGAP3,DNAJC5,DNM1L,ERC2,GABRA1,GABRG2,GIT1,GPHN,GRIA1,GRID2,GRIN1,GRIN2B,INHBA,JAM3,LRRC4B,MADD,Nes,NLGN1,NLGN2,NPTX1,NTRK3,PIP5K1C,PLEC,PRKAA1,RASGRF2,SH3GL2,SHANK1,SHANK2,SHANK3,SNCB,SPTBN2,SYN1,SYNGAP1,TRPV1,UNC13A,USP19	53
Cell-To-Cell Signaling and Interaction, Cellular Assembly and Organization	Formation of cell-cell contacts	4.77e-14		1.87	bias	ADGRL1,AFDN,ARHGEF7,BSN,CACNA2D2,CC2D1A,CDH2,CTNNB1,DLG3,DLG4,DLGAP3,DNM1L,GPHN,GRIA1,GRID2,GRIN1,INHBA,LRRC4B,NLGN1,NLGN2,NTRK3,PIP5K1C,SHANK1,SHANK2,SHANK3,SPTBN2,SYN1,SYNGAP1,TRPV1,UNC13A	30
Cell-To-Cell Signaling and Interaction, Cellular Assembly and Organization	Formation of intercellular junctions	2.14e-13		1.697	bias	ADGRL1,AFDN,ARHGEF7,BSN,CACNA2D2,CC2D1A,CDH2,CTNNB1,DLG3,DLG4,DLGAP3,DNM1L,GPHN,GRIA1,GRID2,GRIN1,INHBA,LRRC4B,NLGN1,NLGN2,NTRK3,SHANK1,SHANK2,SHANK3,SPTBN2,SYN1,SYNGAP1,TRPV1,UNC13A	29
Cell-To-Cell Signaling and Interaction, Cellular Assembly and Organization, Cellular Development, Cellular Function and Maintenance, Cellular Growth and Proliferation, Nervous System Development and Function, Tissue Development	Developmental process of synapse	1.32e-14		1.959	bias	ADGRL1,ARHGEF7,BSN,CACNA2D2,CC2D1A,CDH2,CTNNB1,DLG3,DLG4,DLGAP3,DNM1L,GPHN,GRIA1,GRID2,GRIN1,LRRC4B,NLGN1,NLGN2,NTRK3,SHANK1,SHANK2,SHANK3,SPTBN2,SYN1,SYNGAP1,TRPV1,UNC13A	27
Cell-To-Cell Signaling and Interaction, Cellular Assembly and Organization, Cellular Function and Maintenance	Assembly of intercellular junctions	3.51e-13		1.697	bias	ADGRL1,ARHGEF7,BSN,CACNA2D2,CC2D1A,CDH2,CTNNB1,DLG3,DLG4,DLGAP3,DNM1L,GPHN,GRIA1,GRID2,GRIN1,INHBA,LRRC4B,NLGN1,NLGN2,NTRK3,SHANK1,SHANK2,SHANK3,SPTBN2,SYN1,SYNGAP1,TRPV1,UNC13A	28
Cell-To-Cell Signaling and Interaction, Cellular Assembly and Organization, Cellular Function and Maintenance, Nervous System Development and Function, Tissue Development	Function of synapse	0.000104				DLG4,GRID2,NLGN1,NLGN2	4
Cell-To-Cell Signaling and Interaction, Cellular Assembly and Organization, Cellular Function and Maintenance, Tissue Development	Organization of synapse	0.000143				ANK3,CTNNB1,NLGN1,NLGN2,SNCB,TSC1	6
Cell-To-Cell Signaling and Interaction, Cellular Assembly and Organization, Hematological System Development and Function, Immune Cell Trafficking	Cell-cell contact of dendritic cells	0.000227				ALCAM,NPTX1	2
Cell-To-Cell Signaling and Interaction, Cellular Assembly and Organization, Nervous System Development and Function, Tissue Morphology	Quantity of synapse	1.63e-08		-0.269		ARHGEF7,BSN,CAMK2D,DLGAP3,DNM1L,GABRG2,GIT1,GRIN1,GRIN2B,NLGN1,NPTX1	11
Cell-To-Cell Signaling and Interaction, Cellular Assembly and Organization, Nervous System Development and Function, Tissue Morphology	Quantity of excitatory synapses	4.06e-06		0	bias	CAMK2D,GRIN1,GRIN2B,NLGN1,NPTX1	5
Cell-To-Cell Signaling and Interaction, Molecular Transport, Small Molecule Biochemistry	Release of neurotransmitter	5.34e-07		1.812		ARHGEF7,CD9,Cdc42,GAD2,GRIN1,GSN,KCNQ2,PARK7,PCLO,RIMS1,SNPH,SYN1,TRPV1,UNC13A	14
Cell-To-Cell Signaling and Interaction, Nervous System Development and Function	Neurotransmission	1.35e-30	Increased	2.718		ANK3,ANKS1B,ARHGEF9,BSN,CACNA1D,CACNA2D3,CACNB3,CDH2,CDH8,CNIH2,CTNNB1,DLG4,DLGAP1,DLGAP3,DNAJC5,ERC2,GABRA1,GABRB2,GABRG2,GAD2,GRIA1,GRIA2,GRID2,GRIN1,GRIN2B,GRIN3A,GRM7,HOMER1,KCNJ6,KCNMA1,Kcnn2,KCNQ2,KCNQ3,KCNT2,MAOA,NFKBIA,NLGN1,NLGN2,NPTX1,PARK7,PIP5K1C,PPP1R9B,PTPRS,RIMBP2,RIMS1,SH3GL2,SHANK2,SHANK3,SNCB,SNPH,SRCIN1,SYN1,SYNGAP1,TRPV1,UNC13A,VDAC1	56
Cell-To-Cell Signaling and Interaction, Nervous System Development and Function	Synaptic transmission	9.91e-28	Increased	2.701		ANKS1B,BSN,CACNA2D3,CACNB3,CDH2,CDH8,CNIH2,CTNNB1,DLG4,DLGAP1,DLGAP3,DNAJC5,ERC2,GABRA1,GABRB2,GABRG2,GAD2,GRIA1,GRIA2,GRID2,GRIN1,GRIN2B,GRIN3A,GRM7,HOMER1,KCNJ6,KCNMA1,KCNQ2,KCNQ3,NFKBIA,NLGN1,NLGN2,NPTX1,PARK7,PIP5K1C,PPP1R9B,PTPRS,RIMBP2,RIMS1,SH3GL2,SHANK3,SNCB,SNPH,SYN1,SYNGAP1,TRPV1,UNC13A,VDAC1	48
Cell-To-Cell Signaling and Interaction, Nervous System Development and Function	Action potential of neurons	2.61e-14		0.577		ANK3,ARHGEF9,CACNA1D,DLGAP3,GABRA1,GRIA1,GRIA2,GRID2,GRIN2B,KCNMA1,Kcnn2,KCNQ2,KCNT2,PARK7,RIMS1,SHANK2,SHANK3,SRCIN1,SYN1,SYNGAP1,TRPV1	21
Cell-To-Cell Signaling and Interaction, Nervous System Development and Function	Long term depression	2.98e-14		1.301	bias	ARHGEF9,DLG4,DPYSL5,GRIA1,GRIA2,GRID2,GRIN1,GRIN2B,GRM7,HOMER1,NFKBIA,PARK7,PIP5K1C,PPP1R14A,PPP1R9B,RIMS1,SHANK2,SHANK3,SRCIN1,TRPV1	20
Cell-To-Cell Signaling and Interaction, Nervous System Development and Function	Action potential of cells	4.27e-14		0		ANK3,ARHGEF9,CACNA1D,CDH2,DLGAP3,GABRA1,GRIA1,GRIA2,GRID2,GRIN2B,KCNMA1,Kcnn2,KCNQ2,KCNT2,PARK7,RIMS1,SHANK2,SHANK3,SRCIN1,SYN1,SYNGAP1,TRPV1	22
Cell-To-Cell Signaling and Interaction, Nervous System Development and Function	Synaptic transmission of cells	1.93e-13	Increased	2.295		ANKS1B,BSN,CDH2,DLG4,DLGAP3,ERC2,GRIA1,GRIA2,GRIN1,GRIN2B,GRIN3A,HOMER1,KCNMA1,NLGN2,PTPRS,RIMS1,SH3GL2,SHANK3,SNPH,TRPV1	20
Cell-To-Cell Signaling and Interaction, Nervous System Development and Function	Long-term potentiation	2.26e-13		1.259		ARHGEF9,CACNB3,CDH2,DLG3,DLG4,GABRG2,GRIA1,GRIA2,GRIN1,GRIN2B,GRM7,GUCY1A2,MPP2,NLGN1,NPTX1,NTRK3,RASGRF2,RIMS1,SHANK2,SHANK3,SPTBN2,SRCIN1,SYNGAP1,SYNJ1,TMEM35A,TRPV1,UNC13A,VDAC1	28
Cell-To-Cell Signaling and Interaction, Nervous System Development and Function	Synaptic transmission of nervous tissue	5.83e-13	Increased	2.67		ANKS1B,BSN,CACNA2D3,DLGAP3,ERC2,GRIA1,GRIA2,GRIN1,GRIN2B,HOMER1,PTPRS,RIMS1,SH3GL2,SHANK3,SNCB,SNPH,TRPV1,VDAC1	18
Cell-To-Cell Signaling and Interaction, Nervous System Development and Function	Long term depression of synapse	4.44e-11		1.414	bias	ARHGEF9,DPYSL5,GRIA1,GRIA2,GRIN1,GRIN2B,GRM7,PPP1R9B,RIMS1,SHANK2,SHANK3,SRCIN1,TRPV1	13
Cell-To-Cell Signaling and Interaction, Nervous System Development and Function	Excitatory postsynaptic potential	6.78e-10				ARHGEF9,DLGAP3,GRIA2,GRID2,GRIN1,GRIN2B,MADD,MPP2,PIP5K1C,RIMS1,SH3GL2,SHANK2,SHANK3,SRCIN1,SYN1,SYNGAP1	16
Cell-To-Cell Signaling and Interaction, Nervous System Development and Function	Synaptic transmission of cerebral cortex cells	1.76e-08	Increased	2.771		ANKS1B,ERC2,GRIA1,GRIA2,GRIN1,GRIN2B,HOMER1,PTPRS,SH3GL2,SHANK3	10
Cell-To-Cell Signaling and Interaction, Nervous System Development and Function	Synaptic transmission of hippocampal neurons	4.67e-08	Increased	2.574	bias	ANKS1B,ERC2,GRIA1,GRIN1,GRIN2B,PTPRS,SHANK3	7
Cell-To-Cell Signaling and Interaction, Nervous System Development and Function	Synaptic transmission of hippocampal cells	6.55e-08	Increased	2.762	bias	ANKS1B,ERC2,GRIA1,GRIN1,GRIN2B,HOMER1,PTPRS,SHANK3	8
Cell-To-Cell Signaling and Interaction, Nervous System Development and Function	Excitatory postsynaptic potential of neurons	1.26e-07				ARHGEF9,DLGAP3,GRIA2,GRIN2B,RIMS1,SHANK2,SHANK3,SRCIN1,SYN1,SYNGAP1	10
Cell-To-Cell Signaling and Interaction, Nervous System Development and Function	Inhibitory postsynaptic current	1.63e-06				ARHGEF9,CC2D1A,DAGLA,ERC2,GABRA1,PIP5K1C,RIMS1,SYN1	8
Cell-To-Cell Signaling and Interaction, Nervous System Development and Function	Excitatory postsynaptic current	4.52e-06				CC2D1A,DAGLA,GRID2,MADD,RIMBP2,RIMS1,SHANK3,SYNGAP1,UNC13A	9
Cell-To-Cell Signaling and Interaction, Nervous System Development and Function	Long term depression of cells	5.43e-06		0.834	bias	DLG4,GRIA1,GRIA2,GRID2,PARK7,PIP5K1C,PPP1R14A	7
Cell-To-Cell Signaling and Interaction, Nervous System Development and Function	NMDA-mediated synaptic current	5.56e-06				CACNB3,DLG4,DLGAP3,GRIN2B,SHANK3	5
Cell-To-Cell Signaling and Interaction, Nervous System Development and Function	AMPA mediated synaptic current	6.06e-06				DLG4,GRIA2,GRIN2B,PPP1R9B	4
Cell-To-Cell Signaling and Interaction, Nervous System Development and Function	Glutamate mediated receptor currents	3.28e-05				DLG4,GRIN1,PIP5K1C,SYNGAP1	4
Cell-To-Cell Signaling and Interaction, Nervous System Development and Function	Abnormal synaptic transmission	3.86e-05				DNAJC5,KCNJ6,RIMBP2,SHANK3,UNC13A	5
Cell-To-Cell Signaling and Interaction, Nervous System Development and Function	Long term depression of hippocampal CA1 region	3.86e-05		1	bias	DLG4,GRIA2,GRIN1,GRIN2B,PIP5K1C	5
Cell-To-Cell Signaling and Interaction, Nervous System Development and Function	Action potential of brain cells	4.54e-05				ANK3,GABRA1,KCNQ2,TRPV1	4
Cell-To-Cell Signaling and Interaction, Nervous System Development and Function	GABA-mediated receptor currents	4.54e-05				GABRA1,GABRB2,GABRG2,GRID2	4
Cell-To-Cell Signaling and Interaction, Nervous System Development and Function	Long term depression of neurons	5.62e-05		1.162	bias	DLG4,GRIA1,GRIA2,GRID2,PARK7,PIP5K1C	6
Cell-To-Cell Signaling and Interaction, Nervous System Development and Function	Synaptic transmission of superior cervical ganglion neurons	0.000114				BSN,RIMS1,SNPH	3
Cell-To-Cell Signaling and Interaction, Nervous System Development and Function	Long-term potentiation of brain	0.000115		-0.01		CDH2,DLG4,GRIA1,GRIA2,GRIN1,GRIN2B,GUCY1A2,RIMS1,SPTBN2,SYNJ1	10
Cell-To-Cell Signaling and Interaction, Nervous System Development and Function	Long term depression of brain cells	0.000196		1.985	bias	DLG4,GRIA1,GRIA2,GRID2,PIP5K1C	5
Cell-To-Cell Signaling and Interaction, Nervous System Development and Function	Binding of neurons	0.000225				CACNA2D2,CDH2,GRIN1,NLGN1,NLGN2,SHANK2,UNC13A	7
Cell-To-Cell Signaling and Interaction, Nervous System Development and Function	Action potential of cerebral cortex cells	0.000379				ANK3,GABRA1,KCNQ2	3
Cell-To-Cell Signaling and Interaction, Nervous System Development and Function	Miniature inhibitory postsynaptic current	0.000428				CC2D1A,GABRA1,GRID2,SYNGAP1	4
Cellular Assembly and Organization	Formation of plasma membrane	1.68e-14	Increased	2.071	bias	ADGRL1,AFDN,ARHGEF7,BSN,CACNA2D2,CC2D1A,CDH2,CTNNB1,DLG3,DLG4,DLGAP3,DNM1L,GPHN,GRIA1,GRID2,GRIN1,INHBA,LRRC4B,NLGN1,NLGN2,NTRK3,PIP5K1C,SHANK1,SHANK2,SHANK3,SPTBN2,SYN1,SYNGAP1,TRPV1,UNC13A	30
Cellular Assembly and Organization	Transport of vesicles	4.01e-10		0.655	bias	CANX,CTNNB1,DNAJC5,MARK2,MYO1C,NLGN1,PCLO,PIP5K1C,RAB9A,RIMS1,SCFD1,SH3GL2,SNCB,SPTBN2,SYNJ1,VAMP7	16
Cellular Assembly and Organization	Quantity of vesicles	8.5e-09		1.408		BSN,ERC2,MADD,NTRK3,PCLO,PRKAA1,PTPRN2,RIMS1,SH3GL2,SNX1,SYN1,SYNJ1,UNC13A	13
Cellular Assembly and Organization	Organization of organelle	3.21e-07				ANK3,ARHGEF7,ATL1,ATP2A2,Cdc42,COL2A1,COL3A1,CTNNB1,DBN1,DLG3,DLG4,DNAJB6,DNM1L,ERMN,GOLPH3L,GORASP2,GSN,HACE1,KATNA1,NLGN1,NLGN2,OPA1,PARK7,PHB2,PPP1R9B,SHROOM2,SNCB,STOML2,STX6,TMOD1,TSC1,ZW10	32
Cellular Assembly and Organization	Clustering of vesicles	1.36e-06		1		BSN,MADD,NLGN1,PCLO,SYN1	5
Cellular Assembly and Organization	Clustering of synaptic vesicles	1.73e-06				BSN,NLGN1,PCLO,SYN1	4
Cellular Assembly and Organization	Fusion of vesicles	0.000192				BSN,GAD2,MYO1C,STX6,STX8,UNC13A,VAMP7	7
Cellular Assembly and Organization, Cellular Function and Maintenance	Organization of cytoplasm	1.52e-16	Increased	2.002	bias	ADCY6,ANK3,ARHGEF6,ARHGEF7,ARHGEF9,ATL1,ATRN,BSN,CANX,CC2D1A,CD82,CD9,Cdc42,CDH2,CTNNB1,DBN1,DGKG,DLG3,DLG4,DNAJB6,DNM1L,DPYSL5,ERC2,ERMN,Exoc7,FOS,GIT1,GOLPH3L,GORASP2,GRID2,GRIN1,GRIN2B,GRIN3A,GSN,HACE1,INHBA,KATNA1,LHX1,LLGL1,Macf1,MAGI2,MAOA,MARK2,MRAS,NCDN,NDRG1,NFKBIA,NINJ1,NLGN1,NPTXR,NTRK3,OPA1,PAM,PARK7,PCLO,PHB2,PIP5K1C,PLEC,PLPPR4,Ppp1cc,PPP1R9B,PPP2R2C,PRKAA1,PRUNE1,PTPRS,RIMS1,RTN3,R…	88
Cellular Assembly and Organization, Cellular Function and Maintenance	Microtubule dynamics	1.08e-15	Increased	2.031	bias	ADCY6,ANK3,ARHGEF6,ARHGEF7,ARHGEF9,ATL1,ATRN,BSN,CANX,CC2D1A,CD82,CD9,Cdc42,CDH2,CTNNB1,DBN1,DGKG,DLG3,DLG4,DNM1L,DPYSL5,ERC2,Exoc7,FOS,GIT1,GRID2,GRIN1,GRIN2B,GRIN3A,GSN,INHBA,KATNA1,LHX1,LLGL1,Macf1,MAGI2,MAOA,MARK2,MRAS,NCDN,NDRG1,NFKBIA,NINJ1,NLGN1,NPTXR,NTRK3,OPA1,PIP5K1C,PLEC,PLPPR4,Ppp1cc,PPP1R9B,PPP2R2C,PRKAA1,PRUNE1,PTPRS,RIMS1,RTN3,RYR2,SH3GL2,SHANK2,SHANK3,SIPA1L1,SNCB,SNX1,SPTBN2,SRCI…	74
Cellular Assembly and Organization, Cellular Function and Maintenance	Organization of cytoskeleton	7.02e-15	Increased	2.002	bias	ADCY6,ANK3,ARHGEF6,ARHGEF7,ARHGEF9,ATL1,ATRN,BSN,CANX,CC2D1A,CD82,CD9,Cdc42,CDH2,CTNNB1,DBN1,DGKG,DLG3,DLG4,DNAJB6,DNM1L,DPYSL5,ERC2,ERMN,Exoc7,FOS,GIT1,GRID2,GRIN1,GRIN2B,GRIN3A,GSN,INHBA,KATNA1,LHX1,LLGL1,Macf1,MAGI2,MAOA,MARK2,MRAS,NCDN,NDRG1,NFKBIA,NINJ1,NLGN1,NPTXR,NTRK3,OPA1,PAM,PCLO,PIP5K1C,PLEC,PLPPR4,Ppp1cc,PPP1R9B,PPP2R2C,PRKAA1,PRUNE1,PTPRS,RIMS1,RTN3,RYR2,SH3GL2,SHANK2,SHANK3,SHROOM2,…	80
Cellular Assembly and Organization, Cellular Function and Maintenance	Quantity of cellular protrusions	9.51e-06		0.847		ARHGEF7,CANX,CTNNB1,DLG3,DNM1L,FOS,GIT1,GRIN1,GSN,KATNA1,MAOA,NINJ1,NTRK3	13
Cellular Assembly and Organization, Cellular Function and Maintenance	Organization of filaments	5.31e-05				ATP2A2,Cdc42,COL2A1,COL3A1,DBN1,DLG3,DLG4,DNAJB6,ERMN,GSN,KATNA1,PPP1R9B,SHROOM2,TMOD1	14
Cellular Assembly and Organization, Cellular Function and Maintenance, Cellular Movement, Nervous System Development and Function	Endocytosis of synaptic vesicles	9.38e-05				CANX,PIP5K1C,SH3GL2,SNCB,SYNJ1	5
Cellular Assembly and Organization, Cellular Function and Maintenance, Nervous System Development and Function	Release of synaptic vesicles	0.000114				RIMBP2,RIMS1,VAMP7	3
Cellular Assembly and Organization, Cellular Movement, Nervous System Development and Function	Transport of synaptic vesicles	1.05e-08				CANX,CTNNB1,DNAJC5,NLGN1,PCLO,PIP5K1C,RIMS1,SH3GL2,SNCB,SPTBN2,SYNJ1	11
Cellular Assembly and Organization, Nervous System Development and Function	Recycling of synaptic vesicles	3.86e-05				CC2D1A,CDH2,PIP5K1C,SH3GL2,SYN1	5
Cellular Assembly and Organization, Nervous System Development and Function, Tissue Morphology	Quantity of synaptic vesicles	5.33e-08	Increased	2		ERC2,MADD,NTRK3,PCLO,PTPRN2,RIMS1,SH3GL2,SYN1,UNC13A	9
Cellular Assembly and Organization, Nervous System Development and Function, Tissue Morphology	Quantity of dendritic spines	6.3e-06	Increased	2.236	bias	ARHGEF7,DLG4,GIT1,GRID2,GRIN1,MARK2,SRCIN1	7
Cellular Assembly and Organization, Nervous System Development and Function, Tissue Morphology	Abnormal quantity of synaptic vesicles	9.38e-05				ERC2,MADD,PCLO,SH3GL2,UNC13A	5
Cellular Compromise	Degeneration of cells	9.45e-06		-1.403	bias	ANK3,CACNA1D,CACNA2D2,CD9,DNAJC5,DNM1L,GABRB2,GPHN,GRIA2,GRID2,GRIN1,GRIN2B,HADHA,KCNJ6,KCNMA1,MARK2,NTRK3,PARK7,PLEC,STMN1,TMOD1	21
Cellular Compromise	Degradation of mitochondria	0.000237		1.288		AFDN,DNM1L,GFER,Mff,NPTX1,OPA1	6
Cellular Compromise, Neurological Disease, Organismal Injury and Abnormalities	Neurodegeneration of brain cells	0.000208		-0.708	bias	ANK3,CACNA2D2,DNM1L,GRIA2,GRID2,GRIN1,KCNJ6	7
Cellular Development, Cellular Growth and Proliferation, Nervous System Development and Function, Tissue Development	Development of neurons	1.29e-22	Increased	2.516	bias	ADGRL1,ANK3,ARHGEF7,ATL1,ATRN,BSN,CACNA2D2,CC2D1A,Cdc42,CDH2,CTNNB1,DAGLA,DBN1,DLG3,DLG4,DLGAP3,DNM1L,DPYSL5,ERC2,FOS,GABRB2,GABRG2,GIT1,GPHN,GRIA1,GRID2,GRIN1,GRIN3A,GSN,INHBA,KCNJ6,LHX1,LLGL1,LRRC4B,MAGI2,MARK2,MRAS,NCDN,NFKBIA,NLGN1,NLGN2,NPTXR,NTRK3,OPA1,PIP5K1C,PLPPR4,PPP1R9B,PPP2R2C,RIMS1,RTN3,RYR2,SH3GL2,SHANK1,SHANK2,SHANK3,SIPA1L1,SNCB,SNX1,SPTBN2,SRCIN1,STMN1,SYN1,SYNGAP1,TRIM9,TRPV1,TS…	69
Cellular Development, Cellular Growth and Proliferation, Nervous System Development and Function, Tissue Development	Proliferation of neuronal cells	1.38e-10		0.455		ADCY6,ALPP,ANK3,ARHGEF11,ARHGEF7,CD9,Cdc42,CDH2,CTNNB1,DAGLA,DLG4,DNM1L,DPYSL5,Exoc7,GPHN,KATNA1,MAOA,MARK2,MRAS,NCDN,NFKBIA,NINJ1,NLGN1,NPTX1,NTRK3,PLPPR4,PPP2R2C,PTP4A2,PTPRS,SLC25A5,SNPH,SNX1,SYN1,SYNGAP1,TRPV1,TSC1,VAMP7,ZFYVE27	38
Cellular Development, Cellular Growth and Proliferation, Nervous System Development and Function, Tissue Development	Growth of neurites	3.03e-10		0.407		ADCY6,ALPP,ARHGEF11,ARHGEF7,CD9,Cdc42,CDH2,DLG4,DNM1L,DPYSL5,Exoc7,GPHN,KATNA1,MAOA,MARK2,MRAS,NCDN,NFKBIA,NINJ1,NLGN1,NPTX1,NTRK3,PLPPR4,PPP2R2C,PTP4A2,PTPRS,SLC25A5,SNPH,SNX1,SYN1,SYNGAP1,TSC1,VAMP7,ZFYVE27	34
Cellular Development, Cellular Growth and Proliferation, Nervous System Development and Function, Tissue Development	Outgrowth of neurites	2.29e-07		0.952	bias	ADCY6,ARHGEF11,ARHGEF7,CD9,Cdc42,CDH2,DNM1L,DPYSL5,Exoc7,GPHN,KATNA1,MARK2,MRAS,NCDN,NINJ1,NLGN1,NPTX1,NTRK3,PPP2R2C,PTPRS,SLC25A5,SNX1,SYN1,SYNGAP1,VAMP7,ZFYVE27	26
Cellular Development, Cellular Growth and Proliferation, Nervous System Development and Function, Tissue Development	Growth of axons	1.79e-05		-1.778		ALPP,Cdc42,GPHN,KATNA1,MAOA,MARK2,PLPPR4,PTP4A2,PTPRS,SNPH,SYN1,TSC1,VAMP7	13
Cellular Function and Maintenance	Cellular homeostasis	1e-05		1.013		ADCY6,AFDN,ARHGEF11,ARHGEF7,ATP2A2,ATP6AP1,CACNA1D,CACNB3,CAMK2D,CD151,CLIC4,CNIH2,CRP,CTNNB1,CYCS,DCXR,DLG4,DLGAP1,DNM1L,ERC2,FKBP1B,FOS,GABRA1,GABRB2,GABRG2,GDF11,GFER,GIT1,Gk,GPD2,GRID2,GRIN1,GRIN2B,GSN,IMMT,INHBA,JAM3,KCNMA1,MARK2,Mff,NAMPT,NBN,NDRG1,NFKBIA,OPA1,PARK7,PHB2,PRDX1,PRKAA1,PTPN9,RIMS1,RPH3AL,RYR2,SLC27A1,STK39,STOML2,TMEM165,TMEM38A,TRPV1,TSC1,TUFM,USP19,VDAC1	63
Cellular Function and Maintenance, Molecular Transport	Exocytosis	7.17e-08		0.184	bias	ATP2A2,ATP6AP1,CACNA1D,Cdc42,DNAJC5,Exoc7,PCLO,PIP5K1C,RAB9A,RIMS1,SPTBN2,SRCIN1,STX6,SYNJ1,TRIM9,UNC13A,VAMP7	17
Cellular Function and Maintenance, Molecular Transport	Exocytosis by cells	5.14e-05		0.128	bias	ATP2A2,ATP6AP1,CACNA1D,Cdc42,Exoc7,PCLO,RAB9A,SRCIN1,UNC13A,VAMP7	10
Cellular Function and Maintenance, Nervous System Development and Function, Tissue Development	Function of neurons	1.31e-10	Increased	2		CACNA1D,CC2D1A,DLG4,GRID2,GRIN2B,KCNMA1,NLGN1,NLGN2,PPP1R9B,PTPRS,SHANK3,SNPH,STK39,TRIM9,TRPV1,UNC13A	16
Cellular Movement	Migration of cells	5.43e-06		1.374		ACSL4,AFDN,ALCAM,ALPP,AOC3,APOB,ARHGEF11,ARHGEF6,ARHGEF7,ATAT1,ATP2A2,ATRN,CACNA1D,CAMK2D,CD151,CD82,CD9,Cdc42,CDH2,CLIC4,COL3A1,CRP,CTBP1,CTNNB1,CUL5,DBN1,DLG4,DNAJB6,DNM1L,DUSP1,FOS,FZD4,GIT1,GRIA2,GSN,HACE1,HSPA1A/HSPA1B,INHBA,JAM3,KATNA1,KCNMA1,KLHL20,LHX1,LLGL1,MAGI2,MARK2,MIIP,MRAS,MYO1C,NAMPT,NDRG1,Nes,NFKBIA,NINJ1,NTRK3,PARK7,PER1,PHB2,PIP5K1C,PLEC,PPP1R9B,PRDX1,PRKAA1,PTP4A2,REN,SCG2,SHR…	75
Cellular Movement	Cell movement	5.83e-06		1.994		ACSL4,AFDN,ALCAM,ALPP,AOC3,APOB,ARHGEF11,ARHGEF6,ARHGEF7,ATAT1,ATP2A2,ATRN,CACNA1D,CAMK2D,CD151,CD82,CD9,Cdc42,CDH2,CLIC4,COL2A1,COL3A1,CRP,CTBP1,CTNNB1,CUL5,DBN1,DLG4,DNAJB6,DNM1L,DUSP1,FOS,FZD4,GIT1,GRIA2,GRID2,GSN,HACE1,HOMER3,HSPA1A/HSPA1B,INHBA,JAM3,KATNA1,KCNMA1,KLHL20,LHX1,LLGL1,MAGI2,MARK2,MIIP,MRAS,MYO1C,NAMPT,NCDN,NDRG1,Nes,NFKBIA,NINJ1,NPTX1,NTRK3,PARK7,PER1,PHB2,PIP5K1C,PLEC,PPP1R9B,P…	82
Cellular Movement	Invasion of cells	0.000373		1.919		ACSL4,AFDN,ALCAM,ANK3,ARHGEF11,ATP6AP1,CA3,CD151,CD82,CD9,Cdc42,CDH2,COL2A1,CTBP1,CTNNB1,DNAJB6,DNM1L,DUSP1,FOS,GIT1,GRID2,GSN,INHBA,JAM3,KCNMA1,MRAS,NAMPT,NDRG1,Nes,NFKBIA,NTRK3,PARK7,PRKAA1,PTP4A2,PTPN9,STMN1,UFL1,VAMP7	38
Connective Tissue Disorders, Developmental Disorder, Organismal Injury and Abnormalities, Skeletal and Muscular Disorders	Pectus excavatum	0.000204				GABRA1,GABRB2,GABRG2,GRIA1	4
Connective Tissue Disorders, Developmental Disorder, Organismal Injury and Abnormalities, Skeletal and Muscular Disorders	Scoliosis	0.000237				CACNA2D1,CACNA2D2,FKBP8,GABRA1,GABRB2,GRIN3A	6
Connective Tissue Disorders, Inflammatory Disease, Inflammatory Response, Organismal Injury and Abnormalities, Skeletal and Muscular Disorders	Cervical spondylosis	3.34e-05				CACNA2D1,CACNA2D2,CACNA2D3	3
Connective Tissue Disorders, Organismal Injury and Abnormalities, Skeletal and Muscular Disorders	Articular rigidity	0.000261				ADCY6,CACNA2D1,CACNA2D2,CACNA2D3,PIP5K1C,TNNI2	6
Connective Tissue Disorders, Organismal Injury and Abnormalities, Skeletal and Muscular Disorders, Tissue Morphology	Fracture of bone	4e-05				CTNNB1,GABRA1,GABRB2,GABRG2,GRIA1,GRIN1,GRIN2B,GRIN3A	8
Connective Tissue Disorders, Organismal Injury and Abnormalities, Tissue Morphology	Deterioration of connective tissue	0.000218		-1.067		COL2A1,CTNNB1,DUSP1,FOS,GABRA1,GABRB2,GABRG2,GRIA1,GRIN1,GRIN2B,GRIN3A,NAMPT	12
Dental Disease, Digestive System Development and Function, Embryonic Development, Gastrointestinal Disease, Organ Development, Organismal Development, Organismal Injury and Abnormalities	Dental caries	4.96e-06				GABRA1,GABRB2,GABRG2,GRIN1,GRIN2B,GRIN3A	6
Dermatological Diseases and Conditions, Neurological Disease, Organismal Injury and Abnormalities	Hyperalgesia	5.99e-11		0.282		ACPP,CA3,CACNA2D1,CACNA2D2,DNM1L,FOS,GABRA1,GABRB2,GABRG2,GRIA1,GRIA2,GRIN1,GRIN2B,GRIN3A,NPTX1,PIP5K1C,TRPV1	17
Dermatological Diseases and Conditions, Neurological Disease, Organismal Injury and Abnormalities	Hyperesthesia	2.44e-10		0.53		ACPP,CA3,CACNA2D1,CACNA2D2,DNM1L,FOS,GABRA1,GABRB2,GABRG2,GRIA1,GRIA2,GRIN1,GRIN2B,GRIN3A,NPTX1,PIP5K1C,RIMS1,TRPV1	18
Dermatological Diseases and Conditions, Neurological Disease, Organismal Injury and Abnormalities, Skeletal and Muscular Disorders	Hyperalgesia of paw	9.14e-08		1.109	bias	GRIN1,GRIN2B,GRIN3A,NPTX1,TRPV1	5
Dermatological Diseases and Conditions, Organismal Injury and Abnormalities, Renal and Urological Disease	Uremic pruritus	0.000181				CACNA2D1,CACNA2D2,CACNA2D3	3
Developmental Disorder	Autism or intellectual disability	1.61e-06				ACSL4,ANK3,ARHGEF6,ARHGEF7,CASK,CC2D1A,CTNNB1,DLG3,DLG4,GABRA1,GABRB2,GABRG2,GAD2,GRIN1,GRIN2B,GRIN3A,KCNJ6,KCNQ2,MAOA,OPA1,RAB3GAP2,ROGDI,SHANK2,SHANK3,SYNGAP1	25
Developmental Disorder	Growth Failure	0.000242	Decreased	-4.06	bias	CACNA2D2,CDH2,COPS8,CYCS,DNAJC5,Gk,GORASP2,GPD2,GRIA2,HADHA,IP6K1,MAGI2,MARK2,NBN,NFKBIA,NINJ1,PTPMT1,PTPN9,PTPRS,RBP1,RYR2,SH3GL2,SNX1,SYNGAP1,SYNJ1,TSC1,VDAC1	27
Developmental Disorder, Endocrine System Disorders, Organismal Injury and Abnormalities, Reproductive System Disease	Cryptorchidism	0.00041				DNAJC5,GABRA1,GABRB2,GABRG2,GRIA1	5
Developmental Disorder, Hereditary Disorder, Metabolic Disease, Organismal Injury and Abnormalities, Renal and Urological Disease	3-methylcrotonylglycinuria	0.000227				MCCC1,MCCC2	2
Developmental Disorder, Hereditary Disorder, Neurological Disease, Organismal Injury and Abnormalities	Ohtahara syndrome	9.53e-07				ARHGEF9,CACNA2D2,FRRS1L,GABRA1,GABRG2,GRIN2B,KCNQ2,KCNT2,SPTAN1,SYNJ1	10
Developmental Disorder, Hereditary Disorder, Neurological Disease, Organismal Injury and Abnormalities	Autosomal dominant early infantile epileptic encephalopathy	0.000428				GABRA1,GRIN2B,KCNQ2,SPTAN1	4
Developmental Disorder, Neurological Disease	Mental retardation	1.26e-05				ACSL4,ANK3,ARHGEF6,ARHGEF7,CASK,CC2D1A,CTNNB1,DLG3,DLG4,GABRA1,GABRB2,GABRG2,GRIN1,GRIN2B,KCNJ6,KCNQ2,MAOA,OPA1,RAB3GAP2,ROGDI,SHANK2,SYNGAP1	22
Developmental Disorder, Neurological Disease, Organismal Injury and Abnormalities	Developmental epilepsy	3.14e-10				ARHGEF9,CA3,CACNA2D2,FRRS1L,GABRA1,GABRB2,GABRG2,GRIA1,GRIN1,GRIN2B,GRIN3A,KCNQ2,KCNT2,SPTAN1,SYNJ1	15
Developmental Disorder, Neurological Disease, Organismal Injury and Abnormalities	Lennox-Gastaut syndrome	1.88e-06				CA3,GABRA1,GABRB2,GABRG2,GRIA1,GRIN1,GRIN2B,GRIN3A	8
Developmental Disorder, Neurological Disease, Psychological Disorders	Autism	6.73e-07				ANK3,GABRA1,GABRB2,GABRG2,GAD2,GRIN1,GRIN2B,GRIN3A,MAOA,SHANK2,SHANK3	11
Developmental Disorder, Neurological Disease, Psychological Disorders	Speech and language disorders	0.000281				CA3,GABRA1,GABRB2,GABRG2,GRIN1,GRIN2B,GRIN3A	7
Digestive System Development and Function, Embryonic Development, Organ Development, Organismal Development	Tooth development	0.000142				CTNNB1,GABRA1,GABRB2,GABRG2,GRIN1,GRIN2B,GRIN3A,INHBA,NFKBIA,ROGDI	10
Drug Metabolism, Endocrine System Development and Function, Lipid Metabolism, Molecular Transport, Small Molecule Biochemistry	Secretion of progesterone	0.000301				CTNNB1,FZD4,INHBA,PRKAA1	4
Embryonic Development, Organismal Development	Development of head	4.48e-05		0.605	bias	AFDN,ANK3,APOB,ARHGEF11,ATAT1,ATRN,CDH2,CLIC4,COL2A1,COL3A1,CRELD1,CTNNB1,DLG4,DNAJC5,ERC2,FKBP8,FOS,FZD4,GABRA1,GABRB2,GABRG2,GDF11,GPHN,GRIN1,GRIN2B,GRIN3A,INHBA,JAM3,LHX1,LLGL1,MAOA,MPP4,NBN,NFKBIA,PLPPR4,PTPRS,RBP1,ROGDI,SHANK3,SHROOM2,SNCB,TRPV1,TSC1	43
Endocrine System Disorders, Gastrointestinal Disease, Metabolic Disease, Neurological Disease, Organismal Injury and Abnormalities	Diabetic peripheral neuropathy	9.99e-06				CACNA2D1,CACNA2D2,CACNA2D3,TRPV1	4
Endocrine System Disorders, Gastrointestinal Disease, Metabolic Disease, Neurological Disease, Organismal Injury and Abnormalities	Diabetic neuropathy	1.62e-05				CACNA2D1,CACNA2D2,CACNA2D3,GRIN1,GRIN2B,GRIN3A,TRPV1	7
Endocrine System Disorders, Gastrointestinal Disease, Metabolic Disease, Organismal Injury and Abnormalities	Diabetic complication	9.77e-05				CA3,CACNA1D,CACNA2D1,CACNA2D2,CACNA2D3,COL2A1,COL3A1,CRP,CTNNB1,GRIN1,GRIN2B,GRIN3A,MAGI2,REN,TRPV1	15
Endocrine System Disorders, Hematological Disease, Metabolic Disease	Hypoglycemia	0.000332		-1.309	bias	CACNA1D,CACNB3,FAH,Gk,GPD1,GPD2,HADHA,MARK2,MARK3	9
Energy Production, Molecular Transport, Nucleic Acid Metabolism, Small Molecule Biochemistry	Concentration of ATP	2.47e-05		1.736		DNM1L,GPD2,HMOX2,MAOA,MARK2,MICU1,NAMPT,PRKAA1,PTPMT1,STOML2,VDAC1	11
Free Radical Scavenging	Metabolism of reactive oxygen species	0.000149		1.467		CANX,CRP,CYCS,DNM1L,DUSP1,FNTB,FOS,GRIN1,GSN,GSTP1,HK1,IMMT,MAOA,NAMPT,NFKBIA,PARK7,PRDX1,PRKAA1,REN,SH3GL2,SHANK2,TSC1,UQCRC2,VDAC1	24
Free Radical Scavenging	Synthesis of reactive oxygen species	0.000217		1.421		CANX,CRP,DNM1L,DUSP1,FNTB,FOS,GRIN1,GSN,GSTP1,HK1,IMMT,MAOA,NAMPT,NFKBIA,PARK7,PRDX1,PRKAA1,REN,SH3GL2,SHANK2,TSC1,UQCRC2,VDAC1	23
Gastrointestinal Disease	Postoperative nausea and vomiting	1.88e-06				CACNA2D1,CACNA2D2,GABRA1,GABRB2,GABRG2,GRIN1,GRIN2B,GRIN3A	8
Gastrointestinal Disease	Vomiting	2.89e-05				CA3,CACNA2D1,CACNA2D2,GABRA1,GABRB2,GABRG2,GRIA1,GRIN1,GRIN2B,GRIN3A	10
Gastrointestinal Disease	Nausea	6.33e-05				CACNA2D1,CACNA2D2,GABRA1,GABRB2,GABRG2,GRIA1,GRIN1,GRIN2B,GRIN3A	9
Hereditary Disorder, Neurological Disease, Organismal Injury and Abnormalities	Familial epilepsy	1.1e-06				ARHGEF9,FRRS1L,GABRA1,GABRG2,GRIN2B,KCNMA1,KCNQ2,KCNQ3,ROGDI,SPTAN1,SYN1,SYNJ1	12
Hereditary Disorder, Neurological Disease, Organismal Injury and Abnormalities	Autosomal dominant epilepsy	1.83e-05				GABRA1,GABRG2,GRIN2B,KCNMA1,KCNQ2,KCNQ3,SPTAN1	7
Hereditary Disorder, Neurological Disease, Organismal Injury and Abnormalities	Benign rolandic epilepsy	0.000223				CA3,GABRA1,GABRB2,GABRG2,KCNQ2	5
Hereditary Disorder, Neurological Disease, Organismal Injury and Abnormalities	Benign familial neonatal seizures 2	0.000227				KCNQ2,KCNQ3	2
Hereditary Disorder, Neurological Disease, Organismal Injury and Abnormalities	Hereditary neuropathy	0.000276				ABHD12,ATL1,GSN,HACE1,HK1,KCNMA1,MT-ND3,NDRG1,OPA1,PARK7,SNCB,SYNJ1,TMEM126A,ZFYVE27	14
Hereditary Disorder, Neurological Disease, Organismal Injury and Abnormalities	Autosomal dominant encephalopathy	0.000287				ATL1,GABRA1,GABRG2,GRIN2B,KCNMA1,KCNQ2,KCNQ3,SNCB,SPTAN1,SPTBN2,TSC1,ZFYVE27	12
Hereditary Disorder, Neurological Disease, Organismal Injury and Abnormalities, Psychological Disorders	Familial pervasive developmental disorder	9.22e-07				ANK3,GRIN2B,MAOA,NLGN1,SHANK2,SHANK3	6
Hereditary Disorder, Neurological Disease, Organismal Injury and Abnormalities, Psychological Disorders, Skeletal and Muscular Disorders	Huntington's Disease	7.38e-10				ALDH6A1,ARHGEF7,ATP2A2,ATP5F1C,CACNA2D3,CACNB3,Cdc42,CDH2,CRP,CTNNB1,CYCS,DGKB,ENO3,FOS,GABRA1,GABRB2,GABRG2,GAD2,GHITM,GIT1,GPD1,GRIN1,GRIN2B,GRIN3A,HOMER1,HSPA1A/HSPA1B,KCNQ2,NDRG1,NDUFS2,PFKFB1,PGRMC1,PSME1,SCG2,SLC27A1,SYNJ1,TGM1,TNNI2	37
Hereditary Disorder, Organismal Injury and Abnormalities, Skeletal and Muscular Disorders	Hereditary myopathy	0.000296				ADCY6,ATL1,CACNA2D1,CANX,COL3A1,CYCS,DNAJB6,GFER,HACE1,HK1,HOMER1,KCNQ2,MICU1,MT-ND3,NDRG1,NDUFA10,NDUFA9,OPA1,PGRMC1,PIP5K1C,PLEC,RYR2,TMOD1,ZFYVE27	24
Infectious Diseases, Respiratory Disease	Infection of respiratory tract	3.57e-05				CD9,CRP,GABRA1,GABRB2,GABRG2,GRIN1,GRIN2B,GRIN3A,NFKBIA,PER1,TALDO1,TUBB4B	12
Inflammatory Disease, Organismal Injury and Abnormalities, Respiratory Disease	Status asthmaticus	0.000379				GRIN1,GRIN2B,GRIN3A	3
Lipid Metabolism, Molecular Transport, Small Molecule Biochemistry	Concentration of lipid	1.28e-05		-0.007		ABHD12,ACPP,ACSL4,APOB,ATP2A2,CRP,CTNNB1,DAGLA,DLG4,DUSP1,FOS,GAD2,GFER,Gk,GPD2,GRM7,HADHA,INHBA,KCNA6,KCNMA1,MARK2,MRAS,NAMPT,NCEH1,PFKFB1,PIP5K1C,PRKAA1,PTPMT1,PTPRN2,RAB9A,RBP1,REN,SLC27A1,STK39,STOML2,SYNJ1,TMEM35A,TSC1	38
Lipid Metabolism, Small Molecule Biochemistry	Phosphorylation of lipid	0.000223				DGKB,DGKG,IP6K1,PIP5K1C,SYNJ1	5
Metabolic Disease	Amyloidosis	1.01e-05				ADGRL1,ATP5PB,CANX,CRP,DLGAP2,DNM1L,GABRA1,GABRB2,GABRG2,GAD2,GRIA2,GRIN1,GRIN2B,GRIN3A,GSN,HOMER1,HSPA1A/HSPA1B,MAOA,Nes,NPTX1,NTRK3,OPA1,PLPPR4,PRDX1,RIMS1,RTN3,RYR2,SH3GL2,SYNJ1,TGM1,VDAC1	31
Metabolic Disease	Glucose metabolism disorder	2.83e-05	Decreased	-2.239		ACSL4,AOC3,APOB,ARHGEF6,ATAT1,ATP2A2,CA3,CACNA1D,CACNA2D1,CACNA2D2,CACNA2D3,CACNB3,CANX,COL2A1,COL3A1,CRP,CTNNB1,DGKB,DLGAP2,DUSP1,Exoc7,FAH,FKBP1B,FOS,GABRA1,GABRB2,GABRG2,GAD2,GDF11,Gk,GPD1,GPD2,GRIN1,GRIN2B,GRIN3A,GSTP1,GUCY1A2,HADHA,HSPA1A/HSPA1B,IMMT,KCNJ6,MAGI2,MAOA,MARK2,MARK3,NFKBIA,OPA1,RBP1,REN,RYR2,SLC27A1,TRPV1,VKORC1	53
Metabolic Disease	Enzymopathy	0.000128				CASK,DNAJC5,FAH,GPHN,HK1,IVD,MAOA,MCCC1,MCCC2,MT-ND3,NDUFA10,NDUFA9,NDUFS2,QDPR,TALDO1,UQCRC2	16
Metabolic Disease	Mitochondrial disorder	0.000214				DNM1L,ELAC2,GFER,GFM2,MT-ND3,NDUFA10,NDUFA9,NDUFS2,OPA1,TUFM,UQCRC2	11
Metabolic Disease, Neurological Disease, Organismal Injury and Abnormalities, Psychological Disorders	Alzheimer disease	9.19e-06				ADGRL1,ATP5PB,CANX,CRP,DLGAP2,DNM1L,GABRA1,GABRB2,GABRG2,GAD2,GRIA2,GRIN1,GRIN2B,GRIN3A,HOMER1,HSPA1A/HSPA1B,MAOA,Nes,NPTX1,NTRK3,OPA1,PLPPR4,PRDX1,RIMS1,RTN3,RYR2,SH3GL2,SYNJ1,TGM1,VDAC1	30
Metabolic Disease, Organismal Injury and Abnormalities, Renal and Urological Disease	Albuminuria	0.000208		1.117		CACNA1D,CACNA2D1,CD151,CRP,CTNNB1,MAGI2,REN	7
Molecular Transport	Transport of molecule	8.25e-17		1.661	bias	ACSL4,ANK3,ANKH,AOC3,APOB,ARHGEF11,ARL6IP5,ATP2A2,ATP6AP1,CACNA1D,CACNA2D1,CACNA2D2,CACNA2D3,CACNB3,CAMK2D,CANX,Cdc42,CLIC4,CTNNB1,DNM1L,FZD4,GABRA1,GABRG2,Gk,GOLPH3L,GPRASP1,GRIA1,GRIA2,GRID2,GRIN1,GRIN2B,GRIN3A,GRM7,GSN,HK1,HMOX2,INHBA,KCNA6,KCNJ6,KCNMA1,Kcnn2,KCNQ3,KLHL20,LLGL1,MICU1,MYO1C,NCEH1,NFKBIA,PAM,PCYOX1,PER1,PHB2,PRKAA1,PTPRN2,RAB3GAP2,RBP1,RIMS1,RPH3AL,RYR2,SCFD1,SCG2,SFXN1,SFXN5,SL…	88
Molecular Transport	Transport of ion	8.27e-12		1.131	bias	ANK3,ANKH,ATP2A2,ATP6AP1,CACNA1D,CACNA2D1,CACNA2D2,CACNA2D3,CACNB3,CAMK2D,CLIC4,GABRA1,GABRG2,GRIA1,GRIN1,GRIN2B,GRIN3A,KCNA6,KCNJ6,KCNMA1,Kcnn2,KCNQ3,MICU1,PCYOX1,PER1,RYR2,SFXN1,SNX1,STEAP3,STK39,STOML2,TMEM165,TRPV1,TSC1,VDAC1,VDAC2	36
Molecular Transport	Transport of metal ion	5.98e-11		1.067	bias	ANK3,ATP2A2,CACNA1D,CACNA2D1,CACNA2D2,CACNA2D3,CACNB3,CAMK2D,GRIN1,GRIN2B,GRIN3A,KCNA6,KCNJ6,KCNMA1,Kcnn2,MICU1,PER1,RYR2,SFXN1,SNX1,STEAP3,STK39,STOML2,TMEM165,TRPV1,TSC1,VDAC1	27
Molecular Transport	Transport of inorganic cation	1.33e-10		1.067	bias	ANK3,ATP2A2,ATP6AP1,CACNA1D,CACNA2D1,CACNA2D2,CACNA2D3,CACNB3,CAMK2D,GRIN1,GRIN2B,GRIN3A,KCNA6,KCNJ6,KCNMA1,Kcnn2,MICU1,PER1,RYR2,SFXN1,SNX1,STEAP3,STK39,STOML2,TMEM165,TRPV1,TSC1,VDAC1	28
Molecular Transport	Transport of metal	1.39e-09		0.555		ANK3,ATP2A2,ATP6AP1,CACNA1D,CACNA2D1,CACNA2D2,CACNA2D3,CACNB3,CAMK2D,GRIN1,GRIN2B,GRIN3A,HMOX2,KCNA6,KCNJ6,KCNMA1,Kcnn2,MICU1,PER1,RYR2,SFXN1,SNX1,STEAP3,STK39,STOML2,TMEM165,TRPV1,TSC1,VDAC1	29
Molecular Transport	Transport of divalent cations	3.4e-09				ATP2A2,CACNA1D,CACNA2D1,CACNA2D2,CACNA2D3,CACNB3,CAMK2D,GRIN1,GRIN2B,GRIN3A,MICU1,RYR2,STEAP3,STOML2,TMEM165,TRPV1,VDAC1	17
Molecular Transport	Secretion of molecule	7e-07		0.708		ACSL4,APOB,CANX,Cdc42,CTNNB1,DNM1L,FZD4,Gk,GOLPH3L,GRID2,GRIN2B,GRM7,GSN,INHBA,MYO1C,PAM,PER1,PRKAA1,PTPRN2,RBP1,RIMS1,RPH3AL,SCG2,SLC27A1,SRCIN1,STEAP3,SYN1,TMEM184A,TRPV1,UNC13A,USP19	31
Molecular Transport	Transmembrane transport of ion	0.000237				ATP6AP1,GABRA1,GRIA1,KCNQ3,RYR2,TRPV1	6
Molecular Transport, Protein Trafficking	Secretion of protein	0.000195		-0.447		APOB,CANX,DNM1L,GOLPH3L,MYO1C,PAM,RPH3AL,SCG2,SRCIN1,STEAP3,USP19	11
Nervous System Development and Function	Morphology of nervous system	1.39e-23				AFDN,ANK3,APOB,ARHGEF7,ARHGEF9,ATAT1,ATRN,CACNA1D,CACNA2D2,CACNA2D3,CACNB3,CANX,CC2D1A,CD9,Cdc42,CDH2,CLIC4,COL2A1,CTNNB1,DAGLA,DBN1,DLG3,DLG4,DLGAP3,DNAJC5,DPYSL5,DUSP1,ERC2,FKBP8,FOS,GABRA1,GCLM,GDF11,GIT1,GPHN,GRIA1,GRIA2,GRID2,GRIN1,GRIN2B,GRIN3A,JAM3,KATNA1,LHX1,LLGL1,MADD,MAGI2,MAOA,MARK2,NAMPT,Nes,NFKBIA,NPTX1,NTRK3,PARK7,PHB2,PLEC,PPP1R9B,PRKAA1,PTPN9,PTPRS,RBP1,RIMS1,SH3GL2,SHANK1,SHANK2…	78
Nervous System Development and Function	Coordination	9.58e-10	Increased	2.364	bias	ABHD12,ARL6IP5,CACNA2D2,DLG4,DNAJC5,GABRA1,GRIA1,GRIA2,GRID2,GRIN2B,KCNMA1,NAMPT,Nes,NTRK3,PARK7,SH3GL2,SHANK1,SHANK2,SHANK3,SNPH,TRPV1	21
Nervous System Development and Function	Morphology of central nervous system	7.75e-09				ANK3,ATAT1,ATRN,CACNA2D2,CACNB3,COL2A1,CTNNB1,DBN1,DLG3,DLGAP3,FKBP8,GCLM,GDF11,GRIA1,GRIA2,GRID2,GRIN1,GRIN2B,LHX1,LLGL1,MAOA,NTRK3,PARK7,PPP1R9B,PTPN9,PTPRS,RIMS1,SHANK1,SHANK2,SHANK3,SNCB,SPTBN2,STMN1,SYN1,SYNGAP1,TSC1,VAMP7	37
Nervous System Development and Function	Reflex	9.85e-08		1.066	bias	ATP2A2,DNAJC5,FOS,GABRA1,GABRB2,GABRG2,GRIA1,GRIA2,GRID2,KCNMA1,SHANK1,SHANK2,TRPV1	13
Nervous System Development and Function	Prepulse inhibition	1.6e-07		1.51	bias	DBN1,DLG4,GAD2,GRID2,GRIN1,GRIN2B,GRIN3A,HOMER1,KCNQ2,RIMS1,SYNGAP1	11
Nervous System Development and Function	Righting reflex	4.24e-07		1.664	bias	ATP2A2,DNAJC5,GABRA1,GABRB2,GABRG2,GRID2,SHANK1,SHANK2,TRPV1	9
Nervous System Development and Function	Sensation	1.69e-06		1.472		ABHD12,ACPP,CACNA1D,CACNA2D1,CACNA2D3,CACNB3,COL2A1,DNAJC5,FOS,FZD4,GABRB2,GRIN1,GRIN2B,GRM7,JAM3,KCNA6,KCNMA1,KCNT2,NLGN2,PRKAA1,TRPV1	21
Nervous System Development and Function, Neurological Disease	Abnormal morphology of nervous system	3.27e-15				AFDN,ANK3,APOB,ARHGEF9,CACNA1D,CACNA2D2,CACNB3,CANX,CC2D1A,COL2A1,DAGLA,DBN1,DLG3,DLG4,DLGAP3,DNAJC5,DUSP1,ERC2,FKBP8,GABRA1,GCLM,GDF11,GIT1,GPHN,GRIA1,GRIA2,GRID2,GRIN1,GRIN2B,GRIN3A,LHX1,LLGL1,MADD,MAGI2,MARK2,Nes,NPTX1,NTRK3,PARK7,PHB2,PLEC,PPP1R9B,PRKAA1,PTPN9,PTPRS,RBP1,RIMS1,SH3GL2,SHANK1,SHANK2,SHANK3,SNCB,SNPH,SRCIN1,STMN1,SYN1,SYNGAP1,UNC13A	58
Nervous System Development and Function, Neurological Disease	Abnormal morphology of central nervous system	9.09e-07				ANK3,CACNA2D2,CACNB3,COL2A1,DBN1,DLG3,DLGAP3,FKBP8,GCLM,GDF11,GRIA1,GRIA2,GRID2,GRIN1,GRIN2B,LHX1,LLGL1,PARK7,PPP1R9B,PTPN9,PTPRS,RIMS1,SHANK1,SHANK2,SHANK3,SNCB,STMN1,SYN1,SYNGAP1	29
Nervous System Development and Function, Neurological Disease, Organ Morphology, Organismal Development, Organismal Injury and Abnormalities	Abnormal morphology of brain	1.21e-06				ANK3,CACNA2D2,CACNB3,COL2A1,DBN1,DLG3,DLGAP3,FKBP8,GCLM,GRIA2,GRID2,GRIN1,GRIN2B,LHX1,LLGL1,PARK7,PPP1R9B,PTPN9,PTPRS,RIMS1,SHANK1,SHANK2,SHANK3,SNCB,STMN1,SYN1,SYNGAP1	27
Nervous System Development and Function, Neurological Disease, Organ Morphology, Organismal Development, Organismal Injury and Abnormalities	Abnormal morphology of spinal cord	9.17e-05				FKBP8,GDF11,GRIA1,GRIA2,LHX1,RIMS1	6
Nervous System Development and Function, Neurological Disease, Organ Morphology, Organismal Development, Organismal Injury and Abnormalities	Abnormal morphology of cerebrum	0.000287				DBN1,DLG3,FKBP8,GRIA2,GRIN2B,LLGL1,PPP1R9B,RIMS1,SHANK1,SHANK3,SYN1,SYNGAP1	12
Nervous System Development and Function, Organ Morphology, Organismal Development	Morphology of brain	7.13e-08				ANK3,ATAT1,CACNA2D2,CACNB3,COL2A1,CTNNB1,DBN1,DLG3,DLGAP3,FKBP8,GCLM,GRIA2,GRID2,GRIN1,GRIN2B,LHX1,LLGL1,MAOA,PARK7,PPP1R9B,PTPN9,PTPRS,RIMS1,SHANK1,SHANK2,SHANK3,SNCB,SPTBN2,STMN1,SYN1,SYNGAP1,TSC1,VAMP7	33
Nervous System Development and Function, Organ Morphology, Organismal Development	Morphology of cerebral cortex	3.41e-05				ATAT1,CTNNB1,DBN1,DLG3,GRIA2,GRIN2B,LLGL1,MAOA,PPP1R9B,RIMS1,SHANK1,SHANK3,SYN1,SYNGAP1,TSC1	15
Nervous System Development and Function, Organ Morphology, Organismal Development	Morphology of spinal cord	0.000107				FKBP8,GDF11,GRIA1,GRIA2,LHX1,NTRK3,RIMS1	7
Nervous System Development and Function, Organ Morphology, Tissue Morphology	Quantity of brain cells	4.1e-08		-1.145		ANK3,CACNA2D2,CAMK2D,CTNNB1,DLG4,GABRA1,GDF11,LHX1,LLGL1,NBN,Nes,NTRK3,RIMS1,SPTBN2	14
Nervous System Development and Function, Organ Morphology, Tissue Morphology	Quantity of Purkinje cells	0.000196		-1.172	bias	ANK3,CACNA2D2,GABRA1,LHX1,SPTBN2	5
Nervous System Development and Function, Tissue Morphology	Morphology of nervous tissue	8.05e-20				ARHGEF7,ARHGEF9,ATAT1,CACNA1D,CACNA2D2,CACNA2D3,CC2D1A,CD9,Cdc42,CDH2,DBN1,DLG3,DLG4,DNAJC5,DPYSL5,DUSP1,ERC2,FOS,GABRA1,GDF11,GIT1,GPHN,GRIA1,GRID2,GRIN1,GRIN3A,JAM3,KATNA1,MADD,MAGI2,MARK2,NAMPT,Nes,NFKBIA,NPTX1,NTRK3,PARK7,PHB2,PLEC,PPP1R9B,PRKAA1,PTPN9,PTPRS,RIMS1,SH3GL2,SHANK1,SHANK2,SHANK3,SIPA1L1,SNCB,SNPH,SRCIN1,SYN1,SYNGAP1,TSC1,UNC13A	56
Nervous System Development and Function, Tissue Morphology	Quantity of neurons	2.23e-17		1.033		ANK3,ARHGEF7,BSN,CACNA1D,CACNA2D2,CAMK2D,CANX,DLG4,DLGAP3,DNM1L,DUSP1,ERC2,FOS,GABRA1,GABRG2,GDF11,GIT1,GPHN,GRID2,GRIN1,GRIN2B,INHBA,LHX1,LLGL1,MADD,MAOA,MARK2,NBN,NLGN1,NPTX1,NTRK3,PCLO,PTPRN2,PTPRS,RIMS1,SH3GL2,SNCB,SPTBN2,SRCIN1,SYN1,TSC1,UNC13A	42
Nervous System Development and Function, Tissue Morphology	Quantity of central nervous system cells	1.14e-07		-1.362		ANK3,CACNA2D2,CAMK2D,CTNNB1,DLG4,GABRA1,GDF11,LHX1,LLGL1,NBN,Nes,NTRK3,RIMS1,SPTBN2,TSC1	15
Neurological Disease	Motor dysfunction or movement disorder	1.4e-17	Decreased	-2.213	bias	ABHD12,ALDH6A1,ANK3,ANKH,ARHGEF7,ARHGEF9,ARL6IP5,ATL1,ATP2A2,ATP5F1C,CA3,CACNA1D,CACNA2D1,CACNA2D2,CACNA2D3,CACNB3,CANX,Cdc42,CDH2,CRP,CTNNB1,CYCS,DGKB,DNAJB6,DNAJC5,ENO3,FOS,FZD4,GABRA1,GABRB2,GABRG2,GAD2,GHITM,GIT1,GPD1,GPHN,GRIA1,GRIA2,GRID2,GRIN1,GRIN2B,GRIN3A,GSTP1,HMOX2,HOMER1,HSPA1A/HSPA1B,KCNMA1,KCNQ2,MAOA,MT-ND3,NBN,NDRG1,NDUFS2,NINJ1,NTRK3,OPA1,PARK7,PFKFB1,PGRMC1,PSME1,PTPN9,SCG2,SH3GL…	74
Neurological Disease	Movement Disorders	2.18e-17	Decreased	-2.015	bias	ABHD12,ALDH6A1,ANK3,ANKH,ARHGEF7,ARHGEF9,ARL6IP5,ATL1,ATP2A2,ATP5F1C,CA3,CACNA1D,CACNA2D1,CACNA2D2,CACNA2D3,CACNB3,CANX,Cdc42,CDH2,CRP,CTNNB1,CYCS,DGKB,DNAJB6,DNAJC5,ENO3,FOS,FZD4,GABRA1,GABRB2,GABRG2,GAD2,GHITM,GIT1,GPD1,GPHN,GRIA1,GRIA2,GRID2,GRIN1,GRIN2B,GRIN3A,GSTP1,HMOX2,HOMER1,HSPA1A/HSPA1B,KCNMA1,KCNQ2,MAOA,MT-ND3,NBN,NDRG1,NDUFS2,NINJ1,NTRK3,OPA1,PARK7,PFKFB1,PGRMC1,PSME1,PTPN9,SCG2,SH3GL…	73
Neurological Disease	Neurological signs	4.58e-10				ALDH6A1,ARHGEF7,ATP2A2,ATP5F1C,CACNA1D,CACNA2D3,CACNB3,Cdc42,CDH2,CRP,CTNNB1,CYCS,DGKB,ENO3,FKBP1B,FOS,GABRA1,GABRB2,GABRG2,GAD2,GHITM,GIT1,GPD1,GRIA2,GRIN1,GRIN2B,GRIN3A,HOMER1,HSPA1A/HSPA1B,KCNMA1,KCNQ2,NDRG1,NDUFS2,NTRK3,PFKFB1,PGRMC1,PSME1,SCG2,SLC27A1,SYNJ1,TGM1,TNNI2	42
Neurological Disease	Dyskinesia	6.9e-10				ALDH6A1,ARHGEF7,ATP2A2,ATP5F1C,CACNA2D3,CACNB3,Cdc42,CDH2,CRP,CTNNB1,CYCS,DGKB,ENO3,FOS,GABRA1,GABRB2,GABRG2,GAD2,GHITM,GIT1,GPD1,GRIA2,GRIN1,GRIN2B,GRIN3A,HOMER1,HSPA1A/HSPA1B,KCNMA1,KCNQ2,NDRG1,NDUFS2,PFKFB1,PGRMC1,PSME1,SCG2,SLC27A1,SYNJ1,TGM1,TNNI2	39
Neurological Disease	Early-onset neurological disorder	5.18e-08				ANK3,ARHGEF9,CACNA1D,CACNA2D2,FRRS1L,GABRA1,GABRB2,GABRG2,GRIN2B,KCNQ2,KCNQ3,KCNT2,OPA1,PARK7,RYR2,SPTAN1,SYNJ1	17
Neurological Disease	Cognitive impairment	6.12e-08		-1		ACSL4,ANK3,APOB,ARHGEF6,ARHGEF7,CA3,CASK,CC2D1A,CTNNB1,DLG3,DLG4,FKBP1B,GABRA1,GABRB2,GABRG2,GRIA1,GRIN1,GRIN2B,GRIN3A,HOMER1,KCNJ6,KCNQ2,MAOA,OPA1,RAB3GAP2,ROGDI,RYR2,SHANK2,SHANK3,SYNGAP1,SYNJ1	31
Neurological Disease	Essential tremor	1.26e-07				CA3,CACNA2D1,CACNA2D2,CACNA2D3,GABRA1,GRIN1,GRIN2B,GRIN3A	8
Neurological Disease	Unconsciousness	1.52e-07				GABRA1,GABRB2,GABRG2,GRIA1,GRIN1,GRIN2B,GRIN3A	7
Neurological Disease	Tremor	4.34e-07		-1.394	bias	ANK3,CA3,CACNA2D1,CACNA2D2,CACNA2D3,GABRA1,GRIA2,GRIN1,GRIN2B,GRIN3A,HSPA1A/HSPA1B,KCNMA1,PTPN9,SYNGAP1	14
Neurological Disease	Degeneration of nervous system	2.03e-06		-0.918	bias	ANK3,CACNA1D,CACNA2D2,DNAJC5,DNM1L,FZD4,GABRB2,GPHN,GRIA2,GRID2,GRIN1,GRIN2B,KCNJ6,KCNMA1,MARK2,NDRG1,NTRK3,PARK7,SH3GL2,STMN1	20
Neurological Disease	Neurodegeneration	2.2e-06		-1.125	bias	ANK3,CACNA1D,CACNA2D2,DNAJC5,DNM1L,FZD4,GABRB2,GPHN,GRIA2,GRID2,GRIN1,GRIN2B,KCNJ6,KCNMA1,MARK2,NDRG1,NTRK3,PARK7,SH3GL2,SNCB,STMN1	21
Neurological Disease	Touch abnormality	4.96e-06				CACNA2D3,GRIA1,GRIA2,HMOX2,HOMER3,TRPV1	6
Neurological Disease	Polyneuropathy	5.08e-06				ABHD12,ATL1,CACNA2D1,CACNA2D2,CACNA2D3,GSN,HACE1,HK1,KCNMA1,NDRG1,OPA1,TRPV1,ZFYVE27	13
Neurological Disease	Peripheral neuropathy	9.35e-06				ATL1,CACNA2D1,CACNA2D2,CACNA2D3,GRIN1,GRIN2B,GRIN3A,HACE1,HK1,KCNMA1,NDRG1,OPA1,SPTAN1,TRPV1,ZFYVE27	15
Neurological Disease	Progressive neurological disorder	1.68e-05				ALCAM,ANK3,ARL6IP5,CACNA1D,COL3A1,DNAJB6,ENO3,GABRA1,GABRB2,GABRG2,GAD2,GRIA1,GRIA2,GRIN1,GRIN2B,GRIN3A,GSN,GSTP1,HMOX2,KCNA6,KCNMA1,MIIP,PARK7,SH3GL2,SNCB,STMN1,SYN1,SYNJ1,TGM1,TUBB4B,UQCRC2	31
Neurological Disease	Convulsion	1.78e-05				GABRA1,GABRB2,GABRG2,GRM7,KCNQ2,KCNQ3	6
Neurological Disease	Ataxia	2.2e-05		-1.893	bias	ABHD12,ANK3,CACNA2D2,CANX,DNAJC5,FZD4,GABRA1,GRID2,GRIN1,GRIN3A,KCNMA1,NBN,NINJ1,OPA1,PARK7,SPTBN2,SYNJ1	17
Neurological Disease	Damage of nervous system	0.000105		0.038		CA3,FAH,GABRA1,GABRB2,GABRG2,GRIN1,GRIN2B,GRIN3A,GSN,KCNQ2,NFKBIA,PARK7,RASGRF2,SNPH,TRPV1	15
Neurological Disease	Progressive motor neuropathy	0.000109				ALCAM,ARL6IP5,CACNA1D,COL3A1,DNAJB6,ENO3,GABRA1,GABRB2,GABRG2,GAD2,GRIA1,GRIN1,GRIN2B,GRIN3A,GSN,GSTP1,HMOX2,KCNA6,KCNMA1,PARK7,SH3GL2,SNCB,STMN1,SYN1,SYNJ1,UQCRC2	26
Neurological Disease	Damage of central nervous system	0.000204		0.333		CA3,GABRA1,GABRB2,GABRG2,GRIN1,GRIN2B,GRIN3A,GSN,KCNQ2,NFKBIA,PARK7,RASGRF2,SNPH	13
Neurological Disease, Organismal Injury and Abnormalities	Seizure disorder	4.6e-16	Decreased	-2.659	bias	ANK3,ARHGEF7,ARHGEF9,BSN,CA3,CACNA1D,CACNA2D1,CACNA2D2,CACNA2D3,DUSP1,FOS,FRRS1L,GABRA1,GABRB2,GABRG2,GAD2,GRIA1,GRIA2,GRIN1,GRIN2B,GRIN3A,GRM7,HOMER1,HSPA1A/HSPA1B,INHBA,KCNJ6,KCNMA1,KCNQ2,KCNQ3,KCNT2,NAMPT,NCDN,PPP1R9B,PTPRN2,RIMS1,ROGDI,SCG2,SH3GL2,SPTAN1,SPTBN2,SYN1,SYNGAP1,SYNJ1,TRIM9,TSC1	45
Neurological Disease, Organismal Injury and Abnormalities	Seizures	1.73e-15	Decreased	-2.788	bias	ANK3,ARHGEF7,BSN,CA3,CACNA1D,CACNA2D1,CACNA2D2,CACNA2D3,DUSP1,FOS,GABRA1,GABRB2,GABRG2,GAD2,GRIA1,GRIA2,GRIN1,GRIN2B,GRIN3A,GRM7,HOMER1,HSPA1A/HSPA1B,INHBA,KCNJ6,KCNMA1,KCNQ2,KCNQ3,NAMPT,NCDN,PPP1R9B,PTPRN2,RIMS1,SCG2,SH3GL2,SPTBN2,SYN1,SYNGAP1,SYNJ1,TRIM9,TSC1	40
Neurological Disease, Organismal Injury and Abnormalities	Epilepsy	4.62e-15		-0.447		ARHGEF7,ARHGEF9,BSN,CA3,CACNA1D,CACNA2D1,CACNA2D2,CACNA2D3,DUSP1,FOS,FRRS1L,GABRA1,GABRB2,GABRG2,GAD2,GRIA1,GRIN1,GRIN2B,GRIN3A,HOMER1,HSPA1A/HSPA1B,INHBA,KCNMA1,KCNQ2,KCNQ3,KCNT2,NAMPT,NCDN,ROGDI,SCG2,SPTAN1,SPTBN2,SYN1,SYNJ1,TRIM9	35
Neurological Disease, Organismal Injury and Abnormalities	Partial seizure	8.69e-12				CA3,CACNA2D1,CACNA2D2,CACNA2D3,GABRA1,GABRB2,GABRG2,GAD2,GRIA1,GRIN1,GRIN2B,GRIN3A,KCNQ2,KCNQ3	14
Neurological Disease, Organismal Injury and Abnormalities	Subarachnoid hemorrhage	6.65e-10				CACNA1D,CACNA2D1,CACNA2D2,CACNB3,GABRA1,GABRB2,GABRG2,GRIA1,GRIN1,GRIN2B,GRIN3A,VKORC1	12
Neurological Disease, Organismal Injury and Abnormalities	Neuralgia	2.41e-09				CACNA2D1,CACNA2D2,CACNA2D3,GAD2,GRIA1,GRIN1,GRIN2B,GRIN3A,TRPV1	9
Neurological Disease, Organismal Injury and Abnormalities	Tonic-clonic seizure	3.21e-09		-1.342	bias	CA3,CACNA2D1,CACNA2D2,CACNA2D3,GABRA1,GABRB2,GABRG2,GAD2,GRIA1,GRIA2,KCNJ6,SYN1	12
Neurological Disease, Organismal Injury and Abnormalities	Early-onset encephalopathy	9e-09				ARHGEF9,CACNA2D2,FRRS1L,GABRA1,GABRB2,GABRG2,GRIN2B,KCNQ2,KCNQ3,KCNT2,OPA1,PARK7,SPTAN1,SYNJ1	14
Neurological Disease, Organismal Injury and Abnormalities	Localization-related epilepsy	1.25e-08				CA3,CACNA2D1,CACNA2D2,CACNA2D3,GABRA1,GABRB2,GABRG2,GAD2,GRIA1,GRIN2B,KCNQ2,SPTAN1	12
Neurological Disease, Organismal Injury and Abnormalities	Encephalopathy with early-onset epilepsy	1.42e-08				ARHGEF9,CACNA2D2,FRRS1L,GABRA1,GABRB2,GABRG2,GRIN2B,KCNQ2,KCNQ3,KCNT2,SPTAN1,SYNJ1	12
Neurological Disease, Organismal Injury and Abnormalities	Headache	5.8e-08				CA3,CACNA1D,CACNA2D1,CACNA2D2,CACNA2D3,CACNB3,CRP,GABRA1,GABRB2,GABRG2,GAD2,GRIN1,GRIN2B,GRIN3A,MAOA	15
Neurological Disease, Organismal Injury and Abnormalities	Infantile or early childhood epileptic encephalopathy	1.27e-07				ARHGEF9,CACNA2D2,FRRS1L,GABRA1,GABRB2,GABRG2,GRIN2B,KCNQ2,KCNT2,SPTAN1,SYNJ1	11
Neurological Disease, Organismal Injury and Abnormalities	Migraines	1.54e-07				CA3,CACNA1D,CACNA2D1,CACNA2D2,CACNA2D3,CRP,GABRA1,GABRB2,GABRG2,GAD2,GRIN1,GRIN2B,GRIN3A,MAOA	14
Neurological Disease, Organismal Injury and Abnormalities	Tonic-clonic epilepsy	5.04e-07				ARHGEF9,CA3,CACNA2D2,FRRS1L,GABRA1,GABRG2,GRIN2B,KCNQ2,KCNT2,SPTAN1,SYNJ1	11
Neurological Disease, Organismal Injury and Abnormalities	Encephalopathy with late-onset epilepsy	5.57e-07				CA3,GABRA1,GABRB2,GABRG2,GRIA1,GRIN1,GRIN2B,GRIN3A,KCNQ2	9
Neurological Disease, Organismal Injury and Abnormalities	Neuropathic pain	6.18e-07				CACNA2D1,CACNA2D2,CACNA2D3,GABRA1,GABRB2,GABRG2,GRIN1,GRIN2B,GRIN3A,TRPV1	10
Neurological Disease, Organismal Injury and Abnormalities	Primary tonic-clonic seizure	9.22e-07				CA3,CACNA2D1,CACNA2D2,CACNA2D3,GABRA1,GRIA1	6
Neurological Disease, Organismal Injury and Abnormalities	Abnormality of cerebrum	1.02e-06		-1.086		DBN1,DLG3,DNAJC5,FKBP8,GRIA2,GRIN1,GRIN2B,GRIN3A,KCNQ2,LLGL1,NAMPT,PHB2,PPP1R9B,RIMS1,SH3GL2,SHANK1,SHANK3,SYN1,SYNGAP1	19
Neurological Disease, Organismal Injury and Abnormalities	Epileptic seizure	1.43e-06		-1		ARHGEF7,BSN,DUSP1,FOS,GABRA1,GABRB2,GABRG2,GRIN1,HOMER1,HSPA1A/HSPA1B,INHBA,NAMPT,NCDN,SCG2,SPTBN2,TRIM9	16
Neurological Disease, Organismal Injury and Abnormalities	Abnormality of cerebral cortex	2.75e-06		-1.086		DBN1,DLG3,DNAJC5,GRIA2,GRIN1,GRIN2B,GRIN3A,KCNQ2,LLGL1,NAMPT,PHB2,PPP1R9B,RIMS1,SH3GL2,SHANK1,SHANK3,SYN1,SYNGAP1	18
Neurological Disease, Organismal Injury and Abnormalities	Complex partial seizure	2.88e-06				CACNA2D1,CACNA2D2,CACNA2D3,GABRA1,GABRB2,GABRG2,GAD2	7
Neurological Disease, Organismal Injury and Abnormalities	Postherpetic neuralgia	5.56e-06				CACNA2D1,CACNA2D2,CACNA2D3,GRIN3A,TRPV1	5
Neurological Disease, Organismal Injury and Abnormalities	Status epilepticus	8.9e-06				GABRA1,GABRB2,GABRG2,GRIN1,GRIN2B,GRIN3A	6
Neurological Disease, Organismal Injury and Abnormalities	Degeneration of brain	2.19e-05		-0.207	bias	ANK3,CACNA2D2,DNAJC5,DNM1L,FZD4,GRIA2,GRID2,GRIN1,GRIN2B,KCNJ6,SH3GL2	11
Neurological Disease, Organismal Injury and Abnormalities	Peripheral mononeuropathic pain	3.34e-05				CACNA2D1,CACNA2D2,CACNA2D3	3
Neurological Disease, Organismal Injury and Abnormalities	Peripheral neuropathic pain	3.34e-05				CACNA2D1,CACNA2D2,CACNA2D3	3
Neurological Disease, Organismal Injury and Abnormalities	Simple partial seizure	3.34e-05				CACNA2D1,CACNA2D2,CACNA2D3	3
Neurological Disease, Organismal Injury and Abnormalities	Neurodegeneration of brain	3.52e-05		0.043	bias	ANK3,CACNA2D2,DNAJC5,DNM1L,GRIA2,GRID2,GRIN1,GRIN2B,KCNJ6,SH3GL2	10
Neurological Disease, Organismal Injury and Abnormalities	Brain atrophy	4.36e-05				GRIA2,GRID2,GRIN1,GRIN2B,GRIN3A,KCNMA1,NAMPT,PARK7	8
Neurological Disease, Organismal Injury and Abnormalities	Tension headaches	9.38e-05				GABRA1,GABRB2,GRIN1,GRIN2B,GRIN3A	5
Neurological Disease, Organismal Injury and Abnormalities	Syndromic encephalopathy	0.000109				CACNA2D1,CACNA2D2,DNAJB6,GABRA1,GABRB2,GABRG2,GAD2,GRIA1,GRIN1,GRIN2B,GRIN3A,HADHA,OPA1,PARK7,PTPRN2,TSC1	16
Neurological Disease, Organismal Injury and Abnormalities	Cerebral atrophy	0.000115				GRIA2,GRIN1,GRIN2B,GRIN3A,NAMPT,PARK7	6
Neurological Disease, Organismal Injury and Abnormalities	Absence seizure	0.000325				CA3,GABRA1,GABRB2,GABRG2,GAD2	5
Neurological Disease, Organismal Injury and Abnormalities, Psychological Disorders	Disorder of basal ganglia	3.23e-12				ALDH6A1,ARHGEF7,ARL6IP5,ATP2A2,ATP5F1C,CACNA1D,CACNA2D3,CACNB3,Cdc42,CDH2,CRP,CTNNB1,CYCS,DGKB,DNAJB6,ENO3,FOS,GABRA1,GABRB2,GABRG2,GAD2,GHITM,GIT1,GPD1,GRIA1,GRIN1,GRIN2B,GRIN3A,GSTP1,HMOX2,HOMER1,HSPA1A/HSPA1B,KCNQ2,NDRG1,NDUFS2,PARK7,PFKFB1,PGRMC1,PSME1,SCG2,SH3GL2,SHANK3,SLC27A1,SNCB,STMN1,SYN1,SYNJ1,TGM1,TNNI2,TUBB4B	50
Neurological Disease, Organismal Injury and Abnormalities, Psychological Disorders	Dementia	3.67e-09				ADGRL1,APOB,ATP5PB,CA3,CACNA1D,CACNA2D1,CACNA2D2,CACNA2D3,CACNB3,CANX,CRP,DLGAP2,DNM1L,GABRA1,GABRB2,GABRG2,GAD2,GRIA2,GRIN1,GRIN2B,GRIN3A,HOMER1,HSPA1A/HSPA1B,MAOA,Nes,NPTX1,NTRK3,OPA1,PARK7,PLPPR4,PRDX1,RIMS1,RTN3,RYR2,SH3GL2,SNCB,SYNJ1,TGM1,VDAC1	39
Neurological Disease, Organismal Injury and Abnormalities, Psychological Disorders	Delirium	4.84e-08				CACNA2D1,CACNA2D2,CACNA2D3,CRP,GABRA1,GABRB2,GABRG2,GRIA1,GRIN1,GRIN2B,GRIN3A	11
Neurological Disease, Organismal Injury and Abnormalities, Psychological Disorders	Cognition disorder	1.42e-06				GABRA1,GABRB2,GABRG2,GRIA1,GRIN1,GRIN2B,GRIN3A	7
Neurological Disease, Organismal Injury and Abnormalities, Psychological Disorders	Tauopathy	2.7e-06				ADGRL1,ATP5PB,CANX,CRP,DLGAP2,DNM1L,GABRA1,GABRB2,GABRG2,GAD2,GRIA2,GRIN1,GRIN2B,GRIN3A,HOMER1,HSPA1A/HSPA1B,MAOA,Nes,NPTX1,NTRK3,OPA1,PARK7,PLPPR4,PRDX1,RIMS1,RTN3,RYR2,SH3GL2,SYNJ1,TGM1,TUBB4B,VDAC1	32
Neurological Disease, Organismal Injury and Abnormalities, Psychological Disorders	Alcohol withdrawal syndrome	4.02e-06				CACNA2D1,CACNA2D2,GABRA1,GABRB2,GABRG2,GAD2	6
Neurological Disease, Organismal Injury and Abnormalities, Psychological Disorders	Withdrawal syndrome	2.61e-05				CACNA2D1,CACNA2D2,GABRA1,GABRB2,GABRG2,GAD2,GRIA1	7
Neurological Disease, Organismal Injury and Abnormalities, Psychological Disorders	Frontotemporal dementia	0.000254				GRIA2,GRIN1,GRIN2B,GRIN3A,PARK7	5
Neurological Disease, Organismal Injury and Abnormalities, Psychological Disorders	Frontal lobe dementia	0.000268				GRIN1,GRIN2B,GRIN3A	3
Neurological Disease, Organismal Injury and Abnormalities, Psychological Disorders	Postoperative delirium	0.000268				CRP,GABRA1,GABRB2	3
Neurological Disease, Organismal Injury and Abnormalities, Psychological Disorders	Semantic dementia	0.000268				GRIN1,GRIN2B,GRIN3A	3
Neurological Disease, Organismal Injury and Abnormalities, Psychological Disorders, Skeletal and Muscular Disorders	Parkinson's disease	3.86e-06				ARL6IP5,CACNA1D,DNAJB6,GABRA1,GABRB2,GABRG2,GRIA1,GRIN1,GRIN2B,GRIN3A,GSTP1,HMOX2,PARK7,SH3GL2,SNCB,STMN1,SYN1,SYNJ1	18
Neurological Disease, Psychological Disorders	Schizophrenia	1.21e-08				ANK3,APOB,CA3,CACNA2D1,CACNA2D2,CACNA2D3,COL3A1,DLG3,DLG4,DUSP1,GABRA1,GABRB2,GABRG2,GAD2,GRIN1,GRIN2B,GRIN3A,GRM7,GSN,MAGI2,MAOA,NFKBIA,NPTX1,PCLO,PPP1R9B,RYR2,SCG2,SHANK3,SNCB,TSNAX,VDAC1	31
Neurological Disease, Psychological Disorders	Obsessive-compulsive spectrum disorder	7.95e-08				CA3,CACNA2D1,CACNA2D2,CACNA2D3,GABRA1,GABRB2,GABRG2,GRIN1,GRIN2B,GRIN3A,MAOA	11
Neurological Disease, Psychological Disorders	Obsessive-compulsive disorder	2.04e-07				CA3,CACNA2D1,CACNA2D2,CACNA2D3,GABRA1,GRIN1,GRIN2B,GRIN3A,MAOA	9
Neurological Disease, Psychological Disorders	Post-traumatic stress disorder	3.38e-07				CA3,CACNA2D1,CACNA2D2,CACNA2D3,GABRA1,GABRB2,GABRG2,GAD2,GRIN1,GRIN2B,GRIN3A	11
Neurological Disease, Psychological Disorders	Bipolar disorder	5.37e-07				ANK3,ATP5F1C,CA3,DLG3,DLG4,GABRA1,GABRB2,GABRG2,GAD2,GRIA1,GRIA2,GRIN1,GRIN2B,GRIN3A,MAOA,MCCC1,PRDX1,SYN1,UQCRC2	19
Neurological Disease, Psychological Disorders	Pervasive developmental disorder	8.37e-07				ABLIM2,ANK3,ARHGEF11,GABRA1,GABRB2,GABRG2,GAD2,GRIN1,GRIN2B,GRIN3A,MAOA,NLGN1,RYR2,SHANK2,SHANK3,TSC1	16
Neurological Disease, Psychological Disorders	Bipolar spectrum disorder	4.14e-06				DLG3,GABRA1,GABRB2,GABRG2,GAD2,GRIN1,GRIN2B,GRIN3A	8
Neurological Disease, Psychological Disorders	Attention deficit hyperactivity disorder	1.04e-05				GABRA1,GABRB2,GABRG2,GAD2,GRIN1,GRIN2B,GRIN3A,MAOA	8
Neurological Disease, Psychological Disorders	Bipolar depression	2.92e-05				GABRA1,GABRB2,GABRG2,GAD2,GRIN1,GRIN2B,GRIN3A	7
Neurological Disease, Psychological Disorders	Sleep Disorders	6.15e-05				CACNA2D1,CACNA2D2,CACNA2D3,DLGAP3,FOS,GABRA1,GABRB2,GABRG2,GRIN3A,PER1	10
Neurological Disease, Psychological Disorders	Pervasive developmental disorder not otherwise specified	0.000114				GRIN1,GRIN2B,GRIN3A	3
Neurological Disease, Psychological Disorders	Bipolar I disorder	0.000159				DLG3,GABRA1,GABRB2,GABRG2,GAD2,GRIN1	6
Neurological Disease, Psychological Disorders	Mania	0.000261				CACNA1D,CACNB3,GABRA1,GABRB2,GABRG2,GAD2	6
Neurological Disease, Psychological Disorders	Restless legs syndrome	0.00041				CA3,CACNA2D1,CACNA2D2,CACNA2D3,GABRA1	5
Neurological Disease, Respiratory Disease, Skeletal and Muscular Disorders	Laryngismus	0.000132				GABRA1,GABRB2,GABRG2,GRIA1	4
Neurological Disease, Skeletal and Muscular Disorders	Neuromuscular disease	8.73e-12				ALCAM,ALDH6A1,ARHGEF7,ARL6IP5,ATP2A2,ATP5F1C,CA3,CACNA1D,CACNA2D3,CACNB3,CANX,Cdc42,CDH2,CRP,CTNNB1,CYCS,DGKB,DNAJB6,ENO3,FOS,GABRA1,GABRB2,GABRG2,GAD2,GHITM,GIT1,GPD1,GRIA1,GRIN1,GRIN2B,GRIN3A,GSTP1,HMOX2,HOMER1,HSPA1A/HSPA1B,KCNA6,KCNMA1,KCNQ2,NDRG1,NDUFS2,PARK7,PFKFB1,PGRMC1,PSME1,SCG2,SH3GL2,SLC27A1,SNCB,STMN1,SYN1,SYNJ1,TGM1,TNNI2,UQCRC2	54
Nucleic Acid Metabolism, Small Molecule Biochemistry	Metabolism of purine nucleotide	0.000208				AK3,AK4,ATP5F1C,ATP5PB,DCXR,GPD1,HSPA1A/HSPA1B,MCCC2	8
Nucleic Acid Metabolism, Small Molecule Biochemistry	Metabolism of nucleoside triphosphate	0.000259		1.964	bias	AK3,AK4,ATP5F1C,ATP5PB,CYCS,DNM1L,HSPA1A/HSPA1B,OPA1,SLC25A5,VDAC1	10
Nucleic Acid Metabolism, Small Molecule Biochemistry	Metabolism of nucleotide	0.000325	Increased	2.179		ACPP,ADCY6,AK3,AK4,ATP5F1C,ATP5PB,CYCS,DCXR,DNM1L,GPD1,GUCY1A2,HSPA1A/HSPA1B,INHBA,MCCC2,NAMPT,OPA1,SLC25A5,SNX1,TALDO1,VDAC1	20
Nutritional Disease	Obesity	7.17e-06	Increased	2.059		APOB,ARHGEF11,ATRN,CA3,CACNA1D,CACNA2D1,CACNB3,CRP,DUSP1,GABRA1,GABRB2,GABRG2,GAD2,GRIN1,GRIN2B,GRIN3A,HSPA1A/HSPA1B,MAOA,MARK2,MARK3,NAMPT,PPP1R9B,PRKAA1,RBP1,REN,SLC27A1,TRPV1,TSC1	28
Nutritional Disease	Severe obesity	0.000325				GABRA1,GABRB2,GABRG2,GAD2,GRIN1,GRIN2B,GRIN3A	7
Nutritional Disease, Psychological Disorders	Binge eating disorder	0.000254				CA3,GABRA1,GRIN1,GRIN2B,GRIN3A	5
Ophthalmic Disease, Organismal Injury and Abnormalities	Abnormal electrophysiology of eye	0.000177				APOB,DNAJC5,ERC2,FOS,GRIN3A,NPTX1,RBP1	7
Organismal Development	Size of body	1.27e-11	Increased	4.899	bias	APOB,ARHGEF11,ARL6IP5,ATP2A2,ATRN,CACNA1D,CACNA2D2,CANX,CC2D1A,CD9,CLIC4,COL2A1,COL3A1,CTBP1,DLGAP3,DNAJC5,DUSP1,FKBP8,FOS,GABRA1,GAD2,GIT1,GPD2,GRIA1,GRIA2,GSTZ1,IP6K1,KCNMA1,MARK2,MARK3,NBN,NDRG1,Nes,NFKBIA,NLGN1,NLGN2,NTRK3,PCLO,PER1,PLEC,PPP1R9B,PTPN9,PTPRS,REN,SH3GL2,SHANK2,SHANK3,SNCB,SNX1,SYNGAP1,TGM1,TSC1	52
Organismal Development	Morphology of head	2.87e-07				ANK3,ANKH,APOB,ATAT1,CACNA2D2,CACNB3,CLIC4,COL2A1,CRELD1,CTNNB1,DBN1,DLG3,DLGAP3,DNAJC5,ERC2,FKBP8,FOS,GABRB2,GCLM,GDF11,GPHN,GRIA2,GRID2,GRIN1,GRIN2B,INHBA,LHX1,LLGL1,MAOA,MPP4,NBN,NTRK3,PARK7,PPP1R9B,PRKAA1,PTPN9,PTPRS,RBP1,RIMS1,SHANK1,SHANK2,SHANK3,SNCB,SPTBN2,STMN1,SYN1,SYNGAP1,TSC1,VAMP7	49
Organismal Development, Organismal Injury and Abnormalities	Abnormal morphology of head	1.34e-05				ANK3,ANKH,APOB,CACNA2D2,CACNB3,COL2A1,CRELD1,DBN1,DLG3,DLGAP3,DNAJC5,ERC2,FKBP8,FOS,GABRB2,GCLM,GDF11,GPHN,GRIA2,GRID2,GRIN1,GRIN2B,INHBA,LHX1,LLGL1,MPP4,NTRK3,PARK7,PPP1R9B,PRKAA1,PTPN9,PTPRS,RBP1,RIMS1,SHANK1,SHANK2,SHANK3,SNCB,STMN1,SYN1,SYNGAP1	41
Organismal Functions	Movement of rodents	2.45e-05				ANK3,ARL6IP5,DLG4,DNAJC5,Gk,GRIA2,GRID2,LHX1,PARK7,SHANK1,SHANK2,SHANK3,TGM1,TSC1	14
Organismal Functions	Weakness	0.000171		-0.152	bias	ABHD12,CACNA2D1,CACNA2D2,DNAJB6,DNAJC5,JAM3,NDRG1,PLEC,SYNGAP1,SYNJ1,UNC13A	11
Organismal Functions	Hypoactivity of mice	0.000179				ANK3,ARL6IP5,DLG4,DNAJC5,Gk,GRIA2,GRID2,PARK7,SHANK1,SHANK3,TGM1	11
Organismal Injury and Abnormalities	Postoperative pain	4.13e-08				CACNA2D1,CACNA2D2,CACNA2D3,CRP,GABRA1,GABRB2,GABRG2,GRIA1,GRIN1,GRIN2B,GRIN3A,KCNJ6	12
Organismal Injury and Abnormalities	Intracranial hemorrhage	4.23e-08				CACNA1D,CACNA2D1,CACNA2D2,CACNB3,GABRA1,GABRB2,GABRG2,GRIA1,GRIN1,GRIN2B,GRIN3A,JAM3,LLGL1,PTPN9,VKORC1	15
Organismal Injury and Abnormalities	Discomfort	7.3e-08				CA3,CACNA1D,CACNA2D1,CACNA2D2,CACNA2D3,CACNB3,CRP,GABRA1,GABRB2,GABRG2,GAD2,GRIA1,GRIN1,GRIN2B,GRIN3A,GUCY1A2,KCNJ6,MAOA,PPP1R9B,SLC25A5,STX8,TRPV1,TUBB4B	23
Organismal Injury and Abnormalities	Refractory pain	5.08e-07				CACNA2D1,CACNA2D2,CACNA2D3,GRIN1,GRIN2B,GRIN3A	6
Organismal Injury and Abnormalities	Low back pain	1.35e-06				CACNA2D1,CACNA2D2,CACNA2D3,GABRA1,GABRB2,GABRG2,GRIN1,GRIN2B,GRIN3A	9
Organismal Injury and Abnormalities	Bleeding	1.39e-06		-1.992	bias	APOB,CACNA1D,CACNA2D1,CACNA2D2,CACNB3,COL2A1,CRP,CTBP1,DNM1L,FOS,GABRA1,GABRB2,GABRG2,GIT1,GRIA1,GRIN1,GRIN2B,GRIN3A,GUCY1A2,INHBA,JAM3,LLGL1,NTRK3,PLEC,PTPN9,VKORC1	26
Organismal Injury and Abnormalities	Organ Degeneration	5.53e-06		-1.341	bias	ABHD12,ANK3,CACNA1D,CACNA2D2,CD151,CD9,Cdc42,DNAJC5,DNM1L,FAH,FZD4,GABRB2,GRIA2,GRID2,GRIN1,GRIN2B,GSTZ1,HADHA,HK1,KCNJ6,KCNMA1,MAOA,NTRK3,PLEC,RBP1,RIMS1,SH3GL2,TMOD1,TRIM28	29
Organismal Injury and Abnormalities	Benign lesion	2.43e-05		-0.19		ADGRL1,ALCAM,ATP2A2,ATRN,CACNA1D,CDH2,COL2A1,COL3A1,CRP,CRYZ,CTNNB1,DBN1,DNM1L,DUSP1,ENO3,FAH,FOS,GDF11,GLTP,GRIA2,GRIN1,GRIN2B,GSTP1,GUCY1A2,INHBA,MAOA,NBN,NDRG1,PARK7,PIP5K1C,PRDX1,RAB9A,SCG2,SH3GL2,SNPH,SPTAN1,TNNI2,TRPV1,TSC1,TUBB4B,UNC13A	41
Organismal Injury and Abnormalities	Central pain	3.34e-05				CACNA2D1,CACNA2D2,CACNA2D3	3
Organismal Injury and Abnormalities	Chronic pain	0.000107				CACNA2D1,CACNA2D2,CACNA2D3,GRIN1,GRIN2B,GRIN3A,PPP1R9B	7
Organismal Injury and Abnormalities, Renal and Urological Disease	Renal impairment	1.3e-07		0	bias	AOC3,APOB,CA3,CACNA1D,CACNA2D1,CACNA2D2,CD151,CRP,DUSP1,GABRA1,GABRB2,GABRG2,GRIA1,GSTP1,GUCY1A2,MAGI2,REN,STMN1,TRPV1,VKORC1	20
Organismal Injury and Abnormalities, Renal and Urological Disease	Failure of kidney	3.54e-06		0	bias	APOB,CACNA1D,CACNA2D1,CD151,CRP,DUSP1,GABRA1,GABRB2,GABRG2,GRIA1,GSTP1,GUCY1A2,MAGI2,REN,STMN1,TRPV1,VKORC1	17
Organismal Injury and Abnormalities, Renal and Urological Disease	Chronic kidney disease	5.25e-06				APOB,CA3,CACNA1D,CACNA2D1,CACNA2D2,CACNA2D3,CD151,CRP,GABRA1,GABRB2,GABRG2,GRIA1,MAGI2,REN,TRPV1,TUBB4B,VKORC1	17
Organismal Injury and Abnormalities, Renal and Urological Disease	Chronic renal failure	6.05e-06				APOB,CACNA1D,CACNA2D1,CD151,CRP,GABRA1,GABRB2,GABRG2,GRIA1,MAGI2,REN,TRPV1,VKORC1	13
Organismal Injury and Abnormalities, Renal and Urological Disease	Urination disorder	0.00011		0.675	bias	ADCY6,CACNA1D,CACNA2D1,CACNA2D2,CD151,CRP,CTNNB1,FAH,GSTZ1,IVD,KCNMA1,MAGI2,MARK2,MCCC1,MCCC2,REN,TRPV1	17
Organismal Injury and Abnormalities, Renal and Urological Disease	End-stage chronic kidney disease	0.000132				GABRA1,GABRB2,GABRG2,GRIA1	4
Organismal Injury and Abnormalities, Renal and Urological Disease	End-stage renal failure	0.000132				GABRA1,GABRB2,GABRG2,GRIA1	4
Organismal Injury and Abnormalities, Renal and Urological Disease	Severe acute renal failure	0.000132				GABRA1,GABRB2,GABRG2,GRIA1	4
Organismal Injury and Abnormalities, Renal and Urological Disease	End stage renal disease	0.000193				CD151,CRP,GABRA1,GABRB2,GABRG2,GRIA1,MAGI2,REN,TRPV1,VKORC1	10
Organismal Injury and Abnormalities, Reproductive System Disease	Disorder of pregnancy	2.54e-05				ADCY6,ADGRL1,AOC3,ATP2A2,ATP6AP1,CACNA1D,CACNA2D1,CACNA2D2,DNAJB6,ELAC2,FZD4,GRIN1,GRIN2B,GRIN3A,GSN,GSTP1,HADHA,MAOA,NLGN1,NTRK3,PPP1R14A,PTP4A2,REN,SCG2,SHANK3,TMOD1,TRPV1,TUBB4B,ZFYVE27	29
Organismal Injury and Abnormalities, Respiratory Disease	Obstruction of airway	9.66e-05				CA3,GABRA1,GABRB2,GABRG2,GRIA1,GRIN1,GRIN2B,GRIN3A	8
Organismal Injury and Abnormalities, Respiratory Disease	Edema of lung	0.000375				ATP2A2,CA3,CRP,DUSP1,GABRA1,GABRB2,GABRG2	7
Organismal Injury and Abnormalities, Skeletal and Muscular Disorders	Fibromyalgia	0.000342				CACNA2D1,CACNA2D2,CACNA2D3,GABRA1,GABRB2,GABRG2	6
Organismal Survival	Organismal death	7.51e-12	Decreased	-6.104	bias	AFDN,ANK3,ANKH,APOB,ARHGEF11,ARL5A,ATP2A2,ATP6AP1,CACNA2D2,CANX,CASK,CC2D1A,CD151,Cdc42,CDH2,CLIC4,COL2A1,COL3A1,COPS8,CRELD1,CRP,CSAD,CTBP1,CTNNB1,CYCS,DNAJB6,DNAJC5,DNM1L,DUSP1,FAH,FKBP1B,FKBP8,FNTB,FOS,GABRA1,GABRG2,GAD2,GCLM,GDF11,GFER,GIT1,Gk,GPD2,GPHN,GRIA2,GRID2,GRIN1,GRIN2B,GSN,GSTP1,GSTZ1,HACE1,HADHA,HMOX2,INHBA,JAM3,KCNJ6,KCNMA1,KCNQ2,LHX1,LLGL1,Macf1,MADD,MAGI2,MARK2,MARK3,Mff,NBN,NDRG…	106
Organismal Survival	Neonatal death	9.05e-08	Decreased	-4.448	bias	ATP2A2,CASK,CC2D1A,COL2A1,FAH,FKBP8,FOS,GDF11,GIT1,GPHN,GRIN1,GRIN2B,HADHA,INHBA,KCNQ2,LLGL1,MADD,MAGI2,NLGN1,NLGN2,PIP5K1C,PTPRS,RIMS1,SH3GL2,SYNJ1,TGM1,TSC1,UNC13A	28
Organismal Survival	Perinatal death	1.98e-06	Decreased	-3.842	bias	ATP2A2,CASK,CC2D1A,COL2A1,FAH,FKBP8,FOS,GABRA1,GDF11,GIT1,GPHN,GRIN1,GRIN2B,HADHA,INHBA,KCNQ2,LHX1,LLGL1,MADD,MAGI2,NBN,NLGN1,NLGN2,PIP5K1C,PTPRS,RIMS1,SH3GL2,SYNJ1,TGM1,TSC1,UNC13A	31
Post-Translational Modification	Dephosphorylation of protein	0.000428				ACPP,ALPP,DUSP1,NCEH1,PPM1G,Ppp1cc,PTPN9,PTPRN2,PTPRS	9
Post-Translational Modification, Protein Synthesis, Protein Trafficking	Tetramerization of protein	4.16e-05				ACPP,CRYZ,DCXR,DNM1L,GRIA2,GRIN1,GRIN2B,KCNMA1,NLGN1,NUDT21,TRPV1	11
Protein Synthesis	Polymerization of protein	1.86e-09				ACPP,AK3,ATL1,CAMK2D,CDH2,CRP,CRYZ,CTNNB1,DCXR,DNM1L,GPHN,GRIA2,GRIN1,GRIN2B,GSN,IVD,KCNMA1,MAGI2,MICU1,MPP2,NLGN1,NUDT21,OPA1,PAM,PRKAA1,SHANK3,STOML2,TRIM28,TRPV1,TSC1	30
Protein Synthesis	Oligomerization of protein	4.26e-07				AK3,ATL1,CAMK2D,CDH2,CTNNB1,DNM1L,GPHN,IVD,KCNMA1,MAGI2,MICU1,MPP2,NLGN1,OPA1,PAM,PRKAA1,SHANK3,STOML2,TRIM28,TSC1	20
Protein Trafficking	Interaction of protein	2.55e-05	Decreased	-2.219		ACPP,CANX,CD9,Cdc42,CRYZ,CYCS,DCXR,DNM1L,GRIA2,GRIN1,GRIN2B,KCNMA1,NFKBIA,NLGN1,NUDT21,TGM1,TRPV1	17
Protein Trafficking	Recruitment of protein	0.000215				ANK3,DLG4,GPHN,GRIA2,NLGN1,USP19	6
Psychological Disorders	Schizophrenia spectrum disorder	1.34e-08				ANK3,APOB,CA3,CACNA2D1,CACNA2D2,CACNA2D3,COL3A1,DLG3,DLG4,DUSP1,GABRA1,GABRB2,GABRG2,GAD2,GRIN1,GRIN2B,GRIN3A,GRM7,GSN,MAGI2,MAOA,NFKBIA,NPTX1,PCLO,PPP1R9B,RYR2,SCG2,SHANK2,SHANK3,SNCB,TSNAX,VDAC1	32
Psychological Disorders	Mood Disorders	7.31e-08				ANK3,ATP5F1C,CA3,CACNA1D,CACNA2D1,CACNA2D2,CACNA2D3,CACNB3,CRP,DLG3,DLG4,FNTB,GABRA1,GABRB2,GABRG2,GAD2,GRIA1,GRIA2,GRIN1,GRIN2B,GRIN3A,MAOA,MCCC1,PPP1R9B,PRDX1,PRUNE1,SYN1,UQCRC2	28
Psychological Disorders	Opioid-related disorder	3.08e-07				CA3,CACNA2D1,CACNA2D2,GABRA1,GABRB2,GABRG2,GAD2,GRIN1,GRIN2B,GRIN3A	10
Psychological Disorders	Opioid dependence	5.57e-07				CACNA2D1,CACNA2D2,GABRA1,GABRB2,GABRG2,GAD2,GRIN1,GRIN2B,GRIN3A	9
Psychological Disorders	Hyperactive behavior	6.12e-07	Decreased	-3.679	bias	ABHD12,ARHGEF11,FOS,GABRB2,GABRG2,GRIA1,GRIA2,KCNQ2,NAMPT,PER1,SHANK2,SHANK3,SYNGAP1,TMEM35A	14
Psychological Disorders	Alcohol use disorder	1.28e-06				ALPP,CA3,CACNA2D1,CACNA2D2,CACNA2D3,COL3A1,GABRA1,GABRB2,GABRG2,GAD2,GRIN1,GSTP1	12
Psychological Disorders	Substance-Related Disorders	1.4e-06				ALPP,CA3,CACNA2D1,CACNA2D2,CACNA2D3,COL3A1,GABRA1,GABRB2,GABRG2,GAD2,GRIN1,GRIN2B,GRIN3A,GSTP1,MAOA	15
Psychological Disorders	Alcoholism	1.87e-06				CA3,CACNA2D1,CACNA2D2,CACNA2D3,GABRA1,GABRB2,GABRG2,GAD2,GRIN1,GRIN2B,GRIN3A,MAOA	12
Psychological Disorders	Agitation	5.27e-06				GABRA1,GABRB2,GABRG2,GAD2,GRIA1,GRIN1,GRIN2B,GRIN3A	8
Psychological Disorders	Panic disorder	6.3e-06				GABRA1,GABRB2,GABRG2,GRIN1,GRIN2B,GRIN3A,MAOA	7
Psychological Disorders	Anxiety Disorders	6.43e-06				CA3,CACNA2D1,CACNA2D2,CACNA2D3,GABRA1,GABRB2,GABRG2,GAD2,GRIN1,GRIN2B,GRIN3A,MAOA	12
Psychological Disorders	Generalized anxiety disorder	8.36e-06				CA3,CACNA2D1,CACNA2D2,CACNA2D3,GABRA1,GABRB2,GABRG2,GRIN1	8
Psychological Disorders	Phobic anxiety disorder	1.07e-05				GABRA1,GABRB2,GABRG2,GRIN1,GRIN2B,GRIN3A	6
Psychological Disorders	Drug abuse	1.62e-05				GABRA1,GABRB2,GABRG2,GAD2,GRIN1,GRIN2B,GRIN3A	7
Psychological Disorders	Depressive disorder	2.14e-05				CA3,CACNA1D,CACNA2D1,CACNA2D2,CACNA2D3,CRP,DLG3,FNTB,GABRA1,GABRB2,GABRG2,GAD2,GRIA1,GRIN1,GRIN2B,GRIN3A,MAOA,PRUNE1	18
Psychological Disorders	Major affective disorder	2.39e-05				ANK3,ATP5F1C,CA3,DLG3,DLG4,FNTB,GABRA1,GABRB2,GABRG2,GAD2,GRIA1,GRIA2,GRIN1,GRIN2B,GRIN3A,MAOA,MCCC1,PRDX1,PRUNE1,SYN1,UQCRC2	21
Psychological Disorders	Severe depressive disorder	0.000114				GRIN1,GRIN2B,GRIN3A	3
Psychological Disorders	Treatment resistant depression	0.000129				GABRA1,GABRB2,GABRG2,GRIN1,GRIN2B,GRIN3A	6
Psychological Disorders	Peripartum depression	0.000181				GRIN1,GRIN2B,GRIN3A	3
Psychological Disorders	Social anxiety disorder	0.000402				CA3,GABRA1,GABRB2,GABRG2,GRIN1,GRIN2B,GRIN3A	7
Psychological Disorders	Non-affective psychosis	0.000443				GABRA1,GABRB2,GABRG2,GRIN1,GRIN2B,GRIN3A	6
Reproductive System Development and Function	Litter size	3.55e-05		1.155	bias	ACSL4,ATAT1,ATP2A2,CD9,CLIC4,GABRA1,GPD2,INHBA,KCNMA1,MARK2,PER1,PHB2,PTPRS	13
Respiratory Disease	Respiratory depression	9.05e-08				CACNA2D1,CACNA2D2,GABRA1,GABRB2,GABRG2,GRIA1,GRIN1,GRIN2B,GRIN3A	9
Respiratory Disease	Abnormal respiration	2.33e-05				CYCS,DUSP1,HMOX2,NLGN1,NLGN2,PARK7,PLEC	7
Respiratory Disease	Apnea	4.8e-05				CA3,CACNA1D,CACNA2D1,GABRA1,GABRB2,GABRG2,GPHN,GRIA1,GRIN1	9
Respiratory Disease	Sleep apnea syndrome	0.000402				CA3,CACNA1D,CACNA2D1,GABRA1,GABRB2,GABRG2,GRIA1	7
Skeletal and Muscular System Development and Function	Function of muscle	7.34e-07	Increased	2.155	bias	ADCY6,APOB,ATP2A2,CACNA1D,CACNA2D1,CACNB3,Cdc42,DNAJC5,DNM1L,DUSP1,FKBP1B,FZD4,HOMER1,INHBA,KCNMA1,MAOA,PFKFB1,PLEC,PRKAA1,RYR2,TMEM38A,USP19	22
Tissue Development	Organization of nervous tissue	1.58e-05				ANK3,CTNNB1,MAOA,NLGN1,NLGN2,SNCB,SPTBN2,TSC1	8
Tissue Morphology	Quantity of cells	2.53e-07		1.107		AGTRAP,ALCAM,ANK3,AOC3,APOB,ARHGEF11,ARHGEF6,ARHGEF7,BSN,CACNA1D,CACNA2D2,CAMK2D,CANX,CD151,CD9,Cdc42,CLIC4,CRP,CTNNB1,DLG4,DLGAP3,DNM1L,DUSP1,ERC2,FAH,FOS,GABRA1,GABRG2,GAD2,GDF11,GFER,GIT1,GPHN,GRID2,GRIN1,GRIN2B,GSN,GSTP1,GSTZ1,HOMER1,INHBA,JAM3,LHX1,LLGL1,MADD,MAOA,MARK2,NBN,Nes,NFKBIA,NLGN1,NPTX1,NTRK3,PARK7,PCLO,PER1,Ppp1cc,PRDX1,PRKAA1,PTPRN2,PTPRS,RBP1,REN,RIMS1,SH3GL2,SNCB,SPTBN2,SRCIN1,…	74
