# Supplementary material for: Noninvasive Brain Stimulation Enhances Memory Acquisition and Is Associated with Synaptoneurosome Modification in the Rat Hippocampus
Source: eNeuro. 2019 Dec 3;6(6):ENEURO.0311-19.2019. doi: 10.1523/ENEURO.0311-19.2019 (PMC6900464; doi:10.1523/ENEURO.0311-19.2019)
Supplement: Extended Data Figure 3-3 — Lists of IPA-generated networks for the comparisons between retrieval and sham groups and between acquisition and sham groups Download Figure 3-3, XLSX file. [file sup_enu-eN-NWR-0311-19-s10.xlsx]

## Sheet: Sheet0
© 2000-2018 QIAGEN. All rights reserved.
ID	Analysis	Top Diseases and Functions	Molecules in Network	Score	Focus Molecules
1	Retrieval-Sham	Neurological Disease, Organismal Injury and Abnormalities, Psychological Disorders	Abcb1b,CKB,CRYZ,Dync1i2,EGLN,EGLN1,ENO2,ERK1/2,GARS,glutathione peroxidase,GPX4,GSR,Hif,Hif1,Ldh (complex),LDHB,Ngf,NOS1,PARK7,PCP4,PDK1,PFK,PFKM,PFKP,PGK1,PGM1,PSMA,SARS,SHOC2,Sod,SOD1,SPG7,SUMO,UBA5,UCHL1	43	24
2	Retrieval-Sham	Gastrointestinal Disease, Inflammatory Disease, Cell-To-Cell Signaling and Interaction	20s proteasome,AMPK,ATAD3A,Calcineurin protein(s),CLCN3,cytochrome C,cytochrome-c oxidase,DPYSL3,GABA-A receptor,GABRA4,GABRB2,glutathione transferase,GST,GSTA3,GSTM3,GSTM5,HPRT1,Jnk,MAPT,MPG,MT-CO2,NADPH oxidase,NCS1,PARP,PKM,PSMA2,PSMA6,SCYL1,SNCG,SRGAP2,SUMO3,SV2C,TRIO,VANGL2,YME1L1	43	24
3	Retrieval-Sham	Small Molecule Biochemistry, Cellular Assembly and Organization, Developmental Disorder	AARS,BLNK,BLVRA,C16orf70,CALML3,CFL1,Cofilin,DPYSL2,EIPR1,EXOC6,FABP3,Fcer1,GAD1,HINT1,Ikb,KLHL22,LHX1,LOC100359583/Ptma,MAP2K1/2,MICU1,MYO1E,NFAT (complex),NFkB (complex),OGT,PADI2,Pak,PDGF BB,PLC gamma,PP2A,PPM1F,Ppp2c,PRDX2,Rock,UFL1,WDR81	40	23
4	Retrieval-Sham	Lipid Metabolism, Small Molecule Biochemistry, Carbohydrate Metabolism	14-3-3,ACVR1B,ADK,Akt,Alpha tubulin,Calcineurin A,CDK4/6,Cytoplasmic Dynein,DYNC1LI1,Dynein,EIF5B,EML2,F Actin,FHIT,FNTB,GDF11,Hsp90,Nfat (family),PAFAH1B1,PAFAH1B2,PFKFB1,PRKACB,PRKAR1B,PTP4A2,RABGGTB,Raf,SLC4A7,SNF8,TRAF3IP1,TUBA1C,TUBA4A,tubulin,tubulin (family),VPS25,WASHC1	38	22
5	Retrieval-Sham	Cellular Function and Maintenance, Molecular Transport, Cell Morphology	26s Proteasome,ADRB,Alp,ARHGAP27,ARHGDIA,ARHGEF6,BOK,CACNA1D,calpain,CaMKII,CAPN5,CSDE1,DAB1,Dishevelled,Dynamin,E2f,EIF2B4,Gsk3,GTPase,Hdac,HISTONE,HSP,Hsp70,HSPA4,ILK,LAMP1,MAPK8,NSFL1C,PFN2,PI3K (complex),Rb,Smad2/3,TOMM34,Ubiquitin,WNK1	27	17
6	Retrieval-Sham	Cellular Assembly and Organization, Cellular Function and Maintenance, Cell-To-Cell Signaling and Interaction	ABI2,ACAA2,ACBD6,AGO1,AK4,APP,ARHGAP17,C11orf54,CALHM5,CCDC39,CDK6,CDKL3,CUL3,EIF3J,EIF4G2,EXOC6,GALE,HOOK3,L-tyrosine,MLLT6,MRI1,NMT2,NTRK1,PNPO,PREPL,PRPSAP2,PTPRC,PTPRO,PYCR3,RASA1,RASGRF1,SRP68,TARBP2,VANGL2,WASL	22	15
7	Retrieval-Sham	Amino Acid Metabolism, Post-Translational Modification, Small Molecule Biochemistry	ALB,AMPD3,Arp2/3,BCR (complex),CBS/CBSL,COL3A1,DHCR7,EHD3,ERK,FSCN1,GOT1,HDL,hemoglobin,ICOS,Iga,Ige,IgG,IgG1,Igg3,IgG2b,Igm,IL12 (complex),Immunoglobulin,JUN/JUNB/JUND,LCK,LDL,LFNG,Nos,Pdi,PI3K (family),SPAST,SPON1,TF,Tgf beta,TH2 Cytokine	20	14
8	Retrieval-Sham	Cancer, Hematological Disease, Immunological Disease	ALDOA,AOC3,Ap1,caspase,Cg,collagen,Collagen(s),Creb,DEK,ERO1A,FSH,Growth hormone,IDH1,IL1,INHBA,Insulin,Lh,MAP2K2,Mek,MTORC1,MYBBP1A,NOP58,p85 (pik3r),PDXK,Pkc(s),RAS,RNA polymerase II,Rnr,RPS23,RRAGA,RUNX1,SLC20A1,Sos,TCR,Vegf	20	14
9	Retrieval-Sham	Amino Acid Metabolism, Post-Translational Modification, Small Molecule Biochemistry	Actin,Calmodulin,CD3,CDC20,CDH8,Ck2,Collagen type I,CSPG5,CSTB,cytokine,estrogen receptor,FAM213B,Focal adhesion kinase,GLS,Histone h3,Histone h4,HSPA1A/HSPA1B,IL12 (family),Interferon alpha,ITGAD,Mapk,NMDA Receptor,NUCB1,P38 MAPK,Pka,Rac,Ras homolog,SCAMP5,SELENBP1,SET,Sfk,SRC (family),STRAP,Tnf (family),XPO1	20	14
10	Retrieval-Sham	RNA Post-Transcriptional Modification, Cellular Function and Maintenance, Cardiovascular Disease	60S ribosomal subunit,AGO1,AMMECR1,ARL1,ASRGL1,BOP1,CBR4,CDKAL1,DIP2B,ELAVL1,FANCD2,GCC2,GJA1,GLYR1,GSK3B,HSD17B8,IGF2R,LMNB2,LPCAT4,NADK2,NCCRP1,PDE4DIP,PRELID3B,PSMD9,PYGB,Qars,RBMX2,RPL14,RPL18,RPL21,RPL27,RPL35A,SCRN1,SH2B3,TAB1	20	14
11	Retrieval-Sham	Cell Cycle, Gene Expression, Organismal Development	ACOT7,AES,AR,Cacnb1,CD48,CDKAL1,CFAP206,dihydrotestosterone,dopamine,DUSP1,EDC4,GLDN,HPCAL4,HSD3B2,IFNG,IGFBP5,IL6,Inhibin,KCNA3,LMNA,MAL,mir-19,OSBPL1A,PTPN22,PTPRB,SCN4A,SH2D1B,Slc25a1,SLC25A42,SPRYD7,SRP54,Svs2,SYN3,TAT,TSC22D3	20	14
12	Retrieval-Sham	Cancer, Inflammatory Disease, Inflammatory Response	ACYP2,ADGRL3,ANXA3,CCDC91,CCR7,CD55,CNTN6,CPNE7,CR1L,CST5,DLG4,DUB,ENPP1,ESR1,GABBR2,GNRHR,Gpcr,GPR158,KDELC2,KMT2D,MTOR,OSM,PDE4A,PGP,Prrt1,PTGR2,PTPRG,PTPRH,PTPRZ1,RGS1,SOS2,STAT,UFSP2,USP30,USP42	19	13
13	Retrieval-Sham	Connective Tissue Development and Function, Tissue Morphology, Cell-To-Cell Signaling and Interaction	ACAP2,CA1,CD44,CD8B,CNDP2,CYP11B1,DACH1,DHODH,ENOPH1,ENPP1,F13A1,FSTL1,FSTL3,GALM,GATA1,glycosylphosphatidylinositol,ITGB4,ITIH3,KLF13,LXN,MERTK,NCR2,PLOD2,RILPL1,SFTPC,SMAD3,ST3GAL6,STX18,TGFB1,TIMM44,TNF,TP53,Tpsab1,VCP,Zranb2	19	13
14	Retrieval-Sham	Post-Translational Modification, Cellular Movement, Cell Death and Survival	ARFGAP2,DGKA,DOK1,DOK2,FNTA,FRS2,Gap,INSR,L-tyrosine,MCRIP1,Mug1 (includes others),PTP4A1,PTPN12,PTPN22,PTPRB,PTPRC,PTPRE,PTPRF,PTPRG,PTPRH,PTPRJ,PTPRK,PTPRM,PTPRO,PTPRZ1,RASA1,RGS16,SHROOM2,SKAP2,SOS1,SRC,STAT,TUB,tyrosine kinase,YIF1B	5	5
15	Retrieval-Sham	Cardiac Arrythmia, Cardiovascular Disease, Cardiovascular System Development and Function	Cryzl2,PITX2	2	1
16	Retrieval-Sham	Cancer, Cell Death and Survival, Cell-To-Cell Signaling and Interaction	FIBIN,TWIST1	2	1
17	Retrieval-Sham	Cardiovascular Disease, Neurological Disease, Organismal Injury and Abnormalities	CLK1,GLP1R,SVOP	2	1
ID	Analysis	Top Diseases and Functions	Molecules in Network	Score	Focus Molecules
1	Acquisition-Sham	Cell-To-Cell Signaling and Interaction, Nervous System Development and Function, Cellular Assembly and Organization	ANKS1B,atypical protein kinase C,Camk,CASK,Dlg,DLG3,DLGAP1,DLGAP2,DLGAP3,ERK1/2,GRI,GRIA1,GRIA2,GRID2,GRIN1,GRIN2B,GRIN3A,Homer,HOMER1,HOMER3,JAM,JAM3,LLGL1,MAGI2,MPP2,MPP4,NCDN,NLGN1,NLGN2,SHANK1,SHANK2,SHANK3,SIPA1L1,SPTBN2,SYNGAP1	48	28
2	Acquisition-Sham	Cellular Development, Cellular Growth and Proliferation, Nervous System Development and Function	26s Proteasome,ABHD12,ACSL4,Actin,ADGRL1,ALCAM,BEGAIN,Calmodulin,calpain,CPNE7,CTBP1,CTNNB1,DLG4,DNAH7,ERMN,FZD4,GORASP2,Gpcr,GRM7,HSDL1,KCNJ6,Kcnn2,KLHDC8B,LHX1,NTRK3,PSME1,RAB9A,RIMBP2,Sfk,SFXN3,Skor1,Spectrin,SYN1,TSC1,tubulin	46	27
3	Acquisition-Sham	Developmental Disorder, Hereditary Disorder, Metabolic Disease	20s proteasome,Akt,Alpha tubulin,ATL1,ATP5F1C,ATP5PB,Beta Tubulin,cytochrome-c oxidase,FNTB,hexokinase,HK1,MAOA,Mff,MIIP,Mitochondrial complex 1,MT-ND3,N-Cadherin,NADH dehydrogenase,NDUFA9,NDUFA10,NDUFS2,Oxphos,PGRMC1,PTP4A2,PTPMT1,RTN3,SAMM50,SFXN1,SNCB,STOML2,UQCRC2,Vdac,VDAC1,VDAC2,ZFYVE27	39	24
4	Acquisition-Sham	Cell Morphology, Cellular Assembly and Organization, Cellular Function and Maintenance	caspase,CLIC4,CUL5,CYCS,DBN1,DNAJB6,DNM1L,EMC2,GFM2,GHITM,Hdac,HSP,Hsp70,Hsp90,Ikb,IMMT,MCCC1,MCCC2,Nuclear factor 1,OPA1,PHB2,PLEC,PRDX1,Raf,SCG2,Secretase gamma,SLC25A5,SPTAN1,TRIM9,TSNAX,TUBB4B,TUFM,Ubiquitin,UFL1,Vegf	39	24
5	Acquisition-Sham	Hereditary Disorder, Neurological Disease, Organismal Injury and Abnormalities	adenylate kinase,AK3,AK4,AK6,ALDH6A1,CNIH2,Collagen Alpha1,Cyclin B,DGKB,DGKG,ELAC2,ENO3,G protein,GPRASP1,HMOX2,JAK1/2,Jnk,KCNMA1,KCNQ2,KCNQ3,MRAS,NADPH oxidase,NDRG1,NPTX1,NPTXR,Pkg,potassium channel,Rab11,RBP1,SH3GL2,Sos,STMN1,TALDO1,trypsin,VAT1	36	23
6	Acquisition-Sham	Cellular Assembly and Organization, Connective Tissue Disorders, Inflammatory Disease	ANKH,BSN,cacn,CACNA1D,Cacna2d,CACNA2D1,CACNA2D2,CACNA2D3,Cacnb1,CACNB3,DNAJC5,ERC2,GAD2,GRIA,IP6K1,ITPR,L-type Calcium Channel,MICU1,Mpt pore,N-type Calcium Channel,NFkB (complex),PCLO,Presenilin,R-type Calcium Channel,RIMS1,Ryr,SCFD1,STX6,STX8,STX18,Syntaxin,UNC13A,VAMP7,voltage-gated calcium channel,ZW10	34	22
7	Acquisition-Sham	Infectious Diseases, Neurological Disease, Organismal Injury and Abnormalities	Adaptor protein 2,AFDN,Ap2 alpha,ARL6IP5,Beta adaptin,CANX,CC2D1A,CD8,CD9,CD82,DHX40,Dynamin,EGLN,FBXL16,GABA receptor,GABA-A receptor,GABRA1,GABRB2,GABRG2,GPHN,mGluR,NCEH1,Ngf,OS9,P-TEFb,PAM,PI3K (complex),PIP5K1C,PLC gamma,Profilin,SLC27A1,SYNJ1,TMEM38A,TRPV1,VKORC1	32	21
8	Acquisition-Sham	Cellular Assembly and Organization, Nervous System Development and Function, Tissue Morphology	AGTRAP,ARHGAP27,ARHGEF,ARHGEF6,ARHGEF7,ARHGEF9,ARHGEF11,ARHGEF6/7,Cadherin,CD151,CDH8,Cofilin,ERK,Gef,GIT1,GTPase,GUCY1A2,Integrin,Integrin alpha 3 beta 1,MADD,Pak,Ppp2c,PPP2R2C,Ptk,PTPN9,RAB3GAP2,Rap1,Ras homolog,RASGRF2,SNX1,SRCIN1,SYT12,TMEM184A,TMOD1,Tropomyosin	30	20
9	Acquisition-Sham	Molecular Transport, Digestive System Development and Function, Organ Morphology	ADRB,Alp,ALPP,Ampa Receptor,ANK3,ANXA4,ATPase,CAMK2D,CaMKII,CK1,Creb,Cyclin D,cytochrome C,ENPP7,EXOC6,Exoc7,Fgf,Fgfr,FOS,GCLM,GPD2,Gsk3,HSPA1A/HSPA1B,KATNA1,Macf1,MARK3,mediator,Nes,PER1,PP1 protein complex group,PPP1R9B,Rock,TOMM70,Wnt,WRNIP1	28	19
10	Acquisition-Sham	Cardiovascular System Development and Function, Cellular Movement, Organ Morphology	ADCY6,Alpha Actinin,Alpha catenin,ATP2A2,CDH2,COL2A1,COL3A1,collagen,Collagen type I,Collagen(s),E2f,Fc gamma receptor,growth factor,GSN,HACE1,Hsp27,JINK1/2,Laminin (complex),Mlc,Pdgf (complex),PDGF BB,PFKFB1,Pkc(s),Pld,PLPPR2,PP2A,PRKAA1,REN,SAR1B,SLC25A11,STAT5a/b,STK39,TGM1,TMEM165,TMEM126A	24	17
11	Acquisition-Sham	Endocrine System Disorders, Organismal Injury and Abnormalities, Cancer	AMPK,AOC3,APOB,COPS8,creatine kinase,CRP,Fibrinogen,GDF11,GFER,Gk,glutathione peroxidase,Growth hormone,GSTP1,GSTZ1,HDL,HDL-cholesterol,hemoglobin,KLHL20,LDL,LDL-cholesterol,Mapk,N-cor,NAMPT,Nos,NUDT21,PARK7,PARP,PCYOX1,PI3K (family),PRKAA,Rab5,RYR2,SNPH,Sod,STEAP3	24	17
12	Acquisition-Sham	Post-Translational Modification, Cellular Development, Carbohydrate Metabolism	14-3-3,ACPP,ATP5MF-PTCD1,CA3,Calcineurin A,Calcineurin protein(s),Cg,Ck2,DUSP1,Fcer1,FKBP8,FKBP1B,FSH,INHBA,Insulin,KCNT2,Lh,LRRC4B,MAP2K1/2,MPPED2,Nfat (family),NMDA Receptor,P38 MAPK,phosphatase,Pka,Pka catalytic subunit,Pp2c,PPM1G,Ppp1cc,PPP1R14A,PRUNE1,PTPase,PTPRN2,PTPRS,RNA polymerase II	22	16
13	Acquisition-Sham	Cell-To-Cell Signaling and Interaction, Cellular Growth and Proliferation, Cancer	ARMC10,C5orf34,CARHSP1,CCDC116,CDKN2AIP,CRELD1,CSNK2B,D-glucose,FBXL15,FRRS1L,FSTL1,GATM,INHBA,KRAS,LPAR1,MAFB,MAP9,mir-221,MSRB1,PFKM,phospholipid,PLPPR4,PPFIBP1,PRLR,PTGER3,PYROXD2,QDPR,RGS16,RPH3AL,SERPINB2,SERPINB5,SPICE1,TCEA3,TP53,TRAF1	18	14
14	Acquisition-Sham	Inflammatory Disease, Organismal Injury and Abnormalities, Respiratory Disease	1-oleoyl-lysophosphatidic acid,ACVRL1,APP,ARL5A,ATAT1,Beta ark,CCL17,CDH1,COMMD3,CPNE8,DCXR,DDRGK1,DFFA,ERICH6,Focal adhesion kinase,GALE,GLTP,GPD1,HSPB1,IL6,LRRC57,LRRC73,Lymphotoxin,mir-221,MSTN,NFKB1,norepinephrine,PAX4,RGS1,SHROOM2,SNX17,SRC,TMEM35A,TNFSF14,WASF3	16	13
15	Acquisition-Sham	Drug Metabolism, Cellular Movement, Hematological System Development and Function	ABHD6,AHR,BAMBI,C19orf44,CCL17,CCR2,CRYZ,CYP2C8,DAGLA,DSN1,DUSP14,Histone h3,Histone h4,HNF4A,IL15,IL1B,KCNH8,NBN,NOG,OSER1,PALMD,PRLR,ROGDI,SLC25A18,SLC25A51,SRP19,SRP54,SRP68,TNNI2,TRIM28,TUBA3C/TUBA3D,ZNF701,ZNF793,ZNF271P,ZNF767P	16	13
16	Acquisition-Sham	Cellular Function and Maintenance, Connective Tissue Development and Function, Developmental Disorder	APMAP,ARFGEF1,ATP6AP1,ATRN,CSAD,CYB5R1,CYP2C8,DFFA,ECEL1,EIF3J,EXOC6B,FBXO6,GCDH,GGH,HADHA,IVD,KDELC2,KIAA1211,KRT73,MAD1L1,MARCH6,ME2,NTRK1,PPARA,RABEP2,SRP68,TARS2,TOMM40L,tretinoin,UBC,UCHL5,UCP1,USP19,USP40,USP27X	15	12
17	Acquisition-Sham	Cellular Development, Cellular Growth and Proliferation, Nervous System Development and Function	ABLIM2,Ap1,BCR (complex),CD3,Cdc42,CMTR1,Cyclin A,cytokine,DPYSL5,F Actin,FAH,GOT,IFN Beta,Iga,Ige,IgG,Igg3,Igm,IKK (complex),IL1,IL12 (complex),Immunoglobulin,Interferon alpha,LAP3,MARK2,Mek,MHC Class II (complex),NFKBIA,NINJ1,p85 (pik3r),RAS,RILPL1,SRC (family),TCR,Tgf beta	11	10
18	Acquisition-Sham	Cancer, Organismal Injury and Abnormalities, Reproductive System Disease	ADRB2,AMZ2,APLNR,ATAD1,Beta Arrestin,C5AR2,CCL17,CHD7,DUSP14,EGFR,EIF4G2,FAM213B,GNRH,GNRHR,GOLPH3L,GPER1,GPRC5C,HRAS,HTRA1,IGFBP5,KCNA6,KIRREL1,L-dopa,LHCGR,MAS1,MSRB1,MYO1C,PCNX1,PFKM,RAB8A,Rnr,SFXN5,SLC29A3,TOPAZ1,TPPP3	10	9
19	Acquisition-Sham		Marc2,nitrate reductase	2	1
20	Acquisition-Sham	Cell Signaling, Nucleic Acid Metabolism, Small Molecule Biochemistry	ADCY,ADCY1,ADCY2,ADCY5,ADCY6,ADRB,BDKR,Beta ark,CACNA1C,CALCB,CCL14,CCR2,chemokine,estrogen receptor,G protein beta gamma,GCGR,GNAQ,GNRHR,GPER1,GPR68,Gαi/o,Ifn,LHCGR,LPAR2,Mmp,MMP24,Muscarinic cholinergic receptor,P2RY11,PLC,Proinsulin,PTGER3,Rac,Tnf (family),TRPV1,voltage-gated calcium channel	1	2
