# Supplementary material for: Noninvasive Brain Stimulation Enhances Memory Acquisition and Is Associated with Synaptoneurosome Modification in the Rat Hippocampus
Source: eNeuro. 2019 Dec 3;6(6):ENEURO.0311-19.2019. doi: 10.1523/ENEURO.0311-19.2019 (PMC6900464; doi:10.1523/ENEURO.0311-19.2019)
Supplement: Extended Data Figure 3-4 — Top regulators from the IPA upstream analysis for the comparisons between retrieval and sham groups and between acquisition and sham groups. Download Figure 3-4, XLSX file. [file sup_enu-eN-NWR-0311-19-s11.xlsx]

## Sheet: Sheet0
	© 2000-2018 QIAGEN. All rights reserved.
Analysis	ID	Consistency Score	Node Total	Regulator Total	Regulators	Target Total	Target Molecules in Dataset	Disease & Function Total	Diseases & Functions	Known Regulator-Disease/Function Relationship
Retrieval vs. sham	1	4.025	10	3	APP,INS,SP1	5	ALB,CBS/CBSL,INHBA,NOS1,SOD1	2	Folliculogenesis,Quantity of ovarian follicle	0% (0/6)
Retrieval vs. sham	2	3	7	1	INS	4	CBS/CBSL,NOS1,OGT,SOD1	2	Apoptosis,Quantity of ovarian follicle	50% (1/2)
Retrieval vs. sham	3	0.577	5	1	NFE2L2	3	DHCR7,PSMA6,SOD1	1	Necrosis of tumor	100% (1/1)
Retrieval vs. sham	4	0.333	11	1	APP	9	ILK,INHBA,NOS1,PGK1,PKM,SOD1,TUBA1C,TUBA4A,WNK1	1	Development of vasculature	100% (1/1)
Retrieval vs. sham	5	-6	6	1	INS	4	CBS/CBSL,NOS1,OGT,SOD1	1	Necrosis	100% (1/1)
Retrieval vs. sham	6	-7.506	5	1	TRAP1	3	PKM,SARS,SOD1	1	Angiogenesis	0% (0/1)
Retrieval vs. sham	7	-9.546	10	1	IL15	8	ALDOA,EGLN1,ICOS,LCK,PDK1,PKM,PTP4A2,SET	1	Apoptosis	100% (1/1)
	© 2000-2018 QIAGEN. All rights reserved.
Analysis	ID	Consistency Score	Node Total	Regulator Total	Regulators	Target Total	Target Molecules in Dataset	Disease & Function Total	Diseases & Functions	Known Regulator-Disease/Function Relationship
Acquisition vs. sham	1	8.731	28	4	APOE,BDNF,GSK3B,SHANK3	17	ANK3,CD82,CTNNB1,DLG4,FOS,GAD2,GRIA1,GRIA2,GRIN1,GRIN2B,HOMER1,NCDN,NLGN1,PCLO,RYR2,SYN1,TSC1	7	Formation of plasma membrane,Function of neurons,Hyperactive behavior,Memory,Organization of cytoskeleton,Plasticity of synapse,Synaptic transmission	75% (21/28)
Acquisition vs. sham	2	4.123	26	5	Hist1h1a,HIST1H1T,KLF4,PTH,SP1	17	ATP2A2,COL2A1,CTNNB1,DUSP1,FOS,GPHN,GRIA1,GRIA2,GRIN1,HADHA,INHBA,KCNQ2,MAOA,NDRG1,NFKBIA,TGM1,TSC1	4	Function of muscle,Glucose metabolism disorder,Neonatal death,Size of body	25% (5/20)
Acquisition vs. sham	3	3.266	10	1	APOE	6	ANK3,FOS,GRIA1,GRIA2,GRIN2B,HSPA1A/HSPA1B	3	Hyperactive behavior,Learning,Seizures	33% (1/3)
Acquisition vs. sham	4	-4	11	1	BDNF	9	FOS,GAD2,GRIA1,GRIA2,GRIN1,GRIN2B,HOMER1,PTPN9,SYN1	1	Motor dysfunction or movement disorder	100% (1/1)
Acquisition vs. sham	5	-4.919	7	1	BDNF	5	GRIA1,GRIA2,GRIN1,GRIN2B,HOMER1	1	Synaptic transmission of cerebral cortex cells	100% (1/1)
Acquisition vs. sham	6	-4.919	7	1	BDNF	5	GRIA1,GRIA2,GRIN1,GRIN2B,HOMER1	1	Synaptic transmission of nervous tissue	100% (1/1)
Acquisition vs. sham	7	-5.292	9	1	MYC	7	CANX,CD9,Cdc42,CYCS,NFKBIA,NUDT21,TGM1	1	Interaction of protein	100% (1/1)
Acquisition vs. sham	8	-6.124	8	1	KDM5A	6	GHITM,HOMER1,NDUFS2,OPA1,PARK7,TNNI2	1	Movement Disorders	100% (1/1)
Acquisition vs. sham	9	-6.708	7	1	BDNF	5	DUSP1,GAD2,GRIN1,GRIN2B,TSC1	1	Obesity	100% (1/1)
Acquisition vs. sham	10	-7.506	5	1	BDNF	3	GRIN1,HOMER1,TSC1	1	Habituation	0% (0/1)
Acquisition vs. sham	11	-7.506	5	1	BDNF	3	GAD2,HOMER1,SYN1	1	Release of amino acids	100% (1/1)
Acquisition vs. sham	12	-12.522	7	1	BDNF	5	GRIA2,HADHA,PTPN9,RYR2,TSC1	1	Growth Failure	100% (1/1)
Acquisition vs. sham	13	-17.75	18	1	MYC	16	ALCAM,CD151,CD9,CDH2,CTNNB1,DUSP1,FOS,GFER,HMOX2,NBN,NDRG1,NFKBIA,PHB2,RBP1,STMN1,TGM1	1	Cell survival	100% (1/1)
