# Supplementary material for: Noninvasive Brain Stimulation Enhances Memory Acquisition and Is Associated with Synaptoneurosome Modification in the Rat Hippocampus
Source: eNeuro. 2019 Dec 3;6(6):ENEURO.0311-19.2019. doi: 10.1523/ENEURO.0311-19.2019 (PMC6900464; doi:10.1523/ENEURO.0311-19.2019)
Supplement: Extended Data Table 1-1 — Results of Reactome pathway analysis for the comparison between sham and acquisition groups Download Table 1-1, XLSX file. [file sup_enu-eN-NWR-0311-19-s05.xlsx]

## Sheet: Reactome Pathways
Analysis Type:	PANTHER Overrepresentation Test (Released 20171205)
Annotation Version and Release Date:	Reactome version 65 Released 2018-06-12
Analyzed List:	Client Text Box Input (Rattus norvegicus)
Reference List:	Rattus norvegicus (all genes in database)
Test Type:	Fisher's Exact with FDR multiple test correction
Reactome pathways	Rattus norvegicus - REFLIST (21412)	Client Text Box Input (182)	Client Text Box Input (expected)	Client Text Box Input (over/under)	Client Text Box Input (fold Enrichment)	Client Text Box Input (raw P-value)	Client Text Box Input (FDR)
Neurexins and neuroligins (R-RNO-6794361)	26	9	0.22	+	40.72	1.03e-11	4.13e-09
Unblocking of NMDA receptor, glutamate binding and activation (R-RNO-438066)	16	5	0.14	+	36.77	7.34e-07	0.000197
Presynaptic depolarization and calcium channel opening (R-RNO-112308)	10	3	0.08	+	35.29	0.000158	0.0159
Ras activation upon Ca2+ influx through NMDA receptor (R-RNO-442982)	15	4	0.13	+	31.37	1.71e-05	0.00306
Synaptic adhesion-like molecules (R-RNO-8849932)	20	5	0.17	+	29.41	1.87e-06	0.000374
CREB phosphorylation through the activation of CaMKII (R-RNO-442729)	13	3	0.11	+	27.15	0.000304	0.0271
Protein-protein interactions at synapses (R-RNO-6794362)	59	13	0.5	+	25.92	3.23e-14	2.59e-11
Activation of NMDA receptor and postsynaptic events (R-RNO-442755)	35	6	0.3	+	20.17	1.16e-06	0.000266
Phase 2 - plateau phase (R-RNO-5576893)	24	4	0.2	+	19.61	8.53e-05	0.0137
CREB phosphorylation through the activation of Ras (R-RNO-442742)	25	4	0.21	+	18.82	9.83e-05	0.0132
Post NMDA receptor activation events (R-RNO-438064)	31	4	0.26	+	15.18	0.000208	0.0197
Phase 0 - rapid depolarisation (R-RNO-5576892)	36	4	0.31	+	13.07	0.000352	0.0298
Neurotransmitter release cycle (R-RNO-112310)	50	5	0.42	+	11.76	9.95e-05	0.0123
Neuronal System (R-RNO-112316)	316	29	2.69	+	10.8	1.01e-20	1.63e-17
Transmission across Chemical Synapses (R-RNO-112315)	200	18	1.7	+	10.59	4.29e-13	2.3e-10
Neurotransmitter receptors and postsynaptic signal transmission (R-RNO-112314)	133	10	1.13	+	8.85	3.83e-07	0.000123
Integration of energy metabolism (R-RNO-163685)	76	5	0.65	+	7.74	0.000615	0.047
Cardiac conduction (R-RNO-5576891)	118	7	1	+	6.98	9.3e-05	0.0136
Muscle contraction (R-RNO-397014)	168	8	1.43	+	5.6	0.000127	0.0146
Metabolism (R-RNO-1430728)	1752	29	14.89	+	1.95	0.000583	0.0468
Unclassified (UNCLASSIFIED)	12337	79	104.86	-	0.75	0.000152	0.0163
